# Supplementary material
Source: publisher site journal article supplement (http://www.spandidos-publications.com/1913/downloadSupplementary)
Supplement: Supplementary file 1 [file downloadSupplementary]

## Sheet: Gene
Table SI. Differentially expressed genes between normal aortas and Marfan syndrome tissues.
probset_id	NA	MF	FC	Regulation	P.Value	adj.P.Val	Gene_Symbol	Gene_Id	Gene_Discription	biotype	Chromosome	Strand	Public.Gene.IDs	Start	Stop	total_probes	Cytoband	Entrez.ID	mRNA.Accession	mRNA.Source	mRNA.Description	SwissProt.mRNA.Accession	SwissProt.Accession	UniGene.Accession	UniGene.ID	UniGene.Expression.Information	GO.Biological.Process.Accession	GO.Biological.Process.ID	GO.Biological.Process.Term	GO.Biological.Process.Evidence	GO.Cellular.Component.Accession	GO.Cellular.Component.ID	GO.Cellular.Component.Term	GO.Cellular.Component.Evidence	GO.Melecular.Function.Accession	GO.Molecular.Function.ID	GO.Molecular.Function.Term	GO.Molecular.Function.Evidence	Pathway.Accession	Pathway.Source	Pathway.Name	Protein.Domains.mRNA.Accession	Protein.Domains.Source	Protein.Domains.Accession	Protein.Domains.Description	ZCZDM1	ZCZDM2	ZCZDM3	ZCZDM4
TC19000228.hg.1	7.35057	9.25811	-3.75169	down	1.51978e-08	0.00102628	JUNB	NM_002229	jun B proto-oncogene	protein_coding	chr19	+	NM_002229	12902310	12904125	30	19p13.2	3726	NM_002229	RefSeq	Homo sapiens jun B proto-oncogene (JUNB), mRNA.	NM_002229	P17275	NM_002229	Hs.25292	adipose tissue| adrenal gland| ascites| bladder| blood| bone| bone marrow| brain| cervix| connective tissue| embryonic tissue| eye| heart| intestine| kidney| liver| lung| lymph| lymph node| mammary gland| mouth| nerve| ovary| pancreas| parathyroid| pituitary gland| placenta| prostate| salivary gland| skin| stomach| testis| thymus| thyroid| trachea| umbilical cord| uterus| vascular|adrenal tumor| …	NM_002229	GO:0001570	vasculogenesis	inferred from electronic annotation	NM_002229	GO:0000785	chromatin	traceable author statement	NM_002229	GO:0000977	RNA polymerase II regulatory region sequence-specific DNA binding	inferred from electronic annotation				ENST00000302754	Pfam	IPR004827	Basic-leucine zipper domain	7.52501	7.49698	7.20042	7.17986
TC17001917.hg.1	5.93689	7.44603	-2.84641	down	6.21658e-08	0.00209897	SOCS3	NM_003955	suppressor of cytokine signaling 3	protein_coding	chr17	-	NM_003955	76352859	76356158	40	17q25.3	9021	NM_003955	RefSeq	Homo sapiens suppressor of cytokine signaling 3 (SOCS3), mRNA.	NM_003955	O14543	NM_003955	Hs.527973	adipose tissue| blood| bone| brain| cervix| connective tissue| embryonic tissue| eye| heart| intestine| kidney| larynx| liver| lung| lymph node| mammary gland| mouth| nerve| ovary| pancreas| pharynx| pituitary gland| placenta| prostate| salivary gland| skin| stomach| testis| thymus| thyroid| trachea| uterus| vascular| bladder carcinoma| breast (mammary gland) tumor| chondrosarcoma| gastrointestin…	NM_003955	GO:0006469	negative regulation of protein kinase activity	traceable author statement	NM_003955	GO:0005829	cytosol	traceable author statement	NM_003955	GO:0004860	protein kinase inhibitor activity	traceable author statement				ENST00000330871	Pfam	IPR000980	SH2 domain	5.96652	5.93766	5.73744	6.10595
TC05000701.hg.1	7.54075	9.44539	-3.74417	down	2.81965e-07	0.00634684	EGR1	NM_001964	early growth response 1	protein_coding	chr5	+	NM_001964	137801169	137805004	90	5q31.1	1958	NM_001964	RefSeq	Homo sapiens early growth response 1 (EGR1), mRNA.	NM_001964	P18146	NM_001964	Hs.326035	adipose tissue| adrenal gland| ascites| bladder| blood| bone| brain| connective tissue| ear| embryonic tissue| esophagus| eye| intestine| kidney| larynx| liver| lung| mammary gland| mouth| muscle| nerve| ovary| pancreas| pharynx| pituitary gland| placenta| prostate| skin| stomach| testis| thymus| thyroid| uterus| vascular|adrenal tumor| bladder carcinoma| breast (mammary gland) tumor| chondrosarc…					NM_001964	GO:0005634	nucleus	inferred from direct assay	NM_001964	GO:0000976	transcription regulatory region sequence-specific DNA binding	inferred from direct assay	NM_001964	GenMAPP	Ovarian_Infertility_Genes	ENST00000239938	Pfam	IPR007087	Zinc finger, C2H2	7.38209	7.75904	7.56138	7.46049
TC01003638.hg.1	3.81517	6.39071	-5.96095	down	8.13379e-07	0.0137315	PTGS2	NM_000963	prostaglandin-endoperoxide synthase 2 (prostaglandin G/H synthase and cyclooxygenase)	protein_coding	chr1	-	NM_000963	186640923	186649559	150	1q25.2-q25.3	5743	NM_000963	RefSeq	Homo sapiens prostaglandin-endoperoxide synthase 2 (prostaglandin G/H synthase and cyclooxygenase) (PTGS2), mRNA.	NM_000963	P35354	NM_000963	Hs.196384	blood| bone| bone marrow| brain| cervix| connective tissue| embryonic tissue| esophagus| eye| intestine| kidney| larynx| liver| lung| mammary gland| muscle| nerve| pancreas| pharynx| placenta| prostate| skin| spleen| stomach| thyroid| trachea| umbilical cord| uterus| vascular| bladder carcinoma| chondrosarcoma| colorectal tumor| esophageal tumor| gastrointestinal tumor| glioma| head and neck tumo…					NM_000963	GO:0005634	nucleus	inferred from sequence or structural similarity	NM_000963	GO:0004601	peroxidase activity	non-traceable author statement	NM_000963	GenMAPP	Eicosanoid_Synthesis					3.76989	4.18561	3.89196	3.41322
TC14001621.hg.1	5.39519	4.59026	1.74706	up	1.55796e-06	0.0159693	FOXG1	X74144	forkhead box G1	protein_coding	chr14	+	X74144	29236931	29237598	30	14q13	2290	X74144	NONCODE	accn=X74144 class=mRNAlike lncRNA name=NULL ref=H-invitational v7.5 transcriptId=HIT000323431 cpcScore=3.8483400 cnci=-0.0841685	X74144	P55316	X74144	Hs.632336	brain| testis| normal| fetus	X74144	GO:0002052	positive regulation of neuroblast proliferation	inferred from electronic annotation	X74144	GO:0005634	nucleus	inferred from electronic annotation	X74144	GO:0003677	DNA binding	traceable author statement								5.24074	5.44279	5.4829	5.41433
TC03001939.hg.1	5.00062	6.66408	-3.16774	down	1.60249e-06	0.0159693	CCNL1	NM_020307	cyclin L1	protein_coding	chr3	-	NM_020307	156864297	156878549	550	3q25.31	57018	NM_020307	RefSeq	Homo sapiens cyclin L1 (CCNL1), mRNA.	NM_020307	Q9UK58	NM_020307	Hs.4859	adrenal gland| ascites| bladder| blood| bone| bone marrow| brain| cervix| connective tissue| embryonic tissue| esophagus| eye| heart| intestine| kidney| larynx| liver| lung| lymph| lymph node| mammary gland| mouth| muscle| nerve| ovary| pancreas| pharynx| pituitary gland| placenta| prostate| skin| spleen| stomach| testis| thymus| thyroid| trachea| uterus| vascular|adrenal tumor| bladder carcinoma…	NM_020307	GO:0000079	regulation of cyclin-dependent protein serine/threonine kinase activity	inferred from electronic annotation	NM_020307	GO:0005634	nucleus	inferred from direct assay	NM_020307	GO:0019901	protein kinase binding	inferred from electronic annotation				ENST00000295925	Pfam	IPR006671	Cyclin, N-terminal	5.32916	5.39445	4.63281	4.64607
TC07001738.hg.1	4.98306	7.0375	-4.15382	down	1.65538e-06	0.0159693	NAMPT	NM_005746	nicotinamide phosphoribosyltransferase	protein_coding	chr7	-	NM_005746	105888731	105926772	329	7q22.3	10135	NM_005746	RefSeq	Homo sapiens nicotinamide phosphoribosyltransferase (NAMPT), mRNA.	NM_005746	P43490	NM_005746	Hs.489615	adipose tissue| adrenal gland| ascites| bladder| blood| bone| bone marrow| brain| cervix| connective tissue| embryonic tissue| esophagus| eye| heart| intestine| kidney| larynx| liver| lung| lymph| lymph node| mammary gland| mouth| muscle| nerve| ovary| pancreas| parathyroid| pharynx| placenta| prostate| salivary gland| skin| spleen| stomach| testis| thymus| thyroid| trachea| uterus| vascular|adre…	NM_005746	GO:0006766	vitamin metabolic process	traceable author statement	NM_005746	GO:0005615	extracellular space	inferred from electronic annotation	NM_005746	GO:0004514	nicotinate-nucleotide diphosphorylase (carboxylating) activity	inferred from electronic annotation				ENST00000354289	Pfam	IPR007229	Nicotinate phosphoribosyltransferase family	4.95403	5.16116	4.89308	4.92395
TC05001456.hg.1	2.88411	4.23443	-2.5497	down	2.03711e-06	0.0171953	RP11-195E2.4	OTTHUMT00000372640	novel transcript	other	chr5	-	OTTHUMT00000372640	70328995	70330227	30			OTTHUMT00000372640	Havana transcript	cdna:all chromosome:VEGA56:5:71033168:71034400:-1 Gene:OTTHUMG00000163317																									3.07524	2.8099	2.87657	2.77472
TC19001995.hg.1	7.74195	8.99548	-2.38424	down	2.64743e-06	0.019864	JUNB	DQ650707	jun B proto-oncogene	protein_coding	chr19	+	DQ650707	12902290	12902585	30	19p13.2	3726	DQ650707	NONCODE	accn=DQ650707 class=mRNAlike lncRNA name=NULL ref=H-invitational v7.5 transcriptId=HIT000393016 cpcScore=-1.1377000 cnci=-1.0000000	DQ650707	P17275	DQ650707	Hs.25292	adipose tissue| adrenal gland| ascites| bladder| blood| bone| bone marrow| brain| cervix| connective tissue| embryonic tissue| eye| heart| intestine| kidney| liver| lung| lymph| lymph node| mammary gland| mouth| nerve| ovary| pancreas| parathyroid| pituitary gland| placenta| prostate| salivary gland| skin| stomach| testis| thymus| thyroid| trachea| umbilical cord| uterus| vascular|adrenal tumor| …	DQ650707	GO:0001570	vasculogenesis	inferred from electronic annotation	DQ650707	GO:0000785	chromatin	traceable author statement	DQ650707	GO:0000977	RNA polymerase II regulatory region sequence-specific DNA binding	inferred from electronic annotation								7.81466	7.59653	7.80073	7.75588
TC19000309.hg.1	4.89231	3.9371	1.93887	up	3.59014e-06	0.0242435	DQ588796	DQ588796	Homo sapiens piRNA piR-55908, complete sequence.	other	chr19	+		16149330	16149362	9			DQ588796	GenBank	Homo sapiens piRNA piR-55908, complete sequence.																									4.61309	5.16798	4.87287	4.91532
TC01000013.hg.1	5.70708	6.61673	-1.87859	down	4.25787e-06	0.0261387	M37726	M37726	Human mitochondrial Lys-tRNA-aaa.	other	chr1	+		568844	568913	30			M37726	GenBank	Human mitochondrial Lys-tRNA-aaa.																									5.74277	5.65688	5.45946	5.96922
TC01003917.hg.1	4.80677	3.82811	1.97063	up	5.19585e-06	0.0292388	Histone3	uc021pki.1		other	chr1	-		228651846	228651891	22			uc021pki.1	UCSC Genes	Rfam model RF00032 hit found at contig region AL139288.15/94175-94220																									4.68508	4.5649	4.94516	5.03192
TC22000567.hg.1	5.179	4.58344	1.51106	up	5.72226e-06	0.0293326	VPREB3	NM_013378	pre-B lymphocyte 3	protein_coding	chr22	-	NM_013378	24094930	24096655	40	22q11.23|22q11	29802	NM_013378	RefSeq	Homo sapiens pre-B lymphocyte 3 (VPREB3), mRNA.	NM_013378	Q9UKI3	NM_013378	Hs.136713	bone marrow| connective tissue| kidney| lymph node| pharynx| prostate| spleen| testis| tonsil| germ cell tumor| leukemia| normal| soft tissue/muscle tissue tumor| fetus| adult					NM_013378	GO:0005783	endoplasmic reticulum	non-traceable author statement	ENST00000248948	GO:0005515	protein binding	inferred from electronic annotation				ENST00000248948	Pfam	IPR013106	Immunoglobulin V-set domain	5.1712	5.23394	5.22065	5.0902
TC09000292.hg.1	5.78944	6.33079	-1.45534	down	6.34783e-06	0.0293326	LOC100132352	AK311167	FSHD region gene 1 pseudogene	other	chr9	+	AK311167	69065546	69106241	50	9q12	100132352	AK311167	GenBank HTC	Homo sapiens cDNA, FLJ18209.			AK311167	Hs.231861	blood| bone| bone marrow| brain| cervix| connective tissue| embryonic tissue| eye| heart| intestine| lung| lymph node| mammary gland| mouth| nerve| ovary| pituitary gland| placenta| prostate| skin| testis| thymus| trachea| uterus| breast (mammary gland) tumor| cervical tumor| chondrosarcoma| colorectal tumor| gastrointestinal tumor| germ cell tumor| head and neck tumor| leukemia| lung tumor| non-…																				5.80841	5.88498	5.76708	5.69728
TC09001185.hg.1	4.56305	5.40649	-1.79432	down	6.51565e-06	0.0293326	RP11-88I18.2	OTTHUMT00000052546	novel transcript, antisense to PGM5	antisense	chr9	-	OTTHUMT00000052546	71012849	71014187	30			OTTHUMT00000052546	Havana transcript	cdna:all chromosome:VEGA56:9:68395693:68399271:-1 Gene:OTTHUMG00000019964			ENST00000446984	Hs.729429	bone marrow| brain| lung| skin| normal| primitive neuroectodermal tumor of the CNS| skin tumor| fetus| infant| adult																				4.55084	4.298	4.80864	4.59474
TC09001095.hg.1	3.42003	4.01764	-1.51322	down	7.43286e-06	0.0293556	ZNF658B	NR_003528	zinc finger protein 658B, pseudogene	pseudogene	chr9	-	NR_003528	39415985	39508888	150	9p12	401509	NR_003528	RefSeq	Homo sapiens zinc finger protein 658B, pseudogene (ZNF658B), non-coding RNA.	NR_003528	Q4V348	NR_003528	Hs.730226		NR_003528	GO:0006351	transcription, DNA-templated	inferred from electronic annotation	NR_003528	GO:0005634	nucleus	inferred from electronic annotation	NR_003528	GO:0003677	DNA binding	inferred from electronic annotation								3.36213	3.47524	3.38593	3.45681
TC06001517.hg.1	5.54211	4.91946	1.53969	up	8.86736e-06	0.0293556	C6orf15	NM_014070	chromosome 6 open reading frame 15	protein_coding	chr6	-	NM_014070	31079000	31080336	30	6p21.3	29113	NM_014070	RefSeq	Homo sapiens chromosome 6 open reading frame 15 (C6orf15), mRNA.	NM_014070	Q6UXA7	NM_014070	Hs.272214		NM_014070	GO:0030198	extracellular matrix organization	inferred from electronic annotation	NM_014070	GO:0005614	interstitial matrix	inferred from electronic annotation	NM_014070	GO:0001968	fibronectin binding	inferred from electronic annotation								5.46	5.42936	5.66504	5.61402
TC6_dbb_hap3000138.hg.1	5.54211	4.91946	1.53969	up	8.86736e-06	0.0293556	C6orf15	NM_014070	chromosome 6 open reading frame 15	protein_coding	chr6_dbb_hap3	-	NM_014070	2376172	2377508	30	6p21.3	29113	NM_014070	RefSeq	Homo sapiens chromosome 6 open reading frame 15 (C6orf15), mRNA.	NM_014070	Q6UXA7	NM_014070	Hs.272214		NM_014070	GO:0030198	extracellular matrix organization	inferred from electronic annotation	NM_014070	GO:0005614	interstitial matrix	inferred from electronic annotation	NM_014070	GO:0001968	fibronectin binding	inferred from electronic annotation								5.46	5.42936	5.66504	5.61402
TC6_mann_hap4000126.hg.1	5.54211	4.91946	1.53969	up	8.86736e-06	0.0293556	C6orf15	NM_014070	chromosome 6 open reading frame 15	protein_coding	chr6_mann_hap4	-	NM_014070	2427346	2428682	30	6p21.3	29113	NM_014070	RefSeq	Homo sapiens chromosome 6 open reading frame 15 (C6orf15), mRNA.	NM_014070	Q6UXA7	NM_014070	Hs.272214		NM_014070	GO:0030198	extracellular matrix organization	inferred from electronic annotation	NM_014070	GO:0005614	interstitial matrix	inferred from electronic annotation	NM_014070	GO:0001968	fibronectin binding	inferred from electronic annotation								5.46	5.42936	5.66504	5.61402
TC6_mcf_hap5000126.hg.1	5.54211	4.91946	1.53969	up	8.86736e-06	0.0293556	C6orf15	NM_014070	chromosome 6 open reading frame 15	protein_coding	chr6_mcf_hap5	-	NM_014070	2460925	2462261	30	6p21.3	29113	NM_014070	RefSeq	Homo sapiens chromosome 6 open reading frame 15 (C6orf15), mRNA.	NM_014070	Q6UXA7	NM_014070	Hs.272214		NM_014070	GO:0030198	extracellular matrix organization	inferred from electronic annotation	NM_014070	GO:0005614	interstitial matrix	inferred from electronic annotation	NM_014070	GO:0001968	fibronectin binding	inferred from electronic annotation								5.46	5.42936	5.66504	5.61402
TC19001048.hg.1	7.6652	7.04643	1.53556	up	9.89964e-06	0.0293556	PIP5K1C	NM_001195733	phosphatidylinositol-4-phosphate 5-kinase, type I, gamma	protein_coding	chr19	-	NM_001195733	3630179	3700477	217	19p13.3	23396	NM_001195733	RefSeq	Homo sapiens phosphatidylinositol-4-phosphate 5-kinase, type I, gamma (PIP5K1C), transcript variant 1, mRNA.	NM_001195733	O60331	NM_001195733	Hs.282177	ascites| bladder| blood| bone| brain| cervix| connective tissue| embryonic tissue| eye| heart| intestine| kidney| lung| lymph| lymph node| mammary gland| muscle| nerve| ovary| pancreas| placenta| prostate| salivary gland| skin| spleen| stomach| testis| thyroid| uterus| vascular| bladder carcinoma| breast (mammary gland) tumor| cervical tumor| chondrosarcoma| colorectal tumor| gastrointestinal tum…	NM_001195733	GO:0006644	phospholipid metabolic process	traceable author statement	NM_001195733	GO:0001891	phagocytic cup	inferred from electronic annotation	NM_001195733	GO:0005515	protein binding	inferred from physical interaction				ENST00000335312	Pfam	IPR002498	Phosphatidylinositol-4-phosphate 5-kinase, core	7.51546	7.57983	7.66636	7.89914
TC12000779.hg.1	3.71409	4.64385	-1.90496	down	1.02125e-05	0.0293556	GAS2L3	NM_174942	growth arrest-specific 2 like 3	protein_coding	chr12	+	NM_174942	100967461	101018697	145	12q23.1	283431	NM_174942	RefSeq	Homo sapiens growth arrest-specific 2 like 3 (GAS2L3), mRNA.	NM_174942	Q86XJ1	NM_174942	Hs.20575	blood| bone marrow| brain| cervix| embryonic tissue| eye| kidney| liver| lung| mammary gland| muscle| nerve| placenta| prostate| skin| testis| vascular| breast (mammary gland) tumor| cervical tumor| germ cell tumor| glioma| kidney tumor| leukemia| liver tumor| lung tumor| normal| skin tumor| blastocyst| fetus| neonate| juvenile| adult	NM_174942	GO:0000226	microtubule cytoskeleton organization	inferred from direct assay	NM_174942	GO:0005737	cytoplasm	inferred from electronic annotation	NM_174942	GO:0003779	actin binding	inferred from direct assay				ENST00000266754	Pfam	IPR001715	Calponin homology domain	3.82211	3.5314	3.88004	3.6228
TC09001978.hg.1	3.47222	4.37867	-1.87443	down	1.06508e-05	0.0293556	uc004afc.2	uc004afc.2		ncRNA	chr9	+		68795667	68798211	30			uc004afc.2	NONCODE	accn=NULL class=lncRNA name= ref=UCSCGeneNoncode transcriptId=uc004afc.2 cpcScore=-1.1271100 cnci=-0.2545736																									3.56465	3.50398	3.35687	3.46339
TC16002026.hg.1	4.94806	4.4126	1.44941	up	1.10491e-05	0.0293556	AK055272	AK055272		ncRNA	chr16	-		89112580	89119373	30			AK055272	NONCODE	accn=AK055272 class=mRNAlike lncRNA name=Human lncRNA ref=JounralRNA transcriptId=1765 cpcScore=-0.3649390 cnci=-0.1938178			AK055272	Hs.512499	brain| liver| uterus| normal| soft tissue/muscle tissue tumor| fetus																				4.88191	4.99976	4.98511	4.92548
TC10002909.hg.1	3.89139	2.82436	2.09511	up	1.13935e-05	0.0293556	linc-TCERG1L-1	TCONS_00018650-XLOC_009001		ncRNA	chr10	-		133731725	133732096	30			TCONS_00018650-XLOC_009001	Rinn lincRNA	linc-TCERG1L-1 chr10:-:133731724-133732096																									3.69889	4.00002	4.07184	3.7948
TC19002567.hg.1	3.69681	4.65545	-1.94348	down	1.19273e-05	0.0293556	ZNF600	U52096	zinc finger protein 600	protein_coding	chr19	-	U52096	53269496	53269856	30	19q13.41	162966	U52096	NONCODE	accn=U52096 class=mRNAlike lncRNA name=NULL ref=H-invitational v7.5 transcriptId=HIT000220240 cpcScore=1.7322300 cnci=-0.1411673	U52096	Q13580	U52096	Hs.696848	ascites| bladder| brain| connective tissue| embryonic tissue| heart| intestine| liver| lung| lymph| pharynx| placenta| skin| stomach| thymus| bladder carcinoma| chondrosarcoma| colorectal tumor| gastrointestinal tumor| liver tumor| lung tumor| lymphoma| normal| skin tumor| fetus| adult	U52096	GO:0006351	transcription, DNA-templated	inferred from electronic annotation	U52096	GO:0005634	nucleus	inferred from electronic annotation	U52096	GO:0003677	DNA binding	inferred from electronic annotation								3.88314	3.50831	3.88883	3.50697
TC09001977.hg.1	5.4038	5.91211	-1.42238	down	1.20257e-05	0.0293556	LOC100132352	NR_034006	FSHD region gene 1 pseudogene	other	chr9	+	NR_034006	68726480	68768217	150	9q12	100132352	NR_034006	NONCODE	accn=NR_034006 class=lncRNA name= ref=RefGeneNoncode transcriptId=NR_034006 cpcScore=0.9534630 cnci=-0.2693158			NR_034006	Hs.231861	blood| bone| bone marrow| brain| cervix| connective tissue| embryonic tissue| eye| heart| intestine| lung| lymph node| mammary gland| mouth| nerve| ovary| pituitary gland| placenta| prostate| skin| testis| thymus| trachea| uterus| breast (mammary gland) tumor| cervical tumor| chondrosarcoma| colorectal tumor| gastrointestinal tumor| germ cell tumor| head and neck tumor| leukemia| lung tumor| non-…																				5.47225	5.4861	5.30882	5.34803
TC03002352.hg.1	4.74941	5.29452	-1.45912	down	1.23819e-05	0.0293556	CCDC66	NR_024460	coiled-coil domain containing 66	protein_coding	chr3	+	NR_024460	56591184	56655848	170	3p14.3	285331	NR_024460	NONCODE	accn=NR_024460 class=lncRNA name= ref=RefGeneNoncode transcriptId=NR_024460 cpcScore=15.0299000 cnci=-0.3232742	NR_024460	A2RUB6	NR_024460	Hs.476399	adrenal gland| ascites| bladder| blood| bone| bone marrow| brain| connective tissue| embryonic tissue| eye| heart| intestine| kidney| liver| lung| lymph node| mammary gland| mouth| muscle| nerve| ovary| pancreas| pharynx| pituitary gland| placenta| prostate| skin| spleen| stomach| testis| thymus| thyroid| trachea| uterus| vascular|adrenal tumor| bladder carcinoma| breast (mammary gland) tumor| ch…	NR_024460	GO:0046548	retinal rod cell development	inferred from electronic annotation																4.84534	4.7327	4.60853	4.81108
TC11001650.hg.1	4.39954	3.40321	1.99492	up	1.26068e-05	0.0293556	DQ591724	DQ591724	Homo sapiens piRNA piR-58836, complete sequence.	other	chr11	-		45721130	45721167	14			DQ591724	GenBank	Homo sapiens piRNA piR-58836, complete sequence.																									4.19632	4.50049	4.56455	4.33681
TC02000572.hg.1	6.14858	5.51917	1.54694	up	1.36057e-05	0.0306255	KCNIP3	NM_001034914	Kv channel interacting protein 3, calsenilin	protein_coding	chr2	+	NM_001034914	95963052	96051825	180	2q21.1	30818	NM_001034914	RefSeq	Homo sapiens Kv channel interacting protein 3, calsenilin (KCNIP3), transcript variant 2, mRNA.	NM_001034914	Q9Y2W7	NM_001034914	Hs.437376	brain| eye| intestine| kidney| lung| mammary gland| mouth| pancreas| parathyroid| placenta| prostate| stomach| testis| thymus| thyroid| uterus| gastrointestinal tumor| germ cell tumor| glioma| head and neck tumor| kidney tumor| lung tumor| non-neoplasia| normal| ovarian tumor| pancreatic tumor| uterine tumor| fetus| infant| adult	NM_001034914	GO:0000122	negative regulation of transcription from RNA polymerase II promoter	inferred from electronic annotation	NM_001034914	GO:0005634	nucleus	inferred from electronic annotation	NM_001034914	GO:0003677	DNA binding	traceable author statement				ENST00000295225	Pfam	IPR002048	EF-hand domain	5.96057	6.24533	6.08502	6.30341
TC21000838.hg.1	3.84405	3.18915	1.57451	up	1.59954e-05	0.0345577	LOC150005	AK057475	uncharacterized LOC150005	unknown	chr21	-	AK057475	19301408	19303493	30	21q21.1	150005	AK057475	NONCODE	accn=AK057475 class=mRNAlike lncRNA name=Human lncRNA ref=JounralRNA transcriptId=1871 cpcScore=-0.6437260 cnci=-0.1991172			AK057475	Hs.737033	testis| normal																				3.7391	3.81733	4.03925	3.78053
TC05002425.hg.1	5.62215	6.41387	-1.73114	down	1.63761e-05	0.0345577	GTF2H2B	NR_033417	general transcription factor IIH, polypeptide 2B (pseudogene)	pseudogene	chr5	+	NR_033417	69711197	69746189	150	5q13.2	653238	NR_033417	NONCODE	accn=NR_033417 class=lncRNA name= ref=RefGeneNoncode transcriptId=NR_033417 cpcScore=2.3534800 cnci=-0.3260915	NR_033417	Q13888	NR_033417	Hs.607501	blood| bone| bone marrow| brain| cervix| connective tissue| embryonic tissue| esophagus| heart| intestine| kidney| liver| lung| lymph| lymph node| mammary gland| muscle| ovary| pancreas| parathyroid| pituitary gland| placenta| prostate| salivary gland| skin| stomach| testis| uterus| vascular| breast (mammary gland) tumor| chondrosarcoma| colorectal tumor| esophageal tumor| gastrointestinal tumor|…	NR_033417	GO:0000718	nucleotide-excision repair, DNA damage removal	traceable author statement	NR_033417	GO:0000439	core TFIIH complex	inferred from electronic annotation	NR_033417	GO:0003676	nucleic acid binding	traceable author statement	NR_033417	GenMAPP	RNA_transcription_Reactome					5.71247	5.75697	5.60942	5.40977
TC11000856.hg.1	5.22807	6.06943	-1.79174	down	1.89923e-05	0.0377475	PCF11	NM_015885	PCF11 cleavage and polyadenylation factor subunit	protein_coding	chr11	+	NM_015885	82868030	82898493	208	11q13	51585	NM_015885	RefSeq	Homo sapiens PCF11 cleavage and polyadenylation factor subunit (PCF11), mRNA.	NM_015885	O94913	NM_015885	Hs.128959	adipose tissue| bladder| blood| bone| bone marrow| brain| cervix| connective tissue| embryonic tissue| esophagus| eye| heart| intestine| kidney| larynx| liver| lung| lymph node| mammary gland| mouth| muscle| nerve| ovary| pancreas| pharynx| pituitary gland| placenta| prostate| skin| stomach| testis| thymus| thyroid| trachea| uterus| bladder carcinoma| breast (mammary gland) tumor| cervical tumor|…	NM_015885	GO:0000398	mRNA splicing, via spliceosome	traceable author statement	NM_015885	GO:0005654	nucleoplasm	traceable author statement								ENST00000298281	Pfam	IPR006903	RNA polymerase II-binding domain	5.32174	5.16534	5.32639	5.09881
TC08000873.hg.1	4.53083	5.54922	-2.02566	down	1.90057e-05	0.0377475	SEPT14P9	ENST00000523795		pseudogene	chr8	-		142091	150563	30			ENST00000523795	ENSEMBL	havana:known chromosome:GRCh38:8:192091:200563:-1 gene:ENSG00000250210 gene_biotype:protein_coding transcript_biotype:protein_coding	ENST00000523795	D6R9T1				ENST00000523795	GO:0007049	cell cycle	inferred from electronic annotation					ENST00000523795	GO:0005525	GTP binding	inferred from electronic annotation								4.67487	4.49546	4.41999	4.533
TC0X001934.hg.1	4.62811	3.96312	1.58556	up	1.99875e-05	0.0385632	X54707	X54707		ncRNA	chrX	+		153458900	153459138	30			X54707	NONCODE	accn=X54707 class=mRNAlike lncRNA name=NULL ref=H-invitational v7.5 transcriptId=HIT000398779 cpcScore=1.8821600 cnci=-0.1631683	X54707	Q9UQS0				X54707	GO:0007165	signal transduction	inferred from electronic annotation	X54707	GO:0016020	membrane	inferred from electronic annotation	X54707	GO:0004871	signal transducer activity	inferred from electronic annotation	X54707	GenMAPP	GPCRDB_Other					4.50638	4.73862	4.65761	4.60984
TC06002702.hg.1	4.31578	3.76794	1.4619	up	2.28295e-05	0.0409379	linc-PSORS1C1-2	TCONS_00011286-XLOC_005242		ncRNA	chr6	+		30997689	31002485	30			TCONS_00011286-XLOC_005242	Rinn lincRNA	linc-PSORS1C1-2 chr6:+:30997688-31002485																									4.19642	4.49252	4.18931	4.3849
TC01004963.hg.1	2.95421	3.89604	-1.92096	down	2.30321e-05	0.0409379	PPP1R15B	AY007107	protein phosphatase 1, regulatory subunit 15B	protein_coding	chr1	+	AY007107	204372518	204373870	30	1q32.1	84919	AY007107	NONCODE	accn=AY007107 class=mRNAlike lncRNA name=Human lncRNA ref=JounralRNA transcriptId=880 cpcScore=-0.4211970 cnci=-0.3611006	AY007107	Q5SWA1	AY007107	Hs.304376	adipose tissue| adrenal gland| ascites| bladder| blood| bone| bone marrow| brain| cervix| connective tissue| ear| embryonic tissue| esophagus| eye| intestine| kidney| liver| lung| lymph| lymph node| mammary gland| mouth| muscle| nerve| ovary| pancreas| parathyroid| placenta| prostate| skin| spleen| stomach| testis| thymus| thyroid| trachea| uterus| vascular|adrenal tumor| bladder carcinoma| breas…	AY007107	GO:0006417	regulation of translation	inferred from electronic annotation	AY007107	GO:0000164	protein phosphatase type 1 complex	inferred from electronic annotation	AY007107	GO:0004722	protein serine/threonine phosphatase activity	inferred from electronic annotation								2.63634	3.25283	2.96451	2.96317
TC11001139.hg.1	4.66646	4.1629	1.41771	up	2.3171e-05	0.0409379	PANX3	NM_052959	pannexin 3	protein_coding	chr11	+	NM_052959	124481386	124490252	50	11q24.2	116337	NM_052959	RefSeq	Homo sapiens pannexin 3 (PANX3), mRNA.	NM_052959	Q96QZ0	NM_052959	Hs.99235	normal	NM_052959	GO:0006811	ion transport	inferred from electronic annotation	NM_052959	GO:0005886	plasma membrane	inferred from electronic annotation	NM_052959	GO:0055077	gap junction hemi-channel activity	inferred from sequence or structural similarity				ENST00000284288	Pfam	IPR000990	Innexin	4.68883	4.78208	4.57428	4.62067
TC08000836.hg.1	5.56417	5.04661	1.43153	up	2.36432e-05	0.0409379	SPATC1	NM_001134374	spermatogenesis and centriole associated 1	protein_coding	chr8	+	NM_001134374	145086582	145102015	60	8q24.3	375686	NM_001134374	RefSeq	Homo sapiens spermatogenesis and centriole associated 1 (SPATC1), transcript variant 2, mRNA.	NM_001134374	Q76KD6	NM_001134374	Hs.97726	brain| testis| normal| fetus| adult					NM_001134374	GO:0005737	cytoplasm	inferred from electronic annotation	NM_001134374	GO:0043015	gamma-tubulin binding	inferred from electronic annotation								5.50904	5.57505	5.57301	5.59956
TC17001743.hg.1	5.13716	5.66836	-1.44514	down	2.56549e-05	0.0424509	TRIM37	NM_001005207	tripartite motif containing 37	protein_coding	chr17	-	NM_001005207	57060000	57184266	300	17q23.2	4591	NM_001005207	RefSeq	Homo sapiens tripartite motif containing 37 (TRIM37), transcript variant 2, mRNA.	NM_001005207	O94972	NM_001005207	Hs.579079	adipose tissue| bladder| blood| bone| bone marrow| brain| connective tissue| embryonic tissue| esophagus| eye| heart| intestine| kidney| liver| lung| lymph| lymph node| mammary gland| mouth| muscle| ovary| pancreas| pituitary gland| placenta| skin| testis| thymus| thyroid| trachea| uterus| breast (mammary gland) tumor| chondrosarcoma| colorectal tumor| esophageal tumor| germ cell tumor| glioma| h…	NM_001005207	GO:0032088	negative regulation of NF-kappaB transcription factor activity	inferred from direct assay	NM_001005207	GO:0005737	cytoplasm	inferred from direct assay	NM_001005207	GO:0004842	ubiquitin-protein transferase activity	inferred from direct assay				ENST00000262294	Pfam	IPR000315	Zinc finger, B-box	5.14891	5.24208	5.13795	5.01968
TC01001624.hg.1	5.81859	8.12447	-4.94469	down	2.62596e-05	0.0424509	RGS2	NM_002923	regulator of G-protein signaling 2	protein_coding	chr1	+	NM_002923	192778169	192781407	110	1q31	5997	NM_002923	RefSeq	Homo sapiens regulator of G-protein signaling 2 (RGS2), mRNA.	NM_002923	P41220	NM_002923	Hs.78944	adipose tissue| adrenal gland| ascites| bladder| blood| bone| bone marrow| brain| connective tissue| embryonic tissue| esophagus| eye| heart| intestine| kidney| liver| lung| lymph node| mammary gland| mouth| muscle| nerve| ovary| pancreas| pharynx| pituitary gland| placenta| prostate| skin| spleen| stomach| testis| thymus| thyroid| uterus| vascular| bladder carcinoma| breast (mammary gland) tumor…	NM_002923	GO:0006417	regulation of translation	inferred from electronic annotation	NM_002923	GO:0005730	nucleolus	inferred from electronic annotation	NM_002923	GO:0005096	GTPase activator activity	not recorded	NM_002923	GenMAPP	Calcium_regulation_in_cardiac_cells	ENST00000235382	Pfam	IPR000342	Regulator of G protein signalling domain	6.00009	5.86827	5.96243	5.44357
TC12000202.hg.1	4.16345	3.58092	1.49747	up	2.68842e-05	0.0424509	RERG-AS1	ENST00000541243	RERG antisense RNA 1	ncRNA	chr12	+	ENST00000541243	15304857	15308217	30	12p12.3	100873980	ENST00000541243	ENSEMBL	havana:known chromosome:GRCh38:12:15151923:15155283:1 gene:ENSG00000255660 gene_biotype:lincRNA transcript_biotype:lincRNA			ENST00000541243	Hs.569154	kidney| normal																				4.06051	4.09327	4.28155	4.21845
TC02002445.hg.1	5.23521	8.87931	-12.5021	down	2.71831e-05	0.0424509	NR4A2	NM_006186	nuclear receptor subfamily 4, group A, member 2	protein_coding	chr2	-	NM_006186	157180944	157198860	230	2q22-q23	4929	NM_006186	RefSeq	Homo sapiens nuclear receptor subfamily 4, group A, member 2 (NR4A2), mRNA.	NM_006186	P43354	NM_006186	Hs.563344	adrenal gland| bladder| blood| bone marrow| brain| cervix| connective tissue| ear| embryonic tissue| eye| heart| intestine| kidney| liver| lung| mammary gland| mouth| muscle| nerve| ovary| pancreas| parathyroid| pituitary gland| prostate| skin| spleen| stomach| testis| thymus| thyroid| trachea| uterus| vascular| breast (mammary gland) tumor| chondrosarcoma| gastrointestinal tumor| germ cell tumor…					NM_006186	GO:0005634	nucleus	inferred from direct assay	NM_006186	GO:0003707	steroid hormone receptor activity	inferred from electronic annotation	NM_006186	GenMAPP	Nuclear_Receptors	ENST00000339562	Pfam	IPR000536	Nuclear hormone receptor, ligand-binding, core	5.27949	5.35066	5.05261	5.25808
TC01003621.hg.1	4.53997	4.13571	1.32341	up	2.81571e-05	0.0424509	COLGALT2	NM_015101	collagen beta(1-O)galactosyltransferase 2	protein_coding	chr1	-	NM_015101	183898796	184006878	210	1q25	23127	NM_015101	RefSeq	Homo sapiens collagen beta(1-O)galactosyltransferase 2 (COLGALT2), mRNA.	NM_015101	Q8IYK4	NM_015101	Hs.387995	adrenal gland| blood| bone| bone marrow| brain| connective tissue| embryonic tissue| eye| heart| intestine| kidney| lung| mammary gland| muscle| pancreas| pituitary gland| prostate| testis| thymus| trachea| uterus|adrenal tumor| chondrosarcoma| gastrointestinal tumor| germ cell tumor| glioma| kidney tumor| leukemia| non-neoplasia| normal| pancreatic tumor| primitive neuroectodermal tumor of the C…	NM_015101	GO:0009103	lipopolysaccharide biosynthetic process	inferred from electronic annotation	NM_015101	GO:0005788	endoplasmic reticulum lumen	traceable author statement	NM_015101	GO:0050211	procollagen galactosyltransferase activity	inferred from electronic annotation				ENST00000367520	Pfam	IPR002654	Glycosyl transferase, family 25	4.54121	4.52759	4.52879	4.5623
TC14000414.hg.1	6.08241	5.35296	1.65801	up	2.84039e-05	0.0424509	GALNT16	NM_001168368	polypeptide N-acetylgalactosaminyltransferase 16	protein_coding	chr14	+	NM_001168368	69725994	69821190	262	14q24.1	57452	NM_001168368	RefSeq	Homo sapiens polypeptide N-acetylgalactosaminyltransferase 16 (GALNT16), transcript variant 1, mRNA.	NM_001168368	Q8N428	NM_001168368	Hs.21035	adrenal gland| bone| brain| connective tissue| embryonic tissue| eye| heart| intestine| kidney| lung| mammary gland| mouth| nerve| pancreas| placenta| skin| spleen| testis| thymus| thyroid| uterus| breast (mammary gland) tumor| chondrosarcoma| germ cell tumor| glioma| head and neck tumor| non-neoplasia| normal| primitive neuroectodermal tumor of the CNS| uterine tumor|embryoid body| fetus| neonat…	NM_001168368	GO:0006486	protein glycosylation	inferred from electronic annotation	NM_001168368	GO:0000139	Golgi membrane	inferred from electronic annotation	NM_001168368	GO:0004653	polypeptide N-acetylgalactosaminyltransferase activity	inferred from electronic annotation				ENST00000448469	Pfam	IPR000772	Ricin B lectin domain	5.85072	6.3248	5.9759	6.1782
TC17000369.hg.1	5.62238	6.12848	-1.4202	down	2.98211e-05	0.0424509	SUZ12	NM_015355	SUZ12 polycomb repressive complex 2 subunit	protein_coding	chr17	+	NM_015355	30264044	30328064	247	17q11.2	23512	NM_015355	RefSeq	Homo sapiens SUZ12 polycomb repressive complex 2 subunit (SUZ12), mRNA.	NM_015355	Q15022	NM_015355	Hs.462732	adrenal gland| ascites| bladder| blood| bone| bone marrow| brain| cervix| connective tissue| ear| embryonic tissue| eye| heart| intestine| kidney| liver| lung| lymph| lymph node| mammary gland| muscle| ovary| pancreas| placenta| prostate| skin| stomach| testis| thymus| thyroid| trachea| umbilical cord| uterus| vascular| bladder carcinoma| breast (mammary gland) tumor| cervical tumor| chondrosarco…	NM_015355	GO:0000122	negative regulation of transcription from RNA polymerase II promoter	inferred from electronic annotation	NM_015355	GO:0001739	sex chromatin	inferred from electronic annotation	NM_015355	GO:0003682	chromatin binding	inferred from electronic annotation				ENST00000322652	Pfam	IPR019135	Polycomb protein, VEFS-Box	5.61976	5.57736	5.61916	5.67326
TC14001236.hg.1	2.78112	3.7007	-1.89156	down	3.05523e-05	0.0424509	ATP6V1D	ENST00000553974	ATPase, H+ transporting, lysosomal 34kDa, V1 subunit D	protein_coding	chr14	-	ENST00000553974	67778722	67804493	30	14q23-q24.2	51382	ENST00000553974	ENSEMBL	havana:known chromosome:GRCh38:14:67312005:67337776:-1 gene:ENSG00000100554 gene_biotype:protein_coding transcript_biotype:processed_transcript	ENST00000553974	Q9Y5K8	ENST00000553974	Hs.272630	adipose tissue| adrenal gland| ascites| bladder| blood| bone| bone marrow| brain| cervix| connective tissue| ear| embryonic tissue| esophagus| eye| heart| intestine| kidney| liver| lung| lymph node| mammary gland| mouth| muscle| nerve| ovary| pancreas| parathyroid| pharynx| pituitary gland| placenta| prostate| skin| stomach| testis| thyroid| trachea| umbilical cord| uterus| vascular|adrenal tumor…	ENST00000553974	GO:0006879	cellular iron ion homeostasis	traceable author statement	ENST00000553974	GO:0005765	lysosomal membrane	inferred from direct assay	ENST00000553974	GO:0005515	protein binding	inferred from physical interaction								2.77181	2.79274	2.60017	2.95977
TC07000354.hg.1	5.61482	5.09714	1.43165	up	3.11986e-05	0.0424509	MIR3147	NR_036102	microRNA 3147	miRNA	chr7	+	NR_036102	57472731	57472796	30		100422939	NR_036102	RefSeq	Homo sapiens microRNA 3147 (MIR3147), microRNA.																									5.57279	5.60493	5.59787	5.68368
TC12002977.hg.1	8.97029	9.50376	-1.4474	down	3.20721e-05	0.0424509	linc-PPP1R12A	TCONS_l2_00006336-XLOC_l2_003434		ncRNA	chr12	-		80496697	80497140	30			TCONS_l2_00006336-XLOC_l2_003434	Broad TUCP	linc-PPP1R12A chr12:-:80496696-80497140																									8.90669	9.12953	8.9412	8.90374
TC05000891.hg.1	4.35177	4.87434	-1.43651	down	3.22964e-05	0.0424509	TTC1	NM_003314	tetratricopeptide repeat domain 1	protein_coding	chr5	+	NM_003314	159436120	159492550	138	5q33.3	7265	NM_003314	RefSeq	Homo sapiens tetratricopeptide repeat domain 1 (TTC1), transcript variant 1, mRNA.	NM_003314	Q99614	NM_003314	Hs.519718	adipose tissue| adrenal gland| ascites| blood| bone| bone marrow| brain| cervix| connective tissue| embryonic tissue| esophagus| eye| heart| intestine| kidney| liver| lung| lymph| lymph node| mammary gland| mouth| muscle| nerve| ovary| pancreas| parathyroid| pharynx| pituitary gland| placenta| prostate| skin| stomach| testis| thymus| thyroid| trachea| umbilical cord| uterus| vascular|adrenal tumo…	NM_003314	GO:0006457	protein folding	non-traceable author statement	NM_003314	GO:0005778	peroxisomal membrane	inferred from direct assay	NM_003314	GO:0005515	protein binding	inferred from physical interaction				ENST00000231238	Pfam	IPR001440	Tetratricopeptide TPR1	4.40038	4.32504	4.31221	4.36944
TC08000943.hg.1	4.6587	5.2576	-1.51456	down	3.25396e-05	0.0424509	MFHAS1	NM_004225	malignant fibrous histiocytoma amplified sequence 1	protein_coding	chr8	-	NM_004225	8640864	8751155	106	8p23.1	9258	NM_004225	RefSeq	Homo sapiens malignant fibrous histiocytoma amplified sequence 1 (MFHAS1), mRNA.	NM_004225	Q9Y4C4	NM_004225	Hs.379414	adipose tissue| adrenal gland| ascites| bladder| blood| brain| embryonic tissue| eye| intestine| kidney| liver| lung| lymph node| mammary gland| mouth| muscle| ovary| pancreas| placenta| skin| stomach| testis| thymus| thyroid| tonsil| umbilical cord| uterus| vascular| breast (mammary gland) tumor| colorectal tumor| gastrointestinal tumor| germ cell tumor| glioma| head and neck tumor| leukemia| li…									NM_004225	GO:0005515	protein binding	inferred from physical interaction				ENST00000276282	Pfam	IPR001611	Leucine-rich repeat	4.67423	4.58017	4.77708	4.60331
TC0X000337.hg.1	1.68195	2.66618	-1.97826	down	3.26894e-05	0.0424509	AL353698.1	ENST00000433279		other	chrX	+		56100757	56102014	30			ENST00000433279	ENSEMBL	[retired]cdna:known chromosome:GRCh37:X:56100757:56102014:1 gene:ENSG00000233889 gene_biotype:protein_coding transcript_biotype:protein_coding																									1.78574	1.80109	1.65974	1.48123
TC15001647.hg.1	5.20497	3.417	3.45328	up	3.58323e-05	0.0452355	CYP1A1	NM_000499	cytochrome P450, family 1, subfamily A, polypeptide 1	protein_coding	chr15	-	NM_000499	75011883	75017951	172	15q24.1	1543	NM_000499	RefSeq	Homo sapiens cytochrome P450, family 1, subfamily A, polypeptide 1 (CYP1A1), mRNA.	NM_000499	P04798	NM_000499	Hs.72912	adipose tissue| blood| bone| brain| cervix| connective tissue| embryonic tissue| esophagus| heart| intestine| liver| lung| mammary gland| pancreas| prostate| skin| stomach| testis| trachea| uterus| bladder carcinoma| cervical tumor| chondrosarcoma| colorectal tumor| esophageal tumor| gastrointestinal tumor| germ cell tumor| liver tumor| non-neoplasia| normal| skin tumor|embryoid body| fetus| adult					NM_000499	GO:0005739	mitochondrion	inferred from electronic annotation								ENST00000379727	Pfam	IPR001128	Cytochrome P450	5.32297	5.97056	5.41993	4.10641
TC09000289.hg.1	5.62956	6.2123	-1.49769	down	3.63664e-05	0.0452355	LOC100132352	NR_034006	FSHD region gene 1 pseudogene	other	chr9	+	NR_034006	68726541	68767301	68	9q12	100132352	NR_034006	RefSeq	Homo sapiens FSHD region gene 1 pseudogene (LOC100132352), non-coding RNA.			NR_034006	Hs.231861	blood| bone| bone marrow| brain| cervix| connective tissue| embryonic tissue| eye| heart| intestine| lung| lymph node| mammary gland| mouth| nerve| ovary| pituitary gland| placenta| prostate| skin| testis| thymus| trachea| uterus| breast (mammary gland) tumor| cervical tumor| chondrosarcoma| colorectal tumor| gastrointestinal tumor| germ cell tumor| head and neck tumor| leukemia| lung tumor| non-…																				5.67159	5.77509	5.51303	5.55856
TC02001765.hg.1	5.86322	6.36142	-1.41245	down	3.68433e-05	0.0452355	MAP4K3	NM_003618	mitogen-activated protein kinase kinase kinase kinase 3	protein_coding	chr2	-	NM_003618	39476407	39664453	524	2p22.1	8491	NM_003618	RefSeq	Homo sapiens mitogen-activated protein kinase kinase kinase kinase 3 (MAP4K3), transcript variant 1, mRNA.	NM_003618	Q8IVH8	NM_003618	Hs.655750	adrenal gland| ascites| bladder| bone| bone marrow| brain| connective tissue| ear| embryonic tissue| eye| heart| intestine| kidney| larynx| liver| lung| lymph node| mammary gland| mouth| muscle| pancreas| pharynx| placenta| prostate| skin| spleen| stomach| testis| thymus| thyroid| uterus| vascular|adrenal tumor| bladder carcinoma| breast (mammary gland) tumor| chondrosarcoma| colorectal tumor| ga…	NM_003618	GO:0000185	activation of MAPKKK activity	not recorded	NM_003618	GO:0005737	cytoplasm	not recorded	NM_003618	GO:0004672	protein kinase activity	traceable author statement				ENST00000341681	Pfam	IPR000719	Protein kinase domain	5.80795	5.89397	5.81323	5.93773
TC03003103.hg.1	3.37554	3.95044	-1.48957	down	3.75533e-05	0.045284	AK026713	AK026713		ncRNA	chr3	-		134066130	134068067	30			AK026713	NONCODE	accn=AK026713 class=mRNAlike lncRNA name=Human lncRNA ref=JounralRNA transcriptId=2017 cpcScore=-1.0374300 cnci=-0.2891481			AK026713	Hs.542965																					3.50623	3.40124	3.33203	3.26266
TC0X001835.hg.1	4.91444	5.66681	-1.68456	down	3.88192e-05	0.0456356	ALG13	NR_033125	ALG13, UDP-N-acetylglucosaminyltransferase subunit	protein_coding	chrX	+	NR_033125	110924346	111003875	329	Xq23	79868	NR_033125	NONCODE	accn=NR_033125 class=lncRNA name= ref=RefGeneNoncode transcriptId=NR_033125 cpcScore=1.4075600 cnci=-0.4489273	NR_033125	Q9NP73	NR_033125	Hs.443061	adipose tissue| adrenal gland| bladder| blood| bone marrow| brain| connective tissue| embryonic tissue| esophagus| eye| heart| intestine| kidney| liver| lung| lymph node| mammary gland| mouth| muscle| ovary| pancreas| parathyroid| pharynx| pituitary gland| placenta| prostate| stomach| testis| thymus| thyroid| trachea| uterus| vascular| bladder carcinoma| breast (mammary gland) tumor| chondrosarco…	NR_033125	GO:0006488	dolichol-linked oligosaccharide biosynthetic process	traceable author statement	NR_033125	GO:0005789	endoplasmic reticulum membrane	traceable author statement	NR_033125	GO:0004577	N-acetylglucosaminyldiphosphodolichol N-acetylglucosaminyltransferase activity	inferred from electronic annotation								5.14678	4.9993	4.79065	4.72102
TC19001977.hg.1	5.30084	6.79545	-2.81787	down	3.91965e-05	0.0456356	ICAM1	M55091	intercellular adhesion molecule 1	protein_coding	chr19	+	M55091	10396161	10396374	30	19p13.3-p13.2	3383	M55091	NONCODE	accn=M55091 class=mRNAlike lncRNA name=NULL ref=H-invitational v7.5 transcriptId=HIT000195767 cpcScore=-1.2394600 cnci=-0.4641472	M55091	P05362	M55091	Hs.643447	adipose tissue| adrenal gland| bladder| blood| bone marrow| brain| cervix| connective tissue| embryonic tissue| esophagus| eye| heart| intestine| kidney| liver| lung| lymph| lymph node| mammary gland| mouth| muscle| nerve| ovary| pancreas| placenta| prostate| skin| spleen| stomach| testis| thymus| thyroid| trachea| uterus| vascular| bladder carcinoma| breast (mammary gland) tumor| cervical tumor|…	M55091	GO:0001541	ovarian follicle development	inferred from electronic annotation	M55091	GO:0001772	immunological synapse	inferred from electronic annotation	M55091	GO:0001618	virus receptor activity	inferred from electronic annotation								5.48337	5.3832	5.17565	5.16113
TC08001964.hg.1	4.30011	3.84712	1.36887	up	4.00933e-05	0.0458885	linc-SULF1-1	TCONS_00014747-XLOC_006831		ncRNA	chr8	+		70270873	70306748	30			TCONS_00014747-XLOC_006831	Rinn lincRNA	linc-SULF1-1 chr8:+:70270872-70306748																									4.39766	4.14821	4.2932	4.36136
TC19000647.hg.1	5.94361	7.83834	-3.71851	down	4.21978e-05	0.0472208	FOSB	NM_001114171	FBJ murine osteosarcoma viral oncogene homolog B	protein_coding	chr19	+	NM_001114171	45971253	45978437	140	19q13.32	2354	NM_001114171	RefSeq	Homo sapiens FBJ murine osteosarcoma viral oncogene homolog B (FOSB), transcript variant 2, mRNA.	NM_001114171	P53539	NM_001114171	Hs.590958	adipose tissue| adrenal gland| ascites| blood| bone| brain| cervix| connective tissue| embryonic tissue| eye| heart| intestine| kidney| larynx| liver| lung| lymph node| mammary gland| mouth| muscle| ovary| pancreas| placenta| prostate| spleen| stomach| testis| thymus| thyroid| tonsil| trachea| uterus| breast (mammary gland) tumor| chondrosarcoma| colorectal tumor| gastrointestinal tumor| head and…	NM_001114171	GO:0000122	negative regulation of transcription from RNA polymerase II promoter	traceable author statement	NM_001114171	GO:0005634	nucleus	inferred from electronic annotation	NM_001114171	GO:0003677	DNA binding	traceable author statement				ENST00000353609	Pfam	IPR004827	Basic-leucine zipper domain	6.45767	6.22684	5.39952	5.69041
TC11000045.hg.1	5.27502	4.76975	1.41939	up	4.57467e-05	0.0472208	KRTAP5-AS1	NR_021489	KRTAP5-1/KRTAP5-2 antisense RNA 1	antisense	chr11	+	NR_021489	1593971	1620414	30	11p15.5	338651	NR_021489	RefSeq	Homo sapiens KRTAP5-1/KRTAP5-2 antisense RNA 1 (KRTAP5-AS1), long non-coding RNA.	NR_021489	Q701N4	NR_021489	Hs.633229	brain| lung| lung tumor| normal| fetus| adult	NR_021489	GO:0032774	RNA biosynthetic process	inferred from electronic annotation	NR_021489	GO:0005882	intermediate filament	inferred from electronic annotation	NR_021489	GO:0003899	DNA-directed RNA polymerase activity	inferred from electronic annotation								5.16498	5.20107	5.3358	5.39822
TC11000336.hg.1	4.80337	4.27304	1.44426	up	4.67298e-05	0.0472208	RP4-683L5.1	ENST00000534165		antisense	chr11	+		35440604	35442549	30			ENST00000534165	ENSEMBL	havana:known chromosome:GRCh38:11:35419057:35421002:1 gene:ENSG00000255542 gene_biotype:antisense transcript_biotype:antisense			ENST00000534165	Hs.607120	brain| glioma																				4.80543	4.94963	4.71444	4.74398
TC06001625.hg.1	3.08732	2.29907	1.72697	up	4.68355e-05	0.0472208	DQ573704	DQ573704	Homo sapiens piRNA piR-41816, complete sequence.	other	chr6	-		33846532	33846576	21			DQ573704	GenBank	Homo sapiens piRNA piR-41816, complete sequence.																									3.2346	2.88238	3.13324	3.09906
TC6_cox_hap2000050.hg.1	3.18437	2.80424	1.30146	up	4.71611e-05	0.0472208	DPCR1	NM_080870	diffuse panbronchiolitis critical region 1	protein_coding	chr6_cox_hap2	+	NM_080870	2420690	2433901	77	6p21.33	135656	NM_080870	RefSeq	Homo sapiens diffuse panbronchiolitis critical region 1 (DPCR1), mRNA.	NM_080870	Q3MIW9	NM_080870	Hs.631993	adrenal gland| intestine| pancreas| stomach|adrenal tumor| gastrointestinal tumor| normal| pancreatic tumor| adult					NM_080870	GO:0016021	integral component of membrane	inferred from electronic annotation												3.16627	3.23581	3.16089	3.17452
TC01006379.hg.1	6.15351	5.68514	1.38355	up	4.79034e-05	0.0472208	SPRR2G	NM_001014291	small proline-rich protein 2G	protein_coding	chr1	-	NM_001014291	153122365	153122586	20	1q21-q22	6706	NM_001014291	RefSeq	Homo sapiens small proline-rich protein 2G (SPRR2G), mRNA.	NM_001014291	Q9BYE4	NM_001014291	Hs.490253	brain| connective tissue| mouth| pharynx| testis| head and neck tumor| normal| soft tissue/muscle tissue tumor| fetus| adult	NM_001014291	GO:0008544	epidermis development	non-traceable author statement	NM_001014291	GO:0001533	cornified envelope	non-traceable author statement												6.12349	6.16902	6.21514	6.10639
TC13001263.hg.1	3.00648	3.7741	-1.70245	down	4.82825e-05	0.0472208	BIVM	AF147319	basic, immunoglobulin-like variable motif containing	protein_coding	chr13	+	AF147319	103492685	103493041	30	13q33.1	54841	AF147319	NONCODE	accn=AF147319 class=mRNAlike lncRNA name=NULL ref=H-invitational v7.5 transcriptId=HIT000071392 cpcScore=-1.1788900 cnci=-0.3486581	AF147319	Q86UB2	AF147319	Hs.288809	bladder| blood| bone| bone marrow| brain| cervix| connective tissue| ear| embryonic tissue| esophagus| eye| heart| intestine| kidney| liver| lung| mammary gland| mouth| muscle| ovary| pancreas| parathyroid| pharynx| placenta| prostate| skin| spleen| stomach| testis| thymus| thyroid| trachea| uterus| vascular| breast (mammary gland) tumor| cervical tumor| chondrosarcoma| colorectal tumor| esophage…					AF147319	GO:0005615	extracellular space	inferred from direct assay												3.23291	2.85836	3.05893	2.87573
TC14002127.hg.1	3.10494	2.48786	1.53376	up	4.86492e-05	0.0472208	BC042084	BC042084		ncRNA	chr14	-		93372042	93373827	30			BC042084	NONCODE	accn=BC042084 class=mRNAlike lncRNA name=Human lncRNA ref=JounralRNA transcriptId=854 cpcScore=-0.7475520 cnci=-0.1612388			BC042084	Hs.639356	normal																				3.1707	3.16068	2.93552	3.15286
TC0X002087.hg.1	1.36207	1.77776	-1.33394	down	4.91922e-05	0.0472208	KLF8	AF069138	Kruppel-like factor 8	protein_coding	chrX	-	AF069138	56311188	56312246	25	Xp11.21	11279	AF069138	NONCODE	accn=AF069138 class=mRNAlike lncRNA name=Human lncRNA ref=JounralRNA transcriptId=4712 cpcScore=-0.8570020 cnci=-0.3394684	AF069138	O95600	AF069138	Hs.646614	adrenal gland| bone| brain| connective tissue| embryonic tissue| esophagus| eye| heart| kidney| larynx| lung| lymph node| mammary gland| mouth| muscle| nerve| pancreas| pharynx| placenta| prostate| skin| testis| thymus| trachea| uterus| vascular| chondrosarcoma| germ cell tumor| head and neck tumor| kidney tumor| leukemia| lymphoma| normal| uterine tumor|embryoid body| blastocyst| fetus| adult	AF069138	GO:0006351	transcription, DNA-templated	inferred from electronic annotation	AF069138	GO:0005634	nucleus	inferred from electronic annotation	AF069138	GO:0003677	DNA binding	inferred from electronic annotation								1.31782	1.42324	1.34125	1.36596
TC09000178.hg.1	6.98834	5.85217	2.19797	up	5.12723e-05	0.0472208	DNAJB5	NM_001135004	DnaJ (Hsp40) homolog, subfamily B, member 5	protein_coding	chr9	+	NM_001135004	34989638	34998897	207	9p13.3	25822	NM_001135004	RefSeq	Homo sapiens DnaJ (Hsp40) homolog, subfamily B, member 5 (DNAJB5), transcript variant 2, mRNA.	NM_001135004	O75953	NM_001135004	Hs.237506	adrenal gland| blood| bone| brain| connective tissue| embryonic tissue| eye| heart| intestine| kidney| larynx| liver| lung| lymph node| mammary gland| muscle| ovary| pancreas| parathyroid| pituitary gland| placenta| prostate| skin| spleen| testis| thyroid| uterus|adrenal tumor| chondrosarcoma| colorectal tumor| germ cell tumor| glioma| head and neck tumor| liver tumor| lymphoma| normal| ovarian t…	NM_001135004	GO:0000122	negative regulation of transcription from RNA polymerase II promoter	inferred from electronic annotation	NM_001135004	GO:0005634	nucleus	inferred from electronic annotation	NM_001135004	GO:0005515	protein binding	inferred from physical interaction				ENST00000312316	Pfam	IPR001623	DnaJ domain	6.84082	6.88448	6.6649	7.56316
TC17002469.hg.1	5.1786	4.62506	1.46768	up	5.18922e-05	0.0472208	linc-TP53	TCONS_00025553-XLOC_012379		ncRNA	chr17	-		7607077	7608261	30			TCONS_00025553-XLOC_012379	Rinn lincRNA	linc-TP53 chr17:-:7607076-7608261																									5.21078	5.2605	5.01475	5.22836
TC15000280.hg.1	5.0287	4.44714	1.49647	up	5.24422e-05	0.0472208	PHGR1	NM_001145643	proline/histidine/glycine-rich 1	protein_coding	chr15	+	NM_001145643	40643234	40648635	28	15q15.1	644844	NM_001145643	RefSeq	Homo sapiens proline/histidine/glycine-rich 1 (PHGR1), mRNA.	NM_001145643	C9JFL3	NM_001145643	Hs.447537	intestine| stomach| colorectal tumor| leukemia| normal| adult																				4.96721	4.87438	5.23862	5.03461
TC06003178.hg.1	1.49362	2.75426	-2.39602	down	5.28597e-05	0.0472208	BC029474	BC029474		ncRNA	chr6	+		163894452	163895192	30			BC029474	NONCODE	accn=BC029474 class=mRNAlike lncRNA name=Human lncRNA ref=JounralRNA transcriptId=4655 cpcScore=-1.2074700 cnci=-0.4708967			BC029474	Hs.684442																					1.61287	1.6281	1.48568	1.24784
TC15000386.hg.1	3.31489	4.40446	-2.12812	down	5.42882e-05	0.0472208	FGF7	NM_002009	fibroblast growth factor 7	protein_coding	chr15	+	NM_002009	49715293	49780972	100	15q21.2	2252	NM_002009	RefSeq	Homo sapiens fibroblast growth factor 7 (FGF7), mRNA.	NM_002009	P21781	NM_002009	Hs.567268	bone| bone marrow| brain| cervix| connective tissue| ear| embryonic tissue| eye| heart| intestine| kidney| liver| lung| mammary gland| muscle| nerve| pancreas| pharynx| placenta| prostate| skin| stomach| trachea| umbilical cord| uterus| vascular| cervical tumor| chondrosarcoma| gastrointestinal tumor| liver tumor| non-neoplasia| normal| pancreatic tumor| primitive neuroectodermal tumor of the CNS…	NM_002009	GO:0007165	signal transduction	non-traceable author statement	NM_002009	GO:0005576	extracellular region	traceable author statement	NM_002009	GO:0005104	fibroblast growth factor receptor binding	inferred from electronic annotation				ENST00000267843	Pfam	IPR002209	Fibroblast growth factor family	3.19931	3.27747	3.34649	3.43628
TC06003868.hg.1	3.04287	2.53569	1.42127	up	5.43037e-05	0.0472208	linc-AHI1	TCONS_00011567-XLOC_005844		ncRNA	chr6	-		136128286	136129604	30			TCONS_00011567-XLOC_005844	Rinn lincRNA	linc-AHI1 chr6:-:136128285-136129604																									3.20211	3.06896	2.88246	3.01795
TC19001704.hg.1	5.65089	5.15968	1.40562	up	5.50066e-05	0.0472208	LHB	NM_000894	luteinizing hormone beta polypeptide	protein_coding	chr19	-	NM_000894	49519237	49520347	40	19q13.32	3972	NM_000894	RefSeq	Homo sapiens luteinizing hormone beta polypeptide (LHB), mRNA.	NM_000894	P01229	NM_000894	Hs.154704	brain| embryonic tissue| pituitary gland| placenta| germ cell tumor| leukemia| normal| fetus| adult	NM_000894	GO:0006701	progesterone biosynthetic process	traceable author statement	NM_000894	GO:0005576	extracellular region	traceable author statement	NM_000894	GO:0005102	receptor binding	traceable author statement				ENST00000221421	Pfam	IPR006208	Glycoprotein hormone subunit beta, cystine knot	5.66655	5.73827	5.67053	5.5282
TC19002179.hg.1	4.00638	3.62597	1.30172	up	5.549e-05	0.0472208	DACT3-AS1	BC043434	DACT3 antisense RNA 1	antisense	chr19	+	BC043434	47163621	47180704	80		100506068	BC043434	NONCODE	accn=BC043434 class=mRNAlike lncRNA name=Human lncRNA ref=JounralRNA transcriptId=1162 cpcScore=-0.8096210 cnci=-0.2346164			BC043434	Hs.434327	brain| connective tissue| lung| testis| germ cell tumor| normal| soft tissue/muscle tissue tumor| fetus| adult																				4.00268	3.98875	4.05545	3.97867
TC20001338.hg.1	4.29784	3.84125	1.37229	up	5.71178e-05	0.0472208	linc-C20orf166	TCONS_00028260-XLOC_013601		ncRNA	chr20	+		61055655	61066245	50			TCONS_00028260-XLOC_013601	Rinn lincRNA	linc-C20orf166 chr20:+:61055654-61066245																									4.27768	4.34623	4.2453	4.32215
TC14001405.hg.1	3.25934	4.17481	-1.88617	down	5.71781e-05	0.0472208	DQ575342	DQ575342	Homo sapiens piRNA piR-43454, complete sequence.	other	chr14	-		88614391	88614421	7			DQ575342	GenBank	Homo sapiens piRNA piR-43454, complete sequence.																									3.33291	3.34645	3.13121	3.22681
TC02004103.hg.1	2.30003	1.68939	1.52693	up	5.77621e-05	0.0472208	AC068490.1	OTTHUMT00000324013	putative novel transcript	ncRNA	chr2	-	OTTHUMT00000324013	22020986	22041928	30			OTTHUMT00000324013	NONCODE	accn=NULL class=mRNAlike lncRNA name=vega lncRNA ref=GENCODE transcriptId=OTTHUMT00000324013 cpcScore=-1.0838100 cnci=-0.2502968 gene:OTTHUMG00000151805																									2.32458	2.44208	2.09815	2.3353
TC14000184.hg.1	3.31121	2.85007	1.37663	up	5.80787e-05	0.0472208	FOXG1	NM_005249	forkhead box G1	protein_coding	chr14	+	NM_005249	29235050	29239479	30	14q13	2290	NM_005249	RefSeq	Homo sapiens forkhead box G1 (FOXG1), mRNA.	NM_005249	P55316	NM_005249	Hs.632336	brain| testis| normal| fetus	NM_005249	GO:0002052	positive regulation of neuroblast proliferation	inferred from electronic annotation	NM_005249	GO:0005634	nucleus	inferred from electronic annotation	NM_005249	GO:0003677	DNA binding	traceable author statement				ENST00000313071	Pfam	IPR001766	Transcription factor, fork head	3.27834	3.21977	3.38478	3.36194
TC10001549.hg.1	8.50048	7.76875	1.66063	up	5.81166e-05	0.0472208	PDLIM1	NM_020992	PDZ and LIM domain 1	protein_coding	chr10	-	NM_020992	96997329	97050781	140	10q23.1	9124	NM_020992	RefSeq	Homo sapiens PDZ and LIM domain 1 (PDLIM1), mRNA.	NM_020992	O00151	NM_020992	Hs.368525	adipose tissue| adrenal gland| ascites| bladder| blood| bone| bone marrow| brain| cervix| connective tissue| embryonic tissue| esophagus| eye| heart| intestine| kidney| larynx| liver| lung| lymph node| mammary gland| mouth| muscle| nerve| ovary| pancreas| parathyroid| pharynx| placenta| prostate| salivary gland| skin| spleen| stomach| testis| thymus| thyroid| tonsil| umbilical cord| uterus| vascu…	NM_020992	GO:0001666	response to hypoxia	inferred from electronic annotation	NM_020992	GO:0005667	transcription factor complex	inferred from electronic annotation	NM_020992	GO:0003713	transcription coactivator activity	inferred from electronic annotation				ENST00000329399	Pfam	IPR001478	PDZ domain	8.5457	8.40793	8.2511	8.79716
TC07003142.hg.1	2.49832	3.5418	-2.06119	down	5.85461e-05	0.0472208	linc-NDUFA5-2	TCONS_00013943-XLOC_006588		ncRNA	chr7	-		123315994	123319730	30			TCONS_00013943-XLOC_006588	Rinn lincRNA	linc-NDUFA5-2 chr7:-:123315993-123319730																									2.902	2.25524	2.46598	2.37006
TC02003974.hg.1	3.96111	3.49567	1.38074	up	5.85823e-05	0.0472208	linc-TMEM18-13	TCONS_00003150-XLOC_001942		ncRNA	chr2	-		1624282	1629191	30			TCONS_00003150-XLOC_001942	Rinn lincRNA	linc-TMEM18-13 chr2:-:1624281-1629191																									3.94125	3.92707	4.00003	3.97611
TC01005678.hg.1	2.78927	2.4088	1.30177	up	5.97126e-05	0.0472208	linc_luo_1476	linc_luo_1476		ncRNA	chr1	-		105000979	105010729	30			linc_luo_1476	NONCODE	accn=NULL class=lincRNA name=Human lincRNA ref=Scripture Reconstruction LincRNAs By Luo transcriptId=linc_luo_1476 cpcScore=-1.6642800 cnci=-0.3292174																									2.78159	2.84342	2.82067	2.7114
TC09001950.hg.1	4.10551	5.65494	-2.92702	down	6.04866e-05	0.0472208	linc-ANKRD20A1-14	TCONS_00015680-XLOC_007365		ncRNA	chr9	+		45484572	45488153	30			TCONS_00015680-XLOC_007365	Rinn lincRNA	linc-ANKRD20A1-14 chr9:+:45484571-45488153																									4.80369	4.00461	4.15355	3.46019
TC02004034.hg.1	2.25006	3.29737	-2.06667	down	6.1642e-05	0.0472208	LOC285147	AK094521	uncharacterized LOC285147	unknown	chr2	-	AK094521	8861264	8862816	30	2p25.2	285147	AK094521	NONCODE	accn=AK094521 class=mRNAlike lncRNA name=Human lncRNA ref=JounralRNA transcriptId=1060 cpcScore=-0.8703460 cnci=-0.3010835			AK094521	Hs.467627	adipose tissue| brain| ear| eye| kidney| non-neoplasia| normal| fetus| adult																				2.59302	2.15526	2.22228	2.02969
TC06000914.hg.1	3.30665	2.78946	1.43116	up	6.24322e-05	0.0472208	Mir_584	uc021zec.1		other	chr6	+		114743163	114743280	30			uc021zec.1	UCSC Genes	Rfam model RF01016 hit found at contig region AL021327.1/31679-31562																									3.29808	3.10856	3.44086	3.37908
TC04000182.hg.1	4.22094	4.73592	-1.42897	down	6.35471e-05	0.0472208	TBC1D19	NM_018317	TBC1 domain family, member 19	protein_coding	chr4	+	NM_018317	26578059	26756973	320	4p15.2	55296	NM_018317	RefSeq	Homo sapiens TBC1 domain family, member 19 (TBC1D19), transcript variant 1, mRNA.	NM_018317	Q8N5T2	NM_018317	Hs.479403	adrenal gland| bladder| brain| embryonic tissue| eye| kidney| liver| lung| lymph node| muscle| ovary| parathyroid| placenta| prostate| testis| thymus| uterus| vascular| chondrosarcoma| gastrointestinal tumor| germ cell tumor| glioma| leukemia| liver tumor| normal| ovarian tumor| prostate cancer|embryoid body| blastocyst| fetus| adult	NM_018317	GO:0032851	positive regulation of Rab GTPase activity	inferred from electronic annotation					NM_018317	GO:0005097	Rab GTPase activator activity	inferred from electronic annotation				ENST00000264866	Pfam	IPR000195	Rab-GTPase-TBC domain	4.32057	4.22698	4.17985	4.15635
TC13000474.hg.1	3.58697	4.15511	-1.48261	down	6.38665e-05	0.0472208	MICU2	NM_152726	mitochondrial calcium uptake 2	protein_coding	chr13	-	NM_152726	22066828	22178355	221	13q12.11	221154	NM_152726	RefSeq	Homo sapiens mitochondrial calcium uptake 2 (MICU2), mRNA.	NM_152726	Q8IYU8	NM_152726	Hs.412103	adrenal gland| blood| bone| bone marrow| brain| cervix| connective tissue| ear| embryonic tissue| eye| heart| intestine| kidney| larynx| liver| lung| lymph| lymph node| mammary gland| mouth| muscle| nerve| ovary| pancreas| parathyroid| pituitary gland| placenta| prostate| skin| stomach| testis| thymus| thyroid| uterus| vascular|adrenal tumor| breast (mammary gland) tumor| cervical tumor| chondros…	NM_152726	GO:0006851	mitochondrial calcium ion transport	inferred from direct assay	NM_152726	GO:0005739	mitochondrion	inferred from sequence or structural similarity	NM_152726	GO:0005509	calcium ion binding	inferred from electronic annotation								3.64626	3.72234	3.60659	3.3727
TC03003320.hg.1	5.36694	6.42145	-2.07702	down	6.40838e-05	0.0472208	NFKBIZ	NM_001005474	nuclear factor of kappa light polypeptide gene enhancer in B-cells inhibitor, zeta	protein_coding	chr3	+	NM_001005474	101546834	101579869	267	3p12-q12	64332	NM_001005474	RefSeq	Homo sapiens nuclear factor of kappa light polypeptide gene enhancer in B-cells inhibitor, zeta (NFKBIZ), transcript variant 2, mRNA.	NM_001005474	Q9BYH8	NM_001005474	Hs.319171	adipose tissue| blood| bone| bone marrow| brain| connective tissue| embryonic tissue| esophagus| eye| heart| intestine| kidney| larynx| liver| lung| lymph node| mammary gland| mouth| muscle| ovary| pancreas| pharynx| pituitary gland| placenta| salivary gland| skin| spleen| stomach| testis| thymus| thyroid| trachea| uterus| bladder carcinoma| breast (mammary gland) tumor| chondrosarcoma| colorecta…	NM_001005474	GO:0006351	transcription, DNA-templated	inferred from electronic annotation	NM_001005474	GO:0005634	nucleus	inferred from electronic annotation	ENST00000326151	GO:0005515	protein binding	inferred from electronic annotation				ENST00000326151	Pfam	IPR002110	Ankyrin repeat	5.83927	5.48537	4.93926	5.20384
TC01001088.hg.1	3.74996	3.03129	1.64566	up	6.60217e-05	0.0472208	TRNA_Asn	uc021ous.1		other	chr1	+		145385729	145385804	30			uc021ous.1	UCSC Genes	transfer RNA Asn (anticodon GTT)																									3.51648	3.6331	4.08614	3.7641
TC01001685.hg.1	7.25766	8.27833	-2.02886	down	6.64484e-05	0.0472208	BTG2	NM_006763	BTG family, member 2	protein_coding	chr1	+	NM_006763	203274619	203278730	78	1q32	7832	NM_006763	RefSeq	Homo sapiens BTG family, member 2 (BTG2), mRNA.	NM_006763	P78543	NM_006763	Hs.519162	adipose tissue| ascites| bladder| blood| bone| bone marrow| brain| cervix| connective tissue| embryonic tissue| esophagus| eye| heart| intestine| kidney| larynx| liver| lung| lymph| lymph node| mammary gland| mouth| muscle| nerve| ovary| pancreas| parathyroid| pharynx| pituitary gland| placenta| prostate| salivary gland| skin| spleen| stomach| testis| thymus| thyroid| tonsil| uterus| bladder carc…	NM_006763	GO:0006281	DNA repair	traceable author statement	NM_006763	GO:0070062	extracellular vesicular exosome	inferred from direct assay	NM_006763	GO:0001077	RNA polymerase II core promoter proximal region sequence-specific DNA binding transcription factor activity involved in positive regulation of transcription	inferred from electronic annotation				ENST00000290551	Pfam	IPR002087	Anti-proliferative protein	7.06612	7.48801	7.20776	7.26873
TC17000317.hg.1	5.30122	4.81467	1.4011	up	6.72478e-05	0.0472208	PYY2	NR_003064	peptide YY, 2 (pseudogene)	pseudogene	chr17	+	NR_003064	26553589	26555091	30	17q11	23615	NR_003064	RefSeq	Homo sapiens peptide YY, 2 (pseudogene) (PYY2), non-coding RNA.	NR_003064	Q9NRI6	NR_003064	Hs.157195	larynx| lung| testis| germ cell tumor| head and neck tumor| normal| fetus| adult					NR_003064	GO:0005576	extracellular region	inferred from electronic annotation												5.23554	5.22029	5.39444	5.35464
TC02000142.hg.1	3.80768	3.2888	1.43284	up	6.85686e-05	0.0472208	AC012457.2	OTTHUMT00000324840	putative novel transcript	other	chr2	+	OTTHUMT00000324840	25427182	25432071	30			OTTHUMT00000324840	Havana transcript	cdna:all chromosome:VEGA56:2:25204313:25209202:1 Gene:OTTHUMG00000152010			ENST00000431650	Hs.580474	germ cell tumor																				3.95672	3.6845	3.78238	3.80709
TC12002265.hg.1	4.21035	3.63125	1.49392	up	6.89741e-05	0.0472208	RERG-AS1	ENST00000541243	RERG antisense RNA 1	ncRNA	chr12	+	ENST00000541243	15304857	15308217	30	12p12.3	100873980	ENST00000541243	NONCODE	accn=NULL class=lncRNA name= ref=EnsemblNoncode transcriptId=ENST00000541243 cpcScore=-1.4938300 cnci=-0.2877332 gene:ENSG00000255660			ENST00000541243	Hs.569154	kidney| normal																				4.23152	4.12311	4.26798	4.21877
TC19002542.hg.1	7.01824	6.51599	1.41643	up	7.01636e-05	0.0472208	PTH2	AY048588	parathyroid hormone 2	protein_coding	chr19	-	AY048588	49925772	49926599	30	19q13.33	113091	AY048588	NONCODE	accn=AY048588 class=mRNAlike lncRNA name=NULL ref=H-invitational v7.5 transcriptId=HIT000083821 cpcScore=0.5102170 cnci=-0.0095144	AY048588	Q96A98	AY048588	Hs.339845		AY048588	GO:0007218	neuropeptide signaling pathway	inferred from electronic annotation	AY048588	GO:0005576	extracellular region	traceable author statement												6.92264	6.99431	7.12215	7.03387
TC20000995.hg.1	2.90639	2.21029	1.62011	up	7.04448e-05	0.0472208	RP4-614C15.2	OTTHUMT00000268118	putative novel transcript	ncRNA	chr20	-	OTTHUMT00000268118	57927250	57932829	30			OTTHUMT00000268118	Havana transcript	cdna:all chromosome:VEGA56:20:59352195:59357774:-1 Gene:OTTHUMG00000137387																									2.75449	2.94729	2.65698	3.26678
TC02004283.hg.1	4.00776	3.37062	1.55524	up	7.0482e-05	0.0472208	AL355732	AL355732		ncRNA	chr2	-		64530721	64568782	20			AL355732	NONCODE	accn=AL355732 class=mRNAlike lncRNA name=Human lncRNA ref=JounralRNA transcriptId=1286 cpcScore=2.4086500 cnci=-0.2114336			AL355732	Hs.404304	normal| fetus																				4.12049	4.10424	3.79261	4.01369
TC01001629.hg.1	3.18176	2.72031	1.37693	up	7.06817e-05	0.0472208	RP11-21J7.1	OTTHUMT00000086762	novel transcript	ncRNA	chr1	+	OTTHUMT00000086762	193648024	193696313	30			OTTHUMT00000086762	Havana transcript	cdna:all chromosome:VEGA56:1:193678894:193727035:1 Gene:OTTHUMG00000035690																									3.19399	3.15007	3.2359	3.14708
TC14001085.hg.1	4.2003	4.88424	-1.60652	down	7.07262e-05	0.0472208	MIS18BP1	NM_018353	MIS18 binding protein 1	protein_coding	chr14	-	NM_018353	45672393	45722743	305	14q21.2	55320	NM_018353	RefSeq	Homo sapiens MIS18 binding protein 1 (MIS18BP1), mRNA.	NM_018353	Q6P0N0	NM_018353	Hs.732769	adrenal gland| ascites| bladder| blood| bone| bone marrow| brain| cervix| connective tissue| embryonic tissue| heart| intestine| kidney| liver| lung| lymph| lymph node| mammary gland| mouth| muscle| nerve| pancreas| pharynx| placenta| prostate| skin| spleen| stomach| testis| thymus| umbilical cord| uterus| vascular|adrenal tumor| bladder carcinoma| cervical tumor| chondrosarcoma| colorectal tumor…	NM_018353	GO:0006334	nucleosome assembly	traceable author statement	NM_018353	GO:0000775	chromosome, centromeric region	inferred from electronic annotation	NM_018353	GO:0003677	DNA binding	inferred from electronic annotation				ENST00000310806	Pfam	IPR015216	SANT associated	4.27837	4.245	4.20638	4.07144
TC03000395.hg.1	3.75432	4.64445	-1.85334	down	7.1116e-05	0.0472208	PSMD6-AS2	NR_038286	PSMD6 antisense RNA 2	antisense	chr3	+	NR_038286	63989698	64001922	70	3p14	100507062	NR_038286	RefSeq	Homo sapiens PSMD6 antisense RNA 2 (PSMD6-AS2), long non-coding RNA.			NR_038286	Hs.593613	bone marrow| embryonic tissue| liver| lung| lymph node| mammary gland| ovary| placenta| prostate| testis| thyroid| uterus| head and neck tumor| normal| ovarian tumor| fetus| adult																				4.13547	3.65976	3.62449	3.59755
TC17001022.hg.1	5.45907	4.98898	1.38519	up	7.16039e-05	0.0472208	AC118754.4	OTTHUMT00000256469	novel transcript	antisense	chr17	-	OTTHUMT00000256469	4400689	4402969	30			OTTHUMT00000256469	Havana transcript	cdna:all chromosome:VEGA56:17:4497394:4499674:-1 Gene:OTTHUMG00000132937			ENST00000416958	Hs.513878	brain| glioma																				5.38072	5.48736	5.50411	5.46409
TC08000805.hg.1	4.64866	4.10921	1.45342	up	7.30324e-05	0.0472208	RP13-467H17.1	OTTHUMT00000380686	novel transcript, antisense to TSNARE1	antisense	chr8	+	OTTHUMT00000380686	143485013	143488389	30			OTTHUMT00000380686	Havana transcript	cdna:all chromosome:VEGA56:8:142403652:142407028:1 Gene:OTTHUMG00000164869																									4.52595	4.56625	4.61038	4.89205
TC09001981.hg.1	4.78725	5.28746	-1.41442	down	7.37539e-05	0.0472208	linc_luo_1447	linc_luo_1447		ncRNA	chr9	+		69065461	69130929	277			linc_luo_1447	NONCODE	accn=NULL class=lincRNA name=Human lincRNA ref=Scripture Reconstruction LincRNAs By Luo transcriptId=linc_luo_1447 cpcScore=-1.3116400 cnci=-0.2568581																									4.94902	4.83347	4.6555	4.71103
TC14001636.hg.1	6.89307	7.69287	-1.74086	down	7.39688e-05	0.0472208	ARHGAP5	AY316523	Rho GTPase activating protein 5	protein_coding	chr14	+	AY316523	32563312	32586481	30	14q12	394	AY316523	NONCODE	accn=AY316523 class=mRNAlike lncRNA name=NULL ref=H-invitational v7.5 transcriptId=HIT000251697 cpcScore=2.7587700 cnci=-0.4115377	AY316523	Q7Z2X2	AY316523	Hs.592313	adipose tissue| ascites| bladder| blood| bone| bone marrow| brain| cervix| connective tissue| ear| embryonic tissue| esophagus| eye| heart| intestine| kidney| larynx| liver| lung| mammary gland| mouth| muscle| nerve| ovary| pancreas| pharynx| pituitary gland| placenta| prostate| salivary gland| skin| spleen| stomach| testis| thymus| thyroid| trachea| uterus| vascular| bladder carcinoma| breast (m…	AY316523	GO:0002053	positive regulation of mesenchymal cell proliferation	inferred from electronic annotation	AY316523	GO:0005737	cytoplasm	traceable author statement	AY316523	GO:0003924	GTPase activity	traceable author statement								6.83916	6.61336	6.94399	7.17577
TC19000186.hg.1	5.9355	5.35698	1.49331	up	7.41234e-05	0.0472208	MIR4748	NR_039903	microRNA 4748	miRNA	chr19	+	NR_039903	10890930	10891011	30		100616425	NR_039903	RefSeq	Homo sapiens microRNA 4748 (MIR4748), microRNA.																									5.95176	5.95483	5.98491	5.85049
TC02003262.hg.1	2.87165	3.72145	-1.80224	down	7.54524e-05	0.0476182	linc_luo_1076	linc_luo_1076		ncRNA	chr2	+		61157161	61167156	54			linc_luo_1076	NONCODE	accn=NULL class=lincRNA name=Human lincRNA ref=Scripture Reconstruction LincRNAs By Luo transcriptId=linc_luo_1076 cpcScore=-1.2688800 cnci=-0.3730511																									2.70764	2.96915	2.90103	2.9088
TC02000700.hg.1	3.92832	3.25139	1.59873	up	7.81897e-05	0.0488889	AC017002.4	OTTHUMT00000332150	putative novel transcript	ncRNA	chr2	+	OTTHUMT00000332150	112365418	112370095	30			OTTHUMT00000332150	Havana transcript	cdna:all chromosome:VEGA56:2:111607841:111612518:1 Gene:OTTHUMG00000153696			ENST00000426124	Hs.208145	normal| fetus																				3.76821	3.9324	4.109	3.90368
TC03002001.hg.1	4.92447	5.35604	-1.34871	down	8.05006e-05	0.0493631	PLD1	NM_001130081	phospholipase D1, phosphatidylcholine-specific	protein_coding	chr3	-	NM_001130081	171318195	171528740	490	3q26	5337	NM_001130081	RefSeq	Homo sapiens phospholipase D1, phosphatidylcholine-specific (PLD1), transcript variant 2, mRNA.	NM_001130081	Q13393	NM_001130081	Hs.382865	adrenal gland| blood| bone| bone marrow| brain| cervix| connective tissue| esophagus| eye| heart| intestine| kidney| liver| lung| mammary gland| mouth| muscle| ovary| pharynx| placenta| skin| testis| thyroid| trachea| uterus| vascular|adrenal tumor| breast (mammary gland) tumor| cervical tumor| chondrosarcoma| colorectal tumor| esophageal tumor| germ cell tumor| head and neck tumor| leukemia| lun…	NM_001130081	GO:0006644	phospholipid metabolic process	traceable author statement	NM_001130081	GO:0000139	Golgi membrane	inferred from electronic annotation	NM_001130081	GO:0004630	phospholipase D activity	inferred from electronic annotation	NM_002662	HumanCyc	PWY-3561	ENST00000356327	Pfam	IPR001683	Phox homologous domain	4.85099	4.931	4.98729	4.92858
TC05000335.hg.1	6.8935	3.75091	8.83109	up	8.05287e-05	0.0493631	CARTPT	NM_004291	CART prepropeptide	protein_coding	chr5	+	NM_004291	71014990	71016875	50	5q13.2	9607	NM_004291	RefSeq	Homo sapiens CART prepropeptide (CARTPT), mRNA.	NM_004291	Q16568	NM_004291	Hs.1707	adrenal gland| brain| eye| lung| pituitary gland| prostate| testis|adrenal tumor| glioma| normal| fetus| adult	NM_004291	GO:0000186	activation of MAPKK activity	inferred from sequence or structural similarity	NM_004291	GO:0005615	extracellular space	inferred from direct assay	NM_004291	GO:0005515	protein binding	inferred from physical interaction				ENST00000296777	Pfam	IPR009106	CART satiety factor	6.59832	6.39026	7.30208	7.28335
TC11001691.hg.1	3.7369	2.32605	2.65895	up	8.11412e-05	0.0493631	DQ593189	DQ593189	Homo sapiens piRNA piR-33301, complete sequence.	other	chr11	-		45740015	45740043	5			DQ593189	GenBank	Homo sapiens piRNA piR-33301, complete sequence.																									3.91179	3.81285	3.60596	3.61701
TC0X001259.hg.1	4.50717	5.02322	-1.43004	down	8.46074e-05	0.0499159	RBM41	NM_001171080	RNA binding motif protein 41	protein_coding	chrX	-	NM_001171080	106305118	106362057	229	Xq22.3	55285	NM_001171080	RefSeq	Homo sapiens RNA binding motif protein 41 (RBM41), transcript variant 2, mRNA.	NM_001171080	Q96IZ5	NM_001171080	Hs.139053	bladder| bone| bone marrow| brain| cervix| embryonic tissue| esophagus| eye| intestine| kidney| liver| lung| lymph node| mammary gland| mouth| muscle| ovary| pancreas| pituitary gland| placenta| prostate| skin| stomach| testis| thymus| thyroid| trachea| uterus| vascular| bladder carcinoma| breast (mammary gland) tumor| cervical tumor| chondrosarcoma| colorectal tumor| esophageal tumor| gastrointe…									NM_001171080	GO:0000166	nucleotide binding	inferred from electronic annotation				ENST00000372479	Pfam	IPR000504	RNA recognition motif domain	4.56824	4.40155	4.54877	4.51011
TC19000323.hg.1	5.97141	5.47408	1.4116	up	8.60094e-05	0.0499159	TMEM38A	NM_024074	transmembrane protein 38A	protein_coding	chr19	+	NM_024074	16771938	16799816	70	19p13.11	79041	NM_024074	RefSeq	Homo sapiens transmembrane protein 38A (TMEM38A), mRNA.	NM_024074	Q9H6F2	NM_024074	Hs.436068	brain| eye| heart| intestine| kidney| larynx| liver| lymph| mammary gland| muscle| ovary| prostate| testis| breast (mammary gland) tumor| colorectal tumor| germ cell tumor| head and neck tumor| kidney tumor| lymphoma| normal| ovarian tumor| prostate cancer| retinoblastoma| fetus| infant| adult	NM_024074	GO:0071805	potassium ion transmembrane transport	inferred from electronic annotation	NM_024074	GO:0016021	integral component of membrane	inferred from electronic annotation	NM_024074	GO:0005267	potassium channel activity	traceable author statement				ENST00000187762	Pfam	IPR007866	TRIC channel	5.77657	5.99775	5.93231	6.17902
TC16000733.hg.1	5.80955	5.2703	1.45322	up	8.66183e-05	0.0499159	AL022341.3	OTTHUMT00000109344	novel transcript	antisense	chr16	-	OTTHUMT00000109344	698473	699200	30			OTTHUMT00000109344	Havana transcript	cdna:all chromosome:VEGA56:16:648473:649200:-1 Gene:OTTHUMG00000048041																									5.87331	5.67204	5.82769	5.86517
TC21000527.hg.1	6.1727	5.81261	1.2835	up	8.73714e-05	0.0499159	KRTAP10-1	NM_198691	keratin associated protein 10-1	protein_coding	chr21	-	NM_198691	45958864	45960078	57	21q22.3	386677	NM_198691	RefSeq	Homo sapiens keratin associated protein 10-1 (KRTAP10-1), mRNA.	NM_198691	P60331	NM_198691	Hs.688631						NM_198691	GO:0045095	keratin filament	inferred from electronic annotation												6.10783	6.19298	6.2257	6.16429
TC01001104.hg.1	3.45178	3.00378	1.36415	up	8.76454e-05	0.0499159	AL049742.2	ENST00000512265		other	chr1	+		146086591	146088636	30			ENST00000512265	ENSEMBL	[retired] ncrna:lincRNA chromosome:GRCh37:1:146086591:146088636:1 gene:ENSG00000249788																									3.46407	3.44941	3.40544	3.48821
TC19001621.hg.1	5.71368	6.54331	-1.77722	down	8.77495e-05	0.0499159	ENST00000501583	ENST00000501583		ncRNA	chr19	-		45976341	45978414	19			ENST00000501583	NONCODE	accn=NULL class=lncRNA name= ref=EnsemblNoncode transcriptId=ENST00000501583 cpcScore=-1.1092200 cnci=-0.1697273																									5.77436	5.87744	5.52776	5.67518
TC14000763.hg.1	5.58297	5.06508	1.43186	up	8.83094e-05	0.0499159	Mir_154	uc021sdu.1		other	chr14	+		101532771	101532849	30			uc021sdu.1	UCSC Genes	Rfam model RF00641 hit found at contig region AL132709.5/55165-55087																									5.70096	5.53315	5.57416	5.52361
TC0X001625.hg.1	5.37458	6.33175	-1.9415	down	8.90307e-05	0.0499159	EIF2S3	AF274932	eukaryotic translation initiation factor 2, subunit 3 gamma, 52kDa	protein_coding	chrX	+	AF274932	24096519	24096950	30	Xp22.2-p22.1	1968	AF274932	NONCODE	accn=AF274932 class=mRNAlike lncRNA name=NULL ref=H-invitational v7.5 transcriptId=HIT000075889 cpcScore=-1.2614900 cnci=-0.5580548	AF274932	P41091	AF274932	Hs.539684	ascites| bladder| blood| bone| bone marrow| brain| cervix| connective tissue| embryonic tissue| esophagus| eye| heart| intestine| kidney| liver| lung| lymph| lymph node| mammary gland| mouth| muscle| ovary| pancreas| parathyroid| pharynx| placenta| prostate| salivary gland| skin| spleen| stomach| testis| thymus| thyroid| trachea| umbilical cord| uterus| vascular| breast (mammary gland) tumor| cer…	AF274932	GO:0006184	GTP catabolic process	inferred from electronic annotation	AF274932	GO:0005829	cytosol	traceable author statement	AF274932	GO:0003743	translation initiation factor activity	inferred from direct assay	AF274932	GenMAPP	Translation_Factors					5.09373	5.4645	5.5028	5.43727
TC07001962.hg.1	5.12027	4.60137	1.43286	up	8.97749e-05	0.0499159	TRBV30	ENST00000417977	T cell receptor beta variable 30 (gene/pseudogene)	protein_coding	chr7	-	ENST00000417977	142510271	142511084	30			ENST00000417977	ENSEMBL	havana_ig_gene:known chromosome:GRCh38:7:142812586:142813399:-1 gene:ENSG00000237254 gene_biotype:TR_V_gene transcript_biotype:TR_V_gene	ENST00000417977	A0A5C0	AB305913	Hs.449262	connective tissue| tonsil| normal| soft tissue/muscle tissue tumor| adult									ENST00000417977	GO:0005515	protein binding	inferred from electronic annotation				ENST00000417977	Pfam	IPR013106	Immunoglobulin V-set domain	4.96105	5.13419	5.25819	5.12765
TC05002434.hg.1	10.9384	10.3403	1.51378	up	9.00705e-05	0.0499159	MAP1B	BC032516	microtubule-associated protein 1B	protein_coding	chr5	+	BC032516	71403313	71491128	60	5q13	4131	BC032516	NONCODE	accn=BC032516 class=mRNAlike lncRNA name=Human lncRNA ref=JounralRNA transcriptId=2954 cpcScore=13.3349000 cnci=-0.2907612	BC032516	Q05BW8	BC032516	Hs.335079	adipose tissue| adrenal gland| bladder| blood| bone| bone marrow| brain| connective tissue| ear| embryonic tissue| esophagus| eye| heart| intestine| kidney| larynx| liver| lung| lymph node| mammary gland| muscle| nerve| ovary| pancreas| pituitary gland| placenta| prostate| salivary gland| skin| spleen| stomach| testis| trachea| umbilical cord| uterus| vascular| breast (mammary gland) tumor| chond…	BC032516	GO:0001578	microtubule bundle formation	inferred from electronic annotation	BC032516	GO:0005737	cytoplasm	inferred from direct assay	BC032516	GO:0005198	structural molecule activity	non-traceable author statement								10.8228	10.8802	10.9564	11.0942
TC17001634.hg.1	4.73385	4.3097	1.34179	up	9.07644e-05	0.0499159	MIR152	NR_029687	microRNA 152	miRNA	chr17	-	NR_029687	46114527	46114613	30	17q21.32	406943	NR_029687	RefSeq	Homo sapiens microRNA 152 (MIR152), microRNA.																									4.7571	4.78376	4.69813	4.69642
TC06001134.hg.1	4.80985	3.35044	2.74996	up	9.09202e-05	0.0499159	DQ581726	DQ581726	Homo sapiens piRNA piR-49838, complete sequence.	other	chr6	+		158981119	158981146	4			DQ581726	GenBank	Homo sapiens piRNA piR-49838, complete sequence.																									4.38462	4.99168	5.01689	4.84622
TC17000502.hg.1	5.3809	5.0215	1.28289	up	9.18667e-05	0.0500288	KRTAP4-9	NM_001146041	keratin associated protein 4-9	protein_coding	chr17	+	NM_001146041	39240402	39262740	104	17q21.2	100132386	NM_001146041	RefSeq	Homo sapiens keratin associated protein 4-9 (KRTAP4-9), mRNA.	NM_001146041	Q9BYQ8	NM_001146041	Hs.307018	normal	NM_001146041	GO:0007568	aging	inferred from direct assay	NM_001146041	GO:0045095	keratin filament	inferred from electronic annotation								ENST00000391415	Pfam	IPR002494	Keratin-associated protein	5.35605	5.35367	5.40177	5.41211
TC09002637.hg.1	5.06827	4.54908	1.43314	up	9.7303e-05	0.0521123	SHC3	D84361	SHC (Src homology 2 domain containing) transforming protein 3	protein_coding	chr9	-	D84361	91628167	91793555	120	9q22.1	53358	D84361	NONCODE	accn=D84361 class=mRNAlike lncRNA name=Human lncRNA ref=JounralRNA transcriptId=5373 cpcScore=11.1520000 cnci=-0.0619671	D84361	Q92529	D84361	Hs.292737	adrenal gland| blood| brain| connective tissue| embryonic tissue| eye| heart| intestine| kidney| lung| muscle| ovary| pancreas| placenta| skin| chondrosarcoma| colorectal tumor| germ cell tumor| glioma| leukemia| non-neoplasia| normal| ovarian tumor| pancreatic tumor| primitive neuroectodermal tumor of the CNS| soft tissue/muscle tissue tumor|embryoid body| fetus| infant| adult	D84361	GO:0007169	transmembrane receptor protein tyrosine kinase signaling pathway	traceable author statement	D84361	GO:0005829	cytosol	traceable author statement	D84361	GO:0004871	signal transducer activity	traceable author statement	D84361	GenMAPP	Integrin-mediated_cell_adhesion_KEGG					5.10155	5.08849	4.99968	5.08334
TC02000474.hg.1	2.78962	2.32058	1.38418	up	9.77203e-05	0.0521123	U3	ENST00000408711		snoRNA	chr2	+		75855079	75855293	30			ENST00000408711	ENSEMBL	ncrna:novel chromosome:GRCh38:2:75627950:75628168:1 gene:ENSG00000221638 gene_biotype:snoRNA transcript_biotype:snoRNA																									2.66789	2.761	2.82479	2.90478
TC05003160.hg.1	5.92469	7.14982	-2.33777	down	9.90532e-05	0.0521123	CHD1	BC054860	chromodomain helicase DNA binding protein 1	protein_coding	chr5	-	BC054860	98236855	98262221	50	5q15-q21	1105	BC054860	NONCODE	accn=BC054860 class=mRNAlike lncRNA name=NULL ref=H-invitational v7.5 transcriptId=HIT000259462 cpcScore=0.5295520 cnci=-0.3920313	BC054860	Q7Z4M7	BC054860	Hs.643465	bladder| blood| bone| bone marrow| brain| cervix| connective tissue| embryonic tissue| esophagus| eye| heart| intestine| kidney| larynx| liver| lung| lymph node| mammary gland| muscle| nerve| ovary| pancreas| pharynx| pituitary gland| placenta| prostate| skin| stomach| testis| thymus| thyroid| uterus| vascular| bladder carcinoma| breast (mammary gland) tumor| cervical tumor| chondrosarcoma| color…	BC054860	GO:0006338	chromatin remodeling	inferred from electronic annotation	BC054860	GO:0005634	nucleus	inferred from electronic annotation	BC054860	GO:0003677	DNA binding	inferred from electronic annotation								5.90455	6.0086	5.97278	5.81283
TC02003848.hg.1	4.60191	4.14662	1.37106	up	0.000100051	0.0521123	linc-CCDC140-10	TCONS_00004031-XLOC_001869		ncRNA	chr2	+		220603493	220607703	19			TCONS_00004031-XLOC_001869	Rinn lincRNA	linc-CCDC140-10 chr2:+:220603492-220607703																									4.6621	4.69957	4.61767	4.42832
TC12001237.hg.1	2.07275	2.95095	-1.83808	down	0.000101218	0.0521123	TAS2R20	NM_176889	taste receptor, type 2, member 20	protein_coding	chr12	-	NM_176889	11148561	11150474	30	12p13.2	259295	NM_176889	RefSeq	Homo sapiens taste receptor, type 2, member 20 (TAS2R20), mRNA.	NM_176889	P59543	NM_176889	Hs.686384	eye| skin| normal| adult	NM_176889	GO:0007186	G-protein coupled receptor signaling pathway	inferred from electronic annotation	NM_176889	GO:0005886	plasma membrane	traceable author statement	NM_176889	GO:0004930	G-protein coupled receptor activity	inferred from electronic annotation				ENST00000538986	Pfam	IPR007960	Mammalian taste receptor	2.25869	2.23196	2.02845	1.77189
TC06003180.hg.1	2.62849	3.90983	-2.43065	down	0.000101312	0.0521123	RP5-826L7.1	OTTHUMT00000043019	putative novel transcript	ncRNA	chr6	+	OTTHUMT00000043019	163927605	163929187	30			OTTHUMT00000043019	NONCODE	accn=NULL class=mRNAlike lncRNA name=vega lncRNA ref=GENCODE transcriptId=OTTHUMT00000043019 cpcScore=-0.8874050 cnci=-0.4717934 gene:OTTHUMG00000015978																									3.189	2.83337	2.45513	2.03644
TC06001551.hg.1	4.81357	4.33379	1.39453	up	0.000102602	0.0521123	ZBTB12	NM_181842	zinc finger and BTB domain containing 12	protein_coding	chr6	-	NM_181842	31867384	31869769	30	6p21.33	221527	NM_181842	RefSeq	Homo sapiens zinc finger and BTB domain containing 12 (ZBTB12), mRNA.	NM_181842	Q9Y330	NM_181842	Hs.234027	embryonic tissue| intestine| bladder carcinoma| colorectal tumor| normal|embryoid body| adult	NM_181842	GO:0006351	transcription, DNA-templated	inferred from electronic annotation	NM_181842	GO:0005634	nucleus	inferred from electronic annotation	NM_181842	GO:0003677	DNA binding	inferred from electronic annotation				ENST00000375527	Pfam	IPR007087	Zinc finger, C2H2	4.70705	4.97346	4.80137	4.77241
TC01003848.hg.1	2.26514	1.79679	1.38353	up	0.000104015	0.0521123	LOC101929771	ENST00000431729	uncharacterized LOC101929771	ncRNA	chr1	-	ENST00000431729	222001008	222014008	40		101929771	ENST00000431729	ENSEMBL	havana:known chromosome:GRCh38:1:221827666:221840666:-1 gene:ENSG00000227925 gene_biotype:lincRNA transcript_biotype:lincRNA			ENST00000431729	Hs.557001	mouth| testis| head and neck tumor| normal| adult																				2.09396	2.36931	2.33579	2.2615
TC06001071.hg.1	4.90714	5.56995	-1.58316	down	0.000105495	0.0521123	STXBP5	NM_001127715	syntaxin binding protein 5 (tomosyn)	protein_coding	chr6	+	NM_001127715	147525494	147711612	464	6q24.3	134957	NM_001127715	RefSeq	Homo sapiens syntaxin binding protein 5 (tomosyn) (STXBP5), transcript variant 2, mRNA.	NM_001127715	Q5T5C0	NM_001127715	Hs.86320	bladder| blood| bone| bone marrow| brain| connective tissue| ear| embryonic tissue| esophagus| eye| intestine| kidney| liver| lung| lymph node| mammary gland| mouth| muscle| nerve| ovary| pancreas| parathyroid| placenta| prostate| skin| stomach| testis| thymus| thyroid| trachea| uterus| breast (mammary gland) tumor| chondrosarcoma| colorectal tumor| esophageal tumor| gastrointestinal tumor| germ …	NM_001127715	GO:0006887	exocytosis	inferred from electronic annotation	NM_001127715	GO:0005737	cytoplasm	inferred from direct assay	NM_001127715	GO:0017075	syntaxin-1 binding	inferred from sequence or structural similarity				ENST00000321680	Pfam	IPR001680	WD40 repeat	5.11018	4.91472	4.79841	4.80526
TC05003371.hg.1	4.02674	3.45777	1.48346	up	0.000106006	0.0521123	linc-FAM153A-2	TCONS_00010575-XLOC_005099		ncRNA	chr5	-		177387462	177392855	53			TCONS_00010575-XLOC_005099	Rinn lincRNA	linc-FAM153A-2 chr5:-:177387461-177391278																									3.83062	4.02997	4.01926	4.2271
TC07001957.hg.1	3.3403	2.86351	1.39164	up	0.000106424	0.0521123	TRBV5-3	ENST00000390362	T cell receptor beta variable 5-3 (non-functional)	protein_coding	chr7	-	ENST00000390362	142242281	142242747	30			ENST00000390362	ENSEMBL	havana_ig_gene:known chromosome:GRCh38:7:142389202:142389668:1 gene:ENSG00000211715 gene_biotype:TR_V_gene transcript_biotype:TR_V_gene														ENST00000390362	GO:0005515	protein binding	inferred from electronic annotation				ENST00000390362	Pfam	IPR013106	Immunoglobulin V-set domain	3.47518	3.34908	3.3228	3.21413
TC14000649.hg.1	4.39519	5.43904	-2.06173	down	0.000107488	0.0521123	SNORD112.39	ENST00000516892		other	chr14	+		101315645	101315716	30			ENST00000516892	ENSEMBL	[retired]ncrna:snoRNA chromosome:GRCh37:14:101315645:101315716:1 gene:ENSG00000252701 gene_biotype:snoRNA transcript_biotype:snoRNA																									4.57528	4.54765	4.32356	4.13426
TC07000457.hg.1	5.31511	4.88696	1.3455	up	0.000107663	0.0521123	AC004851.1	ENST00000516569		other	chr7	+		73985677	73985754	30			ENST00000516569	ENSEMBL	ncrna:novel chromosome:GRCh38:7:74571347:74571424:1 gene:ENSG00000252378 gene_biotype:miRNA transcript_biotype:miRNA																									5.37198	5.37749	5.227	5.28395
TC07000485.hg.1	9.7342	9.03862	1.61955	up	0.000108101	0.0521123	HSPB1	NM_001540	heat shock 27kDa protein 1	protein_coding	chr7	+	NM_001540	75931861	75933614	103	7q11.23	3315	NM_001540	RefSeq	Homo sapiens heat shock 27kDa protein 1 (HSPB1), mRNA.	NM_001540	P04792	NM_001540	Hs.520973	adipose tissue| adrenal gland| ascites| bladder| blood| bone| bone marrow| brain| cervix| connective tissue| embryonic tissue| esophagus| eye| heart| intestine| kidney| larynx| liver| lung| lymph| lymph node| mammary gland| mouth| muscle| nerve| ovary| pancreas| parathyroid| pharynx| pituitary gland| placenta| prostate| salivary gland| skin| spleen| stomach| testis| thymus| thyroid| trachea| umbi…					NM_001540	GO:0000502	proteasome complex	inferred from sequence or structural similarity	NM_001540	GO:0005080	protein kinase C binding	inferred from sequence or structural similarity				ENST00000248553	Pfam	IPR002068	Alpha crystallin/Hsp20 domain	9.5431	9.68859	9.74303	9.9621
TC6_qbl_hap6000043.hg.1	3.22439	2.86513	1.28277	up	0.000109537	0.0521123	DPCR1	NM_080870	diffuse panbronchiolitis critical region 1	protein_coding	chr6_qbl_hap6	+	NM_080870	2201750	2214969	74	6p21.33	135656	NM_080870	RefSeq	Homo sapiens diffuse panbronchiolitis critical region 1 (DPCR1), mRNA.	NM_080870	Q3MIW9	NM_080870	Hs.631993	adrenal gland| intestine| pancreas| stomach|adrenal tumor| gastrointestinal tumor| normal| pancreatic tumor| adult					NM_080870	GO:0016021	integral component of membrane	inferred from electronic annotation												3.19791	3.27004	3.2224	3.20723
TC17001375.hg.1	4.99283	4.52485	1.38317	up	0.000110815	0.0521123	GAS2L2	NM_139285	growth arrest-specific 2 like 2	protein_coding	chr17	-	NM_139285	34071530	34079897	100	17q12	246176	NM_139285	RefSeq	Homo sapiens growth arrest-specific 2 like 2 (GAS2L2), mRNA.	NM_139285	Q8NHY3	NM_139285	Hs.591194	lung| ovary| normal| ovarian tumor| fetus| adult	NM_139285	GO:0001578	microtubule bundle formation	inferred from mutant phenotype	NM_139285	GO:0001725	stress fiber	inferred from direct assay	NM_139285	GO:0008017	microtubule binding	inferred from direct assay								4.95918	4.98512	5.00854	5.01849
TC12000732.hg.1	3.82186	3.21366	1.52436	up	0.000110827	0.0521123	MIR492	NR_030171	microRNA 492	miRNA	chr12	+	NR_030171	95228174	95228804	30	12q22	574449	NR_030171	RefSeq	Homo sapiens microRNA 492 (MIR492), microRNA.	NR_036685	A0A4R5	NR_036685	Hs.527883						NR_036685	GO:0005882	intermediate filament	inferred from electronic annotation												4.00045	3.72056	3.88724	3.67919
TC13000514.hg.1	4.18492	3.73227	1.36854	up	0.000111001	0.0521123	URAD	NM_001105577	ureidoimidazoline (2-oxo-4-hydroxy-4-carboxy-5-) decarboxylase	protein_coding	chr13	-	NM_001105577	28552243	28562774	30	13q12.2	646625	NM_001105577	RefSeq	Homo sapiens ureidoimidazoline (2-oxo-4-hydroxy-4-carboxy-5-) decarboxylase (URAD), mRNA.	NM_001105577	A6NGE7	NM_001105577	Hs.705356		NM_001105577	GO:0006144	purine nucleobase metabolic process	inferred from electronic annotation	NM_001105577	GO:0005777	peroxisome	inferred from electronic annotation	NM_001105577	GO:0016831	carboxy-lyase activity	inferred from sequence or structural similarity				ENST00000332715	Pfam	IPR018020	Oxo-4-hydroxy-4-carboxy-5-ureidoimidazoline decarboxylase	4.12696	4.12284	4.15595	4.33392
TC16001174.hg.1	5.19152	5.76704	-1.49022	down	0.000111021	0.0521123	NAE1	NM_001018159	NEDD8 activating enzyme E1 subunit 1	protein_coding	chr16	-	NM_001018159	66836778	66864900	237	16q22	8883	NM_001018159	RefSeq	Homo sapiens NEDD8 activating enzyme E1 subunit 1 (NAE1), transcript variant 2, mRNA.	NM_001018159	Q13564	NM_001018159	Hs.460978	adipose tissue| adrenal gland| ascites| bladder| blood| bone| bone marrow| brain| cervix| connective tissue| embryonic tissue| esophagus| eye| heart| intestine| kidney| liver| lung| lymph| lymph node| mammary gland| muscle| nerve| ovary| pancreas| parathyroid| pharynx| pituitary gland| placenta| prostate| salivary gland| skin| stomach| testis| thymus| trachea| umbilical cord| uterus| vascular|adr…	NM_001018159	GO:0007165	signal transduction	traceable author statement	NM_001018159	GO:0005634	nucleus	not recorded	NM_001018159	GO:0005515	protein binding	inferred from physical interaction				ENST00000290810	Pfam	IPR000594	UBA/THIF-type NAD/FAD binding fold	5.15539	5.35896	5.095	5.15675
TC20001050.hg.1	3.51454	3.04112	1.3884	up	0.000112159	0.0521123	NRSN2	AF116644	neurensin 2	protein_coding	chr20	+	AF116644	335296	335692	30	20p13	80023	AF116644	NONCODE	accn=AF116644 class=mRNAlike lncRNA name=NULL ref=H-invitational v7.5 transcriptId=HIT000069980 cpcScore=-0.8270420 cnci=-0.0947602	AF116644	Q9GZP1	AF116644	Hs.416024	adrenal gland| ascites| blood| bone| bone marrow| brain| connective tissue| embryonic tissue| esophagus| eye| heart| intestine| kidney| larynx| liver| lung| lymph node| mammary gland| muscle| nerve| ovary| pancreas| pituitary gland| placenta| prostate| skin| spleen| testis| thymus| thyroid| tonsil| umbilical cord| uterus| vascular|adrenal tumor| breast (mammary gland) tumor| chondrosarcoma| esoph…	AF116644	GO:0008150	biological_process	no biological data available	AF116644	GO:0005886	plasma membrane	inferred from direct assay	AF116644	GO:0003674	molecular_function	no biological data available								3.32833	3.54097	3.60686	3.58198
TC18000183.hg.1	1.82268	1.31635	1.42043	up	0.000112433	0.0521123	snoU13.289	ENST00000458996		other	chr18	+		49072717	49072818	30			ENST00000458996	ENSEMBL	[retired]ncrna:snoRNA chromosome:GRCh37:18:49072717:49072818:1 gene:ENSG00000238885 gene_biotype:snoRNA transcript_biotype:snoRNA																									1.94852	1.92682	1.77604	1.63936
TC05000452.hg.1	1.18222	1.68908	-1.42095	down	0.000114664	0.0521123	AC093311.1	ENST00000390164		other	chr5	+		93914474	93914555	30			ENST00000390164	ENSEMBL	ncrna:novel chromosome:GRCh38:5:94578769:94578857:1 gene:ENSG00000211498 gene_biotype:miRNA transcript_biotype:miRNA																									1.31122	1.04186	1.17912	1.1967
TC20001636.hg.1	4.61422	4.08889	1.43926	up	0.000115565	0.0521123	linc-KCNG1	TCONS_00028442-XLOC_013793		ncRNA	chr20	-		49944701	49948181	30			TCONS_00028442-XLOC_013793	Rinn lincRNA	linc-KCNG1 chr20:-:49944700-49948181																									4.63046	4.61733	4.6818	4.52728
TC15001050.hg.1	4.99163	5.83067	-1.78886	down	0.000116362	0.0521123	ENST00000560053	ENST00000560053	[retired]cdna:known chromosome:GRCh37:15:23128188:23131927:-1 gene:ENSG00000259480 gene_biotype:pseudogene transcript_biotype:processed_transcript	unknown	chr15	-		23128188	23131927	30			ENST00000560053	ENSEMBL	[retired]cdna:known chromosome:GRCh37:15:23128188:23131927:-1 gene:ENSG00000259480 gene_biotype:pseudogene transcript_biotype:processed_transcript																									5.01871	4.82075	4.99989	5.12716
TC07001041.hg.1	4.92975	4.45496	1.38972	up	0.00011652	0.0521123	EN2	NM_001427	engrailed homeobox 2	protein_coding	chr7	+	NM_001427	155250824	155257526	30	7q36	2020	NM_001427	RefSeq	Homo sapiens engrailed homeobox 2 (EN2), mRNA.	NM_001427	P19622	NM_001427	Hs.134989	brain| intestine| mammary gland| uterus| breast (mammary gland) tumor| glioma| normal| adult	NM_001427	GO:0007275	multicellular organismal development	traceable author statement	NM_001427	GO:0005634	nucleus	inferred from electronic annotation	NM_001427	GO:0003700	sequence-specific DNA binding transcription factor activity	inferred from electronic annotation				ENST00000297375	Pfam	IPR001356	Homeobox domain	4.8502	4.88872	5.05202	4.92806
TC09001792.hg.1	7.93669	7.39576	1.45491	up	0.000116813	0.0521123	SMARCA2	BC040029	SWI/SNF related, matrix associated, actin dependent regulator of chromatin, subfamily a, member 2	protein_coding	chr9	+	BC040029	2015343	2047332	50	9p22.3	6595	BC040029	NONCODE	accn=BC040029 class=mRNAlike lncRNA name=NULL ref=H-invitational v7.5 transcriptId=HIT000095966 cpcScore=3.6884400 cnci=-0.0911933	BC040029	Q56A76	BC040029	Hs.298990	adrenal gland| ascites| bladder| blood| bone| brain| cervix| connective tissue| embryonic tissue| eye| heart| intestine| kidney| liver| lung| lymph| lymph node| mammary gland| mouth| muscle| ovary| pancreas| parathyroid| pharynx| pituitary gland| placenta| prostate| skin| spleen| stomach| testis| thymus| thyroid| trachea| uterus| vascular|adrenal tumor| bladder carcinoma| breast (mammary gland) t…	BC040029	GO:0000122	negative regulation of transcription from RNA polymerase II promoter	traceable author statement	BC040029	GO:0000790	nuclear chromatin	inferred from direct assay	BC040029	GO:0001105	RNA polymerase II transcription coactivator activity	inferred from direct assay								7.80009	7.89516	7.99912	8.05241
TC04002550.hg.1	2.58874	3.53389	-1.92539	down	0.00011708	0.0521123	linc_luo_1183	linc_luo_1183		ncRNA	chr4	-		54863262	54868515	30			linc_luo_1183	NONCODE	accn=NULL class=lincRNA name=Human lincRNA ref=Scripture Reconstruction LincRNAs By Luo transcriptId=linc_luo_1183 cpcScore=-1.3227000 cnci=-0.4318137																									2.83423	2.66044	2.53051	2.32976
TC15002240.hg.1	2.4564	3.51919	-2.08896	down	0.0001173	0.0521123	linc-PLEKHO2-2	TCONS_00023442-XLOC_011287		ncRNA	chr15	+		65016565	65016901	30			TCONS_00023442-XLOC_011287	Rinn lincRNA	linc-PLEKHO2-2 chr15:+:65016564-65016901																									2.47142	2.5131	2.58269	2.2584
TC17000546.hg.1	5.16335	4.58822	1.48981	up	0.000118314	0.0522188	RND2	NM_005440	Rho family GTPase 2	protein_coding	chr17	+	NM_005440	41177258	41184058	70	17q21	8153	NM_005440	RefSeq	Homo sapiens Rho family GTPase 2 (RND2), mRNA.	NM_005440	P52198	NM_005440	Hs.603111	brain| embryonic tissue| eye| kidney| larynx| liver| lung| ovary| parathyroid| pituitary gland| placenta| prostate| testis| thyroid| uterus| germ cell tumor| glioma| head and neck tumor| leukemia| liver tumor| lung tumor| non-neoplasia| normal| primitive neuroectodermal tumor of the CNS| prostate cancer| soft tissue/muscle tissue tumor| blastocyst| fetus| juvenile| adult	NM_005440	GO:0006184	GTP catabolic process	traceable author statement	NM_005440	GO:0002080	acrosomal membrane	inferred from electronic annotation	NM_005440	GO:0003924	GTPase activity	traceable author statement								4.91115	5.09579	5.26885	5.37761
TC06000352.hg.1	3.47338	3.11224	1.28444	up	0.00011982	0.0523588	DPCR1	NM_080870	diffuse panbronchiolitis critical region 1	protein_coding	chr6	+	NM_080870	30908749	30921998	95	6p21.33	135656	NM_080870	RefSeq	Homo sapiens diffuse panbronchiolitis critical region 1 (DPCR1), mRNA.	NM_080870	Q3MIW9	NM_080870	Hs.631993	adrenal gland| intestine| pancreas| stomach|adrenal tumor| gastrointestinal tumor| normal| pancreatic tumor| adult					NM_080870	GO:0016021	integral component of membrane	inferred from electronic annotation												3.41618	3.48167	3.55237	3.44331
TC17002139.hg.1	4.40218	3.94566	1.37223	up	0.000120181	0.0523588	PYY2	AF222904	peptide YY, 2 (pseudogene)	pseudogene	chr17	+	AF222904	26553589	26555091	69	17q11	23615	AF222904	NONCODE	accn=AF222904 class=mRNAlike lncRNA name=Human lncRNA ref=JounralRNA transcriptId=5181 cpcScore=-0.2704830 cnci=-0.0801126	AF222904	Q9NRI6	AF222904	Hs.157195	larynx| lung| testis| germ cell tumor| head and neck tumor| normal| fetus| adult					AF222904	GO:0005576	extracellular region	inferred from electronic annotation												4.34055	4.37216	4.49563	4.40039
TC04001625.hg.1	4.53603	5.52617	-1.98638	down	0.000125148	0.0538741	PRMT9	NM_138364	protein arginine methyltransferase 9	protein_coding	chr4	-	NM_138364	148558936	148605381	170	4q31.23	90826	NM_138364	RefSeq	Homo sapiens protein arginine methyltransferase 9 (PRMT9), mRNA.	NM_138364	Q6P2P2	NM_138364	Hs.591692	blood| bone| brain| connective tissue| embryonic tissue| eye| heart| intestine| kidney| lung| mammary gland| mouth| muscle| pancreas| pituitary gland| placenta| prostate| skin| testis| thymus| trachea| uterus| breast (mammary gland) tumor| chondrosarcoma| colorectal tumor| germ cell tumor| glioma| head and neck tumor| kidney tumor| leukemia| normal| pancreatic tumor| skin tumor| soft tissue/muscl…	NM_138364	GO:0006479	protein methylation	inferred from electronic annotation	NM_138364	GO:0005737	cytoplasm	inferred from electronic annotation	NM_138364	GO:0008276	protein methyltransferase activity	inferred from electronic annotation				ENST00000322396	Pfam	IPR010456	Ribosomal L11 methyltransferase, PrmA	4.50571	4.64144	4.45655	4.54043
TC04001647.hg.1	4.73559	5.22242	-1.40136	down	0.000127299	0.0538741	FBXW7	NM_001013415	F-box and WD repeat domain containing 7, E3 ubiquitin protein ligase	protein_coding	chr4	-	NM_001013415	153242410	153456393	220	4q31.3	55294	NM_001013415	RefSeq	Homo sapiens F-box and WD repeat domain containing 7, E3 ubiquitin protein ligase (FBXW7), transcript variant 3, mRNA.	NM_001013415	Q969H0	NM_001013415	Hs.561245	ascites| blood| bone| brain| connective tissue| ear| embryonic tissue| eye| heart| intestine| kidney| liver| lung| lymph| lymph node| mammary gland| muscle| ovary| pancreas| pharynx| pituitary gland| placenta| prostate| salivary gland| skin| testis| thymus| thyroid| trachea| uterus| vascular| chondrosarcoma| colorectal tumor| gastrointestinal tumor| germ cell tumor| glioma| head and neck tumor| k…					NM_001013415	GO:0005634	nucleus	inferred from direct assay	NM_001013415	GO:0003700	sequence-specific DNA binding transcription factor activity	inferred from electronic annotation				ENST00000263981	Pfam	IPR001680	WD40 repeat	4.69939	4.73691	4.68857	4.8175
TC02004669.hg.1	2.28626	3.18604	-1.86578	down	0.000128119	0.0538741	linc-GRB14	TCONS_00004484-XLOC_002377		ncRNA	chr2	-		165509841	165522523	30			TCONS_00004484-XLOC_002377	Rinn lincRNA	linc-GRB14 chr2:-:165509840-165522523																									2.22775	2.44109	2.27874	2.19747
TC17002183.hg.1	4.37214	3.94233	1.34706	up	0.000129459	0.0538741	AK092875	AK092875		ncRNA	chr17	+		36858705	36860997	30			AK092875	NONCODE	accn=AK092875 class=mRNAlike lncRNA name=Human lncRNA ref=JounralRNA transcriptId=3100 cpcScore=3.0452900 cnci=-0.2016182			AK092875	Hs.31037	bladder| bone| brain| cervix| intestine| kidney| lung| placenta| skin| spleen| uterus| chondrosarcoma| colorectal tumor| gastrointestinal tumor| normal| skin tumor| uterine tumor| fetus| adult																				4.30728	4.46466	4.3206	4.39603
TC03000734.hg.1	6.84145	6.15907	1.60478	up	0.000130782	0.0538741	RNY4P4	ENST00000363973	RNA, Ro-associated Y4 pseudogene 4	pseudogene	chr3	+	ENST00000363973	136307051	136307153	30			ENST00000363973	ENSEMBL	[retired]ncrna:misc_RNA chromosome:GRCh37:3:136307051:136307153:1 gene:ENSG00000200843 gene_biotype:misc_RNA transcript_biotype:misc_RNA																									6.78813	6.88159	6.74725	6.94885
TC05002551.hg.1	2.6137	2.07331	1.45437	up	0.000132545	0.0538741	linc-FER-2	TCONS_00010053-XLOC_004500		ncRNA	chr5	+		107728769	107753700	30			TCONS_00010053-XLOC_004500	Rinn lincRNA	linc-FER-2 chr5:+:107728768-107753700																									2.4194	2.73636	2.83061	2.46844
TC09002776.hg.1	5.58313	4.94401	1.55738	up	0.000132682	0.0538741	TTLL11	AK123875	tubulin tyrosine ligase-like family, member 11	protein_coding	chr9	-	AK123875	124577954	124580767	30	9q33.2	158135	AK123875	NONCODE	accn=AK123875 class=mRNAlike lncRNA name=Human lncRNA ref=JounralRNA transcriptId=4252 cpcScore=-1.0490800 cnci=-0.2159462	AK123875	Q8NHH1	AK123875	Hs.640663	brain| cervix| eye| heart| intestine| lung| muscle| prostate| spleen| stomach| testis| uterus| chondrosarcoma| colorectal tumor| glioma| normal| prostate cancer| soft tissue/muscle tissue tumor| fetus| adult	AK123875	GO:0006464	cellular protein modification process	inferred from electronic annotation	AK123875	GO:0005737	cytoplasm	inferred from electronic annotation	AK123875	GO:0016874	ligase activity	inferred from electronic annotation								5.75484	5.27242	5.72715	5.57811
TC21000194.hg.1	5.09289	4.5958	1.41137	up	0.000133419	0.0538741	AP001619.3	OTTHUMT00000195227	putative novel transcript	antisense	chr21	+	OTTHUMT00000195227	43290742	43292163	30			OTTHUMT00000195227	Havana transcript	cdna:all chromosome:VEGA56:21:41870633:41872054:1 Gene:OTTHUMG00000086778																									5.08435	5.13013	5.16643	4.99066
TC6_dbb_hap3000043.hg.1	3.18513	2.81563	1.29191	up	0.00013563	0.0538741	DPCR1	NM_080870	diffuse panbronchiolitis critical region 1	protein_coding	chr6_dbb_hap3	+	NM_080870	2202893	2216112	75	6p21.33	135656	NM_080870	RefSeq	Homo sapiens diffuse panbronchiolitis critical region 1 (DPCR1), mRNA.	NM_080870	Q3MIW9	NM_080870	Hs.631993	adrenal gland| intestine| pancreas| stomach|adrenal tumor| gastrointestinal tumor| normal| pancreatic tumor| adult					NM_080870	GO:0016021	integral component of membrane	inferred from electronic annotation												3.1805	3.22751	3.16057	3.17197
TC0X000213.hg.1	4.12452	4.87297	-1.67998	down	0.000135794	0.0538741	RNU6-523P	ENST00000516304	RNA, U6 small nuclear 523, pseudogene	snRNA	chrX	+	ENST00000516304	44744751	44744811	30			ENST00000516304	ENSEMBL	ncrna:known chromosome:GRCh38:10:67858818:67858871:-1 gene:ENSG00000252113 gene_biotype:snRNA transcript_biotype:snRNA																									4.20225	4.16125	3.89203	4.24255
TC04001404.hg.1	1.37702	1.97826	-1.51702	down	0.000137933	0.0538741	RNU7-149P	ENST00000516739	RNA, U7 small nuclear 149 pseudogene	snRNA	chr4	-	ENST00000516739	99887966	99888024	30			ENST00000516739	ENSEMBL	ncrna:known chromosome:GRCh38:4:98966815:98966873:-1 gene:ENSG00000252548 gene_biotype:snRNA transcript_biotype:snRNA																									1.48535	1.41476	1.22005	1.38792
TC08000661.hg.1	2.82828	2.35028	1.39281	up	0.00013845	0.0538741	RNA5SP275	ENST00000363936	RNA, 5S ribosomal pseudogene 275	rRNA	chr8	+	ENST00000363936	108896722	108896839	30			ENST00000363936	ENSEMBL	ncrna:known chromosome:GRCh38:8:107884494:107884611:1 gene:ENSG00000200806 gene_biotype:rRNA transcript_biotype:rRNA																									2.8543	2.74232	2.94241	2.7741
TC01005541.hg.1	3.07317	4.32759	-2.38572	down	0.000139019	0.0538741	linc-JAK1-1	TCONS_l2_00001274-XLOC_l2_000942		ncRNA	chr1	-		65450881	65451399	29			TCONS_l2_00001274-XLOC_l2_000942	Broad TUCP	linc-JAK1-1 chr1:-:65450880-65451399																									3.30146	3.08061	2.99749	2.91314
TC09000607.hg.1	4.53854	4.95418	-1.33388	down	0.00013934	0.0538741	CNTRL	NM_007018	centriolin	protein_coding	chr9	+	NM_007018	123837141	123939888	653	9q33.2	11064	NM_007018	RefSeq	Homo sapiens centriolin (CNTRL), mRNA.	NM_007018	Q7Z7A1	NM_007018	Hs.653263	ascites| blood| bone| bone marrow| brain| connective tissue| embryonic tissue| eye| heart| intestine| kidney| liver| lung| lymph node| mouth| muscle| ovary| pancreas| pharynx| pituitary gland| placenta| spleen| stomach| testis| thymus| trachea| uterus| vascular| chondrosarcoma| colorectal tumor| gastrointestinal tumor| germ cell tumor| head and neck tumor| kidney tumor| leukemia| liver tumor| non…	NM_007018	GO:0000086	G2/M transition of mitotic cell cycle	traceable author statement	NM_007018	GO:0005737	cytoplasm	inferred from direct assay	NM_007018	GO:0005515	protein binding	inferred from physical interaction				ENST00000238341	Pfam	IPR001611	Leucine-rich repeat	4.52789	4.65356	4.52951	4.44322
TC07000911.hg.1	2.88773	2.44468	1.35947	up	0.000139426	0.0538741	TRBV19	ENST00000390393	T cell receptor beta variable 19	protein_coding	chr7	+	ENST00000390393	142326363	142327046	30			ENST00000390393	ENSEMBL	havana_ig_gene:known chromosome:GRCh38:7:142618849:142619532:1 gene:ENSG00000211746 gene_biotype:TR_V_gene transcript_biotype:TR_V_gene			AF043180	Hs.511720	brain| mammary gland| pharynx| thymus| uterus| normal| adult									ENST00000390393	GO:0005515	protein binding	inferred from electronic annotation				ENST00000390393	Pfam	IPR013106	Immunoglobulin V-set domain	2.74954	2.97262	2.82754	3.00121
TC07000137.hg.1	4.17347	6.39298	-4.65737	down	0.000139945	0.0538741	IL6	NM_000600	interleukin 6	protein_coding	chr7	+	NM_000600	22765503	22771621	139	7p21	3569	NM_000600	RefSeq	Homo sapiens interleukin 6 (IL6), mRNA.	NM_000600	P05231	NM_000600	Hs.654458	ascites| blood| bone| brain| connective tissue| eye| intestine| kidney| lung| lymph node| muscle| ovary| pancreas| placenta| skin| spleen| thymus| vascular| bladder carcinoma| chondrosarcoma| gastrointestinal tumor| glioma| kidney tumor| lung tumor| normal| skin tumor| soft tissue/muscle tissue tumor| fetus| adult					NM_000600	GO:0005576	extracellular region	traceable author statement	NM_000600	GO:0005125	cytokine activity	inferred from direct assay	NM_000600	GenMAPP	Smooth_muscle_contraction	ENST00000258743	Pfam	IPR003573	Interleukin-6/Interleukin-23/GCSF/MGF	4.24313	4.09172	4.14411	4.2149
TC15000259.hg.1	6.23962	6.74243	-1.41697	down	0.000140043	0.0538741	SPRED1	NM_152594	sprouty-related, EVH1 domain containing 1	protein_coding	chr15	+	NM_152594	38544527	38649450	100	15q14	161742	NM_152594	RefSeq	Homo sapiens sprouty-related, EVH1 domain containing 1 (SPRED1), mRNA.	NM_152594	Q7Z699	NM_152594	Hs.525781	adrenal gland| ascites| bladder| blood| brain| cervix| connective tissue| ear| embryonic tissue| esophagus| heart| intestine| kidney| larynx| liver| lung| mammary gland| mouth| muscle| pancreas| pharynx| placenta| prostate| skin| spleen| stomach| testis| thyroid| trachea| uterus| vascular|adrenal tumor| breast (mammary gland) tumor| cervical tumor| chondrosarcoma| colorectal tumor| esophageal tum…	NM_152594	GO:0000188	inactivation of MAPK activity	inferred from sequence or structural similarity	NM_152594	GO:0005634	nucleus	inferred from direct assay	NM_152594	GO:0005173	stem cell factor receptor binding	inferred from sequence or structural similarity				ENST00000299084	Pfam	IPR000697	WH1/EVH1	6.11972	6.19598	6.4361	6.20668
TC17000021.hg.1	3.82274	3.25674	1.48041	up	0.000140111	0.0538741	LOC101927839	ENST00000414776	uncharacterized LOC101927839	ncRNA	chr17	+	ENST00000414776	2135974	2136904	30		101927839	ENST00000414776	ENSEMBL	havana:known chromosome:GRCh38:17:2232680:2233610:1 gene:ENSG00000225084 gene_biotype:antisense transcript_biotype:antisense			ENST00000414776	Hs.665648	brain| mammary gland| testis| breast (mammary gland) tumor| normal| fetus| adult																				3.84197	3.78946	3.93645	3.72309
TC16000819.hg.1	4.12198	3.61017	1.42583	up	0.000140163	0.0538741	BC141902	BC141902	Homo sapiens cDNA clone IMAGE:40030352.	other	chr16	-		3583437	3584255	30			BC141902	GenBank	Homo sapiens cDNA clone IMAGE:40030352.	BC141902	Q96AJ1	BC141902	Hs.742198	thyroid| head and neck tumor| normal| adult	BC141902	GO:0030030	cell projection organization	inferred from electronic annotation	BC141902	GO:0005634	nucleus	inferred from direct assay	BC141902	GO:0005515	protein binding	inferred from physical interaction								4.1933	4.16226	4.20194	3.93041
TC09002667.hg.1	4.91216	4.3288	1.49834	up	0.000140362	0.0538741	MIRLET7DHG	OTTHUMT00000053172	MIRLET7D host gene (non-protein coding)	ncRNA	chr9	-	OTTHUMT00000053172	95978705	96006639	40			OTTHUMT00000053172	NONCODE	accn=NULL class=mRNAlike lncRNA name=vega lncRNA ref=GENCODE transcriptId=OTTHUMT00000053172 cpcScore=-0.0957109 cnci=-0.2240657 gene:OTTHUMG00000020259																									4.83075	4.95051	4.88855	4.97882
TC13001406.hg.1	3.08395	2.55931	1.43858	up	0.000140414	0.0538741	linc-KATNAL1-2	TCONS_00021627-XLOC_010557		ncRNA	chr13	-		30993656	30996374	30			TCONS_00021627-XLOC_010557	Rinn lincRNA	linc-KATNAL1-2 chr13:-:30993655-30996374																									3.05509	3.09999	3.11422	3.06651
TC19002172.hg.1	5.29846	7.4313	-4.3858	down	0.000142174	0.0541468	FOSB	D16366	FBJ murine osteosarcoma viral oncogene homolog B	protein_coding	chr19	+	D16366	45978197	45978439	30	19q13.32	2354	D16366	NONCODE	accn=D16366 class=mRNAlike lncRNA name=NULL ref=H-invitational v7.5 transcriptId=HIT000100583 cpcScore=-1.1234600 cnci=-0.2712278	D16366	P53539	D16366	Hs.590958	adipose tissue| adrenal gland| ascites| blood| bone| brain| cervix| connective tissue| embryonic tissue| eye| heart| intestine| kidney| larynx| liver| lung| lymph node| mammary gland| mouth| muscle| ovary| pancreas| placenta| prostate| spleen| stomach| testis| thymus| thyroid| tonsil| trachea| uterus| breast (mammary gland) tumor| chondrosarcoma| colorectal tumor| gastrointestinal tumor| head and…	D16366	GO:0000122	negative regulation of transcription from RNA polymerase II promoter	traceable author statement	D16366	GO:0005634	nucleus	inferred from electronic annotation	D16366	GO:0003677	DNA binding	traceable author statement								5.91693	5.3392	4.78128	5.15644
TC11000082.hg.1	5.30417	4.90861	1.31546	up	0.000142861	0.0541468	ART1	NM_004314	ADP-ribosyltransferase 1	protein_coding	chr11	+	NM_004314	3666358	3685646	86	11p15	417	NM_004314	RefSeq	Homo sapiens ADP-ribosyltransferase 1 (ART1), mRNA.	NM_004314	P52961	NM_004314	Hs.382188	muscle| normal	NM_004314	GO:0006471	protein ADP-ribosylation	inferred from electronic annotation	NM_004314	GO:0005886	plasma membrane	traceable author statement	NM_004314	GO:0003950	NAD+ ADP-ribosyltransferase activity	inferred from electronic annotation				ENST00000250693	Pfam	IPR000768	NAD:arginine ADP-ribosyltransferase, ART	5.36203	5.29706	5.28489	5.27272
TC02004133.hg.1	2.9377	5.24021	-4.93316	down	0.00014353	0.0541468	BRE-AS1	NR_028308	BRE antisense RNA 1	ncRNA	chr2	-	NR_028308	28112323	28113981	30	2p23	100302650	NR_028308	NONCODE	accn=NR_028308 class=lncRNA name= ref=RefGeneNoncode transcriptId=NR_028308 cpcScore=-1.0462000 cnci=-0.2859040			NR_028308	Hs.729719	bone| brain| eye| lung| lymph node| ovary| pancreas| pituitary gland| placenta| skin| uterus| chondrosarcoma| lymphoma| normal| soft tissue/muscle tissue tumor| uterine tumor| adult																				3.01642	2.53843	2.90301	3.29295
TC08001909.hg.1	3.50577	3.07082	1.35186	up	0.000146539	0.0546781	linc-C8orf22-2	TCONS_00014691-XLOC_006790		ncRNA	chr8	+		49532379	49536448	30			TCONS_00014691-XLOC_006790	Rinn lincRNA	linc-C8orf22-2 chr8:+:49532378-49536448																									3.52499	3.66259	3.42117	3.41435
TC03002886.hg.1	3.09188	2.61061	1.39597	up	0.000146818	0.0546781	uc003cpd.1	uc003cpd.1		ncRNA	chr3	-		46058516	46062157	30			uc003cpd.1	NONCODE	accn=NULL class=lncRNA name= ref=UCSCGeneNoncode transcriptId=uc003cpd.1 cpcScore=-0.5315110 cnci=-0.2295818																									3.15636	3.04108	3.11116	3.05891
TC01005915.hg.1	1.73153	2.26378	-1.44619	down	0.000148519	0.0546781	RP1-10C16.1	OTTHUMT00000083614	novel transcript	ncRNA	chr1	-	OTTHUMT00000083614	166999227	167010352	30			OTTHUMT00000083614	NONCODE	accn=NULL class=mRNAlike lncRNA name=vega lncRNA ref=GENCODE transcriptId=OTTHUMT00000083614 cpcScore=1.1033200 cnci=-0.3432721 gene:OTTHUMG00000034550																									1.91706	1.67736	1.68242	1.64928
TC01001122.hg.1	3.43298	3.04824	1.30563	up	0.000148526	0.0546781	ENST00000503154	ENST00000503154		ncRNA	chr1	+		147628427	147630473	30			ENST00000503154	NONCODE	accn=NULL class=lncRNA name= ref=EnsemblNoncode transcriptId=ENST00000503154 cpcScore=-1.1228900 cnci=-0.1769372																									3.33596	3.45087	3.47618	3.46893
TC04002603.hg.1	2.69836	2.21643	1.39662	up	0.000149038	0.0546781	uc003hkh.2	uc003hkh.2		ncRNA	chr4	-		77806700	77807718	30			uc003hkh.2	NONCODE	accn=NULL class=lncRNA name= ref=UCSCGeneNoncode transcriptId=uc003hkh.2 cpcScore=0.6086910 cnci=-0.2452744																									2.69858	2.5837	2.71363	2.79755
TC11000331.hg.1	6.82859	6.28995	1.45261	up	0.000149796	0.0546781	MIR1343	NR_039836	microRNA 1343	miRNA	chr11	+	NR_039836	34963384	34963467	30		100616437	NR_039836	RefSeq	Homo sapiens microRNA 1343 (MIR1343), microRNA.																									6.62789	6.83128	6.93845	6.91674
TC07002254.hg.1	6.45147	7.16098	-1.63525	down	0.000151096	0.0548561	linc-EEPD1-3	TCONS_l2_00025794-XLOC_l2_013345		ncRNA	chr7	+		35985936	36013288	77			TCONS_l2_00025794-XLOC_l2_013345	Broad TUCP	linc-EEPD1-3 chr7:+:35985935-35997807																									6.42802	6.52446	6.27986	6.57353
TC09002573.hg.1	5.48181	6.0375	-1.46986	down	0.000155593	0.0558044	RP11-274B18.2	OTTHUMT00000052552	novel transcript	other	chr9	-	OTTHUMT00000052552	70348277	70351325	42			OTTHUMT00000052552	NONCODE	accn=NULL class=mRNAlike lncRNA name=vega lncRNA ref=GENCODE transcriptId=OTTHUMT00000052552 cpcScore=-0.6307900 cnci=-0.2542593 gene:OTTHUMG00000019968																									5.73966	5.45489	5.36283	5.36987
TC22001178.hg.1	5.52204	4.98269	1.45332	up	0.000158807	0.0558044	linc-KLHDC7B	TCONS_00029630-XLOC_014287		ncRNA	chr22	+		50984904	50986244	30			TCONS_00029630-XLOC_014287	Rinn lincRNA	linc-KLHDC7B chr22:+:50984903-50986244																									5.48831	5.49456	5.65927	5.44603
TC07000090.hg.1	4.43038	4.93358	-1.41735	down	0.000158969	0.0558044	PHF14	NM_014660	PHD finger protein 14	protein_coding	chr7	+	NM_014660	11013499	11209250	363	7p21.3	9678	NM_014660	RefSeq	Homo sapiens PHD finger protein 14 (PHF14), transcript variant 2, mRNA.	NM_014660	O94880	NM_014660	Hs.655688	ascites| bladder| blood| bone| brain| connective tissue| ear| embryonic tissue| eye| intestine| kidney| larynx| liver| lung| lymph| lymph node| mammary gland| mouth| muscle| nerve| ovary| pancreas| pharynx| placenta| prostate| skin| spleen| stomach| testis| thymus| uterus| vascular| breast (mammary gland) tumor| chondrosarcoma| colorectal tumor| gastrointestinal tumor| germ cell tumor| glioma| he…									NM_014660	GO:0008270	zinc ion binding	inferred from electronic annotation				ENST00000403050	Pfam	IPR019787	Zinc finger, PHD-finger	4.42306	4.48943	4.3445	4.46455
TC0X000279.hg.1	3.25404	2.6081	1.56476	up	0.00015938	0.0558044	MIR532	NR_030241	microRNA 532	miRNA	chrX	+	NR_030241	49767754	49767844	30	Xp11.23	693124	NR_030241	RefSeq	Homo sapiens microRNA 532 (MIR532), microRNA.																									3.16314	3.09496	3.57487	3.18319
TC09000508.hg.1	4.0984	7.20922	-8.63875	down	0.000159467	0.0558044	NR4A3	NM_006981	nuclear receptor subfamily 4, group A, member 3	protein_coding	chr9	+	NM_006981	102584137	102629173	136	9q22	8013	NM_006981	RefSeq	Homo sapiens nuclear receptor subfamily 4, group A, member 3 (NR4A3), transcript variant 1, mRNA.	NM_006981	Q92570	NM_006981	Hs.279522	adipose tissue| adrenal gland| blood| brain| cervix| connective tissue| ear| eye| heart| liver| lung| lymph node| mouth| muscle| nerve| ovary| prostate| skin| stomach| testis| thyroid| uterus|adrenal tumor| cervical tumor| chondrosarcoma| gastrointestinal tumor| head and neck tumor| leukemia| non-neoplasia| normal| skin tumor| uterine tumor| fetus| juvenile| adult	NM_006981	GO:0001707	mesoderm formation	inferred from electronic annotation	NM_006981	GO:0005634	nucleus	non-traceable author statement	NM_006981	GO:0001077	RNA polymerase II core promoter proximal region sequence-specific DNA binding transcription factor activity involved in positive regulation of transcription	inferred from electronic annotation	NM_006981	GenMAPP	Hypertrophy_model	ENST00000338488	Pfam	IPR001628	Zinc finger, nuclear hormone receptor-type	3.99774	4.07904	3.78912	4.52771
TC02003766.hg.1	2.79802	3.76546	-1.95536	down	0.000160078	0.0558044	linc-CASP10-1	TCONS_00003986-XLOC_001809		ncRNA	chr2	+		202038291	202043285	30			TCONS_00003986-XLOC_001809	Rinn lincRNA	linc-CASP10-1 chr2:+:202038290-202042899																									3.21495	2.95221	2.72957	2.29537
TC11000109.hg.1	2.65836	2.12256	1.44975	up	0.000160238	0.0558044	OR51B6	NM_001004750	olfactory receptor, family 51, subfamily B, member 6	protein_coding	chr11	+	NM_001004750	5372738	5373676	30	11p15.4	390058	NM_001004750	RefSeq	Homo sapiens olfactory receptor, family 51, subfamily B, member 6 (OR51B6), mRNA.	NM_001004750	Q9H340	NM_001004750	Hs.553730		NM_001004750	GO:0007186	G-protein coupled receptor signaling pathway	inferred from electronic annotation	NM_001004750	GO:0005886	plasma membrane	traceable author statement	NM_001004750	GO:0004930	G-protein coupled receptor activity	inferred from electronic annotation				ENST00000380219	Pfam	IPR000276	G protein-coupled receptor, rhodopsin-like	2.83273	2.60983	2.42619	2.76466
TC11002886.hg.1	3.30439	2.8175	1.40142	up	0.000160543	0.0558044	linc-APOC3-3	TCONS_00019481-XLOC_009284		ncRNA	chr11	+		115794359	115800208	40			TCONS_00019481-XLOC_009284	Rinn lincRNA	linc-APOC3-3 chr11:+:115794358-115800208																									3.33579	3.36511	3.2191	3.29756
TC06000206.hg.1	3.04375	3.9328	-1.85195	down	0.000161177	0.0558044	TRNA_Ala	uc021yob.1		other	chr6	+		26673590	26673662	30			uc021yob.1	UCSC Genes	transfer RNA Ala (anticodon AGC)																									3.39632	3.07703	3.00769	2.69396
TC19002561.hg.1	3.34188	2.85481	1.40159	up	0.00016343	0.0558044	FLJ30403	NR_034159	uncharacterized LOC729975	other	chr19	-	NR_034159	52095036	52097633	30	19q13.41	729975	NR_034159	NONCODE	accn=NR_034159 class=lncRNA name= ref=RefGeneNoncode transcriptId=NR_034159 cpcScore=1.6398700 cnci=-0.1885119	NR_034159	Q96NP5	NR_034159	Hs.716785	brain| muscle| pancreas| germ cell tumor| normal| adult	NR_034159	GO:0005975	carbohydrate metabolic process	inferred from electronic annotation					NR_034159	GO:0016757	transferase activity, transferring glycosyl groups	inferred from electronic annotation								3.2445	3.41283	3.29192	3.41827
TC03000330.hg.1	5.78379	5.2721	1.42571	up	0.000164854	0.0558044	RP5-1157M23.2	OTTHUMT00000350204	novel transcript, antisense to TWF2	antisense	chr3	+	OTTHUMT00000350204	52273274	52275113	30			OTTHUMT00000350204	Havana transcript	cdna:all chromosome:VEGA56:3:52239300:52241097:1 Gene:OTTHUMG00000158107			ENST00000483834	Hs.281931	blood| lymph| skin| spleen| thymus| lymphoma| normal| skin tumor| adult																				5.7706	5.74388	5.88049	5.74017
TC12003110.hg.1	2.78934	2.26766	1.43562	up	0.00016626	0.0558044	NOS1	AF446131	nitric oxide synthase 1 (neuronal)	protein_coding	chr12	-	AF446131	117889507	117890028	30	12q24.22	4842	AF446131	NONCODE	accn=AF446131 class=mRNAlike lncRNA name=NULL ref=H-invitational v7.5 transcriptId=HIT000079775 cpcScore=-1.2845900 cnci=-0.2768150	AF446131	P29475	AF446131	Hs.654410	brain| kidney| lung| muscle| ovary| prostate| uterus| glioma| non-neoplasia| normal| soft tissue/muscle tissue tumor| uterine tumor| juvenile| adult	AF446131	GO:0001666	response to hypoxia	inferred from expression pattern	AF446131	GO:0001917	photoreceptor inner segment	inferred from sequence or structural similarity	AF446131	GO:0003958	NADPH-hemoprotein reductase activity	not recorded	AF446131	GenMAPP	Smooth_muscle_contraction					2.84385	2.85595	2.77904	2.67851
TC12000252.hg.1	4.03434	4.60502	-1.48523	down	0.000166821	0.0558044	LYRM5	NM_001001660	LYR motif containing 5	protein_coding	chr12	+	NM_001001660	25348150	25362579	113	12p12.1	144363	NM_001001660	RefSeq	Homo sapiens LYR motif containing 5 (LYRM5), mRNA.	NM_001001660	Q6IPR1	NM_001001660	Hs.209151	adrenal gland| bladder| blood| bone| bone marrow| brain| connective tissue| ear| embryonic tissue| eye| heart| intestine| kidney| liver| lung| lymph| lymph node| mammary gland| muscle| ovary| pancreas| parathyroid| pharynx| placenta| prostate| salivary gland| skin| stomach| testis| thyroid| uterus| vascular|adrenal tumor| bladder carcinoma| chondrosarcoma| colorectal tumor| germ cell tumor| gliom…					NM_001001660	GO:0005739	mitochondrion	inferred from electronic annotation								ENST00000381356	Pfam	IPR008011	Complex 1 LYR protein	4.1593	3.99199	3.93426	4.0518
TC15000551.hg.1	5.65659	5.21032	1.36251	up	0.00016699	0.0558044	DQ595396	DQ595396	Homo sapiens piRNA piR-61508, complete sequence.	other	chr15	+		62545376	62545429	30			DQ595396	GenBank	Homo sapiens piRNA piR-61508, complete sequence.																									5.67744	5.79181	5.58578	5.57133
TC07002875.hg.1	2.1147	1.66747	1.36342	up	0.000168198	0.0558044	LOC100130673	NR_038454	phosphoribosyl pyrophosphate synthetase 2 pseudogene	pseudogene	chr7	-	NR_038454	32496510	32498106	30	7p14.3	100130673	NR_038454	NONCODE	accn=NR_038454 class=lncRNA name= ref=RefGeneNoncode transcriptId=NR_038454 cpcScore=1.9183000 cnci=-0.2116122			NR_038454	Hs.609282	lung| lung tumor																				2.22887	2.06258	2.04263	2.12471
TC05000476.hg.1	1.56131	1.97576	-1.33279	down	0.000169202	0.0558044	RP11-455B3.1	OTTHUMT00000370176	novel transcript	ncRNA	chr5	+	OTTHUMT00000370176	97217124	97258399	30			OTTHUMT00000370176	Havana transcript	cdna:all chromosome:VEGA56:5:97881428:97922695:1 Gene:OTTHUMG00000162710																									1.55392	1.58374	1.531	1.57657
TC05000944.hg.1	4.03388	3.55403	1.3946	up	0.00016996	0.0558044	CTB-78H18.1	OTTHUMT00000372373	novel protein	ncRNA	chr5	+	OTTHUMT00000372373	171200656	171201743	30			OTTHUMT00000372373	Havana transcript	cdna:all chromosome:VEGA56:5:171773652:171774739:1 Gene:OTTHUMG00000163264	ENST00000524175	E5RFQ6																							3.98818	3.92924	4.07236	4.14575
TC11003410.hg.1	5.32451	4.88932	1.35209	up	0.000171493	0.0558044	TP53AIP1	EF693749	tumor protein p53 regulated apoptosis inducing protein 1	protein_coding	chr11	-	EF693749	128807611	128812798	30	11q24	63970	EF693749	NONCODE	accn=EF693749 class=mRNAlike lncRNA name=NULL ref=H-invitational v7.5 transcriptId=HIT000469862 cpcScore=-0.0778485 cnci=-0.0755199	EF693749	A7LAQ2	EF693749	Hs.160953	bladder| brain| lung| mouth| muscle| ovary| pituitary gland| skin| thymus| bladder carcinoma| head and neck tumor| normal| skin tumor| fetus| adult	EF693749	GO:0006915	apoptotic process	traceable author statement	EF693749	GO:0005739	mitochondrion	traceable author statement	EF693749	GO:0003674	molecular_function	no biological data available								5.27301	5.45629	5.23153	5.33721
TC11003454.hg.1	4.66717	4.16185	1.41943	up	0.000174336	0.0558044	PGA5	NM_014224	pepsinogen 5, group I (pepsinogen A)	protein_coding	chr11	+	NM_014224	61008514	61018929	148	11q13	5222	NM_014224	RefSeq	Homo sapiens pepsinogen 5, group I (pepsinogen A) (PGA5), mRNA.	NM_014224	P0DJD7	NM_014224	Hs.432854	esophagus| kidney| stomach| gastrointestinal tumor| kidney tumor| normal| adult	NM_014224	GO:0006508	proteolysis	inferred from electronic annotation	NM_014224	GO:0005576	extracellular region	inferred from electronic annotation	NM_014224	GO:0004190	aspartic-type endopeptidase activity	inferred from electronic annotation				ENST00000312403	Pfam	IPR001461	Aspartic peptidase	4.66605	4.90725	4.62055	4.47483
TC03000596.hg.1	4.91991	4.37453	1.4594	up	0.000174898	0.0558044	RP11-326J18.1	OTTHUMT00000354480	novel transcript	ncRNA	chr3	+	OTTHUMT00000354480	115377380	115380126	30			OTTHUMT00000354480	Havana transcript	cdna:all chromosome:VEGA56:3:115658533:115661279:1 Gene:OTTHUMG00000159304																									4.748	4.96789	5.06393	4.89984
TC07001309.hg.1	1.6406	1.292	1.27333	up	0.000175378	0.0558044	POU6F2-AS1	ENST00000433519	POU6F2 antisense RNA 1	antisense	chr7	-	ENST00000433519	39444197	39445945	30	7p14.1	100861520	ENST00000433519	ENSEMBL	havana:known chromosome:GRCh38:7:39404598:39406346:-1 gene:ENSG00000224122 gene_biotype:antisense transcript_biotype:antisense			ENST00000433519	Hs.571292	normal| fetus																				1.63647	1.67377	1.68579	1.56638
TC19000388.hg.1	4.82318	5.16511	-1.26745	down	0.000176093	0.0558044	ZNF714	NM_182515	zinc finger protein 714	protein_coding	chr19	+	NM_182515	21264953	21307883	140	19p12	148206	NM_182515	RefSeq	Homo sapiens zinc finger protein 714 (ZNF714), transcript variant 1, mRNA.	NM_182515	Q96N38	NM_182515	Hs.729186	ascites| blood| brain| connective tissue| embryonic tissue| eye| liver| lung| lymph| lymph node| muscle| pancreas| placenta| prostate| skin| stomach| testis| thymus| thyroid| uterus| gastrointestinal tumor| germ cell tumor| head and neck tumor| leukemia| lung tumor| lymphoma| non-neoplasia| normal| pancreatic tumor| primitive neuroectodermal tumor of the CNS| prostate cancer| retinoblastoma| soft…	NM_182515	GO:0006351	transcription, DNA-templated	inferred from electronic annotation	NM_182515	GO:0005634	nucleus	inferred from electronic annotation	NM_182515	GO:0003677	DNA binding	inferred from electronic annotation								4.8158	4.90292	4.81312	4.76088
TC07000806.hg.1	5.37426	4.93122	1.35947	up	0.000177421	0.0558044	LOC100128325	ENST00000469264	uncharacterized LOC100128325	unknown	chr7	+	ENST00000469264	129781571	129782455	40	7q32.2	100128325	ENST00000469264	ENSEMBL	havana:known chromosome:GRCh38:7:130141731:130142539:1 gene:ENSG00000229196 gene_biotype:antisense transcript_biotype:antisense																									5.48468	5.27755	5.35019	5.38463
TC03001496.hg.1	5.54925	6.06899	-1.4337	down	0.000177627	0.0558044	DENND6A	NM_152678	DENN/MADD domain containing 6A	protein_coding	chr3	-	NM_152678	57611181	57678816	270	3p14.3	201627	NM_152678	RefSeq	Homo sapiens DENN/MADD domain containing 6A (DENND6A), mRNA.	NM_152678	Q8IWF6	NM_152678	Hs.91085	adrenal gland| blood| bone| brain| cervix| connective tissue| ear| embryonic tissue| eye| kidney| lung| lymph node| mammary gland| mouth| muscle| ovary| pancreas| parathyroid| placenta| prostate| skin| stomach| testis| thymus| thyroid| uterus|adrenal tumor| chondrosarcoma| gastrointestinal tumor| germ cell tumor| glioma| head and neck tumor| leukemia| non-neoplasia| normal| ovarian tumor| pancrea…	NM_152678	GO:0032313	regulation of Rab GTPase activity	inferred from direct assay	NM_152678	GO:0005737	cytoplasm	inferred from direct assay	NM_152678	GO:0017112	Rab guanyl-nucleotide exchange factor activity	inferred from direct assay				ENST00000311128	Pfam	IPR001194	DENN domain	5.53649	5.72097	5.52422	5.4153
TC04002110.hg.1	2.78059	3.55031	-1.70493	down	0.000178392	0.0558044	linc-BMPR1B	TCONS_00007574-XLOC_003611		ncRNA	chr4	+		95596396	95623721	30			TCONS_00007574-XLOC_003611	Rinn lincRNA	linc-BMPR1B chr4:+:95596395-95623721																									3.09725	2.55576	2.57076	2.89862
TC08002253.hg.1	4.47495	6.73187	-4.77969	down	0.000178692	0.0558044	EGR3	S40832	early growth response 3	protein_coding	chr8	-	S40832	22545238	22550815	30	8p23-p21	1960	S40832	NONCODE	accn=S40832 class=mRNAlike lncRNA name=Human lncRNA ref=JounralRNA transcriptId=3932 cpcScore=2.3176100 cnci=-0.1444044	S40832	Q06889	S40832	Hs.534313	blood| brain| connective tissue| ear| embryonic tissue| eye| liver| lung| mammary gland| nerve| pancreas| pituitary gland| skin| spleen| testis| thymus| trachea| uterus| vascular| chondrosarcoma| glioma| non-neoplasia| normal| uterine tumor| blastocyst| fetus| juvenile| adult	S40832	GO:0001938	positive regulation of endothelial cell proliferation	inferred from mutant phenotype	S40832	GO:0005634	nucleus	not recorded	S40832	GO:0003677	DNA binding	inferred from electronic annotation								4.40553	4.39463	4.6605	4.43912
TC09001311.hg.1	4.53459	4.0185	1.43007	up	0.000179713	0.0558044	SHC3	NM_016848	SHC (Src homology 2 domain containing) transforming protein 3	protein_coding	chr9	-	NM_016848	91620686	91793682	170	9q22.1	53358	NM_016848	RefSeq	Homo sapiens SHC (Src homology 2 domain containing) transforming protein 3 (SHC3), mRNA.	NM_016848	Q92529	NM_016848	Hs.292737	adrenal gland| blood| brain| connective tissue| embryonic tissue| eye| heart| intestine| kidney| lung| muscle| ovary| pancreas| placenta| skin| chondrosarcoma| colorectal tumor| germ cell tumor| glioma| leukemia| non-neoplasia| normal| ovarian tumor| pancreatic tumor| primitive neuroectodermal tumor of the CNS| soft tissue/muscle tissue tumor|embryoid body| fetus| infant| adult	NM_016848	GO:0007169	transmembrane receptor protein tyrosine kinase signaling pathway	traceable author statement	NM_016848	GO:0005829	cytosol	traceable author statement	NM_016848	GO:0004871	signal transducer activity	traceable author statement	NM_016848	GenMAPP	Integrin-mediated_cell_adhesion_KEGG	ENST00000375831	Pfam	IPR000980	SH2 domain	4.52206	4.51178	4.56868	4.53582
TC01004768.hg.1	3.74067	4.71645	-1.9667	down	0.000180661	0.0558044	AF088050	AF088050		ncRNA	chr1	+		156129357	156129720	30			AF088050	NONCODE	accn=AF088050 class=mRNAlike lncRNA name=NULL ref=H-invitational v7.5 transcriptId=HIT000067598 cpcScore=-1.0325400 cnci=-0.2881628			AF088050	Hs.684671																					3.72603	3.95415	3.67746	3.60504
TC02002847.hg.1	4.23353	3.72197	1.42559	up	0.000181299	0.0558044	DNER	NM_139072	delta/notch-like EGF repeat containing	protein_coding	chr2	-	NM_139072	230222345	230579286	187	2q36.3	92737	NM_139072	RefSeq	Homo sapiens delta/notch-like EGF repeat containing (DNER), mRNA.	NM_139072	Q8NFT8	NM_139072	Hs.234074	adrenal gland| bone| brain| cervix| connective tissue| ear| eye| kidney| larynx| liver| lung| lymph node| mammary gland| muscle| pancreas| pituitary gland| placenta| testis| thyroid| uterus| breast (mammary gland) tumor| cervical tumor| chondrosarcoma| germ cell tumor| glioma| head and neck tumor| kidney tumor| liver tumor| lymphoma| non-neoplasia| normal| soft tissue/muscle tissue tumor| fetus| …	NM_139072	GO:0001764	neuron migration	non-traceable author statement	NM_139072	GO:0005769	early endosome	inferred from direct assay	NM_139072	GO:0004888	transmembrane signaling receptor activity	traceable author statement				ENST00000341772	Pfam	IPR000742	Epidermal growth factor-like domain	4.17641	4.20806	4.22095	4.3287
TC16001195.hg.1	5.11146	4.68962	1.33963	up	0.000181511	0.0558044	GFOD2	NM_001243650	glucose-fructose oxidoreductase domain containing 2	protein_coding	chr16	-	NM_001243650	67708436	67753324	70	16q22.1	81577	NM_001243650	RefSeq	Homo sapiens glucose-fructose oxidoreductase domain containing 2 (GFOD2), transcript variant 3, mRNA.	NM_001243650	Q3B7J2	NM_001243650	Hs.307084	adrenal gland| ascites| bladder| blood| bone marrow| brain| cervix| connective tissue| embryonic tissue| esophagus| eye| heart| intestine| kidney| larynx| liver| lung| lymph node| mammary gland| mouth| muscle| ovary| pancreas| pharynx| pituitary gland| placenta| prostate| skin| spleen| stomach| testis| thymus| thyroid| tonsil| trachea| umbilical cord| uterus| vascular| breast (mammary gland) tumo…	NM_001243650	GO:0030198	extracellular matrix organization	inferred from electronic annotation	NM_001243650	GO:0005578	proteinaceous extracellular matrix	inferred from electronic annotation	NM_001243650	GO:0016491	oxidoreductase activity	inferred from electronic annotation				ENST00000268797	Pfam	IPR000683	Oxidoreductase, N-terminal	4.93944	5.1627	5.20327	5.14043
TC08001360.hg.1	4.22126	4.85621	-1.55288	down	0.000184428	0.0558044	RNU11-6P	ENST00000391127	RNA, U11 small nuclear 6, pseudogene	snRNA	chr8	-	ENST00000391127	81661796	81661928	30			ENST00000391127	ENSEMBL	ncrna:known chromosome:GRCh38:8:80749561:80749693:-1 gene:ENSG00000212429 gene_biotype:snRNA transcript_biotype:snRNA																									4.35604	4.19013	4.2716	4.06728
TC19000544.hg.1	8.35984	9.40634	-2.06551	down	0.000185263	0.0558044	ZFP36	NM_003407	ZFP36 ring finger protein	protein_coding	chr19	+	NM_003407	39897487	39900047	30	19q13.1	7538	NM_003407	RefSeq	Homo sapiens ZFP36 ring finger protein (ZFP36), mRNA.	NM_003407	P26651	NM_003407	Hs.534052	adipose tissue| adrenal gland| ascites| bladder| blood| bone| bone marrow| brain| cervix| connective tissue| embryonic tissue| eye| heart| intestine| kidney| liver| lung| lymph| lymph node| mammary gland| muscle| nerve| ovary| pancreas| pharynx| pituitary gland| placenta| prostate| skin| spleen| stomach| testis| thymus| thyroid| uterus| vascular| bladder carcinoma| breast (mammary gland) tumor| c…	NM_003407	GO:0000122	negative regulation of transcription from RNA polymerase II promoter	inferred from mutant phenotype	NM_003407	GO:0005634	nucleus	inferred from direct assay	NM_003407	GO:0003677	DNA binding	inferred from electronic annotation				ENST00000248673	Pfam	IPR000571	Zinc finger, CCCH-type	8.25718	8.54308	8.36149	8.27761
TC01001793.hg.1	5.56713	5.97631	-1.32793	down	0.000187764	0.0558044	KCTD3	NM_016121	potassium channel tetramerization domain containing 3	protein_coding	chr1	+	NM_016121	215740735	215795149	327	1q41	51133	NM_016121	RefSeq	Homo sapiens potassium channel tetramerization domain containing 3 (KCTD3), mRNA.	NM_016121	Q9Y597	NM_016121	Hs.335139	adipose tissue| adrenal gland| bladder| blood| bone| bone marrow| brain| cervix| connective tissue| embryonic tissue| eye| heart| intestine| kidney| larynx| liver| lung| lymph node| mammary gland| mouth| muscle| nerve| ovary| pancreas| pharynx| pituitary gland| placenta| prostate| skin| stomach| testis| thymus| thyroid| uterus| vascular|adrenal tumor| bladder carcinoma| breast (mammary gland) tum…	NM_016121	GO:0051260	protein homooligomerization	inferred from electronic annotation					ENST00000259154	GO:0005515	protein binding	inferred from electronic annotation				ENST00000259154	Pfam	IPR003131	Potassium channel tetramerisation-type BTB domain	5.60623	5.64755	5.53028	5.48448
TC01006244.hg.1	4.78432	4.19828	1.50112	up	0.000188199	0.0558044	linc-AKT3-4	TCONS_00001899-XLOC_001288		ncRNA	chr1	-		244393073	244401962	27			TCONS_00001899-XLOC_001288	Rinn lincRNA	linc-AKT3-4 chr1:-:244393072-244401962																									4.66971	4.55985	4.95368	4.95405
TC14001461.hg.1	5.93527	5.18887	1.6776	up	0.000190563	0.0558044	ASB2	NM_001202429	ankyrin repeat and SOCS box containing 2	protein_coding	chr14	-	NM_001202429	94400499	94443137	210	14q31-q32	51676	NM_001202429	RefSeq	Homo sapiens ankyrin repeat and SOCS box containing 2 (ASB2), transcript variant 1, mRNA.	NM_001202429	Q96Q27	NM_001202429	Hs.510327	blood| brain| esophagus| heart| intestine| kidney| liver| lung| lymph| lymph node| mammary gland| mouth| muscle| ovary| pancreas| placenta| prostate| spleen| stomach| testis| thymus| trachea| uterus| breast (mammary gland) tumor| esophageal tumor| gastrointestinal tumor| germ cell tumor| kidney tumor| leukemia| lymphoma| normal| ovarian tumor| uterine tumor| fetus| adult	NM_001202429	GO:0000209	protein polyubiquitination	inferred from electronic annotation	NM_001202429	GO:0031466	Cul5-RING ubiquitin ligase complex	inferred from electronic annotation	NM_001202429	GO:0004842	ubiquitin-protein transferase activity	inferred from electronic annotation				ENST00000315988	Pfam	IPR001496	SOCS protein, C-terminal	5.92934	5.702	5.91998	6.18977
TC16002044.hg.1	4.15384	3.71021	1.36003	up	0.000193305	0.0558044	TP53TG3B	NM_001099687	TP53 target 3B	protein_coding	chr16	+	NM_001099687	33204980	33208179	93	16p11.2	729355	NM_001099687	RefSeq	Homo sapiens TP53 target 3B (TP53TG3B), transcript variant 1, mRNA.	NM_001099687	Q9ULZ0	NM_001099687	Hs.592038	bone marrow| brain| placenta| testis| leukemia| non-neoplasia| normal| adult					NM_001099687	GO:0005634	nucleus	inferred from electronic annotation												4.16567	4.08332	4.14001	4.22637
TC03001660.hg.1	2.81783	3.26746	-1.36568	down	0.000194963	0.0558044	WDR52	NM_001164496	WD repeat domain 52	protein_coding	chr3	-	NM_001164496	113005777	113160457	535	3q13.2	55779	NM_001164496	RefSeq	Homo sapiens WD repeat domain 52 (WDR52), transcript variant 1, mRNA.	NM_001164496	Q96MT7	NM_001164496	Hs.584936	adipose tissue| blood| bone| brain| connective tissue| ear| eye| heart| intestine| kidney| larynx| lung| lymph node| muscle| nerve| ovary| pharynx| placenta| prostate| skin| testis| thymus| thyroid| trachea| uterus| chondrosarcoma| colorectal tumor| germ cell tumor| head and neck tumor| kidney tumor| leukemia| normal| ovarian tumor| primitive neuroectodermal tumor of the CNS| prostate cancer| ski…									ENST00000295868	GO:0005515	protein binding	inferred from electronic annotation				ENST00000295868	Pfam	IPR001680	WD40 repeat	2.99346	2.76978	2.81175	2.69635
TC02000251.hg.1	5.54099	5.01337	1.44155	up	0.000195608	0.0558044	TMEM178A	NM_001167959	transmembrane protein 178A	protein_coding	chr2	+	NM_001167959	39892122	39945104	170	2p22.1	130733	NM_001167959	RefSeq	Homo sapiens transmembrane protein 178A (TMEM178A), transcript variant 2, mRNA.	NM_001167959	Q8NBL3	NM_001167959	Hs.40808	brain| embryonic tissue| eye| heart| intestine| kidney| larynx| lung| muscle| pancreas| placenta| prostate| uterus| glioma| head and neck tumor| non-neoplasia| normal| uterine tumor| blastocyst| fetus| adult					NM_001167959	GO:0016021	integral component of membrane	inferred from electronic annotation												5.75133	5.41506	5.45984	5.53771
TC13000009.hg.1	2.11874	1.6579	1.37634	up	0.000195693	0.0558044	RP11-442J17.3	OTTHUMT00000043993	novel transcript	ncRNA	chr13	+	OTTHUMT00000043993	19496029	19497905	30			OTTHUMT00000043993	Havana transcript	cdna:all chromosome:VEGA56:13:18921889:18923765:-1 Gene:OTTHUMG00000016470			ENST00000422082	Hs.578010	connective tissue| soft tissue/muscle tissue tumor| adult																				1.95907	2.06551	2.23095	2.21944
TC01005634.hg.1	3.88118	4.49564	-1.53099	down	0.000197243	0.0558044	CR609342	CR609342		ncRNA	chr1	-		93730202	93811405	319			CR609342	NONCODE	accn=CR609342 class=mRNAlike lncRNA name=Human lncRNA ref=JounralRNA transcriptId=475 cpcScore=-1.0883100 cnci=-0.2608609																									4.05325	3.93745	3.77283	3.76119
TC22000929.hg.1	5.47519	6.0409	-1.48011	down	0.000197547	0.0558044	linc-IL17RA-6	TCONS_l2_00017541-XLOC_l2_009280		ncRNA	chr22	+		17053606	17055481	40			TCONS_l2_00017541-XLOC_l2_009280	Broad TUCP	linc-IL17RA-6 chr22:+:17053605-17055481																									5.42857	5.3581	5.51533	5.59877
TC0X001356.hg.1	3.13032	2.7276	1.32199	up	0.000197718	0.0558044	RP4-537K23.4	OTTHUMT00000058219	putative novel transcript	antisense	chrX	-	OTTHUMT00000058219	129003040	129091504	40			OTTHUMT00000058219	Havana transcript	cdna:all chromosome:VEGA56:X:129869064:129957528:-1 Gene:OTTHUMG00000022377																									3.11305	3.06097	3.03506	3.31218
TC20001164.hg.1	2.62459	2.08578	1.45277	up	0.000198327	0.0558044	linc-TMEM90B-2	TCONS_00028138-XLOC_013496		ncRNA	chr20	+		24045120	24047430	16			TCONS_00028138-XLOC_013496	Rinn lincRNA	linc-TMEM90B-2 chr20:+:24045119-24047430																									2.57186	2.58079	2.52965	2.81606
TC15002722.hg.1	4.73782	6.04676	-2.4776	down	0.000198679	0.0558044	NR2F2-AS1	ENST00000502125	NR2F2 antisense RNA 1	antisense	chr15	-	ENST00000502125	96812001	96870577	100	15q26.2	644192	ENST00000502125	NONCODE	accn=NULL class=lncRNA name= ref=EnsemblNoncode transcriptId=ENST00000502125 cpcScore=-0.7278370 cnci=-0.2584156 gene:ENSG00000247809	ENST00000502125	Q6ZQY7	ENST00000502125	Hs.58690	brain| connective tissue| embryonic tissue| eye| kidney| liver| lung| muscle| placenta| prostate| spleen| testis| trachea| uterus| chondrosarcoma| germ cell tumor| normal| soft tissue/muscle tissue tumor| fetus| adult																				4.87642	4.96167	4.90305	4.21013
TC19002109.hg.1	4.40025	3.79587	1.52032	up	0.000198701	0.0558044	linc-TBCB	TCONS_l2_00012488-XLOC_l2_006709		ncRNA	chr19	+		36603674	36604503	30			TCONS_l2_00012488-XLOC_l2_006709	Broad TUCP	linc-TBCB chr19:+:36603673-36604503																									4.36234	4.19377	4.55598	4.48891
TC02004500.hg.1	6.15413	7.22146	-2.09555	down	0.00019882	0.0558044	RGPD6	EF491794	RANBP2-like and GRIP domain containing 6	protein_coding	chr2	-	EF491794	111290092	111291201	30	2q13	729540	EF491794	NONCODE	accn=EF491794 class=mRNAlike lncRNA name=NULL ref=H-invitational v7.5 transcriptId=HIT000395521_05 cpcScore=0.7508280 cnci=-0.1937681	EF491794	Q99666	EF491794	Hs.645445	adipose tissue| brain| cervix| embryonic tissue| eye| kidney| lung| placenta| testis| trachea| germ cell tumor| normal| blastocyst| fetus| adult	EF491794	GO:0000042	protein targeting to Golgi	inferred from electronic annotation	EF491794	GO:0005737	cytoplasm	inferred from electronic annotation	EF491794	GO:0008536	Ran GTPase binding	non-traceable author statement								6.39134	6.2698	5.93362	6.02177
TC08000577.hg.1	5.16631	5.61439	-1.36422	down	0.000201614	0.0558044	DPY19L4	NM_181787	dpy-19-like 4 (C. elegans)	protein_coding	chr8	+	NM_181787	95731931	95806076	298	8q22.1	286148	NM_181787	RefSeq	Homo sapiens dpy-19-like 4 (C. elegans) (DPY19L4), mRNA.	NM_181787	Q7Z388	NM_181787	Hs.567828	adipose tissue| blood| bone| brain| connective tissue| ear| embryonic tissue| eye| heart| intestine| kidney| liver| lung| lymph node| mammary gland| mouth| ovary| pancreas| pituitary gland| placenta| prostate| skin| stomach| testis| thymus| uterus| vascular| bladder carcinoma| breast (mammary gland) tumor| chondrosarcoma| colorectal tumor| gastrointestinal tumor| germ cell tumor| glioma| head and…	NM_181787	GO:0008152	metabolic process	inferred from electronic annotation	NM_181787	GO:0016021	integral component of membrane	inferred from electronic annotation	NM_181787	GO:0016757	transferase activity, transferring glycosyl groups	inferred from electronic annotation				ENST00000414645	Pfam	IPR018732	Dpy-19	5.22371	5.05303	5.22413	5.16438
TC09000473.hg.1	4.94268	4.49368	1.36509	up	0.000201745	0.0558044	RP11-180I4.2	OTTHUMT00000053238	putative novel transcript	ncRNA	chr9	+	OTTHUMT00000053238	98412436	98478000	30			OTTHUMT00000053238	Havana transcript	cdna:all chromosome:VEGA56:9:95650154:95715718:1 Gene:OTTHUMG00000020285			ENST00000422343	Hs.134153	bone| normal| primitive neuroectodermal tumor of the CNS| fetus																				4.84534	5.0543	4.96314	4.90796
TC13001721.hg.1	5.24236	5.66814	-1.3433	down	0.00020231	0.0558044	ERCC5	NM_000123	excision repair cross-complementation group 5	protein_coding	chr13	+	NM_000123	103497194	103528351	301	13q33	2073	NM_000123	RefSeq	Homo sapiens excision repair cross-complementation group 5 (ERCC5), mRNA.	NM_000123	P28715	NM_000123	Hs.258429	adipose tissue| ascites| bladder| blood| bone| bone marrow| brain| connective tissue| embryonic tissue| eye| heart| intestine| kidney| larynx| liver| lung| lymph node| mammary gland| mouth| muscle| ovary| pancreas| parathyroid| placenta| prostate| skin| spleen| stomach| testis| thymus| thyroid| tonsil| trachea| uterus| vascular| breast (mammary gland) tumor| chondrosarcoma| colorectal tumor| gast…	NM_000123	GO:0000718	nucleotide-excision repair, DNA damage removal	traceable author statement	NM_000123	GO:0005634	nucleus	inferred from direct assay	NM_000123	GO:0000405	bubble DNA binding	inferred from direct assay				ENST00000355739	Pfam	IPR006085	XPG N-terminal	5.27137	5.26513	5.23801	5.19493
TC06003705.hg.1	2.75861	2.34517	1.33185	up	0.000202311	0.0558044	ERVH-3	uc003pes.1	endogenous retrovirus group H, member 3	other	chr6	-	uc003pes.1	68590881	68599080	55	6q12	100289683	uc003pes.1	NONCODE	accn=NULL class=lncRNA name= ref=UCSCGeneNoncode transcriptId=uc003pes.1 cpcScore=2.0208500 cnci=-0.2369742	uc003pes.1	Q96CF1	uc003pes.1	Hs.289232	blood| bone| bone marrow| connective tissue| kidney| prostate| salivary gland| skin| testis| chondrosarcoma| germ cell tumor| kidney tumor| leukemia| prostate cancer| skin tumor| soft tissue/muscle tissue tumor| adult																				2.65039	2.82401	2.87432	2.6857
TC05001686.hg.1	2.98513	3.67353	-1.6115	down	0.000202439	0.0558044	CTC-428G20.3	OTTHUMT00000370998	novel transcript	other	chr5	-	OTTHUMT00000370998	114539713	114541943	30			OTTHUMT00000370998	Havana transcript	cdna:all chromosome:VEGA56:5:115204012:115206246:-1 Gene:OTTHUMG00000162912			ENST00000507241	Hs.594968	brain| connective tissue| eye| intestine| kidney| lung| lymph node| nerve| pancreas| skin| testis| thymus| uterus| vascular| chondrosarcoma| colorectal tumor| kidney tumor| normal| fetus| adult																				3.07267	2.93157	2.90966	3.02662
TC11002767.hg.1	4.48749	4.07578	1.33027	up	0.000206322	0.0558044	KRTAP5-10	AB126079	keratin associated protein 5-10	protein_coding	chr11	+	AB126079	71276609	71277666	30	11q13.4	387273	AB126079	NONCODE	accn=AB126079 class=mRNAlike lncRNA name=Human lncRNA ref=JounralRNA transcriptId=5276 cpcScore=0.7075720 cnci=-0.0854927	AB126079	Q6L8G5	AB126079	Hs.661887	uterus| normal| uterine tumor| adult					AB126079	GO:0045095	keratin filament	inferred from electronic annotation												4.35783	4.54154	4.49575	4.55486
TC04001545.hg.1	4.3538	4.92548	-1.48625	down	0.000206804	0.0558044	RP11-745L13.2	OTTHUMT00000364254	novel transcript	ncRNA	chr4	-	OTTHUMT00000364254	132851186	132897107	26			OTTHUMT00000364254	Havana transcript	cdna:all chromosome:VEGA56:4:131930031:131975952:-1 Gene:OTTHUMG00000161235			ENST00000510592	Hs.494020	normal| fetus																				4.45865	4.2774	4.27954	4.39961
TC08001491.hg.1	3.13477	2.49461	1.55851	up	0.000207515	0.0558044	KB-1930G5.3	OTTHUMT00000380525	putative novel transcript	ncRNA	chr8	-	OTTHUMT00000380525	102399527	102405414	30			OTTHUMT00000380525	Havana transcript	cdna:all chromosome:VEGA56:8:101387299:101393186:-1 Gene:OTTHUMG00000164831			ENST00000518612	Hs.561798	normal| fetus																				2.93069	3.11121	3.12974	3.36746
TC02003838.hg.1	5.64052	5.21103	1.34676	up	0.000207773	0.0558044	TUBA4B	NR_003063	tubulin, alpha 4b (pseudogene)	protein_coding	chr2	+	NR_003063	220117965	220136910	40	2q35	80086	NR_003063	NONCODE	accn=NR_003063 class=lncRNA name= ref=RefGeneNoncode transcriptId=NR_003063 cpcScore=11.4078000 cnci=-0.0956004	NR_003063	Q9H853	NR_003063	Hs.664469	brain| eye| lung| lymph| muscle| pharynx| placenta| salivary gland| stomach| testis| gastrointestinal tumor| germ cell tumor| head and neck tumor| lymphoma| normal| retinoblastoma| soft tissue/muscle tissue tumor| adult	NR_003063	GO:0007017	microtubule-based process	inferred from electronic annotation	NR_003063	GO:0005737	cytoplasm	inferred from electronic annotation	NR_003063	GO:0005200	structural constituent of cytoskeleton	inferred from electronic annotation								5.55213	5.67718	5.7111	5.62166
TC0X000103.hg.1	1.82928	2.50733	-1.59997	down	0.000208483	0.0558044	Mir_548	uc022btw.1		other	chrX	+		22191616	22191699	30			uc022btw.1	UCSC Genes	Rfam model RF01061 hit found at contig region Y10196.1/152516-152599																									2.10939	1.95791	1.64133	1.6085
TC19001818.hg.1	4.01499	3.58781	1.3446	up	0.000208547	0.0558044	LOC284379	NR_002938	solute carrier family 7 (cationic amino acid transporter, y+ system), member 3 pseudogene	pseudogene	chr19	-	NR_002938	54102885	54106751	40	19q13.42	284379	NR_002938	RefSeq	Homo sapiens solute carrier family 7 (cationic amino acid transporter, y+ system), member 3 pseudogene (LOC284379), non-coding RNA.			NR_002938	Hs.631571	bladder| brain| bladder carcinoma| normal| adult	NR_002938	GO:0003333	amino acid transmembrane transport	inferred from electronic annotation	NR_002938	GO:0016021	integral component of membrane	inferred from electronic annotation	NR_002938	GO:0015171	amino acid transmembrane transporter activity	inferred from electronic annotation								3.96859	3.99871	4.02054	4.07211
TC22000251.hg.1	3.99383	3.58184	1.33053	up	0.000208581	0.0558044	SC22CB-1D7.1	OTTHUMT00000320576	putative novel transcript	antisense	chr22	+	OTTHUMT00000320576	33716851	33718799	30			OTTHUMT00000320576	Havana transcript	cdna:all chromosome:VEGA56:22:33320865:33322813:1 Gene:OTTHUMG00000150925			ENST00000453924	Hs.581100	lymphoma																				3.99947	3.89731	4.12494	3.95361
TC08000902.hg.1	4.87529	6.62705	-3.3677	down	0.000209931	0.0558044	ANGPT2	NM_001118887	angiopoietin 2	protein_coding	chr8	-	NM_001118887	6357172	6420930	150	8p23.1	285	NM_001118887	RefSeq	Homo sapiens angiopoietin 2 (ANGPT2), transcript variant 2, mRNA.	NM_001118887	O15123	NM_001118887	Hs.583870	bone marrow| brain| connective tissue| embryonic tissue| eye| intestine| kidney| larynx| liver| lung| mammary gland| mouth| muscle| pancreas| pituitary gland| placenta| prostate| spleen| stomach| testis| thymus| thyroid| trachea| umbilical cord| uterus| vascular| colorectal tumor| gastrointestinal tumor| germ cell tumor| glioma| head and neck tumor| kidney tumor| leukemia| liver tumor| non-neopla…					NM_001118887	GO:0005576	extracellular region	traceable author statement	NM_001118887	GO:0005102	receptor binding	traceable author statement				ENST00000325203	Pfam	IPR002181	Fibrinogen, alpha/beta/gamma chain, C-terminal globular domain	4.45936	4.71922	5.41776	4.90481
TC0X000546.hg.1	4.381	5.10754	-1.65467	down	0.000210145	0.0558044	ALG13	NM_001039210	ALG13, UDP-N-acetylglucosaminyltransferase subunit	protein_coding	chrX	+	NM_001039210	110909043	111003877	578	Xq23	79868	NM_001039210	RefSeq	Homo sapiens ALG13, UDP-N-acetylglucosaminyltransferase subunit (ALG13), transcript variant 3, mRNA.	NM_001039210	Q9NP73	NM_001039210	Hs.443061	adipose tissue| adrenal gland| bladder| blood| bone marrow| brain| connective tissue| embryonic tissue| esophagus| eye| heart| intestine| kidney| liver| lung| lymph node| mammary gland| mouth| muscle| ovary| pancreas| parathyroid| pharynx| pituitary gland| placenta| prostate| stomach| testis| thymus| thyroid| trachea| uterus| vascular| bladder carcinoma| breast (mammary gland) tumor| chondrosarco…	NM_001039210	GO:0006488	dolichol-linked oligosaccharide biosynthetic process	traceable author statement	NM_001039210	GO:0005789	endoplasmic reticulum membrane	traceable author statement	NM_001039210	GO:0004577	N-acetylglucosaminyldiphosphodolichol N-acetylglucosaminyltransferase activity	inferred from electronic annotation				ENST00000251943	Pfam	IPR003323	Ovarian tumour, otubain	4.63483	4.49714	4.21608	4.17594
TC11002208.hg.1	4.40361	4.95169	-1.46214	down	0.000210584	0.0558044	FAM76B	NM_144664	family with sequence similarity 76, member B	protein_coding	chr11	-	NM_144664	95502106	95522955	188	11q21	143684	NM_144664	RefSeq	Homo sapiens family with sequence similarity 76, member B (FAM76B), mRNA.	NM_144664	Q5HYJ3	NM_144664	Hs.288304	adrenal gland| bladder| blood| bone| bone marrow| brain| connective tissue| embryonic tissue| eye| intestine| kidney| liver| lung| lymph node| mammary gland| mouth| muscle| ovary| pancreas| pharynx| placenta| prostate| stomach| testis| thymus| thyroid| uterus| vascular| chondrosarcoma| colorectal tumor| gastrointestinal tumor| germ cell tumor| head and neck tumor| kidney tumor| leukemia| liver tu…					NM_144664	GO:0005634	nucleus	inferred from direct assay												4.52453	4.51437	4.33075	4.24482
TC01005225.hg.1	5.34791	4.81749	1.44435	up	0.000210848	0.0558044	linc-MMEL1-1	TCONS_l2_00000991-XLOC_l2_000745		ncRNA	chr1	-		2568357	2574635	40			TCONS_l2_00000991-XLOC_l2_000745	Broad TUCP	linc-MMEL1-1 chr1:-:2568356-2574635																									5.17025	5.45512	5.3228	5.44347
TC15002113.hg.1	5.88181	5.20747	1.59587	up	0.000211193	0.0558044	linc-ARHGAP11B-2	TCONS_00023896-XLOC_011198		ncRNA	chr15	+		30240229	30241270	30			TCONS_00023896-XLOC_011198	Rinn lincRNA	linc-ARHGAP11B-2 chr15:+:30240228-30241270																									5.79054	5.9488	6.01965	5.76825
TC11000908.hg.1	4.24917	4.80259	-1.46756	down	0.000212987	0.0558044	KIAA1731	NM_033395	KIAA1731	protein_coding	chr11	+	NM_033395	93394805	93463522	380	11q21	85459	NM_033395	RefSeq	Homo sapiens KIAA1731 (KIAA1731), mRNA.	NM_033395	Q9C0D2	NM_033395	Hs.458418	bladder| blood| bone| brain| cervix| connective tissue| embryonic tissue| eye| heart| intestine| kidney| larynx| liver| lung| lymph node| mammary gland| mouth| muscle| ovary| placenta| prostate| skin| spleen| stomach| testis| thymus| trachea| uterus| breast (mammary gland) tumor| cervical tumor| chondrosarcoma| colorectal tumor| gastrointestinal tumor| germ cell tumor| kidney tumor| leukemia| liv…					NM_033395	GO:0005737	cytoplasm	inferred from direct assay												4.37927	4.19251	4.18653	4.23839
TC08001363.hg.1	2.04348	3.62857	-3.00025	down	0.00021354	0.0558044	PMP2	NM_002677	peripheral myelin protein 2	protein_coding	chr8	-	NM_002677	82352561	82359758	90	8q21.3-q22.1	5375	NM_002677	RefSeq	Homo sapiens peripheral myelin protein 2 (PMP2), mRNA.	NM_002677	P02689	NM_002677	Hs.571512	brain| ear| eye| intestine| kidney| lung| nerve| placenta| prostate| skin| testis| germ cell tumor| glioma| kidney tumor| non-neoplasia| normal| skin tumor| fetus| juvenile| adult	NM_002677	GO:0006810	transport	inferred from electronic annotation	NM_002677	GO:0005737	cytoplasm	inferred from electronic annotation	NM_002677	GO:0005215	transporter activity	inferred from electronic annotation				ENST00000256103	Pfam	IPR000566	Lipocalin/cytosolic fatty-acid binding domain	1.96679	1.93399	2.14429	2.12887
TC16001635.hg.1	3.74806	3.30304	1.36133	up	0.000214755	0.0558044	linc-PSMD7-3	TCONS_00024465-XLOC_011787		ncRNA	chr16	+		73846493	73849940	30			TCONS_00024465-XLOC_011787	Rinn lincRNA	linc-PSMD7-3 chr16:+:73846492-73849940																									3.70256	3.86553	3.67525	3.74889
TC03003231.hg.1	2.93925	2.52035	1.3369	up	0.000216317	0.0558044	linc-CCDC39-3	TCONS_l2_00019632-XLOC_l2_010451		ncRNA	chr3	-		180604459	180628232	30			TCONS_l2_00019632-XLOC_l2_010451	Broad TUCP	linc-CCDC39-3 chr3:-:180604458-180628232																									2.92786	2.96494	2.89026	2.97392
TC17000728.hg.1	4.31246	6.03914	-3.30966	down	0.000216995	0.0558044	MIR21	NR_029493	microRNA 21	miRNA	chr17	+	NR_029493	57918627	57918698	30	17q23.1	406991	NR_029493	RefSeq	Homo sapiens microRNA 21 (MIR21), microRNA.																									5.17362	4.33014	3.90821	3.83786
TC22000969.hg.1	4.05063	3.51359	1.45099	up	0.000217483	0.0558044	U84506	U84506		ncRNA	chr22	+		20012179	20012441	30			U84506	NONCODE	accn=U84506 class=mRNAlike lncRNA name=NULL ref=H-invitational v7.5 transcriptId=HIT000221869 cpcScore=-1.4376100 cnci=-0.2594267			U84506	Hs.684849																					4.11059	4.2079	3.70567	4.17835
TC10000241.hg.1	3.75393	3.31189	1.35852	up	0.000217542	0.0558044	GJD4	NM_153368	gap junction protein, delta 4, 40.1kDa	protein_coding	chr10	+	NM_153368	35894338	35897863	40	10p11.21	219770	NM_153368	RefSeq	Homo sapiens gap junction protein, delta 4, 40.1kDa (GJD4), mRNA.	NM_153368	Q96KN9	NM_153368	Hs.638922		NM_153368	GO:0007154	cell communication	inferred from electronic annotation	NM_153368	GO:0005922	connexon complex	inferred from electronic annotation								ENST00000321660	Pfam	IPR013092	Connexin, N-terminal	3.62641	3.77132	3.71513	3.90285
TC19001566.hg.1	8.11217	7.73053	1.30282	up	0.00021899	0.0558044	MIR4323	NR_036208	microRNA 4323	miRNA	chr19	-	NR_036208	42637597	42637665	30		100422980	NR_036208	RefSeq	Homo sapiens microRNA 4323 (MIR4323), microRNA.																									8.12085	8.15035	8.19968	7.97778
TC01000673.hg.1	6.09403	5.51108	1.49791	up	0.000219975	0.0558044	TMEM61	NM_182532	transmembrane protein 61	protein_coding	chr1	+	NM_182532	55446465	55457966	30	1p32.3	199964	NM_182532	RefSeq	Homo sapiens transmembrane protein 61 (TMEM61), mRNA.	NM_182532	Q8N0U2	NM_182532	Hs.663950	brain| connective tissue| kidney| lung| mammary gland| pancreas| pituitary gland| prostate| uterus| breast (mammary gland) tumor| normal| pancreatic tumor| prostate cancer| soft tissue/muscle tissue tumor| uterine tumor| adult					NM_182532	GO:0016021	integral component of membrane	inferred from electronic annotation												6.03026	6.03116	6.22787	6.08682
TC06001632.hg.1	3.84609	3.16473	1.60365	up	0.00022043	0.0558044	DQ577931	DQ577931	Homo sapiens piRNA piR-46043, complete sequence.	other	chr6	-		33849272	33849307	12			DQ577931	GenBank	Homo sapiens piRNA piR-46043, complete sequence.																									3.88891	3.96955	3.71858	3.80731
TC02000736.hg.1	4.02475	3.61825	1.32547	up	0.00022071	0.0558044	LINC01191	NR_034128	long intergenic non-protein coding RNA 1191	ncRNA	chr2	+	NR_034128	114737146	114764887	40	2q14.1	440900	NR_034128	RefSeq	Homo sapiens long intergenic non-protein coding RNA 1191 (LINC01191), long non-coding RNA.			NR_034128	Hs.662205	brain| connective tissue| lung| placenta| testis| germ cell tumor| normal| soft tissue/muscle tissue tumor| fetus| adult																				4.05301	3.93631	4.08628	4.02339
TC01000934.hg.1	5.17194	5.76152	-1.50481	down	0.000221029	0.0558044	STXBP3	NM_007269	syntaxin binding protein 3	protein_coding	chr1	+	NM_007269	109289285	109352148	278	1p13.3	6814	NM_007269	RefSeq	Homo sapiens syntaxin binding protein 3 (STXBP3), mRNA.	NM_007269	O00186	NM_007269	Hs.530436	adipose tissue| ascites| bladder| blood| bone| bone marrow| brain| cervix| connective tissue| embryonic tissue| esophagus| eye| heart| intestine| kidney| liver| lung| lymph node| mammary gland| mouth| muscle| ovary| pancreas| parathyroid| pharynx| pituitary gland| placenta| prostate| salivary gland| skin| spleen| stomach| testis| thymus| thyroid| trachea| uterus| vascular| bladder carcinoma| brea…	NM_007269	GO:0006904	vesicle docking involved in exocytosis	inferred from electronic annotation	NM_007269	GO:0005829	cytosol	inferred from direct assay	NM_007269	GO:0005515	protein binding	inferred from physical interaction				ENST00000370008	Pfam	IPR001619	Sec1-like protein	5.17788	5.17093	5.06241	5.27654
TC02000348.hg.1	5.99172	6.75482	-1.69714	down	0.000221781	0.0558044	REL	NM_002908	v-rel avian reticuloendotheliosis viral oncogene homolog	protein_coding	chr2	+	NM_002908	61108656	61150645	150	2p13-p12	5966	NM_002908	RefSeq	Homo sapiens v-rel avian reticuloendotheliosis viral oncogene homolog (REL), transcript variant 1, mRNA.	NM_002908	Q04864	NM_002908	Hs.631886	blood| brain| embryonic tissue| intestine| kidney| larynx| liver| lung| lymph| lymph node| mammary gland| mouth| placenta| thymus| thyroid| trachea| breast (mammary gland) tumor| colorectal tumor| head and neck tumor| leukemia| lymphoma| normal| blastocyst| fetus| adult	NM_002908	GO:0001816	cytokine production	inferred from electronic annotation	NM_002908	GO:0005654	nucleoplasm	traceable author statement	NM_002908	GO:0000980	RNA polymerase II distal enhancer sequence-specific DNA binding	inferred from direct assay				ENST00000394479	Pfam	IPR011539	Rel homology domain	6.13293	6.15975	5.99041	5.68378
TC17002431.hg.1	2.75782	2.30773	1.36612	up	0.000221955	0.0558044	uc010wxm.1	uc010wxm.1		ncRNA	chr17	-		891435	894424	30			uc010wxm.1	NONCODE	accn=NULL class=lncRNA name= ref=UCSCGeneNoncode transcriptId=uc010wxm.1 cpcScore=0.4450900 cnci=-0.2229595																									2.68219	2.85294	2.63764	2.85851
TC12002302.hg.1	4.15583	3.618	1.45179	up	0.000222871	0.0558044	LOC645485	BC039526	uncharacterized LOC645485	ncRNA	chr12	+	BC039526	30908008	30933673	30	12p11.21	645485	BC039526	NONCODE	accn=BC039526 class=mRNAlike lncRNA name=Human lncRNA ref=JounralRNA transcriptId=4360 cpcScore=-0.8394280 cnci=-0.2546647			BC039526	Hs.232332	brain| testis| germ cell tumor| normal| adult																				4.02733	4.09206	4.23216	4.27177
TC10002565.hg.1	5.74629	5.3327	1.33199	up	0.000223671	0.0558044	linc-ZNF25-2	TCONS_00018486-XLOC_008784		ncRNA	chr10	-		38736775	38739473	30			TCONS_00018486-XLOC_008784	Rinn lincRNA	linc-ZNF25-2 chr10:-:38736774-38739473																									5.68024	5.78735	5.85842	5.65913
TC20000335.hg.1	7.29277	6.34339	1.93104	up	0.000224016	0.0558044	WISP2	NM_003881	WNT1 inducible signaling pathway protein 2	protein_coding	chr20	+	NM_003881	43343485	43357150	140	20q13.12	8839	NM_003881	RefSeq	Homo sapiens WNT1 inducible signaling pathway protein 2 (WISP2), mRNA.	NM_003881	O76076	NM_003881	Hs.592145	adrenal gland| blood| bone| brain| cervix| connective tissue| intestine| liver| lung| lymph node| mammary gland| muscle| ovary| pancreas| prostate| skin| spleen| testis| thyroid| uterus| breast (mammary gland) tumor| chondrosarcoma| lung tumor| lymphoma| non-neoplasia| normal| ovarian tumor| pancreatic tumor| prostate cancer| fetus| adult	NM_003881	GO:0001558	regulation of cell growth	inferred from electronic annotation	NM_003881	GO:0005615	extracellular space	inferred from direct assay	NM_003881	GO:0005520	insulin-like growth factor binding	inferred from electronic annotation				ENST00000190983	Pfam	IPR000867	Insulin-like growth factor-binding protein, IGFBP	7.16808	6.97655	7.2979	7.72854
TC07003060.hg.1	5.32361	6.28611	-1.94868	down	0.000224641	0.0558044	FAM133DP	NR_034169	family with sequence similarity 133, member A pseudogene	pseudogene	chr7	-	NR_034169	92190368	92219696	90	2q24.1	728066	NR_034169	NONCODE	accn=NR_034169 class=lncRNA name= ref=RefGeneNoncode transcriptId=NR_034169 cpcScore=2.5903300 cnci=-0.4565193	NR_034169	Q5BKY9	NR_034169	Hs.470311	adrenal gland| ascites| bone marrow| brain| connective tissue| embryonic tissue| eye| intestine| kidney| liver| lung| lymph node| mammary gland| ovary| pancreas| parathyroid| salivary gland| testis| thyroid| uterus| vascular| breast (mammary gland) tumor| colorectal tumor| gastrointestinal tumor| germ cell tumor| head and neck tumor| kidney tumor| leukemia| non-neoplasia| normal| ovarian tumor| p…									NR_034169	GO:0044822	poly(A) RNA binding	inferred from direct assay								5.45118	5.41814	5.03269	5.39245
TC07001257.hg.1	2.01083	1.61725	1.31365	up	0.000225995	0.0558044	LOC100130673	NR_038454	phosphoribosyl pyrophosphate synthetase 2 pseudogene	pseudogene	chr7	-	NR_038454	32496510	32498106	30	7p14.3	100130673	NR_038454	RefSeq	Homo sapiens phosphoribosyl pyrophosphate synthetase 2 pseudogene (LOC100130673), non-coding RNA.			NR_038454	Hs.609282	lung| lung tumor																				1.98467	2.04918	1.89085	2.11861
TC01001741.hg.1	6.10121	6.85335	-1.68429	down	0.00022702	0.0558044	CD46	NM_002389	CD46 molecule, complement regulatory protein	protein_coding	chr1	+	NM_002389	207925383	207968861	297	1q32	4179	NM_002389	RefSeq	Homo sapiens CD46 molecule, complement regulatory protein (CD46), transcript variant a, mRNA.	NM_002389	P15529	NM_002389	Hs.510402	adipose tissue| adrenal gland| ascites| bladder| blood| bone| bone marrow| brain| cervix| connective tissue| ear| embryonic tissue| esophagus| eye| heart| intestine| kidney| liver| lung| lymph node| mammary gland| mouth| muscle| nerve| ovary| pancreas| parathyroid| pharynx| pituitary gland| placenta| prostate| salivary gland| skin| spleen| stomach| testis| thymus| thyroid| trachea| uterus| vascul…									NM_002389	GO:0001848	complement binding	inferred from electronic annotation				ENST00000322918	Pfam	IPR000436	Sushi/SCR/CCP	6.29758	6.15678	6.01882	5.93166
TC16000068.hg.1	7.07994	6.65241	1.34492	up	0.000227027	0.0558044	MIR3677	NR_037448	microRNA 3677	miRNA	chr16	+	NR_037448	2320714	2320773	30		100500812	NR_037448	RefSeq	Homo sapiens microRNA 3677 (MIR3677), microRNA.																									7.0256	7.2395	7.0485	7.00615
TC10000199.hg.1	6.85141	5.53517	2.49015	up	0.000227153	0.0558044	BAMBI	NM_012342	BMP and activin membrane-bound inhibitor	protein_coding	chr10	+	NM_012342	28966271	28971868	104	10p12.3-p11.2	25805	NM_012342	RefSeq	Homo sapiens BMP and activin membrane-bound inhibitor (BAMBI), mRNA.	NM_012342	Q13145	NM_012342	Hs.533336	adrenal gland| ascites| bladder| bone| brain| connective tissue| ear| embryonic tissue| eye| heart| intestine| kidney| liver| lung| lymph| mammary gland| ovary| pancreas| placenta| prostate| skin| stomach| testis| uterus| vascular| bladder carcinoma| breast (mammary gland) tumor| chondrosarcoma| colorectal tumor| gastrointestinal tumor| germ cell tumor| glioma| kidney tumor| lymphoma| non-neoplas…	NM_012342	GO:0007179	transforming growth factor beta receptor signaling pathway	traceable author statement	NM_012342	GO:0005737	cytoplasm	inferred from direct assay	NM_012342	GO:0005109	frizzled binding	inferred from physical interaction				ENST00000375533	Pfam	IPR000472	TGF-beta receptor/activin receptor, type I/II	6.68562	7.27971	6.06043	7.37986
TC16000830.hg.1	5.89969	5.41401	1.40025	up	0.000227237	0.0558044	CDIP1	NM_001199054	cell death-inducing p53 target 1	protein_coding	chr16	-	NM_001199054	4560676	4588816	120	16p13.3	29965	NM_001199054	RefSeq	Homo sapiens cell death-inducing p53 target 1 (CDIP1), transcript variant 1, mRNA.	NM_001199054	Q9H305	NM_001199054	Hs.654653	ascites| blood| bone| bone marrow| brain| cervix| connective tissue| embryonic tissue| eye| heart| intestine| kidney| larynx| liver| lung| lymph node| mammary gland| mouth| muscle| nerve| ovary| pancreas| pharynx| pituitary gland| placenta| prostate| skin| spleen| stomach| testis| thymus| thyroid| tonsil| uterus| cervical tumor| chondrosarcoma| gastrointestinal tumor| germ cell tumor| glioma| hea…	NM_001199054	GO:0006915	apoptotic process	inferred from genetic interaction	NM_001199054	GO:0005634	nucleus	inferred from direct assay	NM_001199054	GO:0003674	molecular_function	no biological data available				ENST00000399599	Pfam	IPR006629	LPS-induced tumor necrosis factor alpha factor	5.74648	5.83045	5.98494	6.0369
TC07002896.hg.1	2.92391	2.47438	1.3656	up	0.000227472	0.0558044	uc003tgm.1	uc003tgm.1		ncRNA	chr7	-		38342349	38344378	30			uc003tgm.1	NONCODE	accn=NULL class=lncRNA name= ref=UCSCGeneNoncode transcriptId=uc003tgm.1 cpcScore=-0.8402980 cnci=-0.3167304																									2.89461	2.99853	2.98661	2.81591
TC07003205.hg.1	5.33121	4.81572	1.42948	up	0.000228399	0.0558044	M14260	M14260		ncRNA	chr7	-		142099461	142099938	30			M14260	NONCODE	accn=M14260 class=mRNAlike lncRNA name=NULL ref=H-invitational v7.5 transcriptId=HIT000194315 cpcScore=1.9278200 cnci=-0.0756172			M14260	Hs.534418	thymus																				5.25961	5.38298	5.15846	5.52381
TC04000052.hg.1	7.58373	6.80766	1.71247	up	0.000228897	0.0558044	ADRA2C	NM_000683	adrenoceptor alpha 2C	protein_coding	chr4	+	NM_000683	3768075	3770253	50	4p16	152	NM_000683	RefSeq	Homo sapiens adrenoceptor alpha 2C (ADRA2C), mRNA.	NM_000683	P18825	NM_000683	Hs.123022	brain| connective tissue| embryonic tissue| heart| kidney| mammary gland| ovary| pancreas| placenta| testis| trachea| uterus| breast (mammary gland) tumor| glioma| kidney tumor| normal| ovarian tumor| pancreatic tumor| primitive neuroectodermal tumor of the CNS| uterine tumor|embryoid body| fetus| adult	NM_000683	GO:0006112	energy reserve metabolic process	traceable author statement	NM_000683	GO:0005737	cytoplasm	inferred from direct assay	NM_000683	GO:0004938	alpha2-adrenergic receptor activity	inferred from direct assay	NM_000683	GenMAPP	GPCRDB_Class_A_Rhodopsin-like	ENST00000330055	Pfam	IPR000276	G protein-coupled receptor, rhodopsin-like	7.61602	7.46004	7.57328	7.68559
TC07001296.hg.1	2.77531	2.26284	1.42648	up	0.000230808	0.0558044	AK096766	AK096766	Homo sapiens cDNA FLJ39447 fis, clone PROST2007416.	other	chr7	-		38342349	38344378	30			AK096766	GenBank	Homo sapiens cDNA FLJ39447 fis, clone PROST2007416.			AK096766	Hs.663474	blood| prostate| spleen| normal																				2.78725	2.54347	2.89194	2.87856
TC08001423.hg.1	4.51379	5.07043	-1.47084	down	0.000231263	0.0558044	TRIQK	NM_001171795	triple QxxK/R motif containing	protein_coding	chr8	-	NM_001171795	93895758	94029901	296	8q22.1	286144	NM_001171795	RefSeq	Homo sapiens triple QxxK/R motif containing (TRIQK), transcript variant 3, mRNA.	NM_001171795	Q629K1	NM_001171795	Hs.440643	adipose tissue| bladder| blood| bone| brain| connective tissue| embryonic tissue| esophagus| eye| heart| intestine| kidney| liver| lung| mammary gland| muscle| nerve| ovary| pancreas| parathyroid| pituitary gland| placenta| prostate| skin| spleen| stomach| testis| thymus| trachea| uterus| vascular| bladder carcinoma| breast (mammary gland) tumor| chondrosarcoma| esophageal tumor| gastrointestinal…					NM_001171795	GO:0005789	endoplasmic reticulum membrane	inferred from electronic annotation												4.49749	4.38947	4.6117	4.55652
TC13001592.hg.1	4.22055	5.46673	-2.37212	down	0.000232284	0.0558044	RBM26	BC043240	RNA binding motif protein 26	protein_coding	chr13	-	BC043240	79886132	79888263	50	13q31.1	64062	BC043240	NONCODE	accn=BC043240 class=mRNAlike lncRNA name=Human lncRNA ref=JounralRNA transcriptId=1210 cpcScore=-1.0316700 cnci=-0.4272625	BC043240	Q5T8P6	BC043240	Hs.558528	adipose tissue| adrenal gland| ascites| bladder| blood| bone| bone marrow| brain| connective tissue| ear| embryonic tissue| eye| heart| intestine| kidney| larynx| liver| lung| lymph| lymph node| mammary gland| mouth| muscle| ovary| pancreas| parathyroid| pharynx| pituitary gland| placenta| prostate| skin| spleen| stomach| testis| thymus| trachea| uterus| vascular| bladder carcinoma| breast (mamma…	BC043240	GO:0006397	mRNA processing	inferred from electronic annotation					BC043240	GO:0000166	nucleotide binding	inferred from electronic annotation								4.58127	4.2698	4.04392	3.98722
TC16000662.hg.1	4.69586	4.21588	1.39473	up	0.000232903	0.0558044	LOC400548	NR_033984	uncharacterized LOC400548	ncRNA	chr16	+	NR_033984	85170756	85183049	30	16q24.1	400548	NR_033984	RefSeq	Homo sapiens uncharacterized LOC400548 (LOC400548), long non-coding RNA.			NR_033984	Hs.592054	thymus																				4.81408	4.63064	4.83648	4.50225
TC14001501.hg.1	2.82623	2.37678	1.36552	up	0.000233094	0.0558044	RP11-543C4.3	ENST00000555875		ncRNA	chr14	-		100157782	100159985	26			ENST00000555875	ENSEMBL	havana:known chromosome:GRCh38:14:99691445:99693648:-1 gene:ENSG00000258672 gene_biotype:lincRNA transcript_biotype:lincRNA			ENST00000555875	Hs.578111	testis| normal																				2.65689	3.02137	2.80656	2.8201
TC01000720.hg.1	3.03253	3.43107	-1.31817	down	0.000235476	0.0558044	EFCAB7	NM_032437	EF-hand calcium binding domain 7	protein_coding	chr1	+	NM_032437	63989013	64038364	240	1p31.3	84455	NM_032437	RefSeq	Homo sapiens EF-hand calcium binding domain 7 (EFCAB7), mRNA.	NM_032437	A8K855	NM_032437	Hs.652324	bone| bone marrow| brain| cervix| connective tissue| embryonic tissue| esophagus| eye| intestine| kidney| liver| lung| lymph node| mammary gland| muscle| nerve| pancreas| pharynx| pituitary gland| placenta| skin| testis| thyroid| uterus| vascular| chondrosarcoma| colorectal tumor| esophageal tumor| germ cell tumor| glioma| head and neck tumor| kidney tumor| leukemia| liver tumor| normal| pancreat…									NM_032437	GO:0005509	calcium ion binding	inferred from electronic annotation								3.09207	2.97598	3.01748	3.04458
TC10001834.hg.1	3.88563	3.38374	1.41606	up	0.000238202	0.0558044	RP11-184A2.2	OTTHUMT00000046493	putative novel transcript	antisense	chr10	+	OTTHUMT00000046493	3800107	3800943	30			OTTHUMT00000046493	NONCODE	accn=NULL class=mRNAlike lncRNA name=vega lncRNA ref=GENCODE transcriptId=OTTHUMT00000046493 cpcScore=-0.4594020 cnci=-0.0989539 gene:OTTHUMG00000017565																									3.89457	3.93438	3.89275	3.82083
TC04002922.hg.1	4.06018	5.13231	-2.10255	down	0.000239775	0.0558044	RASGEF1B	NM_152545	RasGEF domain family, member 1B	protein_coding	chr4	-	NM_152545	82347547	82393082	260	4q21.21	153020	NM_152545	RefSeq	Homo sapiens RasGEF domain family, member 1B (RASGEF1B), mRNA.	NM_152545	Q0VAM2	NM_152545	Hs.591696	adrenal gland| bladder| blood| brain| connective tissue| embryonic tissue| esophagus| eye| intestine| kidney| liver| lung| lymph node| mouth| ovary| placenta| prostate| skin| thymus| uterus|adrenal tumor| chondrosarcoma| esophageal tumor| germ cell tumor| glioma| kidney tumor| liver tumor| non-neoplasia| normal| ovarian tumor| fetus| adult	NM_152545	GO:0007264	small GTPase mediated signal transduction	inferred from electronic annotation	NM_152545	GO:0005769	early endosome	inferred from electronic annotation	NM_152545	GO:0005088	Ras guanyl-nucleotide exchange factor activity	inferred from direct assay				ENST00000335927	Pfam	IPR001895	Ras guanine-nucleotide exchange factors catalytic domain	4.14513	4.28233	4.01088	3.80236
TC14001471.hg.1	3.93751	3.53542	1.32142	up	0.000239899	0.0558044	RP11-991C1.1	ENST00000553435		ncRNA	chr14	-		95426614	95429313	50			ENST00000553435	ENSEMBL	havana:known chromosome:GRCh38:14:94960277:94962976:-1 gene:ENSG00000258933 gene_biotype:lincRNA transcript_biotype:lincRNA			ENST00000553435	Hs.448541	eye| normal																				4.07406	3.80596	3.94923	3.92081
TC19001684.hg.1	5.69477	5.29732	1.31718	up	0.000240668	0.0558044	LMTK3	NM_001080434	lemur tyrosine kinase 3	protein_coding	chr19	-	NM_001080434	48988528	49016446	160	19q13.33	114783	NM_001080434	RefSeq	Homo sapiens lemur tyrosine kinase 3 (LMTK3), mRNA.	NM_001080434	Q96Q04	NM_001080434	Hs.207426	brain| embryonic tissue| intestine| kidney| nerve| testis| colorectal tumor| germ cell tumor| glioma| normal|embryoid body| fetus| juvenile| adult	NM_001080434	GO:0010923	negative regulation of phosphatase activity	inferred from direct assay	NM_001080434	GO:0016021	integral component of membrane	inferred from electronic annotation	NM_001080434	GO:0004674	protein serine/threonine kinase activity	inferred from electronic annotation				ENST00000270238	Pfam	IPR000719	Protein kinase domain	5.62223	5.65998	5.82918	5.66769
TC07001685.hg.1	4.54467	4.20388	1.26645	up	0.000241361	0.0558044	MOGAT3	NM_178176	monoacylglycerol O-acyltransferase 3	protein_coding	chr7	-	NM_178176	100838288	100844302	110	7q22.1	346606	NM_178176	RefSeq	Homo sapiens monoacylglycerol O-acyltransferase 3 (MOGAT3), transcript variant 1, mRNA.	NM_178176	Q86VF5	NM_178176	Hs.512217	intestine| colorectal tumor| liver tumor| normal| fetus| juvenile	NM_178176	GO:0006071	glycerol metabolic process	inferred from electronic annotation	NM_178176	GO:0005789	endoplasmic reticulum membrane	inferred from electronic annotation	NM_178176	GO:0003846	2-acylglycerol O-acyltransferase activity	inferred from electronic annotation				ENST00000223114	Pfam	IPR007130	Diacylglycerol acyltransferase	4.53125	4.58226	4.48652	4.57866
TC06002143.hg.1	5.58621	6.26855	-1.60474	down	0.000241436	0.0558044	BCLAF1	NM_001077440	BCL2-associated transcription factor 1	protein_coding	chr6	-	NM_001077440	136578001	136610989	290	6q22-q23	9774	NM_001077440	RefSeq	Homo sapiens BCL2-associated transcription factor 1 (BCLAF1), transcript variant 2, mRNA.	NM_001077440	Q9NYF8	NM_001077440	Hs.486542	ascites| bladder| blood| bone| bone marrow| brain| cervix| connective tissue| ear| embryonic tissue| eye| heart| intestine| kidney| larynx| liver| lung| lymph| lymph node| mammary gland| mouth| muscle| nerve| ovary| pancreas| parathyroid| pharynx| placenta| prostate| skin| spleen| stomach| testis| thymus| thyroid| trachea| uterus| vascular| bladder carcinoma| breast (mammary gland) tumor| cervica…					NM_001077440	GO:0005634	nucleus	inferred from direct assay	NM_001077440	GO:0003677	DNA binding	inferred from direct assay								5.65501	5.65091	5.45578	5.58315
TC12002250.hg.1	4.69287	5.51361	-1.7663	down	0.000241653	0.0558044	AF086507	AF086507		ncRNA	chr12	+		12632120	12632530	30			AF086507	NONCODE	accn=AF086507 class=mRNAlike lncRNA name=Human lncRNA ref=JounralRNA transcriptId=4308 cpcScore=-1.0553800 cnci=-0.2580456			AF086507	Hs.621475																					4.69514	4.60243	4.8245	4.64943
TC19002521.hg.1	5.65374	6.53536	-1.84243	down	0.000242868	0.0558044	ENST00000501583	ENST00000501583		ncRNA	chr19	-		45976341	45978414	19			ENST00000501583	NONCODE	accn=NULL class=lncRNA name= ref=EnsemblNoncode transcriptId=ENST00000501583 cpcScore=-1.1092200 cnci=-0.1697273																									5.74876	5.85979	5.42879	5.57764
TC01003587.hg.1	2.88839	2.39963	1.40323	up	0.000243979	0.0558044	RP11-12M5.4	OTTHUMT00000085303	novel transcript	ncRNA	chr1	-	OTTHUMT00000085303	179798744	179805259	30			OTTHUMT00000085303	Havana transcript	cdna:all chromosome:VEGA56:1:179829609:179836124:-1 Gene:OTTHUMG00000035264																									2.81763	3.06281	2.71348	2.95963
TC17002801.hg.1	4.47122	4.02737	1.36023	up	0.000245411	0.0558044	linc-SOCS3-1	TCONS_l2_00011480-XLOC_l2_006205		ncRNA	chr17	-		76480976	76488723	60			TCONS_l2_00011480-XLOC_l2_006205	Broad TUCP	linc-SOCS3-1 chr17:-:76480975-76482058																									4.33913	4.58254	4.41992	4.5433
TC05003444.hg.1	4.6803	5.38485	-1.62963	down	0.000248223	0.0558044	AC138035.1	OTTHUMT00000371259	novel transcript	ncRNA	chr5	+	OTTHUMT00000371259	180756242	180769214	30			OTTHUMT00000371259	Havana transcript	cdna:all chromosome:VEGA56:5:181329241:181342213:1 Gene:OTTHUMG00000162985			ENST00000509192	Hs.684307																					4.8337	4.58278	4.7132	4.59154
TC11000046.hg.1	5.37933	5.00481	1.29641	up	0.00024894	0.0558044	KRTAP5-5	NM_001001480	keratin associated protein 5-5	protein_coding	chr11	+	NM_001001480	1651005	1652160	64	11p15.5	439915	NM_001001480	RefSeq	Homo sapiens keratin associated protein 5-5 (KRTAP5-5), mRNA.	NM_001001480	Q701N2	NM_001001480	Hs.653467	heart| normal| fetus					NM_001001480	GO:0045095	keratin filament	inferred from electronic annotation												5.34688	5.34969	5.38781	5.43294
TC17002394.hg.1	4.84035	4.39359	1.36298	up	0.000249241	0.0558044	linc-C1QTNF1-5	TCONS_l2_00010998-XLOC_l2_005915		ncRNA	chr17	+		76480956	76487012	40			TCONS_l2_00010998-XLOC_l2_005915	Broad TUCP	linc-C1QTNF1-5 chr17:+:76480955-76487012																									4.78787	4.91436	4.86994	4.78922
TC05000302.hg.1	4.40359	4.87074	-1.38238	down	0.000250833	0.0558044	RAD17	NM_002873	RAD17 homolog (S. pombe)	protein_coding	chr5	+	NM_002873	68665120	68710630	395	5q13	5884	NM_002873	RefSeq	Homo sapiens RAD17 homolog (S. pombe) (RAD17), transcript variant 8, mRNA.	NM_002873	O75943	NM_002873	Hs.16184	adrenal gland| ascites| bladder| blood| bone| bone marrow| brain| cervix| connective tissue| embryonic tissue| eye| intestine| kidney| liver| lung| lymph node| mammary gland| mouth| muscle| ovary| pancreas| pharynx| pituitary gland| placenta| prostate| skin| spleen| stomach| testis| thymus| thyroid| tonsil| trachea| uterus|adrenal tumor| bladder carcinoma| breast (mammary gland) tumor| chondrosar…					NM_002873	GO:0000781	chromosome, telomeric region	inferred from direct assay	NM_002873	GO:0005515	protein binding	inferred from physical interaction				ENST00000282891	Pfam	IPR003959	ATPase, AAA-type, core	4.3706	4.46928	4.32823	4.44623
TC17001112.hg.1	4.88204	4.47546	1.32554	up	0.000251968	0.0558044	SLC25A35	NM_201520	solute carrier family 25, member 35	protein_coding	chr17	-	NM_201520	8191081	8198661	140	17p13.1	399512	NM_201520	RefSeq	Homo sapiens solute carrier family 25, member 35 (SLC25A35), mRNA.	NM_201520	Q3KQZ1	NM_201520	Hs.118918	blood| bone| bone marrow| brain| cervix| embryonic tissue| eye| intestine| kidney| liver| lung| lymph node| mammary gland| muscle| ovary| pancreas| placenta| prostate| skin| testis| thymus| thyroid| trachea| uterus| breast (mammary gland) tumor| cervical tumor| chondrosarcoma| glioma| head and neck tumor| leukemia| liver tumor| non-neoplasia| normal| pancreatic tumor| prostate cancer| uterine tum…	NM_201520	GO:0006810	transport	inferred from electronic annotation	NM_201520	GO:0005743	mitochondrial inner membrane	inferred from electronic annotation								ENST00000380067	Pfam	IPR018108	Mitochondrial substrate/solute carrier	4.83444	4.82342	4.99146	4.87886
TC11002057.hg.1	5.40032	5.05747	1.26826	up	0.000252383	0.0558044	LOC220077	ENST00000441510	dedicator of cytokinesis 1 pseudogene	pseudogene	chr11	-	ENST00000441510	71961617	71961916	30	11q13.4	220077	ENST00000441510	ENSEMBL	[retired]cdna:pseudogene chromosome:GRCh37:11:71961617:71961916:-1 gene:ENSG00000228286 gene_biotype:pseudogene transcript_biotype:processed_pseudogene																									5.46503	5.37478	5.37115	5.3903
TC01002800.hg.1	5.56744	6.09516	-1.44165	down	0.000253595	0.0558044	USP33	NM_015017	ubiquitin specific peptidase 33	protein_coding	chr1	-	NM_015017	78161672	78225537	392	1p31.1	23032	NM_015017	RefSeq	Homo sapiens ubiquitin specific peptidase 33 (USP33), transcript variant 1, mRNA.	NM_015017	Q8TEY7	NM_015017	Hs.480597	adrenal gland| bladder| blood| bone| bone marrow| brain| cervix| connective tissue| ear| embryonic tissue| esophagus| eye| heart| intestine| kidney| liver| lung| lymph| lymph node| mammary gland| mouth| muscle| nerve| ovary| pancreas| pituitary gland| placenta| prostate| skin| spleen| stomach| testis| thymus| thyroid| trachea| uterus| vascular|adrenal tumor| bladder carcinoma| breast (mammary gla…	NM_015017	GO:0006511	ubiquitin-dependent protein catabolic process	traceable author statement	NM_015017	GO:0005737	cytoplasm	traceable author statement	NM_015017	GO:0001664	G-protein coupled receptor binding	inferred from physical interaction				ENST00000370792	Pfam	IPR001394	Peptidase C19, ubiquitin carboxyl-terminal hydrolase	5.55502	5.65224	5.49342	5.5691
TC12001215.hg.1	4.03619	4.96375	-1.90205	down	0.000254214	0.0558044	CLEC7A	NM_022570	C-type lectin domain family 7, member A	protein_coding	chr12	-	NM_022570	10269376	10282868	208	12p13.2	64581	NM_022570	RefSeq	Homo sapiens C-type lectin domain family 7, member A (CLEC7A), transcript variant 2, mRNA.	NM_022570	Q9BXN2	NM_022570	Hs.143929	bladder| blood| bone marrow| brain| intestine| larynx| lung| mammary gland| muscle| placenta| spleen| thymus| thyroid| trachea| vascular| bladder carcinoma| breast (mammary gland) tumor| head and neck tumor| leukemia| lymphoma| non-neoplasia| normal| neonate| adult					NM_022570	GO:0005737	cytoplasm	inferred from electronic annotation	NM_022570	GO:0001846	opsonin binding	inferred from electronic annotation				ENST00000298523	Pfam	IPR008646	Herpesvirus UL45-like	4.19085	3.95936	4.12005	3.87451
TC10002022.hg.1	3.8198	3.3885	1.34845	up	0.000254374	0.0558044	linc-BMS1-7	TCONS_l2_00002997-XLOC_l2_001563		ncRNA	chr10	+		42737724	42772399	78			TCONS_l2_00002997-XLOC_l2_001563	Broad TUCP	linc-BMS1-7 chr10:+:42737723-42772282																									3.72641	3.73252	3.9593	3.86097
TC0X001881.hg.1	2.40699	3.09716	-1.61347	down	0.000254532	0.0558044	linc-ZNF449-2	TCONS_00017250-XLOC_008072		ncRNA	chrX	+		134169666	134174761	30			TCONS_00017250-XLOC_008072	Rinn lincRNA	linc-ZNF449-2 chrX:+:134169665-134174761																									2.16299	2.28824	2.65354	2.52319
TC10000726.hg.1	4.65429	5.07785	-1.34124	down	0.000254536	0.0558044	FAM178A	NM_001136123	family with sequence similarity 178, member A	protein_coding	chr10	+	NM_001136123	102672326	102724893	273	10q24.31	55719	NM_001136123	RefSeq	Homo sapiens family with sequence similarity 178, member A (FAM178A), transcript variant 2, mRNA.	NM_001136123	Q8IX21	NM_001136123	Hs.447458	adrenal gland| blood| bone| bone marrow| brain| connective tissue| ear| embryonic tissue| esophagus| eye| heart| intestine| kidney| larynx| liver| lung| lymph node| mammary gland| muscle| ovary| pancreas| pituitary gland| placenta| prostate| skin| spleen| stomach| testis| thymus| thyroid| tonsil| trachea| uterus| vascular| breast (mammary gland) tumor| chondrosarcoma| colorectal tumor| esophageal…					NM_001136123	GO:0000785	chromatin	inferred from direct assay												4.73426	4.7257	4.64836	4.50885
TC06003406.hg.1	2.2494	1.69705	1.46648	up	0.000255209	0.0558044	BTNL2	AY684333	butyrophilin-like 2 (MHC class II associated)	protein_coding	chr6	-	AY684333	3843221	3845314	30	6p21.3	56244	AY684333	NONCODE	accn=AY684333 class=mRNAlike lncRNA name=NULL ref=H-invitational v7.5 transcriptId=HIT000257116_06 cpcScore=-1.3144600 cnci=-0.3891835	AY684333	Q9UIR0	AY684333	Hs.534471						AY684333	GO:0016021	integral component of membrane	inferred from electronic annotation												2.40417	1.90665	2.34758	2.3392
TC02001088.hg.1	5.27673	4.62293	1.5733	up	0.000257256	0.0558044	RNA5SP113	ENST00000410486	RNA, 5S ribosomal pseudogene 113	rRNA	chr2	+	ENST00000410486	182913549	182913632	30			ENST00000410486	ENSEMBL	ncrna:known chromosome:GRCh38:2:182048822:182048905:1 gene:ENSG00000222418 gene_biotype:rRNA transcript_biotype:rRNA																									5.07807	5.33681	5.23932	5.45272
TC03001011.hg.1	4.26486	3.74706	1.43177	up	0.000259071	0.0558044	snoU13.421	ENST00000459417		other	chr3	+		185160007	185160107	30			ENST00000459417	ENSEMBL	[retired]ncrna:snoRNA chromosome:GRCh37:3:185160007:185160107:1 gene:ENSG00000239146 gene_biotype:snoRNA transcript_biotype:snoRNA																									4.14226	4.37165	4.25289	4.29264
TC09002359.hg.1	2.53773	2.04458	1.40752	up	0.000260051	0.0558044	linc-C9orf169	TCONS_00016732-XLOC_007620		ncRNA	chr9	+		140119094	140119403	30			TCONS_00016732-XLOC_007620	Rinn lincRNA	linc-C9orf169 chr9:+:140119093-140119403																									2.44625	2.545	2.45249	2.7072
TC22001347.hg.1	4.39148	4.07392	1.24622	up	0.000261047	0.0558044	CBY1	BC036921	chibby homolog 1 (Drosophila)	protein_coding	chr22	-	BC036921	39066473	39077825	30	22q12	25776	BC036921	NONCODE	accn=BC036921 class=mRNAlike lncRNA name=Human lncRNA ref=JounralRNA transcriptId=467 cpcScore=-0.9201540 cnci=-0.2421096	BC036921	Q9Y3M2	BC036921	Hs.334911	adipose tissue| adrenal gland| ascites| blood| bone| bone marrow| brain| cervix| connective tissue| embryonic tissue| esophagus| eye| heart| intestine| kidney| liver| lung| mammary gland| mouth| muscle| ovary| pancreas| parathyroid| pharynx| placenta| prostate| salivary gland| skin| stomach| testis| thyroid| uterus|adrenal tumor| bladder carcinoma| breast (mammary gland) tumor| chondrosarcoma| co…	BC036921	GO:0008104	protein localization	inferred from mutant phenotype	BC036921	GO:0005634	nucleus	inferred from direct assay	BC036921	GO:0005515	protein binding	inferred from physical interaction								4.41661	4.36558	4.36211	4.42162
TC20000230.hg.1	1.58337	1.14766	1.35258	up	0.000261108	0.0558044	BPIFB9P	ENST00000420264	BPI fold containing family B, member 9, pseudogene	pseudogene	chr20	+	ENST00000420264	31938669	31941866	30			ENST00000420264	ENSEMBL	havana:known chromosome:GRCh38:20:33350863:33354060:1 gene:ENSG00000125997 gene_biotype:transcribed_unprocessed_pseudogene transcript_biotype:processed_transcript			ENST00000420264	Hs.528157	eye| normal																				1.62871	1.49739	1.56536	1.64203
TC01005077.hg.1	4.10905	4.80254	-1.6172	down	0.000261139	0.0558044	ZNF678	NR_033184	zinc finger protein 678	protein_coding	chr1	+	NR_033184	227751220	227850164	40	1q42.13	339500	NR_033184	NONCODE	accn=NR_033184 class=lncRNA name= ref=RefGeneNoncode transcriptId=NR_033184 cpcScore=7.3589100 cnci=-0.3624069	NR_033184	Q5SXM1	NR_033184	Hs.30323	brain| cervix| embryonic tissue| eye| heart| intestine| kidney| liver| lung| lymph node| mammary gland| muscle| ovary| placenta| prostate| spleen| testis| thyroid| uterus| vascular| breast (mammary gland) tumor| cervical tumor| colorectal tumor| germ cell tumor| glioma| head and neck tumor| liver tumor| normal| ovarian tumor| primitive neuroectodermal tumor of the CNS| prostate cancer| retinoblas…	NR_033184	GO:0006351	transcription, DNA-templated	inferred from electronic annotation	NR_033184	GO:0005634	nucleus	inferred from electronic annotation	NR_033184	GO:0003677	DNA binding	inferred from electronic annotation								4.06372	4.26503	4.09861	4.00883
TC07001902.hg.1	5.80412	5.1955	1.5248	up	0.000261858	0.0558044	DQ587956	DQ587956	Homo sapiens piRNA piR-55068, complete sequence.	other	chr7	-		138127399	138127428	6			DQ587956	GenBank	Homo sapiens piRNA piR-55068, complete sequence.																									5.8966	5.76077	5.70544	5.85366
TC21000237.hg.1	5.80542	5.38319	1.34	up	0.000262185	0.0558044	KRTAP10-12	NM_198699	keratin associated protein 10-12	protein_coding	chr21	+	NM_198699	46117087	46117959	80	21q22.3	386685	NM_198699	RefSeq	Homo sapiens keratin associated protein 10-12 (KRTAP10-12), mRNA.	NM_198699	P60413	NM_198699	Hs.297526	eye| ovary| normal| ovarian tumor					NM_198699	GO:0045095	keratin filament	inferred from electronic annotation												5.75773	5.71398	5.96366	5.78629
TC07002270.hg.1	4.97112	4.61748	1.27778	up	0.000264366	0.0558044	ENST00000507268	ENST00000507268		ncRNA	chr7	+		39893117	39894854	30			ENST00000507268	NONCODE	accn=NULL class=lncRNA name= ref=EnsemblNoncode transcriptId=ENST00000507268 cpcScore=-0.9682420 cnci=-0.3495086																									4.91797	4.95003	4.99728	5.01919
TC17002282.hg.1	2.2717	1.72508	1.46065	up	0.000264848	0.0558044	linc-KIF2B-1	TCONS_00025434-XLOC_012253		ncRNA	chr17	+		50995288	51004254	30			TCONS_00025434-XLOC_012253	Rinn lincRNA	linc-KIF2B-1 chr17:+:50995287-51004254																									2.06842	2.58976	2.17799	2.25063
TC18000596.hg.1	2.94029	2.53342	1.32581	up	0.000264924	0.0558044	linc-USP14-1	TCONS_00026225-XLOC_012600		ncRNA	chr18	+		137413	141924	30			TCONS_00026225-XLOC_012600	Rinn lincRNA	linc-USP14-1 chr18:+:137412-141924																									2.93956	2.91577	3.12039	2.78543
TC12001564.hg.1	3.756	3.12474	1.54892	up	0.000265697	0.0558044	RP11-834C11.10	ENST00000551732		ncRNA	chr12	-		54555849	54558236	26			ENST00000551732	ENSEMBL	havana:known chromosome:GRCh38:12:54162065:54164452:-1 gene:ENSG00000257534 gene_biotype:lincRNA transcript_biotype:lincRNA																									3.62847	3.51319	4.01978	3.86257
TC05002137.hg.1	5.02784	4.60965	1.33625	up	0.00026587	0.0558044	CBY3	NM_001164444	chibby homolog 3 (Drosophila)	protein_coding	chr5	-	NM_001164444	179105559	179107975	22	5q35.3	646019	NM_001164444	RefSeq	Homo sapiens chibby homolog 3 (Drosophila) (CBY3), mRNA.	NM_001164444	A6NI87	NM_001164444	Hs.535767	brain| testis| vascular| germ cell tumor| glioma| normal| fetus| adult																				4.96303	5.09893	4.88121	5.16819
TC19001783.hg.1	3.44363	2.89671	1.46097	up	0.00026591	0.0558044	FLJ30403	NR_034159	uncharacterized LOC729975	other	chr19	-	NR_034159	52095036	52097633	30	19q13.41	729975	NR_034159	RefSeq	Homo sapiens uncharacterized LOC729975 (FLJ30403), long non-coding RNA.	NR_034159	Q96NP5	NR_034159	Hs.716785	brain| muscle| pancreas| germ cell tumor| normal| adult	NR_034159	GO:0005975	carbohydrate metabolic process	inferred from electronic annotation					NR_034159	GO:0016757	transferase activity, transferring glycosyl groups	inferred from electronic annotation								3.40859	3.493	3.38632	3.48662
TC0X001723.hg.1	4.72799	5.72263	-1.99258	down	0.000267278	0.0558044	KLF8	AK054627	Kruppel-like factor 8	protein_coding	chrX	+	AK054627	56312985	56315265	30	Xp11.21	11279	AK054627	NONCODE	accn=AK054627 class=mRNAlike lncRNA name=Human lncRNA ref=JounralRNA transcriptId=104 cpcScore=-1.2161500 cnci=-0.3938545	AK054627	O95600	AK054627	Hs.646614	adrenal gland| bone| brain| connective tissue| embryonic tissue| esophagus| eye| heart| kidney| larynx| lung| lymph node| mammary gland| mouth| muscle| nerve| pancreas| pharynx| placenta| prostate| skin| testis| thymus| trachea| uterus| vascular| chondrosarcoma| germ cell tumor| head and neck tumor| kidney tumor| leukemia| lymphoma| normal| uterine tumor|embryoid body| blastocyst| fetus| adult	AK054627	GO:0006351	transcription, DNA-templated	inferred from electronic annotation	AK054627	GO:0005634	nucleus	inferred from electronic annotation	AK054627	GO:0003677	DNA binding	inferred from electronic annotation								4.66266	5.0136	4.74546	4.49024
TC04000324.hg.1	5.139	5.54932	-1.32898	down	0.000268152	0.0558044	EXOC1	NM_001024924	exocyst complex component 1	protein_coding	chr4	+	NM_001024924	56719782	56771244	332	4q12	55763	NM_001024924	RefSeq	Homo sapiens exocyst complex component 1 (EXOC1), transcript variant 3, mRNA.	NM_001024924	Q9NV70	NM_001024924	Hs.269665	adrenal gland| ascites| bladder| blood| bone| bone marrow| brain| cervix| connective tissue| ear| embryonic tissue| esophagus| eye| heart| intestine| kidney| larynx| liver| lung| lymph| lymph node| mammary gland| mouth| muscle| nerve| ovary| pancreas| pharynx| placenta| prostate| skin| spleen| stomach| testis| thymus| thyroid| trachea| uterus| vascular|adrenal tumor| bladder carcinoma| breast (ma…	NM_001024924	GO:0006887	exocytosis	non-traceable author statement	NM_001024924	GO:0000145	exocyst	non-traceable author statement	NM_001024924	GO:0005515	protein binding	inferred from physical interaction				ENST00000346134	Pfam	IPR019160	Exocyst complex, component 1/SEC3	5.18991	5.2488	5.02767	5.08963
TC05001437.hg.1	4.35063	4.67738	-1.25419	down	0.000268356	0.0558044	CCDC125	NM_176816	coiled-coil domain containing 125	protein_coding	chr5	-	NM_176816	68576002	68628636	245	5q13.2	202243	NM_176816	RefSeq	Homo sapiens coiled-coil domain containing 125 (CCDC125), mRNA.	NM_176816	Q86Z20	NM_176816	Hs.654850	adipose tissue| ascites| blood| brain| connective tissue| eye| kidney| liver| lung| lymph node| mammary gland| pharynx| placenta| prostate| skin| stomach| testis| thyroid| trachea| uterus| breast (mammary gland) tumor| gastrointestinal tumor| germ cell tumor| head and neck tumor| leukemia| lung tumor| non-neoplasia| normal| prostate cancer| retinoblastoma| skin tumor| soft tissue/muscle tissue tu…					NM_176816	GO:0005737	cytoplasm	inferred from electronic annotation												4.45536	4.31917	4.31231	4.31568
TC17001840.hg.1	4.32342	3.98939	1.26053	up	0.00026936	0.0558044	LINC00673	NR_036488	long intergenic non-protein coding RNA 673	ncRNA	chr17	-	NR_036488	70380443	70588943	70		100499467	NR_036488	RefSeq	Homo sapiens long intergenic non-protein coding RNA 673 (LINC00673), long non-coding RNA.			NR_036488	Hs.157726	ascites| bone| brain| connective tissue| embryonic tissue| esophagus| eye| intestine| larynx| liver| lung| mammary gland| mouth| ovary| pancreas| placenta| skin| stomach| testis| trachea| uterus| breast (mammary gland) tumor| chondrosarcoma| colorectal tumor| esophageal tumor| gastrointestinal tumor| germ cell tumor| glioma| head and neck tumor| leukemia| liver tumor| non-neoplasia| normal| ovari…																				4.20977	4.31778	4.36134	4.4048
TC17002257.hg.1	4.68235	4.21972	1.37806	up	0.000270945	0.0558044	uc002inz.1	uc002inz.1		ncRNA	chr17	+		46800542	46802119	30			uc002inz.1	NONCODE	accn=NULL class=lncRNA name= ref=UCSCGeneNoncode transcriptId=uc002inz.1 cpcScore=-0.9442540 cnci=-0.1579843																									4.57088	4.79543	4.72375	4.63934
TC07000052.hg.1	4.14948	3.54679	1.51855	up	0.000271836	0.0558044	AC092171.4	OTTHUMT00000324095	novel transcript	ncRNA	chr7	+	OTTHUMT00000324095	5515435	5519442	30			OTTHUMT00000324095	Havana transcript	cdna:all chromosome:VEGA56:7:5475804:5479811:1 Gene:OTTHUMG00000151833																									3.98274	4.20354	4.35303	4.05864
TC08000663.hg.1	5.04964	5.51046	-1.37632	down	0.000273501	0.0558044	EMC2	NM_014673	ER membrane protein complex subunit 2	protein_coding	chr8	+	NM_014673	109455830	109499145	180	8q23.1	9694	NM_014673	RefSeq	Homo sapiens ER membrane protein complex subunit 2 (EMC2), mRNA.	NM_014673	Q15006	NM_014673	Hs.654351	adipose tissue| adrenal gland| ascites| bladder| blood| bone| bone marrow| brain| connective tissue| ear| embryonic tissue| eye| heart| intestine| kidney| liver| lung| lymph node| mammary gland| mouth| muscle| nerve| ovary| pancreas| parathyroid| pituitary gland| placenta| prostate| salivary gland| skin| stomach| testis| thymus| thyroid| umbilical cord| uterus| vascular| bladder carcinoma| breast…					NM_014673	GO:0005634	nucleus	inferred from electronic annotation	ENST00000220853	GO:0005515	protein binding	inferred from electronic annotation								5.09945	5.13441	4.86707	5.09764
TC07002486.hg.1	4.0717	3.75982	1.24133	up	0.000273519	0.0558044	linc-ZKSCAN1-1	TCONS_00013553-XLOC_006188		ncRNA	chr7	+		99594667	99609249	90			TCONS_00013553-XLOC_006188	Rinn lincRNA	linc-ZKSCAN1-1 chr7:+:99594666-99609239																									4.04876	4.07195	4.051	4.11511
TC10000551.hg.1	6.68339	5.68418	1.99891	up	0.000273687	0.0558044	DQ584676	DQ584676	Homo sapiens piRNA piR-51788, complete sequence.	other	chr10	+		79541183	79541208	2			DQ584676	GenBank	Homo sapiens piRNA piR-51788, complete sequence.																									6.85603	6.57939	6.46921	6.82894
TC02000980.hg.1	2.45568	2.02415	1.34866	up	0.000275596	0.0558044	LOC101929570	BC042876	uncharacterized LOC101929570	ncRNA	chr2	+	BC042876	163625446	163654482	50	2q24.2	101929570	BC042876	GenBank	Homo sapiens cDNA clone IMAGE:4830853.			BC042876	Hs.470445	testis| vascular| normal| fetus																				2.39746	2.38557	2.49906	2.54063
TC11000667.hg.1	4.90221	4.50777	1.31443	up	0.000275752	0.0558044	NPAS4	NM_178864	neuronal PAS domain protein 4	protein_coding	chr11	+	NM_178864	66188475	66194178	100	11q13	266743	NM_178864	RefSeq	Homo sapiens neuronal PAS domain protein 4 (NPAS4), mRNA.	NM_178864	Q8IUM7	NM_178864	Hs.256036	blood| brain| lung| uterus| germ cell tumor| leukemia| normal| juvenile| adult	NM_178864	GO:0006351	transcription, DNA-templated	inferred from electronic annotation	NM_178864	GO:0005634	nucleus	inferred from electronic annotation	NM_178864	GO:0003677	DNA binding	inferred from electronic annotation				ENST00000311034	Pfam	IPR013655	PAS fold-3	4.82635	4.80025	4.99272	4.98953
TC12001752.hg.1	6.13025	6.74234	-1.52847	down	0.000276301	0.0558044	NAP1L1	NM_004537	nucleosome assembly protein 1-like 1	protein_coding	chr12	-	NM_004537	76438670	76478813	354	12q21.2	4673	NM_004537	RefSeq	Homo sapiens nucleosome assembly protein 1-like 1 (NAP1L1), transcript variant 2, mRNA.	NM_004537	P55209	NM_004537	Hs.524599	adipose tissue| adrenal gland| ascites| bladder| blood| bone| bone marrow| brain| cervix| connective tissue| ear| embryonic tissue| esophagus| eye| heart| intestine| kidney| larynx| liver| lung| lymph| lymph node| mammary gland| mouth| muscle| nerve| ovary| pancreas| parathyroid| pharynx| pituitary gland| placenta| prostate| salivary gland| skin| spleen| stomach| testis| thymus| thyroid| tonsil| …	NM_004537	GO:0006260	DNA replication	traceable author statement	NM_004537	GO:0005634	nucleus	inferred from electronic annotation	NM_004537	GO:0005515	protein binding	inferred from physical interaction				ENST00000261182	Pfam	IPR002164	Nucleosome assembly protein (NAP)	6.06616	6.19932	6.10684	6.14868
TC14002087.hg.1	4.62085	4.13544	1.39999	up	0.000278103	0.0558044	SYNDIG1L	AK094873	synapse differentiation inducing 1-like	protein_coding	chr14	-	AK094873	74872603	74874510	30	14q24.3	646658	AK094873	NONCODE	accn=AK094873 class=mRNAlike lncRNA name=Human lncRNA ref=JounralRNA transcriptId=798 cpcScore=-0.8086450 cnci=-0.1961390	AK094873	A6NDD5	AK094873	Hs.12400	brain| connective tissue| eye| kidney| lung| nerve| pancreas| chondrosarcoma| glioma| kidney tumor| normal| pancreatic tumor| juvenile| adult	AK094873	GO:0009607	response to biotic stimulus	inferred from electronic annotation	AK094873	GO:0005794	Golgi apparatus	inferred from electronic annotation												4.4417	4.49057	4.71992	4.83121
TC01000200.hg.1	4.77053	4.12858	1.56044	up	0.000280375	0.0558044	C1orf64	NM_178840	chromosome 1 open reading frame 64	protein_coding	chr1	+	NM_178840	16330731	16335302	30	1p36.13	149563	NM_178840	RefSeq	Homo sapiens chromosome 1 open reading frame 64 (C1orf64), mRNA.	NM_178840	Q8NEQ6	NM_178840	Hs.29190	bone| brain| connective tissue| heart| kidney| mammary gland| pituitary gland| prostate| breast (mammary gland) tumor| chondrosarcoma| germ cell tumor| glioma| normal| soft tissue/muscle tissue tumor| fetus| adult																				4.86242	4.68679	4.67804	4.85487
TC19002156.hg.1	5.73794	6.44985	-1.63798	down	0.000281355	0.0558044	ZNF226	AF024707	zinc finger protein 226	protein_coding	chr19	+	AF024707	44635344	44680495	30	19q13.2	7769	AF024707	NONCODE	accn=AF024707 class=mRNAlike lncRNA name=Human lncRNA ref=JounralRNA transcriptId=1116 cpcScore=-0.6470520 cnci=-0.1109370	AF024707	Q9NYT6	AF024707	Hs.145956	adrenal gland| bladder| blood| brain| connective tissue| embryonic tissue| esophagus| eye| heart| intestine| kidney| liver| lung| lymph node| mammary gland| mouth| muscle| pancreas| pharynx| pituitary gland| placenta| prostate| skin| spleen| stomach| testis| thymus| thyroid| trachea| uterus| vascular|adrenal tumor| bladder carcinoma| breast (mammary gland) tumor| colorectal tumor| esophageal tumo…	AF024707	GO:0006351	transcription, DNA-templated	inferred from electronic annotation	AF024707	GO:0005634	nucleus	inferred from electronic annotation	AF024707	GO:0003677	DNA binding	inferred from electronic annotation								5.81942	5.70773	5.62226	5.80234
TC07002015.hg.1	3.72328	3.2308	1.40686	up	0.000282354	0.0558044	AC005586	AC005586		ncRNA	chr7	-		150004701	150010334	30			AC005586	NONCODE	accn=AC005586 class=Y RNA name=hY4 ref=NONCODE v2.0 transcriptId=NULL cpcScore=-1.1810100 cnci=-1.0000000	AC005586	Q9BV99				AC005586	GO:0001523	retinoid metabolic process	inferred from direct assay	AC005586	GO:0005576	extracellular region	inferred from electronic annotation	AC005586	GO:0005102	receptor binding	inferred from physical interaction								3.74281	3.86581	3.59153	3.69297
TC06001484.hg.1	3.79388	3.09702	1.62098	up	0.000283708	0.0558044	MAS1L	NM_052967	MAS1 proto-oncogene like, G protein-coupled receptor	protein_coding	chr6	-	NM_052967	29454474	29455738	25	6p22.1	116511	NM_052967	RefSeq	Homo sapiens MAS1 proto-oncogene like, G protein-coupled receptor (MAS1L), mRNA.	NM_052967	P35410	NM_052967	Hs.533297		NM_052967	GO:0007186	G-protein coupled receptor signaling pathway	non-traceable author statement	NM_052967	GO:0005634	nucleus	inferred from direct assay	NM_052967	GO:0004930	G-protein coupled receptor activity	non-traceable author statement				ENST00000377127	Pfam	IPR000276	G protein-coupled receptor, rhodopsin-like	3.65072	4.11112	3.63964	3.77405
TC6_apd_hap1000059.hg.1	3.79388	3.09702	1.62098	up	0.000283708	0.0558044	MAS1L	NM_052967	MAS1 proto-oncogene like, G protein-coupled receptor	protein_coding	chr6_apd_hap1	-	NM_052967	757952	759212	25	6p22.1	116511	NM_052967	RefSeq	Homo sapiens MAS1 proto-oncogene like, G protein-coupled receptor (MAS1L), mRNA.	NM_052967	P35410	NM_052967	Hs.533297		NM_052967	GO:0007186	G-protein coupled receptor signaling pathway	non-traceable author statement	NM_052967	GO:0005634	nucleus	inferred from direct assay	NM_052967	GO:0004930	G-protein coupled receptor activity	non-traceable author statement				OTTHUMT00000309106	Pfam	IPR000276	G protein-coupled receptor, rhodopsin-like	3.65072	4.11112	3.63964	3.77405
TC6_cox_hap2000121.hg.1	3.79388	3.09702	1.62098	up	0.000283708	0.0558044	MAS1L	NM_052967	MAS1 proto-oncogene like, G protein-coupled receptor	protein_coding	chr6_cox_hap2	-	NM_052967	973255	974515	25	6p22.1	116511	NM_052967	RefSeq	Homo sapiens MAS1 proto-oncogene like, G protein-coupled receptor (MAS1L), mRNA.	NM_052967	P35410	NM_052967	Hs.533297		NM_052967	GO:0007186	G-protein coupled receptor signaling pathway	non-traceable author statement	NM_052967	GO:0005634	nucleus	inferred from direct assay	NM_052967	GO:0004930	G-protein coupled receptor activity	non-traceable author statement				OTTHUMT00000076753	Pfam	IPR000276	G protein-coupled receptor, rhodopsin-like	3.65072	4.11112	3.63964	3.77405
TC6_dbb_hap3000110.hg.1	3.79388	3.09702	1.62098	up	0.000283708	0.0558044	MAS1L	NM_052967	MAS1 proto-oncogene like, G protein-coupled receptor	protein_coding	chr6_dbb_hap3	-	NM_052967	757805	759065	25	6p22.1	116511	NM_052967	RefSeq	Homo sapiens MAS1 proto-oncogene like, G protein-coupled receptor (MAS1L), mRNA.	NM_052967	P35410	NM_052967	Hs.533297		NM_052967	GO:0007186	G-protein coupled receptor signaling pathway	non-traceable author statement	NM_052967	GO:0005634	nucleus	inferred from direct assay	NM_052967	GO:0004930	G-protein coupled receptor activity	non-traceable author statement				OTTHUMT00000309678	Pfam	IPR000276	G protein-coupled receptor, rhodopsin-like	3.65072	4.11112	3.63964	3.77405
TC6_mann_hap4000099.hg.1	3.79388	3.09702	1.62098	up	0.000283708	0.0558044	MAS1L	NM_052967	MAS1 proto-oncogene like, G protein-coupled receptor	protein_coding	chr6_mann_hap4	-	NM_052967	757442	758702	25	6p22.1	116511	NM_052967	RefSeq	Homo sapiens MAS1 proto-oncogene like, G protein-coupled receptor (MAS1L), mRNA.	NM_052967	P35410	NM_052967	Hs.533297		NM_052967	GO:0007186	G-protein coupled receptor signaling pathway	non-traceable author statement	NM_052967	GO:0005634	nucleus	inferred from direct assay	NM_052967	GO:0004930	G-protein coupled receptor activity	non-traceable author statement				OTTHUMT00000310818	Pfam	IPR000276	G protein-coupled receptor, rhodopsin-like	3.65072	4.11112	3.63964	3.77405
TC6_mcf_hap5000103.hg.1	3.79388	3.09702	1.62098	up	0.000283708	0.0558044	MAS1L	NM_052967	MAS1 proto-oncogene like, G protein-coupled receptor	protein_coding	chr6_mcf_hap5	-	NM_052967	757656	758916	25	6p22.1	116511	NM_052967	RefSeq	Homo sapiens MAS1 proto-oncogene like, G protein-coupled receptor (MAS1L), mRNA.	NM_052967	P35410	NM_052967	Hs.533297		NM_052967	GO:0007186	G-protein coupled receptor signaling pathway	non-traceable author statement	NM_052967	GO:0005634	nucleus	inferred from direct assay	NM_052967	GO:0004930	G-protein coupled receptor activity	non-traceable author statement				OTTHUMT00000311764	Pfam	IPR000276	G protein-coupled receptor, rhodopsin-like	3.65072	4.11112	3.63964	3.77405
TC6_qbl_hap6000111.hg.1	3.79388	3.09702	1.62098	up	0.000283708	0.0558044	MAS1L	NM_052967	MAS1 proto-oncogene like, G protein-coupled receptor	protein_coding	chr6_qbl_hap6	-	NM_052967	757759	759019	25	6p22.1	116511	NM_052967	RefSeq	Homo sapiens MAS1 proto-oncogene like, G protein-coupled receptor (MAS1L), mRNA.	NM_052967	P35410	NM_052967	Hs.533297		NM_052967	GO:0007186	G-protein coupled receptor signaling pathway	non-traceable author statement	NM_052967	GO:0005634	nucleus	inferred from direct assay	NM_052967	GO:0004930	G-protein coupled receptor activity	non-traceable author statement				OTTHUMT00000035448	Pfam	IPR000276	G protein-coupled receptor, rhodopsin-like	3.65072	4.11112	3.63964	3.77405
TC6_ssto_hap7000103.hg.1	3.79388	3.09702	1.62098	up	0.000283708	0.0558044	MAS1L	NM_052967	MAS1 proto-oncogene like, G protein-coupled receptor	protein_coding	chr6_ssto_hap7	-	NM_052967	795006	796266	25	6p22.1	116511	NM_052967	RefSeq	Homo sapiens MAS1 proto-oncogene like, G protein-coupled receptor (MAS1L), mRNA.	NM_052967	P35410	NM_052967	Hs.533297		NM_052967	GO:0007186	G-protein coupled receptor signaling pathway	non-traceable author statement	NM_052967	GO:0005634	nucleus	inferred from direct assay	NM_052967	GO:0004930	G-protein coupled receptor activity	non-traceable author statement				OTTHUMT00000251108	Pfam	IPR000276	G protein-coupled receptor, rhodopsin-like	3.65072	4.11112	3.63964	3.77405
TC08000140.hg.1	2.1735	1.70287	1.38572	up	0.000285556	0.0558044	NSAP11	ENST00000524252	nervous system abundant protein 11	unknown	chr8	+	ENST00000524252	18578415	18591915	30	8p22	100131275	ENST00000524252	ENSEMBL	havana:known chromosome:GRCh38:8:18720905:18734405:1 gene:ENSG00000187229 gene_biotype:antisense transcript_biotype:antisense	ENST00000524252	Q86YR2	ENST00000524252	Hs.623961	mammary gland| thyroid| head and neck tumor| normal| adult																				2.38189	2.20429	2.02649	2.08133
TC02004067.hg.1	4.8096	4.45011	1.28298	up	0.000288842	0.0558044	MYCNOS	ENST00000419083	MYCN opposite strand	antisense	chr2	-	ENST00000419083	16060895	16082371	130	2p24.1	10408	ENST00000419083	NONCODE	accn=NULL class=lncRNA name= ref=EnsemblNoncode transcriptId=ENST00000419083 cpcScore=2.4428300 cnci=-0.2069087 gene:ENSG00000233718	ENST00000419083	P40205	ENST00000419083	Hs.651453	brain| kidney| liver| lung| testis| germ cell tumor| glioma| lung tumor| normal| fetus	ENST00000419083	GO:0007275	multicellular organismal development	traceable author statement																4.81218	4.81081	4.78956	4.82585
TC12000817.hg.1	6.43803	7.28985	-1.80478	down	0.000291854	0.0558044	KIAA1033	NM_015275	KIAA1033	protein_coding	chr12	+	NM_015275	105501492	105562912	360	12q24.11	23325	NM_015275	RefSeq	Homo sapiens KIAA1033 (KIAA1033), transcript variant 2, mRNA.	NM_015275	Q2M389	NM_015275	Hs.12144	blood| bone| bone marrow| brain| cervix| connective tissue| ear| embryonic tissue| eye| heart| intestine| kidney| liver| lung| lymph node| mammary gland| mouth| muscle| ovary| pancreas| parathyroid| placenta| prostate| skin| spleen| stomach| testis| thymus| trachea| uterus| vascular| bladder carcinoma| cervical tumor| chondrosarcoma| colorectal tumor| gastrointestinal tumor| germ cell tumor| glio…	NM_015275	GO:0016197	endosomal transport	inferred from mutant phenotype	NM_015275	GO:0005768	endosome	inferred from direct assay												6.50571	6.38407	6.58541	6.27692
TC01002217.hg.1	3.85646	3.38106	1.3903	up	0.000292664	0.0558044	PRAMEF10	NM_001039361	PRAME family member 10	protein_coding	chr1	-	NM_001039361	12952727	12958101	40	1p36.21	343071	NM_001039361	RefSeq	Homo sapiens PRAME family member 10 (PRAMEF10), mRNA.	NM_001039361	O60809	NM_001039361	Hs.684629		NM_001039361	GO:0008284	positive regulation of cell proliferation	inferred from electronic annotation					NM_001039361	GO:0042974	retinoic acid receptor binding	inferred from electronic annotation								3.86242	3.93541	3.92814	3.69987
TC14002182.hg.1	6.48644	6.0679	1.33657	up	0.000293782	0.0558044	CEP170B	BC127882	centrosomal protein 170B	protein_coding	chr14	-	BC127882	105349755	105350502	30	14q32.33	283638	BC127882	NONCODE	accn=BC127882 class=mRNAlike lncRNA name=NULL ref=H-invitational v7.5 transcriptId=HIT000389501 cpcScore=-1.0907200 cnci=-0.0889173	BC127882	Q9Y4F5	BC127882	Hs.533721	ascites| blood| bone| brain| cervix| embryonic tissue| esophagus| eye| intestine| kidney| liver| lung| mammary gland| mouth| muscle| nerve| pancreas| placenta| prostate| skin| stomach| testis| thymus| thyroid| uterus| vascular| breast (mammary gland) tumor| cervical tumor| chondrosarcoma| colorectal tumor| esophageal tumor| gastrointestinal tumor| germ cell tumor| glioma| head and neck tumor| kid…					BC127882	GO:0005737	cytoplasm	inferred from electronic annotation												6.39334	6.4853	6.53308	6.53403
TC6_cox_hap2000149.hg.1	5.52154	4.93595	1.50066	up	0.000293841	0.0558044	C6orf15	NM_014070	chromosome 6 open reading frame 15	protein_coding	chr6_cox_hap2	-	NM_014070	2593704	2595040	27	6p21.3	29113	NM_014070	RefSeq	Homo sapiens chromosome 6 open reading frame 15 (C6orf15), mRNA.	NM_014070	Q6UXA7	NM_014070	Hs.272214		NM_014070	GO:0030198	extracellular matrix organization	inferred from electronic annotation	NM_014070	GO:0005614	interstitial matrix	inferred from electronic annotation	NM_014070	GO:0001968	fibronectin binding	inferred from electronic annotation								5.31284	5.52807	5.53264	5.71261
TC06002227.hg.1	2.30279	3.01412	-1.63731	down	0.00029609	0.0558044	AL133260.1	ENST00000408542		miRNA	chr6	-		151361052	151361107	28			ENST00000408542	ENSEMBL	ncrna:novel chromosome:GRCh38:6:151039916:151039971:-1 gene:ENSG00000221469 gene_biotype:miRNA transcript_biotype:miRNA																									2.37364	2.38663	2.16655	2.28434
TC04000505.hg.1	1.66613	1.32621	1.26568	up	0.000296318	0.0558044	RP11-145G20.1	OTTHUMT00000364065	novel transcript	ncRNA	chr4	+	OTTHUMT00000364065	97231852	97740015	58			OTTHUMT00000364065	Havana transcript	cdna:all chromosome:VEGA56:4:96310701:96364452:1 Gene:OTTHUMG00000161181																									1.65389	1.62022	1.67848	1.71193
TC11002992.hg.1	5.48521	5.10271	1.3036	up	0.000297674	0.0558044	KRTAP5-3	AB126072	keratin associated protein 5-3	protein_coding	chr11	-	AB126072	1628795	1629693	30	11p15.5	387266	AB126072	NONCODE	accn=AB126072 class=mRNAlike lncRNA name=Human lncRNA ref=JounralRNA transcriptId=5250 cpcScore=1.5020000 cnci=-0.0376707	AB126072	Q6L8H2	AB126072	Hs.532471						AB126072	GO:0045095	keratin filament	inferred from electronic annotation												5.52237	5.46756	5.53449	5.41642
TC10000537.hg.1	4.41172	3.6769	1.66419	up	0.000297786	0.0558044	DQ586243	DQ586243	Homo sapiens piRNA piR-53355, complete sequence.	other	chr10	+		79540117	79540164	24			DQ586243	GenBank	Homo sapiens piRNA piR-53355, complete sequence.																									4.3595	4.34665	4.49212	4.44859
TC01001294.hg.1	6.29005	5.8548	1.35214	up	0.000297973	0.0558044	MIR92B	NR_030281	microRNA 92b	miRNA	chr1	+	NR_030281	155164968	155165063	30	1q22	693235	NR_030281	RefSeq	Homo sapiens microRNA 92b (MIR92B), microRNA.																									6.21257	6.36661	6.27668	6.30432
TC07000017.hg.1	5.12376	4.70411	1.33761	up	0.000299788	0.0558044	AC091729.8	OTTHUMT00000322851	novel transcript	antisense	chr7	+	OTTHUMT00000322851	1120499	1121814	30			OTTHUMT00000322851	Havana transcript	cdna:all chromosome:VEGA56:7:1080863:1082178:1 Gene:OTTHUMG00000151483																									5.13294	5.04941	5.17148	5.14122
TC05002743.hg.1	5.74797	5.20657	1.45538	up	0.000300398	0.0558044	linc-CPEB4-7	TCONS_00010176-XLOC_004638		ncRNA	chr5	+		172722154	172724670	21			TCONS_00010176-XLOC_004638	Rinn lincRNA	linc-CPEB4-7 chr5:+:172722153-172724670																									5.67988	5.85134	5.63377	5.82689
TC17000266.hg.1	5.55842	4.61236	1.9266	up	0.000300705	0.0558044	DQ593368	DQ593368	Homo sapiens piRNA piR-33480, complete sequence.	other	chr17	+		20448578	20448607	6			DQ593368	GenBank	Homo sapiens piRNA piR-33480, complete sequence.																									5.65103	5.56675	5.82274	5.19315
TC0X000161.hg.1	3.95828	3.63529	1.25092	up	0.000301606	0.0558044	MAGEB16	NM_001099921	melanoma antigen family B, 16	protein_coding	chrX	+	NM_001099921	35816459	35821852	80	Xp21.1	139604	NM_001099921	RefSeq	Homo sapiens melanoma antigen family B, 16 (MAGEB16), mRNA.	NM_001099921	A2A368	NM_001099921	Hs.700562																	ENST00000399985	Pfam	IPR002190	MAGE protein	3.95173	3.9292	4.00599	3.9462
TC17001942.hg.1	7.08479	6.58986	1.40926	up	0.000301765	0.0558044	MIR657	NR_030394	microRNA 657	miRNA	chr17	-	NR_030394	79099076	79099173	30	17q25.3	724027	NR_030394	RefSeq	Homo sapiens microRNA 657 (MIR657), microRNA.																									7.08247	6.8947	7.15078	7.21123
TC02001914.hg.1	4.99318	4.48198	1.42524	up	0.000302022	0.0558044	AC114752.3	OTTHUMT00000327291	novel transcript	ncRNA	chr2	-	OTTHUMT00000327291	64565201	64568781	30			OTTHUMT00000327291	Havana transcript	cdna:all chromosome:VEGA56:2:64338067:64341647:-1 Gene:OTTHUMG00000152672																									5.0571	4.88379	4.9777	5.05413
TC07001185.hg.1	4.268	5.29599	-2.03919	down	0.000302024	0.0558044	RAPGEF5	NM_012294	Rap guanine nucleotide exchange factor (GEF) 5	protein_coding	chr7	-	NM_012294	22157908	22396763	476	7p15.3	9771	NM_012294	RefSeq	Homo sapiens Rap guanine nucleotide exchange factor (GEF) 5 (RAPGEF5), mRNA.	NM_012294	Q92565	NM_012294	Hs.174768	adrenal gland| brain| embryonic tissue| esophagus| intestine| kidney| larynx| liver| lung| lymph node| mammary gland| mouth| parathyroid| pharynx| placenta| skin| stomach| testis| thymus| trachea| uterus| breast (mammary gland) tumor| esophageal tumor| gastrointestinal tumor| germ cell tumor| head and neck tumor| kidney tumor| liver tumor| non-neoplasia| normal| skin tumor| fetus| adult	NM_012294	GO:0007264	small GTPase mediated signal transduction	non-traceable author statement	NM_012294	GO:0005634	nucleus	inferred from direct assay	NM_012294	GO:0005088	Ras guanyl-nucleotide exchange factor activity	traceable author statement				ENST00000344041	Pfam	IPR000651	Ras-like guanine nucleotide exchange factor, N-terminal	4.1103	4.43697	4.43204	4.09268
TC18000867.hg.1	3.92358	3.53825	1.30616	up	0.000303433	0.0558044	CABLES1	BC019322	Cdk5 and Abl enzyme substrate 1	protein_coding	chr18	-	BC019322	20769094	20771065	30	18q11.2	91768	BC019322	NONCODE	accn=BC019322 class=mRNAlike lncRNA name=Human lncRNA ref=JounralRNA transcriptId=2256 cpcScore=-0.5447930 cnci=-0.1603805	BC019322	Q8TDN4	BC019322	Hs.11108	adrenal gland| ascites| bladder| brain| cervix| connective tissue| embryonic tissue| eye| heart| intestine| kidney| larynx| liver| lung| mammary gland| nerve| ovary| pancreas| parathyroid| pharynx| placenta| prostate| skin| stomach| testis| thymus| thyroid| umbilical cord| uterus| vascular|adrenal tumor| breast (mammary gland) tumor| cervical tumor| chondrosarcoma| colorectal tumor| gastrointesti…	BC019322	GO:0007049	cell cycle	inferred from electronic annotation	BC019322	GO:0005634	nucleus	inferred from electronic annotation	BC019322	GO:0005515	protein binding	inferred from physical interaction								3.82339	3.8894	4.07152	3.91
TC02004257.hg.1	5.05334	4.74578	1.23761	up	0.000303832	0.0558044	linc-FANCL-5	TCONS_00004267-XLOC_002109		ncRNA	chr2	-		60666528	60666905	30			TCONS_00004267-XLOC_002109	Rinn lincRNA	linc-FANCL-5 chr2:-:60666527-60666905																									5.04101	5.03435	5.03586	5.10215
TC01003988.hg.1	4.27636	3.78205	1.40864	up	0.000304096	0.0558044	RP11-443B7.3	ENST00000549744		ncRNA	chr1	-		235115394	235116551	30			ENST00000549744	ENSEMBL	havana:known chromosome:GRCh38:1:234979647:234980804:-1 gene:ENSG00000258082 gene_biotype:lincRNA transcript_biotype:lincRNA																									4.37863	4.36996	4.16635	4.19051
TC17002033.hg.1	5.4403	4.97132	1.38413	up	0.000304887	0.0558044	linc-NLGN2	TCONS_00025824-XLOC_012097		ncRNA	chr17	+		7308194	7311462	40			TCONS_00025824-XLOC_012097	Rinn lincRNA	linc-NLGN2 chr17:+:7308193-7311457																									5.32077	5.36134	5.47316	5.60593
TC03000092.hg.1	5.52443	6.16834	-1.56256	down	0.000305215	0.0558044	CAPN7	NM_014296	calpain 7	protein_coding	chr3	+	NM_014296	15247659	15294425	340	3p24	23473	NM_014296	RefSeq	Homo sapiens calpain 7 (CAPN7), mRNA.	NM_014296	Q9Y6W3	NM_014296	Hs.595234	adipose tissue| adrenal gland| bladder| blood| bone| bone marrow| brain| cervix| connective tissue| embryonic tissue| eye| heart| intestine| kidney| larynx| liver| lung| lymph node| mammary gland| mouth| muscle| ovary| pancreas| parathyroid| placenta| prostate| skin| stomach| testis| thymus| thyroid| trachea| uterus| vascular| bladder carcinoma| breast (mammary gland) tumor| cervical tumor| chond…	NM_014296	GO:0010634	positive regulation of epithelial cell migration	inferred from direct assay	NM_014296	GO:0005634	nucleus	inferred from direct assay	NM_014296	GO:0004175	endopeptidase activity	inferred from direct assay	NM_014296	GenMAPP	Integrin-mediated_cell_adhesion_KEGG	ENST00000253693	Pfam	IPR001300	Peptidase C2, calpain, catalytic domain	5.68101	5.62959	5.30412	5.48299
TC04002862.hg.1	2.47807	2.97268	-1.40894	down	0.000307246	0.0558044	linc-AGA-2	TCONS_00009180-XLOC_004195		ncRNA	chr4	-		183795492	183798859	30			TCONS_00009180-XLOC_004195	Rinn lincRNA	linc-AGA-2 chr4:-:183795491-183798859																									2.58752	2.50121	2.62142	2.20213
TC15000300.hg.1	5.86884	5.26749	1.51713	up	0.000307266	0.0558044	CHAC1	NM_001142776	ChaC, cation transport regulator homolog 1 (E. coli)	protein_coding	chr15	+	NM_001142776	41245160	41248717	100	15q15.1	79094	NM_001142776	RefSeq	Homo sapiens ChaC, cation transport regulator homolog 1 (E. coli) (CHAC1), transcript variant 2, mRNA.	NM_001142776	Q9BUX1	NM_001142776	Hs.155569	ascites| blood| brain| cervix| connective tissue| embryonic tissue| eye| intestine| kidney| liver| lung| lymph| mammary gland| muscle| pancreas| prostate| skin| stomach| testis| cervical tumor| colorectal tumor| gastrointestinal tumor| germ cell tumor| leukemia| liver tumor| lung tumor| lymphoma| normal| pancreatic tumor| primitive neuroectodermal tumor of the CNS| prostate cancer| retinoblastoma…	NM_001142776	GO:0006986	response to unfolded protein	inferred from electronic annotation	NM_001142776	GO:0005802	trans-Golgi network	inferred from sequence or structural similarity	NM_001142776	GO:0005112	Notch binding	inferred from sequence or structural similarity				ENST00000444189	Pfam	IPR006840	ChaC-like protein	5.78077	5.71519	5.78582	6.19357
TC22000218.hg.1	4.09601	3.67005	1.34347	up	0.000307732	0.0558044	MIR3200	NR_036171	microRNA 3200	ncRNA	chr22	+	NR_036171	31127544	31127628	30		100422912	NR_036171	RefSeq	Homo sapiens microRNA 3200 (MIR3200), microRNA.																									4.26928	3.94358	4.05128	4.11989
TC10000298.hg.1	3.80179	4.25909	-1.37297	down	0.000309745	0.0558044	FAM35BP	NR_027632	family with sequence similarity 35, member A pseudogene	pseudogene	chr10	+	NR_027632	46897641	46939148	130	10q11.22	414241	NR_027632	RefSeq	Homo sapiens family with sequence similarity 35, member B, pseudogene (FAM35BP), non-coding RNA.	ENST00000497389	Q15382	NR_027632	Hs.594331	adrenal gland| ascites| blood| bone marrow| brain| cervix| connective tissue| ear| embryonic tissue| eye| intestine| kidney| liver| lung| mammary gland| mouth| muscle| ovary| pancreas| placenta| prostate| skin| stomach| thyroid| uterus| vascular|adrenal tumor| breast (mammary gland) tumor| cervical tumor| colorectal tumor| gastrointestinal tumor| germ cell tumor| glioma| head and neck tumor| kidn…	ENST00000497389	GO:0006184	GTP catabolic process	inferred from electronic annotation	ENST00000497389	GO:0005681	spliceosomal complex	inferred from electronic annotation	ENST00000497389	GO:0000166	nucleotide binding	inferred from electronic annotation								3.88417	3.75156	3.72226	3.84915
TC08001059.hg.1	3.83349	3.33579	1.41196	up	0.000309817	0.0558044	RP11-213G6.2	OTTHUMT00000376059	novel transcript	ncRNA	chr8	-	OTTHUMT00000376059	23583844	23600555	30			OTTHUMT00000376059	Havana transcript	cdna:all chromosome:VEGA56:8:23726331:23743042:-1 Gene:OTTHUMG00000163869			ENST00000520375	Hs.583827	testis| normal																				3.80108	4.01389	3.61228	3.90671
TC03000357.hg.1	5.3304	4.78352	1.46092	up	0.000310118	0.0558044	WNT5A-AS1	ENST00000469484	WNT5A antisense RNA 1	antisense	chr3	+	ENST00000469484	55521727	55522336	30			ENST00000469484	ENSEMBL	havana:known chromosome:GRCh38:3:55487699:55488308:1 gene:ENSG00000244586 gene_biotype:antisense transcript_biotype:antisense			ENST00000469484	Hs.581558	eye| normal																				5.22613	5.35974	5.24541	5.49034
TC15001478.hg.1	5.26428	5.93119	-1.58767	down	0.000310637	0.0558044	ZNF280D	NM_001002843	zinc finger protein 280D	protein_coding	chr15	-	NM_001002843	56922374	57210769	470	15q21.3	54816	NM_001002843	RefSeq	Homo sapiens zinc finger protein 280D (ZNF280D), transcript variant 2, mRNA.	NM_001002843	Q6N043	NM_001002843	Hs.511477	adrenal gland| blood| bone| bone marrow| brain| cervix| connective tissue| ear| embryonic tissue| eye| heart| intestine| kidney| larynx| liver| lung| lymph node| mammary gland| mouth| muscle| pancreas| placenta| prostate| salivary gland| skin| stomach| testis| thymus| trachea| uterus| vascular| breast (mammary gland) tumor| cervical tumor| chondrosarcoma| colorectal tumor| gastrointestinal tumor|…	NM_001002843	GO:0006351	transcription, DNA-templated	inferred from electronic annotation	NM_001002843	GO:0005634	nucleus	inferred from electronic annotation	NM_001002843	GO:0003677	DNA binding	inferred from electronic annotation								5.38854	5.29106	5.14335	5.23417
TC10001692.hg.1	4.32111	4.74927	-1.34551	down	0.000310968	0.0558044	FAM204A	NM_001134672	family with sequence similarity 204, member A	protein_coding	chr10	-	NM_001134672	120065401	120101840	275	10q26.11	63877	NM_001134672	RefSeq	Homo sapiens family with sequence similarity 204, member A (FAM204A), transcript variant 2, mRNA.	NM_001134672	Q9H8W3	NM_001134672	Hs.372309	adipose tissue| ascites| bladder| blood| bone| bone marrow| brain| cervix| connective tissue| ear| embryonic tissue| eye| heart| intestine| kidney| liver| lung| lymph node| mammary gland| mouth| muscle| ovary| pancreas| pharynx| placenta| prostate| skin| spleen| stomach| testis| thymus| thyroid| tonsil| trachea| uterus| vascular| bladder carcinoma| breast (mammary gland) tumor| cervical tumor| ch…																				4.29344	4.40296	4.26925	4.31881
TC11001021.hg.1	4.99507	4.5182	1.39173	up	0.000312908	0.0558044	LOC390251	ENST00000393544	SH3-domain GRB2-like 1 pseudogene	pseudogene	chr11	+	ENST00000393544	113659953	113661882	30	11q23.2	390251	ENST00000393544	ENSEMBL	havana:known chromosome:GRCh38:11:113789231:113791160:1 gene:ENSG00000256167 gene_biotype:transcribed_processed_pseudogene transcript_biotype:processed_transcript			ENST00000393544	Hs.636639	connective tissue| embryonic tissue| intestine| liver| stomach| testis| colorectal tumor| gastrointestinal tumor| non-neoplasia| normal|embryoid body| adult																				4.90213	4.9534	5.03556	5.0892
TC12002262.hg.1	4.89969	5.69821	-1.73931	down	0.000316248	0.0558044	ATF7IP	AK125103	activating transcription factor 7 interacting protein	protein_coding	chr12	+	AK125103	14653399	14655865	30	12p13.1	55729	AK125103	NONCODE	accn=AK125103 class=mRNAlike lncRNA name=Human lncRNA ref=JounralRNA transcriptId=4315 cpcScore=-1.3572300 cnci=-0.3568819	AK125103	Q6VMQ6	AK125103	Hs.591151	adipose tissue| adrenal gland| ascites| blood| bone| bone marrow| brain| cervix| connective tissue| embryonic tissue| esophagus| eye| heart| intestine| kidney| larynx| liver| lung| lymph node| mammary gland| mouth| muscle| ovary| pancreas| pharynx| placenta| prostate| skin| spleen| stomach| testis| thymus| thyroid| trachea| uterus|adrenal tumor| breast (mammary gland) tumor| cervical tumor| chond…	AK125103	GO:0000122	negative regulation of transcription from RNA polymerase II promoter	inferred from electronic annotation	AK125103	GO:0005634	nucleus	inferred from direct assay	AK125103	GO:0003714	transcription corepressor activity	inferred from electronic annotation								5.03475	4.97663	4.92367	4.6637
TC01003492.hg.1	2.73074	3.79473	-2.09071	down	0.000317245	0.0558044	AL049798.1	ENST00000408651		miRNA	chr1	-		168717034	168717120	30			ENST00000408651	ENSEMBL	ncrna:novel chromosome:GRCh38:1:168747796:168747882:-1 gene:ENSG00000221578 gene_biotype:miRNA transcript_biotype:miRNA																									3.24601	2.70224	2.51876	2.45594
TC21000493.hg.1	3.30287	2.89967	1.32244	up	0.000317877	0.0558044	LOC101928284	ENST00000437426	uncharacterized LOC101928284	ncRNA	chr21	-	ENST00000437426	44153704	44161868	30		101928284	ENST00000437426	ENSEMBL	havana:known chromosome:GRCh38:21:42733594:42741758:-1 gene:ENSG00000225731 gene_biotype:antisense transcript_biotype:antisense			ENST00000437426	Hs.570405	testis| normal																				3.39061	3.12909	3.38633	3.30547
TC05003009.hg.1	8.63929	9.01798	-1.30016	down	0.000318344	0.0558044	linc_luo_1461	linc_luo_1461		ncRNA	chr5	-		55800417	55800941	40			linc_luo_1461	NONCODE	accn=NULL class=lincRNA name=Human lincRNA ref=Scripture Reconstruction LincRNAs By Luo transcriptId=linc_luo_1461 cpcScore=-1.2905600 cnci=-0.2615675																									8.65551	8.65568	8.62932	8.61664
TC12002891.hg.1	6.07547	5.61912	1.37207	up	0.0003184	0.0558044	RARG	M32074	retinoic acid receptor, gamma	protein_coding	chr12	-	M32074	53609542	53613946	28	12q13	5916	M32074	NONCODE	accn=M32074 class=mRNAlike lncRNA name=NULL ref=H-invitational v7.5 transcriptId=HIT000195453 cpcScore=-1.1518200 cnci=-0.0110249	M32074	P13631	M32074	Hs.1497	adrenal gland| ascites| bladder| blood| bone| brain| cervix| connective tissue| embryonic tissue| esophagus| eye| heart| intestine| kidney| larynx| liver| lung| lymph node| mammary gland| mouth| muscle| nerve| ovary| pancreas| placenta| prostate| skin| spleen| stomach| testis| thymus| thyroid| trachea| umbilical cord| uterus| vascular|adrenal tumor| bladder carcinoma| breast (mammary gland) tumor…	M32074	GO:0000122	negative regulation of transcription from RNA polymerase II promoter	inferred from sequence or structural similarity	M32074	GO:0005634	nucleus	inferred from direct assay	M32074	GO:0003677	DNA binding	inferred from sequence or structural similarity	M32074	GenMAPP	Nuclear_Receptors					5.98363	6.05477	6.14544	6.11803
TC04001437.hg.1	3.53299	4.36956	-1.7858	down	0.00031916	0.0558044	MIR548AC	ENST00000408595	microRNA 548ac	miRNA	chr4	-	ENST00000408595	104343257	104343353	30		100616384	ENST00000408595	ENSEMBL	[retired] ncrna:miRNA chromosome:GRCh37:4:104343257:104343353:-1 gene:ENSG00000221522 gene_biotype:miRNA transcript_biotype:miRNA																									3.89884	3.68395	3.27253	3.27665
TC07001733.hg.1	2.82716	3.82711	-1.99993	down	0.000319621	0.0558044	AF520792	AF520792	Homo sapiens clone IMAGE: 267151 mRNA sequence.	other	chr7	-		104754467	104755465	30			AF520792	GenBank HTC	Homo sapiens clone IMAGE: 267151 mRNA sequence.																									2.89151	2.71897	2.76536	2.93278
TC05000828.hg.1	4.89834	4.59471	1.23425	up	0.000320582	0.0558044	CDX1	NM_001804	caudal type homeobox 1	protein_coding	chr5	+	NM_001804	149546344	149565107	130	5q32	1044	NM_001804	RefSeq	Homo sapiens caudal type homeobox 1 (CDX1), mRNA.	NM_001804	P47902	NM_001804	Hs.1545	ascites| intestine| colorectal tumor| gastrointestinal tumor| normal| fetus| adult	NM_001804	GO:0009887	organ morphogenesis	traceable author statement	NM_001804	GO:0005634	nucleus	inferred from electronic annotation	NM_001804	GO:0000980	RNA polymerase II distal enhancer sequence-specific DNA binding	inferred from direct assay				ENST00000231656	Pfam	IPR001356	Homeobox domain	4.84248	4.96447	4.93815	4.84826
TC13001326.hg.1	3.67758	3.28208	1.3154	up	0.000321893	0.0558044	linc-RASA3-5	TCONS_00021606-XLOC_010519		ncRNA	chr13	-		19184438	19185815	30			TCONS_00021606-XLOC_010519	Rinn lincRNA	linc-RASA3-5 chr13:-:19184437-19185815																									3.58837	3.763	3.7101	3.64885
TC02000538.hg.1	3.00838	3.7959	-1.7261	down	0.000322208	0.0558044	PLGLB1	NM_001032392	plasminogen-like B1	protein_coding	chr2	+	NM_001032392	88045921	88066896	120	2p11.2	5343	NM_001032392	RefSeq	Homo sapiens plasminogen-like B1 (PLGLB1), mRNA.	NM_001032392	Q02325	NM_001032392	Hs.652174	blood| brain| eye| liver| lung| lymph node| testis| uterus| germ cell tumor| leukemia| liver tumor| normal| fetus| adult					NM_001032392	GO:0005576	extracellular region	inferred from electronic annotation								ENST00000359481	Pfam	IPR003014	PAN-1 domain	3.21909	2.9727	3.02957	2.81217
TC03001776.hg.1	5.90214	5.55162	1.27502	up	0.000322356	0.0558044	FAM86HP	NR_024252	family with sequence similarity 86, member A pseudogene	pseudogene	chr3	-	NR_024252	129816625	129830276	60	3q22.1	729375	NR_024252	RefSeq	Homo sapiens family with sequence similarity 86, member H, pseudogene (FAM86HP), non-coding RNA.			NR_024252	Hs.123633	adrenal gland| brain| cervix| intestine| kidney| liver| lung| mammary gland| mouth| ovary| pancreas| placenta| stomach| uterus|adrenal tumor| breast (mammary gland) tumor| cervical tumor| colorectal tumor| gastrointestinal tumor| head and neck tumor| liver tumor| lung tumor| normal| ovarian tumor| fetus| adult																				5.91882	5.76313	5.93755	5.98907
TC19001268.hg.1	5.48097	4.88643	1.50999	up	0.000324929	0.0558044	CPAMD8	NM_015692	C3 and PZP-like, alpha-2-macroglobulin domain containing 8	protein_coding	chr19	-	NM_015692	17003758	17137625	440	19p13.11	27151	NM_015692	RefSeq	Homo sapiens C3 and PZP-like, alpha-2-macroglobulin domain containing 8 (CPAMD8), mRNA.	NM_015692	Q8IZJ3	NM_015692	Hs.631644	bone| brain| cervix| connective tissue| embryonic tissue| eye| kidney| larynx| lung| muscle| ovary| placenta| prostate| spleen| stomach| testis| thymus| thyroid| trachea| uterus| cervical tumor| chondrosarcoma| gastrointestinal tumor| germ cell tumor| glioma| head and neck tumor| kidney tumor| lung tumor| non-neoplasia| normal| uterine tumor| blastocyst| fetus| adult	NM_015692	GO:0010951	negative regulation of endopeptidase activity	inferred from electronic annotation	NM_015692	GO:0005615	extracellular space	inferred from electronic annotation	NM_015692	GO:0004867	serine-type endopeptidase inhibitor activity	inferred from electronic annotation				ENST00000291440	Pfam	IPR002890	Alpha-2-macroglobulin, N-terminal	5.43857	5.53991	5.47105	5.47435
TC06002492.hg.1	3.87122	3.53682	1.26085	up	0.000325741	0.0558044	NR_003129_7	NR_003129_7		ncRNA	chr6	+		3616913	3622326	90			NR_003129_7	NONCODE	accn=NR_003129_7 class=lncRNA name= ref=RefGeneNoncode transcriptId=NR_003129_7 cpcScore=-0.1916090 cnci=-0.1529296																									3.85246	3.86334	3.86641	3.90265
TC15001491.hg.1	5.57177	5.98497	-1.33163	down	0.000326986	0.0558044	SLTM	NM_001013843	SAFB-like, transcription modulator	protein_coding	chr15	-	NM_001013843	59171244	59225886	337	15q22.1	79811	NM_001013843	RefSeq	Homo sapiens SAFB-like, transcription modulator (SLTM), transcript variant 2, mRNA.	NM_001013843	Q9NWH9	NM_001013843	Hs.512932	adrenal gland| ascites| bladder| blood| bone| bone marrow| brain| cervix| connective tissue| ear| embryonic tissue| esophagus| eye| heart| intestine| kidney| larynx| liver| lung| lymph| lymph node| mammary gland| mouth| muscle| nerve| ovary| pancreas| parathyroid| pharynx| pituitary gland| placenta| prostate| skin| spleen| stomach| testis| thymus| thyroid| tonsil| trachea| umbilical cord| uterus|…	NM_001013843	GO:0006351	transcription, DNA-templated	inferred from electronic annotation	NM_001013843	GO:0005634	nucleus	inferred from direct assay	NM_001013843	GO:0000166	nucleotide binding	inferred from electronic annotation				ENST00000380516	Pfam	IPR000504	RNA recognition motif domain	5.60898	5.53216	5.54817	5.59778
TC09001104.hg.1	3.52903	4.07732	-1.46234	down	0.000327873	0.0558044	ZNF658B	NR_003528	zinc finger protein 658B, pseudogene	pseudogene	chr9	-	NR_003528	41588833	41609544	80	9p12	401509	NR_003528	RefSeq	Homo sapiens zinc finger protein 658B, pseudogene (ZNF658B), non-coding RNA.	NR_003528	Q4V348	NR_003528	Hs.730226		NR_003528	GO:0006351	transcription, DNA-templated	inferred from electronic annotation	NR_003528	GO:0005634	nucleus	inferred from electronic annotation	NR_003528	GO:0003677	DNA binding	inferred from electronic annotation								3.3009	3.55726	3.62831	3.62967
TC16001305.hg.1	4.69479	4.33821	1.28039	up	0.000329492	0.0558044	SLC38A8	NM_001080442	solute carrier family 38, member 8	protein_coding	chr16	-	NM_001080442	84043389	84075762	100	16q23.3	146167	NM_001080442	RefSeq	Homo sapiens solute carrier family 38, member 8 (SLC38A8), mRNA.	NM_001080442	A6NNN8	NM_001080442	Hs.461575	brain| testis| germ cell tumor| normal| adult	NM_001080442	GO:0006814	sodium ion transport	inferred from electronic annotation	NM_001080442	GO:0016021	integral component of membrane	inferred from electronic annotation								ENST00000299709	Pfam	IPR013057	Amino acid transporter, transmembrane	4.63763	4.71777	4.68776	4.73601
TC01004450.hg.1	3.28082	2.83938	1.35795	up	0.000330545	0.0558044	linc-UBE2U	TCONS_00000970-XLOC_000235		ncRNA	chr1	+		64652512	64657832	30			TCONS_00000970-XLOC_000235	Rinn lincRNA	linc-UBE2U chr1:+:64652511-64657832																									3.22101	3.20293	3.26966	3.42967
TC6_cox_hap2000048.hg.1	5.00018	4.52552	1.38958	up	0.000331616	0.0558044	MIR4640	NR_039783	microRNA 4640	miRNA	chr6_cox_hap2	+	NR_039783	2370758	2370847	30		100616237	NR_039783	RefSeq	Homo sapiens microRNA 4640 (MIR4640), microRNA.																									5.09246	5.04217	4.97542	4.89066
TC6_dbb_hap3000041.hg.1	5.00018	4.52552	1.38958	up	0.000331616	0.0558044	MIR4640	NR_039783	microRNA 4640	miRNA	chr6_dbb_hap3	+	NR_039783	2152762	2152851	30		100616237	NR_039783	RefSeq	Homo sapiens microRNA 4640 (MIR4640), microRNA.																									5.09246	5.04217	4.97542	4.89066
TC6_mann_hap4000043.hg.1	5.00018	4.52552	1.38958	up	0.000331616	0.0558044	MIR4640	NR_039783	microRNA 4640	miRNA	chr6_mann_hap4	+	NR_039783	2206745	2206834	30		100616237	NR_039783	RefSeq	Homo sapiens microRNA 4640 (MIR4640), microRNA.																									5.09246	5.04217	4.97542	4.89066
TC6_mcf_hap5000034.hg.1	5.00018	4.52552	1.38958	up	0.000331616	0.0558044	MIR4640	NR_039783	microRNA 4640	miRNA	chr6_mcf_hap5	+	NR_039783	2240617	2240706	30		100616237	NR_039783	RefSeq	Homo sapiens microRNA 4640 (MIR4640), microRNA.																									5.09246	5.04217	4.97542	4.89066
TC6_qbl_hap6000041.hg.1	5.00018	4.52552	1.38958	up	0.000331616	0.0558044	MIR4640	NR_039783	microRNA 4640	miRNA	chr6_qbl_hap6	+	NR_039783	2151647	2151736	30		100616237	NR_039783	RefSeq	Homo sapiens microRNA 4640 (MIR4640), microRNA.																									5.09246	5.04217	4.97542	4.89066
TC09002878.hg.1	4.09909	3.57989	1.43317	up	0.000332423	0.0558044	AK093220	AK093220		ncRNA	chr9	-		140954806	140956852	40			AK093220	NONCODE	accn=AK093220 class=mRNAlike lncRNA name=Human lncRNA ref=JounralRNA transcriptId=4294 cpcScore=-1.0583200 cnci=-0.2008994			AK093220	Hs.654904	placenta| testis| normal| adult																				4.01955	4.08383	3.99029	4.3027
TC01003030.hg.1	5.19192	4.7967	1.31514	up	0.000332796	0.0558044	IGSF3	NM_001007237	immunoglobulin superfamily, member 3	protein_coding	chr1	-	NM_001007237	117117031	117210377	220	1p13	3321	NM_001007237	RefSeq	Homo sapiens immunoglobulin superfamily, member 3 (IGSF3), transcript variant 2, mRNA.	NM_001007237	O75054	NM_001007237	Hs.171057	bladder| bone| brain| connective tissue| ear| embryonic tissue| eye| heart| intestine| kidney| liver| lung| mammary gland| mouth| muscle| pharynx| placenta| prostate| skin| stomach| testis| thymus| thyroid| trachea| uterus| bladder carcinoma| breast (mammary gland) tumor| chondrosarcoma| colorectal tumor| gastrointestinal tumor| germ cell tumor| glioma| head and neck tumor| kidney tumor| liver tu…	NM_001007237	GO:0032808	lacrimal gland development	inferred from mutant phenotype	NM_001007237	GO:0016021	integral component of membrane	inferred from electronic annotation	NM_001007237	GO:0003674	molecular_function	no biological data available				ENST00000369483	Pfam	IPR013106	Immunoglobulin V-set domain	5.20144	5.07978	5.17453	5.31192
TC08000035.hg.1	3.43228	2.91646	1.42981	up	0.000333142	0.0558044	USP17L4	OTTHUMT00000318953	ubiquitin specific peptidase 17-like 4	protein_coding	chr8	+	OTTHUMT00000318953	7194637	7196229	30			OTTHUMT00000318953	Havana transcript	cdna:all chromosome:VEGA56:8:7337115:7338707:1 Gene:OTTHUMG00000150574																									3.72751	3.26495	3.43779	3.29889
TC0X000038.hg.1	5.50506	5.11269	1.31255	up	0.000333739	0.0558044	CLCN4	NM_001830	chloride channel, voltage-sensitive 4	protein_coding	chrX	+	NM_001830	10124985	10205700	210	Xp22.3	1183	NM_001830	RefSeq	Homo sapiens chloride channel, voltage-sensitive 4 (CLCN4), transcript variant 1, mRNA.	NM_001830	P51793	NM_001830	Hs.495674	brain| connective tissue| eye| heart| kidney| larynx| liver| lung| lymph node| mammary gland| muscle| ovary| pancreas| parathyroid| pituitary gland| skin| testis| thyroid| vascular| breast (mammary gland) tumor| germ cell tumor| head and neck tumor| kidney tumor| leukemia| liver tumor| lymphoma| non-neoplasia| normal| ovarian tumor| pancreatic tumor| skin tumor| fetus| infant| juvenile| adult	NM_001830	GO:0006810	transport	traceable author statement	NM_001830	GO:0010008	endosome membrane	traceable author statement	NM_001830	GO:0005247	voltage-gated chloride channel activity	inferred from electronic annotation				ENST00000380829	Pfam	IPR000644	CBS domain	5.41608	5.42628	5.5347	5.64319
TC14001992.hg.1	4.08604	5.1059	-2.02772	down	0.000335077	0.0558044	MIS18BP1	AJ242977	MIS18 binding protein 1	protein_coding	chr14	-	AJ242977	45693512	45700373	35	14q21.2	55320	AJ242977	NONCODE	accn=AJ242977 class=mRNAlike lncRNA name=NULL ref=H-invitational v7.5 transcriptId=HIT000245496 cpcScore=3.5811600 cnci=-0.5612393	AJ242977	Q6P0N0	AJ242977	Hs.732769	adrenal gland| ascites| bladder| blood| bone| bone marrow| brain| cervix| connective tissue| embryonic tissue| heart| intestine| kidney| liver| lung| lymph| lymph node| mammary gland| mouth| muscle| nerve| pancreas| pharynx| placenta| prostate| skin| spleen| stomach| testis| thymus| umbilical cord| uterus| vascular|adrenal tumor| bladder carcinoma| cervical tumor| chondrosarcoma| colorectal tumor…	AJ242977	GO:0006334	nucleosome assembly	traceable author statement	AJ242977	GO:0000775	chromosome, centromeric region	inferred from electronic annotation	AJ242977	GO:0003677	DNA binding	inferred from electronic annotation								3.96145	4.08861	4.03733	4.25675
TC21000533.hg.1	6.38857	5.98092	1.32652	up	0.00033522	0.0558044	KRTAP12-2	NM_181684	keratin associated protein 12-2	protein_coding	chr21	-	NM_181684	46086106	46086844	55	21q22.3	353323	NM_181684	RefSeq	Homo sapiens keratin associated protein 12-2 (KRTAP12-2), mRNA.	NM_181684	P59991	NM_181684	Hs.567902						NM_181684	GO:0045095	keratin filament	inferred from electronic annotation								ENST00000360770	Pfam	IPR007951	Keratin-associated protein, PMG type	6.42841	6.30673	6.39086	6.42828
TC03000756.hg.1	5.10212	5.68102	-1.4937	down	0.000336014	0.0558044	SLC25A36	NM_001104647	solute carrier family 25 (pyrimidine nucleotide carrier ), member 36	protein_coding	chr3	+	NM_001104647	140660662	140698785	200	3q23	55186	NM_001104647	RefSeq	Homo sapiens solute carrier family 25 (pyrimidine nucleotide carrier ), member 36 (SLC25A36), transcript variant 1, mRNA.	NM_001104647	Q96CQ1	NM_001104647	Hs.144130	adrenal gland| ascites| bladder| blood| bone| bone marrow| brain| cervix| connective tissue| ear| embryonic tissue| esophagus| eye| heart| intestine| kidney| liver| lung| lymph| lymph node| mammary gland| mouth| muscle| nerve| ovary| pancreas| parathyroid| pituitary gland| placenta| prostate| salivary gland| skin| stomach| testis| thymus| thyroid| trachea| uterus| bladder carcinoma| breast (mamma…	NM_001104647	GO:0032355	response to estradiol	inferred from direct assay	NM_001104647	GO:0005743	mitochondrial inner membrane	inferred from electronic annotation								ENST00000324194	Pfam	IPR018108	Mitochondrial substrate/solute carrier	5.1946	5.12079	5.06993	5.02318
TC11003235.hg.1	3.39908	2.90874	1.40478	up	0.000337375	0.0558044	KRTAP5-11	AB126080	keratin associated protein 5-11	protein_coding	chr11	-	AB126080	71293040	71293921	30	11q13.4	440051	AB126080	NONCODE	accn=AB126080 class=mRNAlike lncRNA name=Human lncRNA ref=JounralRNA transcriptId=5277 cpcScore=0.9181290 cnci=-0.0878273	AB126080	Q6L8G4	AB126080	Hs.679617	connective tissue| soft tissue/muscle tissue tumor| adult					AB126080	GO:0045095	keratin filament	inferred from electronic annotation												3.46189	3.49878	3.36597	3.26968
TC02002379.hg.1	1.50206	2.35078	-1.8009	down	0.000338424	0.0558044	AC092786.1	ENST00000408835		miRNA	chr2	-		137402678	137402762	30			ENST00000408835	ENSEMBL	ncrna:novel chromosome:GRCh38:2:136645108:136645192:-1 gene:ENSG00000221762 gene_biotype:miRNA transcript_biotype:miRNA																									1.76664	1.57724	1.27142	1.39292
TC09002591.hg.1	11.9619	11.2867	1.59681	up	0.000338504	0.0558044	linc-FAM108B1	TCONS_l2_00029401-XLOC_l2_015238		ncRNA	chr9	-		74622672	74623052	48			TCONS_l2_00029401-XLOC_l2_015238	Broad TUCP	linc-FAM108B1 chr9:-:74622744-74623032																									11.7808	11.7943	11.9947	12.2776
TC15001051.hg.1	5.77862	6.37717	-1.5142	down	0.000340245	0.0558044	WHAMMP3	NR_003521	WAS protein homolog associated with actin, golgi membranes and microtubules pseudogene 3	pseudogene	chr15	-	NR_003521	23187728	23208417	140	15q11.2	339005	NR_003521	RefSeq	Homo sapiens WAS protein homolog associated with actin, golgi membranes and microtubules pseudogene 3 (WHAMMP3), non-coding RNA.	NR_003521	Q1A5X7	NR_003521	Hs.212670	blood| brain| connective tissue| ear| embryonic tissue| kidney| lung| ovary| placenta| skin| testis| trachea| uterus| leukemia| lung tumor| non-neoplasia| normal| ovarian tumor| uterine tumor| fetus| adult																				5.89183	5.70533	5.73974	5.77758
TC14002120.hg.1	4.07438	3.47561	1.51443	up	0.000340663	0.0558044	linc-C14orf102-1	TCONS_00022832-XLOC_011103		ncRNA	chr14	-		90982163	90983553	30			TCONS_00022832-XLOC_011103	Rinn lincRNA	linc-C14orf102-1 chr14:-:90982162-90983553																									4.04887	3.97673	4.0318	4.24011
TC08001172.hg.1	6.08731	5.51277	1.48921	up	0.000340849	0.0558044	MIR486-1	NR_030161	microRNA 486-1	ncRNA	chr8	-	NR_030161	41517959	41518026	30	8p11.21	619554	NR_030161	RefSeq	Homo sapiens microRNA 486-1 (MIR486-1), microRNA.																									5.95922	5.93992	6.20679	6.24333
TC05000030.hg.1	5.34035	4.91513	1.34278	up	0.000341731	0.0558044	IRX1	NM_024337	iroquois homeobox 1	protein_coding	chr5	+	NM_024337	3596168	3601517	60	5p15.3	79192	NM_024337	RefSeq	Homo sapiens iroquois homeobox 1 (IRX1), mRNA.	NM_024337	P78414	NM_024337	Hs.424156	brain| ear| embryonic tissue| eye| heart| kidney| lung| nerve| ovary| pancreas| glioma| normal| ovarian tumor| fetus| adult	NM_024337	GO:0006355	regulation of transcription, DNA-templated	inferred from electronic annotation	NM_024337	GO:0005634	nucleus	inferred from electronic annotation	NM_024337	GO:0003700	sequence-specific DNA binding transcription factor activity	inferred from electronic annotation				ENST00000302006	Pfam	IPR001356	Homeobox domain	5.34643	5.42888	5.3058	5.28031
TC19000393.hg.1	5.47752	5.8914	-1.33227	down	0.000342394	0.0558044	ZNF429	NM_001001415	zinc finger protein 429	protein_coding	chr19	+	NM_001001415	21688437	21739070	80	19p12	353088	NM_001001415	RefSeq	Homo sapiens zinc finger protein 429 (ZNF429), mRNA.	NM_001001415	Q86V71	NM_001001415	Hs.572567	testis| normal	NM_001001415	GO:0006351	transcription, DNA-templated	inferred from electronic annotation	NM_001001415	GO:0005634	nucleus	inferred from electronic annotation	NM_001001415	GO:0003677	DNA binding	inferred from electronic annotation				ENST00000358491	Pfam	IPR001909	Krueppel-associated box	5.56743	5.44742	5.49552	5.3997
TC17001818.hg.1	5.69584	5.27266	1.34088	up	0.000342487	0.0558044	C17orf58	NM_181655	chromosome 17 open reading frame 58	protein_coding	chr17	-	NM_181655	65987217	65989765	94	17q24.2	284018	NM_181655	RefSeq	Homo sapiens chromosome 17 open reading frame 58 (C17orf58), transcript variant 1, mRNA.	NM_181655	Q2M2W7	NM_181655	Hs.90790	blood| bone| bone marrow| brain| cervix| connective tissue| embryonic tissue| eye| heart| intestine| kidney| larynx| lung| mammary gland| mouth| ovary| pancreas| placenta| salivary gland| skin| testis| thyroid| vascular| breast (mammary gland) tumor| cervical tumor| chondrosarcoma| germ cell tumor| glioma| head and neck tumor| leukemia| lung tumor| non-neoplasia| normal| primitive neuroectodermal…																				5.59653	5.67089	5.73382	5.78213
TC20000876.hg.1	7.51645	6.34786	2.24792	up	0.000343006	0.0558044	SLPI	NM_003064	secretory leukocyte peptidase inhibitor	protein_coding	chr20	-	NM_003064	43880879	43883206	40	20q12	6590	NM_003064	RefSeq	Homo sapiens secretory leukocyte peptidase inhibitor (SLPI), mRNA.	NM_003064	P03973	NM_003064	Hs.517070	adipose tissue| blood| bone marrow| brain| cervix| connective tissue| eye| heart| intestine| kidney| larynx| liver| lung| lymph node| mammary gland| mouth| ovary| pancreas| pharynx| pituitary gland| placenta| prostate| salivary gland| skin| stomach| testis| trachea| uterus| breast (mammary gland) tumor| cervical tumor| chondrosarcoma| colorectal tumor| gastrointestinal tumor| glioma| head and nec…	NM_003064	GO:0010951	negative regulation of endopeptidase activity	inferred from electronic annotation	NM_003064	GO:0031012	extracellular matrix	inferred from direct assay	NM_003064	GO:0004866	endopeptidase inhibitor activity	traceable author statement				ENST00000338380	Pfam	IPR008197	Whey acidic protein-type 4-disulphide core	7.3815	7.45758	7.38945	7.83727
TC15002474.hg.1	3.61869	3.19152	1.3446	up	0.000344207	0.0558044	linc-FMN1-2	TCONS_l2_00009004-XLOC_l2_004870		ncRNA	chr15	-		33595778	33602861	80			TCONS_l2_00009004-XLOC_l2_004870	Broad TUCP	linc-FMN1-2 chr15:-:33595777-33602798																									3.76324	3.67946	3.53585	3.49623
TC12002709.hg.1	4.37428	4.0027	1.29377	up	0.000345038	0.0558044	LOC283440	ENST00000536497	uncharacterized LOC283440	ncRNA	chr12	-	ENST00000536497	2870366	2879621	40	12p13.33	283440	ENST00000536497	NONCODE	accn=NULL class=lncRNA name= ref=EnsemblNoncode transcriptId=ENST00000536497 cpcScore=3.8345000 cnci=-0.0953868 gene:ENSG00000255669			ENST00000536497	Hs.658536	blood| normal																				4.40198	4.42261	4.31548	4.35704
TC11002840.hg.1	3.07396	2.56243	1.42556	up	0.000345101	0.0558044	linc-AMOTL1-1	TCONS_00019977-XLOC_009254		ncRNA	chr11	+		94464169	94476109	40			TCONS_00019977-XLOC_009254	Rinn lincRNA	linc-AMOTL1-1 chr11:+:94464168-94475371																									2.84453	3.15642	3.21712	3.07779
TC0X000562.hg.1	3.94849	3.38033	1.48263	up	0.000345922	0.0558044	MIR1911	NR_031732	microRNA 1911	miRNA	chrX	+	NR_031732	113997744	113997823	30		100302222	NR_031732	RefSeq	Homo sapiens microRNA 1911 (MIR1911), microRNA.																									3.90166	4.08309	3.7881	4.02112
TC11001317.hg.1	3.25525	2.87463	1.3019	up	0.000346211	0.0558044	OR51H1P	ENST00000322059	olfactory receptor, family 51, subfamily H, member 1 pseudogene	pseudogene	chr11	-	ENST00000322059	4880886	4881794	30			ENST00000322059	ENSEMBL	havana:putative chromosome:GRCh38:11:4859656:4860564:-1 gene:ENSG00000176904 gene_biotype:protein_coding transcript_biotype:protein_coding	ENST00000322059	Q8NH63				ENST00000322059	GO:0007186	G-protein coupled receptor signaling pathway	inferred from electronic annotation	ENST00000322059	GO:0005886	plasma membrane	traceable author statement	ENST00000322059	GO:0004930	G-protein coupled receptor activity	inferred from electronic annotation				ENST00000322059	Pfam	IPR000276	G protein-coupled receptor, rhodopsin-like	3.18447	3.23649	3.3344	3.26564
TC06002829.hg.1	4.57034	5.15488	-1.49957	down	0.000346579	0.0558044	EFHC1	NR_033327	EF-hand domain (C-terminal) containing 1	protein_coding	chr6	+	NR_033327	52284994	52360583	100	6p12.3	114327	NR_033327	NONCODE	accn=NR_033327 class=lncRNA name= ref=RefGeneNoncode transcriptId=NR_033327 cpcScore=5.9570900 cnci=-0.2833691	NR_033327	Q5JVL4	NR_033327	Hs.403171	adrenal gland| ascites| bone| bone marrow| brain| connective tissue| embryonic tissue| esophagus| eye| heart| kidney| larynx| liver| lung| lymph node| mammary gland| mouth| muscle| ovary| pancreas| pharynx| pituitary gland| placenta| prostate| skin| stomach| testis| thymus| thyroid| trachea| uterus| vascular| breast (mammary gland) tumor| chondrosarcoma| esophageal tumor| gastrointestinal tumor| …					NR_033327	GO:0005930	axoneme	inferred from sequence or structural similarity	NR_033327	GO:0005509	calcium ion binding	inferred from electronic annotation								4.81704	4.59395	4.50762	4.36274
TC03002342.hg.1	5.72926	5.22606	1.41735	up	0.0003466	0.0558044	BC039681	BC039681		ncRNA	chr3	+		52273280	52275113	30			BC039681	NONCODE	accn=BC039681 class=mRNAlike lncRNA name=Human lncRNA ref=JounralRNA transcriptId=1796 cpcScore=1.5500600 cnci=-0.1817959			BC039681	Hs.281931	blood| lymph| skin| spleen| thymus| lymphoma| normal| skin tumor| adult																				5.72113	5.63263	5.83776	5.72552
TC05002088.hg.1	3.91602	3.57001	1.27104	up	0.00034733	0.0558044	LOC100996385	ENST00000512675	uncharacterized LOC100996385	ncRNA	chr5	-	ENST00000512675	175476681	175489024	30		100996385	ENST00000512675	ENSEMBL	havana:putative chromosome:GRCh38:5:176049678:176062021:-1 gene:ENSG00000248469 gene_biotype:protein_coding transcript_biotype:protein_coding	ENST00000512675	D6RHG6	ENST00000512675	Hs.382347	brain| connective tissue| testis| glioma| soft tissue/muscle tissue tumor| adult																				3.88296	3.94829	3.90089	3.93195
TC10002250.hg.1	2.80209	2.44825	1.27796	up	0.000348347	0.0558044	linc-BTRC-3	TCONS_00018311-XLOC_008585		ncRNA	chr10	+		102950527	102953866	50			TCONS_00018311-XLOC_008585	Rinn lincRNA	linc-BTRC-3 chr10:+:102950827-102951429																									2.78088	2.75602	2.78699	2.88445
TC19000286.hg.1	4.32077	3.74146	1.49414	up	0.000348736	0.0558044	DQ587284	DQ587284	Homo sapiens piRNA piR-54396, complete sequence.	other	chr19	+		16146831	16146881	27			DQ587284	GenBank	Homo sapiens piRNA piR-54396, complete sequence.																									4.37784	4.22455	4.21772	4.46298
TC03001302.hg.1	6.17729	6.73685	-1.47381	down	0.000351576	0.0560768	CSRNP1	NM_033027	cysteine-serine-rich nuclear protein 1	protein_coding	chr3	-	NM_033027	39183342	39196053	113	3p22	64651	NM_033027	RefSeq	Homo sapiens cysteine-serine-rich nuclear protein 1 (CSRNP1), mRNA.	NM_033027	Q96S65	NM_033027	Hs.370950	adipose tissue| ascites| blood| bone| brain| connective tissue| embryonic tissue| eye| heart| intestine| lung| lymph node| mammary gland| muscle| ovary| pancreas| placenta| prostate| skin| stomach| testis| thyroid| umbilical cord| uterus| vascular| breast (mammary gland) tumor| chondrosarcoma| colorectal tumor| gastrointestinal tumor| germ cell tumor| glioma| head and neck tumor| leukemia| lung t…	NM_033027	GO:0006351	transcription, DNA-templated	inferred from electronic annotation	NM_033027	GO:0005634	nucleus	inferred from sequence or structural similarity	NM_033027	GO:0001228	RNA polymerase II transcription regulatory region sequence-specific DNA binding transcription factor activity involved in positive regulation of transcription	inferred from electronic annotation								6.04246	6.15561	6.2406	6.27049
TC11002288.hg.1	9.77086	10.3069	-1.45001	down	0.0003521	0.0560768	AP001781.1	ENST00000516495		other	chr11	-		111692163	111692236	30			ENST00000516495	ENSEMBL	[retired] ncrna:miRNA chromosome:GRCh37:11:111692163:111692236:-1 gene:ENSG00000252304 gene_biotype:miRNA transcript_biotype:miRNA																									9.76357	9.75015	9.61663	9.95309
TC12002818.hg.1	5.56423	6.24513	-1.60314	down	0.000356199	0.0565694	CAPRIN2	NR_038177	caprin family member 2	protein_coding	chr12	-	NR_038177	30862486	30907448	170	12p11	65981	NR_038177	NONCODE	accn=NR_038177 class=lncRNA name= ref=RefGeneNoncode transcriptId=NR_038177 cpcScore=11.3612000 cnci=-0.3034424	NR_038177	Q6IMN6	NR_038177	Hs.234355	ascites| bladder| blood| bone| brain| connective tissue| ear| embryonic tissue| eye| heart| intestine| kidney| liver| lung| lymph node| mammary gland| mouth| muscle| nerve| ovary| pancreas| parathyroid| placenta| prostate| skin| spleen| stomach| testis| trachea| umbilical cord| uterus| vascular| chondrosarcoma| colorectal tumor| gastrointestinal tumor| germ cell tumor| glioma| head and neck tumor…	NR_038177	GO:0017148	negative regulation of translation	inferred from electronic annotation	NR_038177	GO:0005634	nucleus	inferred from direct assay	NR_038177	GO:0003723	RNA binding	inferred from electronic annotation								5.83348	5.7223	5.35937	5.34177
TC06004053.hg.1	5.60885	6.05749	-1.36475	down	0.000356868	0.0565694	SNX14	NM_020468	sorting nexin 14	protein_coding	chr6	-	NM_020468	86215214	86303874	460	6q14.3	57231	NM_020468	RefSeq	Homo sapiens sorting nexin 14 (SNX14), transcript variant 2, mRNA.	NM_020468	Q9Y5W7	NM_020468	Hs.485871	ascites| bladder| blood| bone| bone marrow| brain| cervix| connective tissue| embryonic tissue| eye| heart| intestine| kidney| liver| lung| lymph| lymph node| mammary gland| mouth| muscle| nerve| ovary| pancreas| pituitary gland| placenta| prostate| salivary gland| skin| spleen| stomach| testis| thymus| thyroid| trachea| uterus| vascular| breast (mammary gland) tumor| chondrosarcoma| colorectal t…	NM_020468	GO:0015031	protein transport	inferred from electronic annotation	NM_020468	GO:0016021	integral component of membrane	inferred from electronic annotation	NM_020468	GO:0035091	phosphatidylinositol binding	inferred from electronic annotation				ENST00000346348	Pfam	IPR000342	Regulator of G protein signalling domain	5.6788	5.69893	5.4817	5.57598
TC08001844.hg.1	4.1113	5.20071	-2.12787	down	0.000358372	0.0566171	uc003xel.1	uc003xel.1		ncRNA	chr8	+		25272426	25273231	30			uc003xel.1	NONCODE	accn=NULL class=lncRNA name= ref=UCSCGeneNoncode transcriptId=uc003xel.1 cpcScore=-1.2546200 cnci=-0.3463701																									4.5191	3.87488	4.17459	3.87664
TC03002732.hg.1	5.29207	6.87231	-2.99019	down	0.000358846	0.0566171	HES1	BC005178	hes family bHLH transcription factor 1	protein_coding	chr3	+	BC005178	193853937	193854176	30	3q28-q29	3280	BC005178	NONCODE	accn=BC005178 class=mRNAlike lncRNA name=NULL ref=H-invitational v7.5 transcriptId=HIT000086478 cpcScore=-1.1429900 cnci=-1.0000000	BC005178	Q9BS99	BC005178	Hs.250666	ascites| bladder| blood| bone| brain| connective tissue| ear| embryonic tissue| esophagus| eye| heart| intestine| kidney| liver| lung| lymph node| mammary gland| mouth| muscle| nerve| ovary| pancreas| parathyroid| pharynx| pituitary gland| placenta| prostate| skin| spleen| stomach| testis| thymus| thyroid| umbilical cord| uterus| vascular| bladder carcinoma| breast (mammary gland) tumor| chondros…	BC005178	GO:0000122	negative regulation of transcription from RNA polymerase II promoter	inferred from direct assay	BC005178	GO:0005634	nucleus	inferred from direct assay	BC005178	GO:0001078	RNA polymerase II core promoter proximal region sequence-specific DNA binding transcription factor activity involved in negative regulation of transcription	inferred from sequence or structural similarity								5.13458	5.03397	5.94671	5.05301
TC04000176.hg.1	4.45765	4.98155	-1.43784	down	0.000361571	0.0569142	ANAPC4	NM_013367	anaphase promoting complex subunit 4	protein_coding	chr4	+	NM_013367	25378835	25420120	457	4p15.2	29945	NM_013367	RefSeq	Homo sapiens anaphase promoting complex subunit 4 (ANAPC4), transcript variant 2, mRNA.	NM_013367	Q9UJX5	NM_013367	Hs.152173	adipose tissue| adrenal gland| bladder| blood| bone| brain| connective tissue| ear| embryonic tissue| eye| heart| intestine| kidney| larynx| liver| lung| lymph| lymph node| mammary gland| nerve| ovary| pancreas| pharynx| pituitary gland| placenta| prostate| skin| spleen| stomach| testis| thymus| thyroid| trachea| uterus| vascular|adrenal tumor| bladder carcinoma| breast (mammary gland) tumor| cho…	NM_013367	GO:0000086	G2/M transition of mitotic cell cycle	traceable author statement	NM_013367	GO:0005634	nucleus	inferred from direct assay	NM_013367	GO:0004842	ubiquitin-protein transferase activity	traceable author statement								4.62139	4.58608	4.29642	4.32673
TC08000046.hg.1	5.55684	5.12216	1.35162	up	0.000364546	0.057019	FAM90A10P	NM_001164447	family with sequence similarity 90, member A10, pseudogene	pseudogene	chr8	+	NM_001164447	7626499	7629510	40	8p23.1	441328	NM_001164447	RefSeq	[retired] Homo sapiens family with sequence similarity 90, member A10 (FAM90A10), mRNA.																									5.3035	5.70879	5.59278	5.62231
TC04002556.hg.1	5.17828	5.91349	-1.66465	down	0.000364592	0.057019	CLOCK	BX538337	clock circadian regulator	protein_coding	chr4	-	BX538337	56294074	56297591	60	4q12	9575	BX538337	NONCODE	accn=BX538337 class=mRNAlike lncRNA name=Human lncRNA ref=JounralRNA transcriptId=2510 cpcScore=-1.1497500 cnci=-0.4165113	BX538337	O15516	BX538337	Hs.436975	adipose tissue| adrenal gland| ascites| bladder| bone| bone marrow| brain| connective tissue| embryonic tissue| eye| heart| intestine| kidney| liver| lung| lymph node| mammary gland| mouth| muscle| nerve| ovary| pancreas| parathyroid| pharynx| pituitary gland| placenta| prostate| skin| spleen| testis| thymus| thyroid| tonsil| trachea| uterus| vascular| breast (mammary gland) tumor| chondrosarcoma…	BX538337	GO:0000077	DNA damage checkpoint	inferred from mutant phenotype	BX538337	GO:0005634	nucleus	inferred from direct assay	BX538337	GO:0000978	RNA polymerase II core promoter proximal region sequence-specific DNA binding	inferred from direct assay	BX538337	GenMAPP	Circadian_Exercise					5.227	5.30177	5.22719	4.95714
TC15001922.hg.1	3.57394	4.38854	-1.7588	down	0.00036477	0.057019	NR2F2-AS1	ENST00000502125	NR2F2 antisense RNA 1	antisense	chr15	-	ENST00000502125	96670598	96870590	265	15q26.2	644192	ENST00000502125	ENSEMBL	havana:known chromosome:GRCh38:15:96268772:96327361:-1 gene:ENSG00000247809 gene_biotype:antisense transcript_biotype:antisense	ENST00000502125	Q6ZQY7	ENST00000502125	Hs.58690	brain| connective tissue| embryonic tissue| eye| kidney| liver| lung| muscle| placenta| prostate| spleen| testis| trachea| uterus| chondrosarcoma| germ cell tumor| normal| soft tissue/muscle tissue tumor| fetus| adult																				3.65805	3.5619	3.63561	3.44023
TC04001348.hg.1	3.67404	4.14909	-1.38997	down	0.000367202	0.0572258	HELQ	NM_133636	helicase, POLQ-like	protein_coding	chr4	-	NM_133636	84328496	84377025	258	4q21.23	113510	NM_133636	RefSeq	Homo sapiens helicase, POLQ-like (HELQ), mRNA.	NM_133636	Q8TDG4	NM_133636	Hs.480101	blood| bone| brain| cervix| connective tissue| ear| embryonic tissue| eye| heart| intestine| kidney| liver| lung| lymph node| mammary gland| mouth| muscle| pancreas| spleen| testis| thymus| thyroid| trachea| uterus| vascular| breast (mammary gland) tumor| chondrosarcoma| colorectal tumor| gastrointestinal tumor| germ cell tumor| glioma| head and neck tumor| leukemia| liver tumor| non-neoplasia| n…	NM_133636	GO:0000724	double-strand break repair via homologous recombination	inferred from mutant phenotype	NM_133636	GO:0005634	nucleus	inferred from direct assay	NM_133636	GO:0003676	nucleic acid binding	inferred from electronic annotation				ENST00000295488	Pfam	IPR001650	Helicase, C-terminal	3.74711	3.71249	3.60934	3.62721
TC02000967.hg.1	6.64791	7.44392	-1.7363	down	0.000367788	0.0572258	7-Mar	NM_022826	membrane-associated ring finger (C3HC4) 7, E3 ubiquitin protein ligase	other	chr2	+	NM_022826	160569000	160625359	268	2q24.2	64844	NM_022826	RefSeq	Homo sapiens membrane-associated ring finger (C3HC4) 7, E3 ubiquitin protein ligase (MARCH7), transcript variant 2, mRNA.	NM_022826	Q9H992	NM_022826	Hs.529272	adipose tissue| adrenal gland| bladder| blood| bone| bone marrow| brain| connective tissue| ear| embryonic tissue| esophagus| eye| heart| intestine| kidney| larynx| liver| lung| lymph| lymph node| mammary gland| mouth| muscle| ovary| pancreas| pharynx| pituitary gland| placenta| prostate| salivary gland| skin| spleen| stomach| testis| thymus| thyroid| trachea| uterus| vascular|adrenal tumor| blad…	NM_022826	GO:0016567	protein ubiquitination	inferred from electronic annotation	ENST00000259050	GO:0005737	cytoplasm	inferred from electronic annotation	NM_022826	GO:0008270	zinc ion binding	inferred from electronic annotation				ENST00000259050	Pfam	IPR018957	Zinc finger, C3HC4 RING-type	6.80327	6.8576	6.46729	6.46347
TC14000654.hg.1	4.30518	3.81187	1.40767	up	0.000370849	0.0572969	MIR431	NR_029965	microRNA 431	miRNA	chr14	+	NR_029965	101347344	101347457	30	14q32.2	574038	NR_029965	RefSeq	Homo sapiens microRNA 431 (MIR431), microRNA.																									4.29896	4.44397	4.38913	4.08865
TC04001745.hg.1	5.41711	5.93456	-1.43142	down	0.0003711	0.0572969	MORF4	ENST00000434007	mortality factor 4	pseudogene	chr4	-	ENST00000434007	174537087	174537794	30			ENST00000434007	ENSEMBL	[retired]cdna:pseudogene chromosome:GRCh37:4:174537087:174537794:-1 gene:ENSG00000234801 gene_biotype:pseudogene transcript_biotype:processed_pseudogene																									5.41257	5.36668	5.42686	5.46235
TC07002426.hg.1	6.63032	7.53568	-1.87302	down	0.00037132	0.0572969	PTPN12	S69184	protein tyrosine phosphatase, non-receptor type 12	protein_coding	chr7	+	S69184	77200471	77214888	32	7q11.23	5782	S69184	NONCODE	accn=S69184 class=mRNAlike lncRNA name=NULL ref=H-invitational v7.5 transcriptId=HIT000216292 cpcScore=-0.1272470 cnci=-0.3426749	S69184	Q05209	S69184	Hs.61812	adipose tissue| adrenal gland| bladder| blood| bone| bone marrow| brain| cervix| connective tissue| ear| embryonic tissue| esophagus| eye| heart| intestine| kidney| liver| lung| lymph node| mammary gland| mouth| muscle| nerve| ovary| pancreas| pituitary gland| placenta| prostate| salivary gland| skin| spleen| stomach| testis| thymus| thyroid| trachea| uterus| vascular|adrenal tumor| breast (mamma…	S69184	GO:0006470	protein dephosphorylation	traceable author statement	S69184	GO:0002102	podosome	inferred from electronic annotation	S69184	GO:0004726	non-membrane spanning protein tyrosine phosphatase activity	traceable author statement								6.72704	6.5463	6.56844	6.67949
TC21000532.hg.1	5.29753	4.82111	1.39129	up	0.000372432	0.0572969	KRTAP12-4	NM_198698	keratin associated protein 12-4	protein_coding	chr21	-	NM_198698	46074130	46074576	30	21q22.3	386684	NM_198698	RefSeq	Homo sapiens keratin associated protein 12-4 (KRTAP12-4), mRNA.	NM_198698	P60329	NM_198698	Hs.689664						NM_198698	GO:0045095	keratin filament	inferred from electronic annotation												5.13727	5.17997	5.43722	5.43564
TC10001327.hg.1	4.25794	4.96277	-1.62995	down	0.000372488	0.0572969	EGR2	NM_000399	early growth response 2	protein_coding	chr10	-	NM_000399	64571756	64679660	190	10q21.1	1959	NM_000399	RefSeq	Homo sapiens early growth response 2 (EGR2), transcript variant 1, mRNA.	NM_000399	P11161	NM_000399	Hs.1395	blood| bone| brain| connective tissue| embryonic tissue| eye| intestine| kidney| larynx| lung| mammary gland| mouth| nerve| pancreas| placenta| skin| spleen| stomach| testis| thymus| thyroid| uterus| breast (mammary gland) tumor| chondrosarcoma| colorectal tumor| gastrointestinal tumor| germ cell tumor| glioma| head and neck tumor| kidney tumor| non-neoplasia| normal| pancreatic tumor| primitive …					NM_000399	GO:0005634	nucleus	not recorded	NM_000399	GO:0001102	RNA polymerase II activating transcription factor binding	inferred from sequence or structural similarity				ENST00000242480	Pfam	IPR007087	Zinc finger, C2H2	4.16573	4.28293	4.3773	4.20578
TC18000272.hg.1	4.75179	5.60325	-1.80432	down	0.00037495	0.0575445	THOC1	NM_005131	THO complex 1	protein_coding	chr18	-	NM_005131	214520	268059	240	18p11.32	9984	NM_005131	RefSeq	Homo sapiens THO complex 1 (THOC1), mRNA.	NM_005131	Q96FV9	NM_005131	Hs.712543	adrenal gland| bladder| blood| bone| bone marrow| brain| cervix| connective tissue| ear| embryonic tissue| eye| heart| intestine| kidney| larynx| liver| lung| lymph node| mammary gland| muscle| nerve| ovary| pharynx| placenta| prostate| skin| spleen| stomach| testis| thymus| thyroid| uterus| vascular|adrenal tumor| breast (mammary gland) tumor| chondrosarcoma| gastrointestinal tumor| germ cell tu…	NM_005131	GO:0000018	regulation of DNA recombination	inferred from mutant phenotype	NM_005131	GO:0000346	transcription export complex	inferred from direct assay	NM_005131	GO:0003677	DNA binding	inferred from electronic annotation				ENST00000261600	Pfam	IPR000488	Death domain	5.01572	4.9437	4.4792	4.56854
TC19001348.hg.1	4.35273	4.90928	-1.47075	down	0.00037581	0.0575458	ZNF626	NM_001076675	zinc finger protein 626	protein_coding	chr19	-	NM_001076675	20802745	20844406	198	19p12	199777	NM_001076675	RefSeq	Homo sapiens zinc finger protein 626 (ZNF626), transcript variant 1, mRNA.	NM_001076675	Q68DY1	NM_001076675	Hs.657001	blood| brain| connective tissue| ear| embryonic tissue| eye| intestine| kidney| lung| lymph node| muscle| ovary| parathyroid| prostate| salivary gland| skin| testis| thymus| trachea| uterus| colorectal tumor| germ cell tumor| leukemia| normal| ovarian tumor| retinoblastoma| skin tumor| uterine tumor|embryoid body| fetus| adult	NM_001076675	GO:0006351	transcription, DNA-templated	inferred from electronic annotation	NM_001076675	GO:0005634	nucleus	inferred from electronic annotation	NM_001076675	GO:0003677	DNA binding	inferred from electronic annotation				ENST00000291750	Pfam	IPR001909	Krueppel-associated box	4.43509	4.34207	4.46748	4.16628
TC03001798.hg.1	5.65271	5.31168	1.26666	up	0.000379204	0.0578757	RAB6B	NM_016577	RAB6B, member RAS oncogene family	protein_coding	chr3	-	NM_016577	133543080	133614691	229	3q22.1	51560	NM_016577	RefSeq	Homo sapiens RAB6B, member RAS oncogene family (RAB6B), mRNA.	NM_016577	Q9NRW1	NM_016577	Hs.715344	blood| bone| brain| connective tissue| ear| embryonic tissue| eye| heart| intestine| kidney| liver| lung| mouth| muscle| nerve| ovary| pancreas| parathyroid| placenta| prostate| skin| stomach| testis| uterus| chondrosarcoma| colorectal tumor| gastrointestinal tumor| germ cell tumor| glioma| head and neck tumor| kidney tumor| leukemia| liver tumor| lung tumor| non-neoplasia| normal| ovarian tumor|…	NM_016577	GO:0006184	GTP catabolic process	non-traceable author statement	NM_016577	GO:0000139	Golgi membrane	inferred from electronic annotation	NM_016577	GO:0003924	GTPase activity	non-traceable author statement				ENST00000486858	Pfam	IPR000795	Elongation factor, GTP-binding domain	5.61499	5.59209	5.69538	5.70839
TC01004187.hg.1	5.34746	4.99788	1.27419	up	0.000379679	0.0578757	linc-AADACL4	TCONS_00000154-XLOC_000055		ncRNA	chr1	+		12587486	12588702	40			TCONS_00000154-XLOC_000055	Rinn lincRNA	linc-AADACL4 chr1:+:12587765-12588462																									5.27144	5.33266	5.37845	5.40729
TC14000079.hg.1	3.09927	2.70476	1.31449	up	0.000381839	0.0580021	RP11-998D10.1	ENST00000531638		antisense	chr14	+		21500977	21502054	30			ENST00000531638	ENSEMBL	havana:putative chromosome:GRCh38:14:21032818:21033895:1 gene:ENSG00000255472 gene_biotype:protein_coding transcript_biotype:protein_coding	ENST00000531638	E9PR74																							3.15206	3.19805	2.9549	3.09206
TC06002561.hg.1	4.88259	4.48223	1.31984	up	0.000383315	0.0580021	RP11-556O15.1	OTTHUMT00000039768	putative novel transcript	ncRNA	chr6	+	OTTHUMT00000039768	6938423	6940786	30			OTTHUMT00000039768	NONCODE	accn=NULL class=mRNAlike lncRNA name=vega lncRNA ref=GENCODE transcriptId=OTTHUMT00000039768 cpcScore=0.3573380 cnci=-0.1604770 gene:OTTHUMG00000014196																									4.84061	4.81166	4.95475	4.92335
TC17001882.hg.1	7.83243	8.47207	-1.55793	down	0.000384011	0.0580021	H3F3B	NM_005324	H3 histone, family 3B (H3.3B)	protein_coding	chr17	-	NM_005324	73772515	73775860	89	17q25.1	3021	NM_005324	RefSeq	Homo sapiens H3 histone, family 3B (H3.3B) (H3F3B), mRNA.	NM_005324	P84243	NM_005324	Hs.180877	adipose tissue| adrenal gland| ascites| bladder| blood| bone| bone marrow| brain| cervix| connective tissue| ear| embryonic tissue| esophagus| eye| heart| intestine| kidney| larynx| liver| lung| lymph| lymph node| mammary gland| mouth| muscle| nerve| ovary| pancreas| parathyroid| pharynx| pituitary gland| placenta| prostate| salivary gland| skin| spleen| stomach| testis| thymus| thyroid| tonsil| …	NM_005324	GO:0006336	DNA replication-independent nucleosome assembly	inferred from direct assay	NM_005324	GO:0000228	nuclear chromosome	inferred from direct assay	NM_005324	GO:0000979	RNA polymerase II core promoter sequence-specific DNA binding	inferred from direct assay				ENST00000254810	Pfam	IPR007125	Histone core	7.75733	7.80831	7.89305	7.87105
TC07002075.hg.1	2.23734	1.7901	1.36343	up	0.000386465	0.0580021	RP4-639J15.1	ENST00000426169		ncRNA	chr7	-		156850403	156851208	30			ENST00000426169	ENSEMBL	havana:known chromosome:GRCh38:7:157057709:157058514:-1 gene:ENSG00000236102 gene_biotype:lincRNA transcript_biotype:lincRNA			ENST00000426169	Hs.335010	testis| normal																				2.1878	2.13239	2.48402	2.14513
TC17000774.hg.1	5.90747	5.51297	1.31449	up	0.000386577	0.0580021	PRR29	NM_001164257	proline rich 29	protein_coding	chr17	+	NM_001164257	62075711	62081664	70	17q23.3	92340	NM_001164257	RefSeq	Homo sapiens proline rich 29 (PRR29), transcript variant 2, mRNA.	NM_001164257	P0C7W0	NM_001164257	Hs.708161	brain| cervix| embryonic tissue| heart| intestine| kidney| liver| lung| lymph node| mammary gland| mouth| muscle| ovary| pancreas| placenta| prostate| testis| thyroid| trachea| umbilical cord| uterus| vascular| cervical tumor| germ cell tumor| glioma| head and neck tumor| kidney tumor| leukemia| non-neoplasia| normal| ovarian tumor| pancreatic tumor| primitive neuroectodermal tumor of the CNS| ut…																				5.84807	5.87278	6.00054	5.90851
TC15002568.hg.1	4.56503	4.13803	1.34444	up	0.000388303	0.0580021	linc-C2CD4B-7	TCONS_00023690-XLOC_011492		ncRNA	chr15	-		62466084	62478265	24			TCONS_00023690-XLOC_011492	Rinn lincRNA	linc-C2CD4B-7 chr15:-:62466083-62478265																									4.49568	4.569	4.54193	4.65353
TC01006148.hg.1	3.9894	3.50429	1.39969	up	0.000388464	0.0580021	RP11-145A3.2	OTTHUMT00000092058	novel transcript	ncRNA	chr1	-	OTTHUMT00000092058	223965293	223990599	30			OTTHUMT00000092058	NONCODE	accn=NULL class=mRNAlike lncRNA name=vega lncRNA ref=GENCODE transcriptId=OTTHUMT00000092058 cpcScore=0.5367950 cnci=-0.4150069 gene:OTTHUMG00000037740																									3.88666	4.03106	3.85978	4.18009
TC09001456.hg.1	1.68629	2.4508	-1.6988	down	0.000389127	0.0580021	NCRNA00298	ENST00000443348		other	chr9	-		111633250	111635485	30			ENST00000443348	ENSEMBL	[retired] havana:sense_intronic chromosome:GRCh37:9:111633250:111635485:-1 gene:ENSG00000232755 gene_biotype:sense_intronic transcript_biotype:sense_intronic																									1.95955	1.75905	1.49794	1.5286
TC18000943.hg.1	3.75762	3.34798	1.32836	up	0.000389433	0.0580021	linc-LMAN1-2	TCONS_00026535-XLOC_012858		ncRNA	chr18	-		57059887	57065685	30			TCONS_00026535-XLOC_012858	Rinn lincRNA	linc-LMAN1-2 chr18:-:57059886-57065685																									3.716	3.73895	3.89966	3.67588
TC08000351.hg.1	2.71149	2.20101	1.42452	up	0.000389515	0.0580021	LOC101929217	ENST00000521660	uncharacterized LOC101929217	ncRNA	chr8	+	ENST00000521660	49533025	49536455	30		101929217	ENST00000521660	ENSEMBL	havana:known chromosome:GRCh38:8:48620465:48623895:1 gene:ENSG00000253455 gene_biotype:lincRNA transcript_biotype:lincRNA			ENST00000521660	Hs.547790	testis| normal| fetus																				2.53997	2.74187	2.76753	2.79659
TC21000528.hg.1	5.93823	5.47731	1.37642	up	0.000389956	0.0580021	KRTAP10-2	NM_198693	keratin associated protein 10-2	protein_coding	chr21	-	NM_198693	45970240	45971388	50	21q22.3	386679	NM_198693	RefSeq	Homo sapiens keratin associated protein 10-2 (KRTAP10-2), mRNA.	NM_198693	P60368	NM_198693	Hs.664660						NM_198693	GO:0045095	keratin filament	inferred from electronic annotation												5.85618	5.92013	6.01034	5.96626
TC05001601.hg.1	3.30044	3.80544	-1.41912	down	0.00039263	0.0582715	KIAA0825	NM_001145678	KIAA0825	protein_coding	chr5	-	NM_001145678	93486556	93954309	302	5q15	285600	NM_001145678	RefSeq	Homo sapiens KIAA0825 (KIAA0825), transcript variant 1, mRNA.	NM_001145678	Q8IV33	NM_001145678	Hs.425123	blood| bone| brain| cervix| connective tissue| eye| kidney| liver| mammary gland| ovary| placenta| testis| thyroid| vascular| breast (mammary gland) tumor| cervical tumor| head and neck tumor| kidney tumor| leukemia| liver tumor| normal| soft tissue/muscle tissue tumor| fetus| adult																				3.46541	3.37904	3.2755	3.08181
TC08001422.hg.1	1.80243	2.60961	-1.74978	down	0.000393592	0.0582861	OTTHUMT00000377518	OTTHUMT00000377518	cdna:all chromosome:VEGA56:8:92875221:92879502:-1 Gene:OTTHUMG00000164159	unknown	chr8	-		93887449	93891730	30			OTTHUMT00000377518	Havana transcript	cdna:all chromosome:VEGA56:8:92875221:92879502:-1 Gene:OTTHUMG00000164159																									2.19384	1.89346	1.50624	1.6162
TC01004130.hg.1	5.4406	5.14863	1.22431	up	0.000394706	0.0583231	LOC148413	ENST00000418833	uncharacterized LOC148413	ncRNA	chr1	+	ENST00000418833	1334902	1337426	90	1p36.33	148413	ENST00000418833	NONCODE	accn=NULL class=lncRNA name= ref=EnsemblNoncode transcriptId=ENST00000418833 cpcScore=-0.8409940 cnci=-0.0971986 gene:ENSG00000224870	ENST00000418833	B4DNA4	ENST00000418833	Hs.741357	ascites| blood| bone| bone marrow| brain| cervix| connective tissue| embryonic tissue| esophagus| eye| heart| intestine| kidney| liver| lung| lymph| lymph node| mammary gland| mouth| muscle| ovary| pancreas| pharynx| placenta| prostate| salivary gland| skin| spleen| testis| thymus| umbilical cord| uterus| vascular| bladder carcinoma| breast (mammary gland) tumor| cervical tumor| chondrosarcoma| c…																				5.45017	5.45837	5.43756	5.41632
TC09000784.hg.1	5.45639	4.9636	1.40716	up	0.000395658	0.0583363	RP11-473E2.3	OTTHUMT00000054946	putative novel transcript	ncRNA	chr9	+	OTTHUMT00000054946	137444584	137445743	30			OTTHUMT00000054946	Havana transcript	cdna:all chromosome:VEGA56:9:134552738:134553897:1 Gene:OTTHUMG00000020885																									5.38773	5.43844	5.49612	5.50326
TC12000314.hg.1	2.45868	2.1072	1.27586	up	0.000397831	0.0584278	RNA5SP360	ENST00000516555	RNA, 5S ribosomal pseudogene 360	rRNA	chr12	+	ENST00000516555	42052478	42052595	30			ENST00000516555	ENSEMBL	ncrna:known chromosome:GRCh38:12:41658676:41658793:1 gene:ENSG00000252364 gene_biotype:rRNA transcript_biotype:rRNA																									2.37622	2.53619	2.43595	2.48635
TC11000527.hg.1	4.3563	3.86482	1.40588	up	0.000398183	0.0584278	PGA3	NM_001079807	pepsinogen 3, group I (pepsinogen A)	protein_coding	chr11	+	NM_001079807	60970852	60980570	170	11q12.2	643834	NM_001079807	RefSeq	Homo sapiens pepsinogen 3, group I (pepsinogen A) (PGA3), mRNA.	NM_001079807	P0DJD8	NM_001079807	Hs.601055	brain| esophagus| eye| mammary gland| nerve| pituitary gland| placenta| skin| stomach| testis| breast (mammary gland) tumor| gastrointestinal tumor| glioma| non-neoplasia| normal| fetus| adult	NM_001079807	GO:0006508	proteolysis	inferred from electronic annotation	NM_001079807	GO:0005576	extracellular region	inferred from electronic annotation	NM_001079807	GO:0004190	aspartic-type endopeptidase activity	inferred from electronic annotation				ENST00000325558	Pfam	IPR001461	Aspartic peptidase	4.34904	4.62583	4.32738	4.12296
TC12002901.hg.1	3.76346	3.04538	1.64499	up	0.00039897	0.0584278	ENST00000551732	ENST00000551732		ncRNA	chr12	-		54555849	54558236	26			ENST00000551732	NONCODE	accn=NULL class=lncRNA name= ref=EnsemblNoncode transcriptId=ENST00000551732 cpcScore=-0.9619660 cnci=-0.1753726 gene:ENSG00000257534																									3.61979	3.44853	3.93137	4.05415
TC10001159.hg.1	5.04156	5.55881	-1.43122	down	0.00039974	0.0584278	ARHGAP12	NM_018287	Rho GTPase activating protein 12	protein_coding	chr10	-	NM_018287	32094365	32217770	334	10p11.22	94134	NM_018287	RefSeq	Homo sapiens Rho GTPase activating protein 12 (ARHGAP12), transcript variant 1, mRNA.	NM_018287	Q8IWW6	NM_018287	Hs.499264	adipose tissue| adrenal gland| ascites| blood| bone| brain| connective tissue| ear| embryonic tissue| eye| heart| intestine| kidney| liver| lung| lymph node| mammary gland| mouth| nerve| pancreas| parathyroid| placenta| prostate| skin| spleen| stomach| testis| thymus| thyroid| trachea| uterus|adrenal tumor| breast (mammary gland) tumor| chondrosarcoma| colorectal tumor| gastrointestinal tumor| gl…	NM_018287	GO:0002011	morphogenesis of an epithelial sheet	inferred from mutant phenotype	NM_018287	GO:0005829	cytosol	traceable author statement	NM_018287	GO:0005096	GTPase activator activity	inferred from electronic annotation				ENST00000311380	Pfam	IPR000198	Rho GTPase-activating protein domain	5.07535	5.05237	4.85964	5.17888
TC17000031.hg.1	3.77528	3.30488	1.3855	up	0.000402137	0.0584906	OR3A4P	NR_024128	olfactory receptor, family 3, subfamily A, member 4 pseudogene	pseudogene	chr17	+	NR_024128	3213539	3214740	30	17p13.3	390756	NR_024128	RefSeq	Homo sapiens olfactory receptor, family 3, subfamily A, member 4 pseudogene (OR3A4P), non-coding RNA.	NR_024128	P47883	NR_024128	Hs.632245		NR_024128	GO:0007165	signal transduction	inferred from electronic annotation	NR_024128	GO:0005886	plasma membrane	inferred from electronic annotation	NR_024128	GO:0004871	signal transducer activity	inferred from electronic annotation								3.68896	3.68511	3.91935	3.80768
TC05000024.hg.1	5.10766	5.78284	-1.5968	down	0.000403895	0.0584906	RP11-259O2.3	OTTHUMT00000365494	putative novel transcript	ncRNA	chr5	+	OTTHUMT00000365494	1968208	1969127	30			OTTHUMT00000365494	Havana transcript	cdna:all chromosome:VEGA56:5:1968094:1969013:1 Gene:OTTHUMG00000161603																									5.37719	5.27267	4.95493	4.82586
TC07002371.hg.1	4.62628	5.15381	-1.44146	down	0.000404119	0.0584906	ZNF273	NR_003099	zinc finger protein 273	protein_coding	chr7	+	NR_003099	64363620	64391955	50	7q11.21	10793	NR_003099	NONCODE	accn=NR_003099 class=lncRNA name= ref=RefGeneNoncode transcriptId=NR_003099 cpcScore=7.6274800 cnci=-0.2633420	NR_003099	Q14593	NR_003099	Hs.520889	bladder| bone| bone marrow| brain| connective tissue| ear| embryonic tissue| eye| intestine| liver| lung| mammary gland| mouth| muscle| ovary| pituitary gland| placenta| prostate| salivary gland| skin| testis| thymus| uterus| bladder carcinoma| chondrosarcoma| germ cell tumor| glioma| leukemia| non-neoplasia| normal| ovarian tumor| primitive neuroectodermal tumor of the CNS| retinoblastoma| skin …	NR_003099	GO:0006351	transcription, DNA-templated	inferred from electronic annotation	NR_003099	GO:0005634	nucleus	inferred from electronic annotation	NR_003099	GO:0003677	DNA binding	inferred from electronic annotation								4.82113	4.62575	4.54099	4.51727
TC02000962.hg.1	4.82006	4.42213	1.31761	up	0.000404344	0.0584906	AC005042.5	OTTHUMT00000333268	putative novel transcript	ncRNA	chr2	+	OTTHUMT00000333268	159542415	159610287	30			OTTHUMT00000333268	Havana transcript	cdna:all chromosome:VEGA56:2:158685903:158753775:1 Gene:OTTHUMG00000153971																									4.79584	4.95851	4.69586	4.83002
TC04001417.hg.1	4.76703	5.43028	-1.58365	down	0.000404706	0.0584906	DNAJB14	NM_001031723	DnaJ (Hsp40) homolog, subfamily B, member 14	protein_coding	chr4	-	NM_001031723	100817405	100867883	281	4q23	79982	NM_001031723	RefSeq	Homo sapiens DnaJ (Hsp40) homolog, subfamily B, member 14 (DNAJB14), transcript variant 1, mRNA.	NM_001031723	Q8TBM8	NM_001031723	Hs.577426	adipose tissue| adrenal gland| ascites| blood| brain| connective tissue| embryonic tissue| eye| intestine| kidney| liver| lung| lymph node| mammary gland| mouth| muscle| pancreas| pharynx| pituitary gland| placenta| prostate| skin| spleen| stomach| testis| thymus| trachea| uterus| breast (mammary gland) tumor| chondrosarcoma| colorectal tumor| gastrointestinal tumor| germ cell tumor| head and nec…					NM_001031723	GO:0016021	integral component of membrane	inferred from electronic annotation								ENST00000442697	Pfam	IPR001623	DnaJ domain	4.78582	4.73421	4.76345	4.78462
TC12000273.hg.1	4.18635	3.24953	1.9143	up	0.000405367	0.0584906	RP11-993B23.3	ENST00000538113		antisense	chr12	+		28111450	28122746	30			ENST00000538113	ENSEMBL	havana:known chromosome:GRCh38:12:27958517:27969813:1 gene:ENSG00000257042 gene_biotype:antisense transcript_biotype:antisense			ENST00000538113	Hs.89626	connective tissue| lung| lung tumor| normal| soft tissue/muscle tissue tumor| fetus| adult																				4.22065	3.72638	4.5782	4.22017
TC07003235.hg.1	3.9588	3.49381	1.38031	up	0.000411092	0.0591903	ENST00000515382	ENST00000515382		ncRNA	chr7	-		150004701	150010334	30			ENST00000515382	NONCODE	accn=NULL class=lncRNA name= ref=EnsemblNoncode transcriptId=ENST00000515382 cpcScore=-0.9934010 cnci=-0.3095048																									3.98665	4.08572	3.87294	3.8899
TC14001443.hg.1	10.0676	9.34783	1.64688	up	0.000413258	0.0593755	FBLN5	NM_006329	fibulin 5	protein_coding	chr14	-	NM_006329	92335755	92414167	182	14q32.1	10516	NM_006329	RefSeq	Homo sapiens fibulin 5 (FBLN5), mRNA.	NM_006329	Q9UBX5	NM_006329	Hs.332708	adipose tissue| adrenal gland| bladder| bone| brain| cervix| connective tissue| ear| embryonic tissue| eye| heart| intestine| kidney| liver| lung| lymph node| mammary gland| mouth| muscle| nerve| ovary| pancreas| pharynx| placenta| prostate| skin| spleen| stomach| testis| thymus| thyroid| trachea| umbilical cord| uterus| vascular|adrenal tumor| cervical tumor| chondrosarcoma| colorectal tumor| ga…	NM_006329	GO:0001558	regulation of cell growth	inferred from electronic annotation	NM_006329	GO:0005576	extracellular region	traceable author statement	NM_006329	GO:0005178	integrin binding	traceable author statement				ENST00000342058	Pfam	IPR001881	EGF-like calcium-binding domain	10.1114	10.0175	9.91887	10.2225
TC09001790.hg.1	4.53401	4.05174	1.39694	up	0.000415034	0.059504	linc-SMARCA2-2	TCONS_00016530-XLOC_007264		ncRNA	chr9	+		1633518	1929562	20			TCONS_00016530-XLOC_007264	Rinn lincRNA	linc-SMARCA2-2 chr9:+:1633517-1929562																									4.75402	4.48838	4.54816	4.34546
TC15002009.hg.1	5.09557	4.64322	1.36827	up	0.000416676	0.0595837	PCSK6	NM_002570	proprotein convertase subtilisin/kexin type 6	protein_coding	chr15	-	NM_002570	101844133	102030187	330	15q26.3	5046	NM_002570	RefSeq	Homo sapiens proprotein convertase subtilisin/kexin type 6 (PCSK6), transcript variant 1, mRNA.	NM_002570	P29122	NM_002570	Hs.498494	blood| brain| cervix| connective tissue| embryonic tissue| eye| intestine| kidney| liver| lung| mammary gland| muscle| pancreas| placenta| spleen| testis| thymus| uterus| breast (mammary gland) tumor| cervical tumor| chondrosarcoma| colorectal tumor| gastrointestinal tumor| germ cell tumor| leukemia| liver tumor| non-neoplasia| normal| primitive neuroectodermal tumor of the CNS| soft tissue/muscl…	NM_002570	GO:0006508	proteolysis	inferred from electronic annotation	NM_002570	GO:0005615	extracellular space	inferred from direct assay	NM_002570	GO:0004175	endopeptidase activity	inferred from direct assay				ENST00000331826	Pfam	IPR000209	Peptidase S8/S53 domain	5.04653	5.15876	4.98435	5.19264
TC08001030.hg.1	5.73993	5.04173	1.62247	up	0.000420678	0.0595837	GFRA2	NM_001165038	GDNF family receptor alpha 2	protein_coding	chr8	-	NM_001165038	21547915	21669869	262	8p21.3	2675	NM_001165038	RefSeq	Homo sapiens GDNF family receptor alpha 2 (GFRA2), transcript variant 2, mRNA.	NM_001165038	O00451	NM_001165038	Hs.441202	bone| brain| connective tissue| embryonic tissue| eye| heart| intestine| kidney| muscle| ovary| placenta| prostate| testis| chondrosarcoma| glioma| normal| ovarian tumor| primitive neuroectodermal tumor of the CNS| soft tissue/muscle tissue tumor| fetus| infant| adult	NM_001165038	GO:0007169	transmembrane receptor protein tyrosine kinase signaling pathway	traceable author statement	NM_001165038	GO:0005886	plasma membrane	inferred from electronic annotation	NM_001165038	GO:0016167	glial cell-derived neurotrophic factor receptor activity	inferred from electronic annotation				ENST00000517328	Pfam	IPR016017	GDNF/GAS1	5.38342	5.851	5.89589	5.82939
TC12002046.hg.1	5.7461	5.34718	1.31852	up	0.000420932	0.0595837	DYNLL1-AS1	NR_038854	DYNLL1 antisense RNA 1	ncRNA	chr12	-	NR_038854	120928131	120933749	30		100506668	NR_038854	RefSeq	Homo sapiens DYNLL1 antisense RNA 1 (DYNLL1-AS1), long non-coding RNA.			NR_038854	Hs.660080	blood| bone| brain| connective tissue| embryonic tissue| eye| intestine| kidney| liver| lung| lymph node| mouth| ovary| pancreas| pharynx| placenta| prostate| stomach| testis| trachea| uterus| vascular| chondrosarcoma| colorectal tumor| gastrointestinal tumor| glioma| head and neck tumor| leukemia| lung tumor| non-neoplasia| normal| ovarian tumor| pancreatic tumor| soft tissue/muscle tissue tumor…																				5.77989	5.62655	5.69927	5.8787
TC06003618.hg.1	5.05686	4.56774	1.40359	up	0.000421027	0.0595837	CLPS	AY780649	colipase, pancreatic	protein_coding	chr6	-	AY780649	35762887	35765057	30	6p21.31	1208	AY780649	NONCODE	accn=AY780649 class=mRNAlike lncRNA name=NULL ref=H-invitational v7.5 transcriptId=HIT000257687 cpcScore=0.4299140 cnci=-0.0888535	AY780649	Q5U808	AY780649	Hs.1340	bladder| blood| brain| liver| ovary| pancreas| spleen| testis| lymphoma| normal| ovarian tumor| pancreatic tumor| primitive neuroectodermal tumor of the CNS| fetus| adult	AY780649	GO:0001523	retinoid metabolic process	traceable author statement	AY780649	GO:0005576	extracellular region	traceable author statement	AY780649	GO:0008047	enzyme activator activity	inferred from electronic annotation								4.91985	5.041	5.16077	5.10581
TC02001672.hg.1	5.97258	5.55937	1.33164	up	0.000421703	0.0595837	AGBL5-AS1	ENST00000444217	AGBL5 antisense RNA 1	antisense	chr2	-	ENST00000444217	27272551	27273132	30	2p23.3	100874031	ENST00000444217	ENSEMBL	havana:known chromosome:GRCh38:2:27049683:27050264:-1 gene:ENSG00000231636 gene_biotype:antisense transcript_biotype:antisense																									5.97376	6.01773	5.97315	5.92569
TC05002751.hg.1	3.4929	2.9692	1.43763	up	0.000422381	0.0595837	linc-MSX2-2	TCONS_l2_00022637-XLOC_l2_011854		ncRNA	chr5	+		173763174	173959574	234			TCONS_l2_00022637-XLOC_l2_011854	Broad TUCP	linc-MSX2-2 chr5:+:173763173-173786733																									3.81252	3.49042	3.35983	3.30882
TC01006237.hg.1	4.54141	5.14703	-1.52163	down	0.000422517	0.0595837	linc-PLD5-4	TCONS_l2_00002811-XLOC_l2_001398		ncRNA	chr1	-		243192814	243215554	72			TCONS_l2_00002811-XLOC_l2_001398	Broad TUCP	linc-PLD5-4 chr1:-:243192813-243211127																									4.6706	4.55874	4.47608	4.46021
TC21001034.hg.1	6.2062	5.76621	1.35659	up	0.000423536	0.0595837	KRTAP10-2	AB076349	keratin associated protein 10-2	protein_coding	chr21	-	AB076349	45970319	45971388	30	21q22.3	386679	AB076349	NONCODE	accn=AB076349 class=mRNAlike lncRNA name=NULL ref=H-invitational v7.5 transcriptId=HIT000242038 cpcScore=1.7109200 cnci=-0.0264359	AB076349	Q76LM9	AB076349	Hs.664660						AB076349	GO:0045095	keratin filament	inferred from electronic annotation												6.29789	6.23931	6.23248	6.05511
TC17002818.hg.1	4.01605	3.43857	1.49224	up	0.00042576	0.0595837	LOC101928855	AK123620	uncharacterized LOC101928855	ncRNA	chr17	-	AK123620	78775440	78779432	40	17q25.3	101928855	AK123620	NONCODE	accn=AK123620 class=mRNAlike lncRNA name=Human lncRNA ref=JounralRNA transcriptId=3382 cpcScore=-0.0479846 cnci=-0.1704565			AK123620	Hs.670692	kidney| liver| skin| thyroid| normal| neonate| adult																				4.04281	3.99879	3.97468	4.04793
TC11002850.hg.1	4.39683	5.16968	-1.70864	down	0.000425799	0.0595837	DYNC2H1	AK125524	dynein, cytoplasmic 2, heavy chain 1	protein_coding	chr11	+	AK125524	102980160	103024200	220	11q21-q22.1	79659	AK125524	NONCODE	accn=AK125524 class=mRNAlike lncRNA name=Human lncRNA ref=JounralRNA transcriptId=3572 cpcScore=12.6542000 cnci=-0.1558765	AK125524	Q8NCM8	AK125524	Hs.503721	adipose tissue| adrenal gland| bone| brain| connective tissue| embryonic tissue| eye| heart| intestine| kidney| larynx| liver| lung| mammary gland| muscle| pancreas| placenta| prostate| skin| stomach| testis| uterus| breast (mammary gland) tumor| chondrosarcoma| colorectal tumor| gastrointestinal tumor| germ cell tumor| head and neck tumor| kidney tumor| liver tumor| non-neoplasia| normal| ovaria…	AK125524	GO:0006200	ATP catabolic process	inferred from electronic annotation	AK125524	GO:0005794	Golgi apparatus	inferred from direct assay	AK125524	GO:0003774	motor activity	non-traceable author statement								4.58135	4.4867	4.34838	4.17091
TC01005815.hg.1	3.87403	5.08031	-2.30742	down	0.000427962	0.0595837	linc_luo_1013	linc_luo_1013		ncRNA	chr1	-		150537097	150545329	99			linc_luo_1013	NONCODE	accn=NULL class=lincRNA name=Human lincRNA ref=Scripture Reconstruction LincRNAs By Luo transcriptId=linc_luo_1013 cpcScore=-1.2617700 cnci=-0.2868423																									4.22369	4.13445	3.60486	3.53311
TC01005061.hg.1	4.28478	3.79335	1.40583	up	0.000428495	0.0595837	uc001hor.1	uc001hor.1		ncRNA	chr1	+		224622614	224709674	30			uc001hor.1	NONCODE	accn=NULL class=lncRNA name= ref=UCSCGeneNoncode transcriptId=uc001hor.1 cpcScore=-1.1840000 cnci=-0.2407793																									4.2849	4.15172	4.2822	4.42029
TC01003384.hg.1	4.65784	4.23317	1.34227	up	0.000428739	0.0595837	trnA	trnA	gi|7525012|ref|NC_000932.1|103665:104538:1 product=tRNA-Ala, Chloroplast [Arabidopsis thaliana]	other	chr1	-		159111401	159111474	30			trnA	GenBank	gi|7525012|ref|NC_000932.1|103665:104538:1 product=tRNA-Ala, Chloroplast [Arabidopsis thaliana]																									4.61791	4.62294	4.81512	4.57541
TC12000761.hg.1	5.47177	5.85332	-1.30274	down	0.000429545	0.0595837	TMPO	NM_001032283	thymopoietin	protein_coding	chr12	+	NM_001032283	98909290	98944157	225	12q22	7112	NM_001032283	RefSeq	Homo sapiens thymopoietin (TMPO), transcript variant 2, mRNA.	NM_001032283	P42166	NM_001032283	Hs.11355	adrenal gland| ascites| bladder| blood| bone| bone marrow| brain| cervix| connective tissue| ear| embryonic tissue| esophagus| eye| heart| intestine| kidney| liver| lung| lymph| lymph node| mammary gland| mouth| muscle| ovary| pancreas| placenta| prostate| salivary gland| skin| spleen| stomach| testis| thymus| thyroid| trachea| uterus| vascular|adrenal tumor| bladder carcinoma| breast (mammary gl…	NM_001032283	GO:0006355	regulation of transcription, DNA-templated	inferred from electronic annotation	NM_001032283	GO:0000785	chromatin	inferred from direct assay	NM_001032283	GO:0003677	DNA binding	inferred from electronic annotation				ENST00000261210	Pfam	IPR003887	LEM domain	5.47267	5.65135	5.37712	5.38593
TC09002308.hg.1	6.35531	5.90303	1.36821	up	0.000429786	0.0595837	linc-NTNG2-2	TCONS_l2_00029094-XLOC_l2_015046		ncRNA	chr9	+		134430077	134433446	30			TCONS_l2_00029094-XLOC_l2_015046	Broad TUCP	linc-NTNG2-2 chr9:+:134430076-134433446																									6.2492	6.34188	6.46226	6.36791
TC06002012.hg.1	4.18601	3.76315	1.34058	up	0.000429994	0.0595837	CDK19	BC047513	cyclin-dependent kinase 19	protein_coding	chr6	-	BC047513	111133328	111136191	30	6q21	23097	BC047513	GenBank	Homo sapiens cell division cycle 2-like 6 (CDK8-like), mRNA (cDNA clone IMAGE:5295101).	BC047513	Q9BWU1	BC047513	Hs.744895	bone| brain| connective tissue| ear| embryonic tissue| esophagus| eye| heart| intestine| kidney| liver| lung| lymph| lymph node| mammary gland| muscle| nerve| ovary| pancreas| placenta| prostate| skin| stomach| testis| thymus| trachea| uterus| breast (mammary gland) tumor| chondrosarcoma| colorectal tumor| esophageal tumor| gastrointestinal tumor| germ cell tumor| lymphoma| non-neoplasia| normal|…	BC047513	GO:0006468	protein phosphorylation	inferred from electronic annotation					BC047513	GO:0004693	cyclin-dependent protein serine/threonine kinase activity	inferred from electronic annotation								4.2486	4.24204	4.12326	4.13016
TC16001390.hg.1	4.37372	3.99308	1.30192	up	0.000430982	0.0595837	PAQR4	AF086057	progestin and adipoQ receptor family member IV	protein_coding	chr16	+	AF086057	3023250	3023493	30	16p13.3	124222	AF086057	NONCODE	accn=AF086057 class=mRNAlike lncRNA name=NULL ref=H-invitational v7.5 transcriptId=HIT000066936 cpcScore=-0.8383500 cnci=-0.1857887	AF086057	Q8N4S7	AF086057	Hs.351474	adrenal gland| ascites| blood| bone| brain| cervix| connective tissue| embryonic tissue| esophagus| eye| heart| intestine| kidney| larynx| liver| lung| lymph| lymph node| mammary gland| mouth| muscle| nerve| ovary| pancreas| placenta| prostate| skin| stomach| testis| thymus| thyroid| uterus| vascular| breast (mammary gland) tumor| cervical tumor| chondrosarcoma| colorectal tumor| esophageal tumor…					AF086057	GO:0016021	integral component of membrane	inferred from electronic annotation	AF086057	GO:0004872	receptor activity	not recorded								4.3737	4.39194	4.41565	4.3136
TC05002790.hg.1	3.73131	4.19057	-1.37484	down	0.000431471	0.0595837	linc-OR4F16-1	TCONS_00009572-XLOC_004689		ncRNA	chr5	+		180777137	180792134	29			TCONS_00009572-XLOC_004689	Rinn lincRNA	linc-OR4F16-1 chr5:+:180777136-180792134																									3.82255	3.71601	3.66426	3.72242
TC08001071.hg.1	6.23783	6.96366	-1.65385	down	0.00043569	0.0600434	KCTD9	NM_017634	potassium channel tetramerization domain containing 9	protein_coding	chr8	-	NM_017634	25285364	25315992	284	8p21.1	54793	NM_017634	RefSeq	Homo sapiens potassium channel tetramerization domain containing 9 (KCTD9), mRNA.	NM_017634	Q7L273	NM_017634	Hs.72071	adrenal gland| ascites| bladder| blood| bone| bone marrow| brain| cervix| connective tissue| embryonic tissue| esophagus| eye| intestine| kidney| liver| lung| lymph node| mammary gland| muscle| nerve| ovary| pancreas| pituitary gland| placenta| prostate| salivary gland| skin| spleen| stomach| testis| trachea| uterus| vascular|adrenal tumor| bladder carcinoma| breast (mammary gland) tumor| cervica…	NM_017634	GO:0051260	protein homooligomerization	inferred from electronic annotation					ENST00000221200	GO:0005515	protein binding	inferred from electronic annotation				ENST00000221200	Pfam	IPR001646	Pentapeptide repeat	6.1672	6.19724	6.37383	6.21307
TC12000719.hg.1	2.62192	3.39907	-1.71374	down	0.000437613	0.0601856	AC138123.1	ENST00000408690		miRNA	chr12	+		93491027	93491120	30			ENST00000408690	ENSEMBL	ncrna:novel chromosome:GRCh38:12:93097251:93097344:1 gene:ENSG00000221617 gene_biotype:miRNA transcript_biotype:miRNA																									2.92528	2.68534	2.50498	2.3721
TC09000265.hg.1	4.21751	5.535	-2.49231	down	0.000440085	0.0603782	RP11-187C18.2	OTTHUMT00000037018	putative novel transcript	other	chr9	+	OTTHUMT00000037018	45484572	45488153	30			OTTHUMT00000037018	Havana transcript	[retired]cdna:all chromosome:VEGA52:9:45484572:45488153:1 Gene:OTTHUMG00000013250																									4.77883	4.27664	4.23676	3.57783
TC10000944.hg.1	4.36644	3.99442	1.29417	up	0.000441116	0.0603782	RP11-432J24.2	OTTHUMT00000051076	putative novel transcript	ncRNA	chr10	+	OTTHUMT00000051076	134232587	134234457	30			OTTHUMT00000051076	Havana transcript	cdna:all chromosome:VEGA56:10:132419083:132420953:1 Gene:OTTHUMG00000019287			ENST00000428814	Hs.735285																					4.33705	4.42076	4.2151	4.49287
TC11000056.hg.1	4.56429	4.1576	1.32564	up	0.000441696	0.0603782	AK126380	AK126380	Homo sapiens cDNA FLJ44416 fis, clone UTERU2000649.	other	chr11	+		1994989	1999674	30			AK126380	GenBank	Homo sapiens cDNA FLJ44416 fis, clone UTERU2000649.																									4.48877	4.61169	4.46602	4.69068
TC16001833.hg.1	5.86065	5.55756	1.23379	up	0.000444172	0.0605941	LOC388242	NR_002556	coiled-coil domain containing 101 pseudogene	pseudogene	chr16	-	NR_002556	29476289	29478899	50	16p11.2	388242	NR_002556	NONCODE	accn=NR_002556 class=lncRNA name= ref=RefGeneNoncode transcriptId=NR_002556 cpcScore=1.9880300 cnci=-0.0755694			NR_002556	Hs.662549	bone| brain| kidney| lymph node| prostate| testis| uterus| chondrosarcoma| glioma| normal| uterine tumor| fetus| adult																				5.83692	5.87906	5.93411	5.79253
TC20001015.hg.1	4.32837	3.90642	1.33973	up	0.000446149	0.0606024	SLCO4A1-AS1	NR_024470	SLCO4A1 antisense RNA 1	antisense	chr20	-	NR_024470	61294371	61298076	60	20q13.33	100127888	NR_024470	RefSeq	Homo sapiens SLCO4A1 antisense RNA 1 (SLCO4A1-AS1), long non-coding RNA.	NR_024470	Q8TB00	NR_024470	Hs.671273	brain| eye| intestine| liver| mammary gland| skin| breast (mammary gland) tumor| colorectal tumor| glioma| liver tumor| normal| skin tumor| adult																				4.17763	4.36185	4.36211	4.41188
TC16001831.hg.1	4.66235	4.20581	1.37225	up	0.000448462	0.0606024	BC023258	BC023258		ncRNA	chr16	-		29267365	29268945	30			BC023258	NONCODE	accn=BC023258 class=mRNAlike lncRNA name=Human lncRNA ref=JounralRNA transcriptId=4964 cpcScore=-0.8045420 cnci=-0.1450517			BC023258	Hs.638964																					4.66352	4.64575	4.67445	4.66568
TC08000166.hg.1	4.69889	4.36068	1.26418	up	0.000450694	0.0606024	SFTPC	NM_001172357	surfactant protein C	protein_coding	chr8	+	NM_001172357	22014426	22021992	214	8p21	6440	NM_001172357	RefSeq	Homo sapiens surfactant protein C (SFTPC), transcript variant 3, mRNA.	NM_001172357	P11686	NM_001172357	Hs.1074	brain| connective tissue| eye| heart| intestine| kidney| lung| nerve| ovary| pharynx| testis| chondrosarcoma| colorectal tumor| germ cell tumor| lung tumor| non-neoplasia| normal| ovarian tumor| fetus| juvenile| adult	NM_001172357	GO:0007585	respiratory gaseous exchange	inferred from electronic annotation	NM_001172357	GO:0005615	extracellular space	inferred from electronic annotation	NM_001172357	GO:0005515	protein binding	inferred from physical interaction				ENST00000437090	Pfam	IPR007084	BRICHOS domain	4.62569	4.71304	4.79552	4.66132
TC01002183.hg.1	3.49	2.99102	1.41322	up	0.000451597	0.0606024	RP13-392I16.1	OTTHUMT00000003726	novel transcript	ncRNA	chr1	-	OTTHUMT00000003726	9561151	9563530	30			OTTHUMT00000003726	Havana transcript	cdna:all chromosome:VEGA56:1:9501092:9503471:-1 Gene:OTTHUMG00000001278			ENST00000441033	Hs.576292	skin| normal																				3.6565	3.29693	3.39083	3.61574
TC05000431.hg.1	5.81938	6.38981	-1.48497	down	0.000452214	0.0606024	RASA1	NM_002890	RAS p21 protein activator (GTPase activating protein) 1	protein_coding	chr5	+	NM_002890	86563705	86688145	347	5q13.3	5921	NM_002890	RefSeq	Homo sapiens RAS p21 protein activator (GTPase activating protein) 1 (RASA1), transcript variant 1, mRNA.	NM_002890	P20936	NM_002890	Hs.664080	adipose tissue| adrenal gland| ascites| bladder| blood| bone| bone marrow| brain| cervix| connective tissue| ear| embryonic tissue| esophagus| eye| heart| intestine| kidney| liver| lung| lymph| lymph node| mammary gland| mouth| muscle| nerve| ovary| pancreas| parathyroid| pituitary gland| placenta| prostate| skin| spleen| stomach| testis| thymus| thyroid| trachea| uterus| vascular| breast (mammar…					NM_002890	GO:0001726	ruffle	inferred from electronic annotation	NM_002890	GO:0001948	glycoprotein binding	inferred from physical interaction				ENST00000274376	Pfam	IPR000008	C2 domain	5.82012	5.92151	5.75231	5.78357
TC04001540.hg.1	3.97336	4.41303	-1.3563	down	0.000452791	0.0606024	SCLT1	NM_144643	sodium channel and clathrin linker 1	protein_coding	chr4	-	NM_144643	129786076	130014764	389	4q28.2	132320	NM_144643	RefSeq	Homo sapiens sodium channel and clathrin linker 1 (SCLT1), mRNA.	NM_144643	Q96NL6	NM_144643	Hs.654690	ascites| bladder| blood| brain| connective tissue| ear| embryonic tissue| eye| intestine| kidney| liver| lung| lymph| muscle| ovary| pharynx| placenta| prostate| skin| stomach| testis| uterus| vascular| colorectal tumor| gastrointestinal tumor| germ cell tumor| kidney tumor| leukemia| lymphoma| normal| ovarian tumor| primitive neuroectodermal tumor of the CNS| skin tumor| soft tissue/muscle tissu…	NM_144643	GO:0042384	cilium assembly	inferred from mutant phenotype	NM_144643	GO:0005737	cytoplasm	inferred from direct assay	NM_144643	GO:0008022	protein C-terminus binding	inferred from electronic annotation								3.9984	3.92152	3.94362	4.02988
TC09002333.hg.1	5.09915	4.6119	1.40177	up	0.000452915	0.0606024	linc-COL5A1-3	TCONS_00015770-XLOC_007600		ncRNA	chr9	+		137444584	137445743	30			TCONS_00015770-XLOC_007600	Rinn lincRNA	linc-COL5A1-3 chr9:+:137444583-137445743																									5.08242	4.90785	5.24948	5.15685
TC19000006.hg.1	6.22568	5.67439	1.4654	up	0.000452981	0.0606024	Mir_324	uc021ulw.1		other	chr19	+		507882	507966	30			uc021ulw.1	UCSC Genes	Rfam model RF01063 hit found at contig region AC005775.1/43761-43845																									5.96556	6.23219	6.39641	6.30859
TC09000804.hg.1	6.53031	5.80568	1.65248	up	0.000455174	0.0606024	SOHLH1	BC101937	spermatogenesis and oogenesis specific basic helix-loop-helix 1	protein_coding	chr9	+	BC101937	138585383	138585490	30	9q34.3	402381	BC101937	GenBank	Homo sapiens cDNA clone IMAGE:40010150.	BC101937	Q5JUK2	BC101937	Hs.120464	brain| testis| normal	BC101937	GO:0001541	ovarian follicle development	inferred from electronic annotation	BC101937	GO:0005634	nucleus	inferred from electronic annotation	BC101937	GO:0003677	DNA binding	inferred from electronic annotation								6.37587	6.54193	6.60125	6.60219
TC01004986.hg.1	3.21181	2.76874	1.35949	up	0.000455332	0.0606024	linc-CR2-1	TCONS_00001253-XLOC_000541		ncRNA	chr1	+		207589903	207597521	30			TCONS_00001253-XLOC_000541	Rinn lincRNA	linc-CR2-1 chr1:+:207589902-207597521																									3.09604	3.10764	3.24907	3.39449
TC19001675.hg.1	2.44332	3.08219	-1.55711	down	0.000457564	0.0606024	AC010458.1	ENST00000408668		miRNA	chr19	-		48554681	48554766	30			ENST00000408668	ENSEMBL	ncrna:novel chromosome:GRCh38:19:48051424:48051509:-1 gene:ENSG00000221595 gene_biotype:miRNA transcript_biotype:miRNA																									2.78485	2.4733	2.18855	2.32656
TC02001979.hg.1	6.05664	5.60679	1.3659	up	0.000458584	0.0606024	RAB11FIP5	NM_015470	RAB11 family interacting protein 5 (class I)	protein_coding	chr2	-	NM_015470	73300510	73383849	150	2p13	26056	NM_015470	RefSeq	Homo sapiens RAB11 family interacting protein 5 (class I) (RAB11FIP5), mRNA.	NM_015470	Q9BXF6	NM_015470	Hs.24557	adrenal gland| ascites| blood| bone| brain| connective tissue| embryonic tissue| eye| heart| intestine| kidney| larynx| liver| lung| mammary gland| muscle| ovary| pancreas| parathyroid| pharynx| placenta| prostate| salivary gland| skin| spleen| stomach| testis| thymus| thyroid| trachea| uterus| vascular|adrenal tumor| breast (mammary gland) tumor| chondrosarcoma| colorectal tumor| gastrointestina…	NM_015470	GO:0015031	protein transport	inferred from electronic annotation	NM_015470	GO:0000139	Golgi membrane	inferred from electronic annotation	NM_015470	GO:0005515	protein binding	inferred from physical interaction				ENST00000258098	Pfam	IPR000008	C2 domain	5.93561	5.87629	6.10972	6.30493
TC06002430.hg.1	2.58146	3.25792	-1.59821	down	0.000458688	0.0606024	accn=NULL	TCONS_00029976		ncRNA	chr6	+		2818786	2819964	30			TCONS_00029976	NONCODE	accn=NULL class=lncRNA name=Human lincRNA ref=BodyMapLinc transcriptId=TCONS_00029976 cpcScore=-0.3116430 cnci=-0.3168570																									2.58742	2.38882	2.6266	2.72301
TC10001372.hg.1	6.00584	5.65893	1.27184	up	0.000458705	0.0606024	C10orf105	NM_001164375	chromosome 10 open reading frame 105	protein_coding	chr10	-	NM_001164375	73471458	73497581	40	10q22.1	414152	NM_001164375	RefSeq	Homo sapiens chromosome 10 open reading frame 105 (C10orf105), transcript variant 1, mRNA.	NM_001164375	Q8TEF2	NM_001164375	Hs.568788	brain| connective tissue| eye| lung| non-neoplasia| normal| fetus| adult					NM_001164375	GO:0016021	integral component of membrane	inferred from electronic annotation												5.90848	6.05802	6.09923	5.95765
TC18000083.hg.1	6.72449	6.18427	1.4542	up	0.000459303	0.0606024	DQ582260	DQ582260	Homo sapiens piRNA piR-32372, complete sequence.	other	chr18	+		14502662	14502696	11			DQ582260	GenBank	Homo sapiens piRNA piR-32372, complete sequence.																									6.62029	6.81708	6.7383	6.72231
TC03003282.hg.1	3.87389	4.84123	-1.95523	down	0.000459538	0.0606024	linc_luo_1161	linc_luo_1161		ncRNA	chr3	-		194192715	194206447	50			linc_luo_1161	NONCODE	accn=NULL class=lincRNA name=Human lincRNA ref=Scripture Reconstruction LincRNAs By Luo transcriptId=linc_luo_1161 cpcScore=-1.3098700 cnci=-0.3727178																									4.15087	3.94994	3.74779	3.64695
TC01001783.hg.1	5.03197	5.45542	-1.34112	down	0.000459983	0.0606024	RPS6KC1	NM_001136138	ribosomal protein S6 kinase, 52kDa, polypeptide 1	protein_coding	chr1	+	NM_001136138	213224588	213448116	260	1q41	26750	NM_001136138	RefSeq	Homo sapiens ribosomal protein S6 kinase, 52kDa, polypeptide 1 (RPS6KC1), transcript variant 2, mRNA.	NM_001136138	Q96S38	NM_001136138	Hs.591416	adrenal gland| bladder| blood| bone| brain| cervix| connective tissue| embryonic tissue| esophagus| eye| heart| intestine| kidney| liver| lung| lymph node| mammary gland| mouth| muscle| nerve| pancreas| parathyroid| placenta| prostate| skin| stomach| testis| thyroid| trachea| uterus| vascular| breast (mammary gland) tumor| cervical tumor| chondrosarcoma| esophageal tumor| gastrointestinal tumor| …	NM_001136138	GO:0006468	protein phosphorylation	inferred from electronic annotation	NM_001136138	GO:0005737	cytoplasm	inferred from direct assay	NM_001136138	GO:0004674	protein serine/threonine kinase activity	inferred from electronic annotation				ENST00000366959	Pfam	IPR000719	Protein kinase domain	5.18709	5.06836	4.93068	4.94177
TC01003608.hg.1	5.27588	6.07699	-1.74244	down	0.000461738	0.0606024	RGS16	NM_002928	regulator of G-protein signaling 16	protein_coding	chr1	-	NM_002928	182567758	182573548	79	1q25-q31	6004	NM_002928	RefSeq	Homo sapiens regulator of G-protein signaling 16 (RGS16), mRNA.	NM_002928	O15492	NM_002928	Hs.413297	adipose tissue| ascites| bladder| blood| bone marrow| brain| connective tissue| embryonic tissue| esophagus| eye| heart| intestine| kidney| liver| lung| lymph node| mammary gland| muscle| ovary| pancreas| pharynx| pituitary gland| placenta| prostate| skin| spleen| stomach| testis| thymus| thyroid| trachea| uterus| bladder carcinoma| breast (mammary gland) tumor| chondrosarcoma| colorectal tumor| …	NM_002928	GO:0007601	visual perception	traceable author statement	NM_002928	GO:0005737	cytoplasm	not recorded	NM_002928	GO:0005096	GTPase activator activity	not recorded	NM_002928	GenMAPP	Calcium_regulation_in_cardiac_cells	ENST00000367558	Pfam	IPR000342	Regulator of G protein signalling domain	5.23977	5.2461	5.33931	5.27835
TC08000043.hg.1	5.32785	4.89303	1.35174	up	0.000462073	0.0606024	FAM90A8P	NM_001164450	family with sequence similarity 90, member A8, pseudogene	pseudogene	chr8	+	NM_001164450	7595909	7598918	40	8p23.1	441324	NM_001164450	RefSeq	[retired] Homo sapiens family with sequence similarity 90, member A8 (FAM90A8), mRNA.																									5.17646	5.50876	5.26878	5.35741
TC17002490.hg.1	3.62157	3.16578	1.37153	up	0.000462881	0.0606024	linc-TMEM220-2	TCONS_00025560-XLOC_012389		ncRNA	chr17	-		10698227	10707354	30			TCONS_00025560-XLOC_012389	Rinn lincRNA	linc-TMEM220-2 chr17:-:10698226-10707020																									3.65009	3.61368	3.71069	3.51183
TC18000056.hg.1	4.70354	4.17871	1.43876	up	0.000463172	0.0606024	DQ579650	DQ579650	Homo sapiens piRNA piR-47762, complete sequence.	other	chr18	+		11672276	11672326	27			DQ579650	GenBank	Homo sapiens piRNA piR-47762, complete sequence.																									4.67609	4.55517	4.81274	4.77016
TC06003208.hg.1	2.59466	2.18231	1.33085	up	0.000463977	0.0606024	linc_luo_485	linc_luo_485		ncRNA	chr6	+		168084231	168088891	43			linc_luo_485	NONCODE	accn=NULL class=lincRNA name=Human lincRNA ref=Scripture Reconstruction LincRNAs By Luo transcriptId=linc_luo_485 cpcScore=-1.4026600 cnci=-0.1670845																									2.47918	2.76711	2.42663	2.70573
TC02003957.hg.1	3.09897	2.63021	1.38392	up	0.000468215	0.0606101	AC092159.3	OTTHUMT00000322419	novel transcript	antisense	chr2	-	OTTHUMT00000322419	682083	683235	30			OTTHUMT00000322419	NONCODE	accn=NULL class=mRNAlike lncRNA name=vega lncRNA ref=GENCODE transcriptId=OTTHUMT00000322419 cpcScore=-1.0926100 cnci=-0.2420989 gene:OTTHUMG00000151375																									2.99268	3.13241	3.14664	3.12417
TC01002481.hg.1	5.15156	4.81412	1.26351	up	0.000468257	0.0606101	TRIM62	NM_018207	tripartite motif containing 62	protein_coding	chr1	-	NM_018207	33611003	33647671	185	1p35.1	55223	NM_018207	RefSeq	Homo sapiens tripartite motif containing 62 (TRIM62), mRNA.	NM_018207	Q9BVG3	NM_018207	Hs.656006	bone| bone marrow| brain| connective tissue| embryonic tissue| eye| heart| intestine| kidney| lung| lymph node| mammary gland| mouth| nerve| ovary| placenta| prostate| skin| spleen| testis| thymus| thyroid| trachea| uterus| chondrosarcoma| colorectal tumor| germ cell tumor| glioma| head and neck tumor| leukemia| lung tumor| non-neoplasia| normal| ovarian tumor| primitive neuroectodermal tumor of …	NM_018207	GO:0016567	protein ubiquitination	inferred from electronic annotation	NM_018207	GO:0005737	cytoplasm	inferred from electronic annotation	NM_018207	GO:0008270	zinc ion binding	inferred from electronic annotation				ENST00000291416	Pfam	IPR000315	Zinc finger, B-box	5.08978	5.19125	5.15816	5.16703
TC02002778.hg.1	4.64933	4.31343	1.26216	up	0.000469039	0.0606101	PRKAG3	NM_017431	protein kinase, AMP-activated, gamma 3 non-catalytic subunit	protein_coding	chr2	-	NM_017431	219687106	219696809	202	2q35	53632	NM_017431	RefSeq	Homo sapiens protein kinase, AMP-activated, gamma 3 non-catalytic subunit (PRKAG3), mRNA.	NM_017431	Q9UGI9	NM_017431	Hs.591634	heart| mammary gland| muscle| breast (mammary gland) tumor| normal| fetus| adult	NM_017431	GO:0005978	glycogen biosynthetic process	inferred from electronic annotation	NM_017431	GO:0005615	extracellular space	inferred from direct assay	NM_017431	GO:0004679	AMP-activated protein kinase activity	traceable author statement	NM_017431	GenMAPP	Fatty_Acid_Synthesis	ENST00000439262	Pfam	IPR000644	CBS domain	4.62318	4.66791	4.629	4.67722
TC19000008.hg.1	6.66231	6.24869	1.33202	up	0.000469809	0.0606101	GZMM	NM_005317	granzyme M (lymphocyte met-ase 1)	protein_coding	chr19	+	NM_005317	544027	549919	60	19p13.3	3004	NM_005317	RefSeq	Homo sapiens granzyme M (lymphocyte met-ase 1) (GZMM), transcript variant 1, mRNA.	NM_005317	P51124	NM_005317	Hs.465511	intestine| lung| thymus| vascular| normal| fetus| adult	NM_005317	GO:0006508	proteolysis	inferred from electronic annotation	NM_005317	GO:0005576	extracellular region	inferred from electronic annotation	NM_005317	GO:0004252	serine-type endopeptidase activity	inferred from electronic annotation				ENST00000264553	Pfam	IPR001254	Peptidase S1	6.56714	6.64623	6.77041	6.66548
TC12003116.hg.1	3.03166	2.62113	1.32918	up	0.000469832	0.0606101	linc-TAOK3-1	TCONS_00020947-XLOC_010216		ncRNA	chr12	-		119391194	119393930	47			TCONS_00020947-XLOC_010216	Rinn lincRNA	linc-TAOK3-1 chr12:-:119391193-119393930																									2.97937	2.96752	3.06655	3.11322
TC05002997.hg.1	2.60866	2.25398	1.2787	up	0.000471243	0.0606101	linc-MOCS2-2	TCONS_l2_00022896-XLOC_l2_012035		ncRNA	chr5	-		53072051	53115516	90			TCONS_l2_00022896-XLOC_l2_012035	Broad TUCP	linc-MOCS2-2 chr5:-:53072050-53111931																									2.62921	2.61457	2.64734	2.54352
TC09000990.hg.1	4.34297	5.14537	-1.744	down	0.000472621	0.0606101	C9orf72	NM_001256054	chromosome 9 open reading frame 72	protein_coding	chr9	-	NM_001256054	27546543	27573864	174	9p21.2	203228	NM_001256054	RefSeq	Homo sapiens chromosome 9 open reading frame 72 (C9orf72), transcript variant 3, mRNA.	NM_001256054	Q96LT7	NM_001256054	Hs.493639	bladder| blood| bone marrow| brain| connective tissue| embryonic tissue| eye| heart| intestine| kidney| liver| lung| lymph node| mouth| muscle| pancreas| pharynx| pituitary gland| placenta| prostate| skin| stomach| testis| thymus| thyroid| trachea| uterus| vascular| bladder carcinoma| colorectal tumor| gastrointestinal tumor| germ cell tumor| head and neck tumor| leukemia| liver tumor| lymphoma| …	NM_001256054	GO:0006897	endocytosis	inferred from mutant phenotype	NM_001256054	GO:0005615	extracellular space	inferred from direct assay	NM_001256054	GO:0005515	protein binding	inferred from physical interaction								4.58641	4.53031	4.07156	4.18359
TC09001747.hg.1	5.17423	4.80551	1.29121	up	0.000472815	0.0606101	RP11-229P13.19	OTTHUMT00000055219	novel transcript	ncRNA	chr9	-	OTTHUMT00000055219	139869546	139871433	30			OTTHUMT00000055219	Havana transcript	cdna:all chromosome:VEGA56:9:136975094:136976981:1 Gene:OTTHUMG00000020963			ENST00000413913	Hs.597830	blood| eye| spleen| normal| fetus| adult																				5.11265	5.26698	5.18224	5.13506
TC04002426.hg.1	4.78523	4.33595	1.36536	up	0.000473999	0.0606101	LOC100133461	BC039423	uncharacterized LOC100133461	ncRNA	chr4	-	BC039423	3675320	3679582	30		100133461	BC039423	NONCODE	accn=BC039423 class=mRNAlike lncRNA name=Human lncRNA ref=JounralRNA transcriptId=2259 cpcScore=-0.9536920 cnci=-0.1526882			BC039423	Hs.554274	brain| normal																				4.80555	4.77593	4.86356	4.69588
TC21001032.hg.1	4.6134	4.25102	1.28555	up	0.000474609	0.0606101	linc-C21orf2-2	TCONS_00028957-XLOC_014118		ncRNA	chr21	-		45867206	45875167	97			TCONS_00028957-XLOC_014118	Rinn lincRNA	linc-C21orf2-2 chr21:-:45870868-45875167																									4.56597	4.58029	4.63747	4.66987
TC0X001130.hg.1	4.34588	3.92798	1.33599	up	0.000474657	0.0606101	CXorf49B	NM_001145139	chromosome X open reading frame 49B	protein_coding	chrX	-	NM_001145139	70934221	70938135	70	Xq13.1	100132994	NM_001145139	RefSeq	Homo sapiens chromosome X open reading frame 49B (CXorf49B), mRNA.	NM_001145140	A8MYA2	NM_001145139	Hs.719592	lymph node| placenta| gastrointestinal tumor| germ cell tumor																				4.16297	4.33772	4.42441	4.45843
TC18000163.hg.1	5.23062	4.75573	1.38981	up	0.000476535	0.0606101	TRNA_Glu	uc021ujf.1		other	chr18	+		43299751	43299822	30			uc021ujf.1	UCSC Genes	transfer RNA Glu (anticodon CTC)																									5.33527	5.3074	5.05008	5.22973
TC01001558.hg.1	6.02811	6.4537	-1.34312	down	0.000476778	0.0606101	CEP350	NM_014810	centrosomal protein 350kDa	protein_coding	chr1	+	NM_014810	179923873	180093886	549	1q25.2	9857	NM_014810	RefSeq	Homo sapiens centrosomal protein 350kDa (CEP350), mRNA.	NM_014810	Q5VT06	NM_014810	Hs.413045	adrenal gland| ascites| blood| bone| bone marrow| brain| cervix| connective tissue| ear| embryonic tissue| esophagus| eye| heart| intestine| kidney| liver| lung| lymph| lymph node| mammary gland| mouth| muscle| nerve| ovary| pancreas| parathyroid| pharynx| placenta| prostate| salivary gland| skin| stomach| testis| thymus| umbilical cord| uterus|adrenal tumor| bladder carcinoma| breast (mammary gl…	NM_014810	GO:0034453	microtubule anchoring	inferred from electronic annotation	NM_014810	GO:0005634	nucleus	inferred from direct assay	NM_014810	GO:0008017	microtubule binding	inferred from electronic annotation				ENST00000367607	Pfam	IPR000938	CAP Gly-rich domain	6.02428	6.10561	6.04807	5.93448
TC11002872.hg.1	4.60767	4.14586	1.37726	up	0.000476836	0.0606101	uc001pof.1	uc001pof.1		ncRNA	chr11	+		113659953	113661882	30			uc001pof.1	NONCODE	accn=NULL class=lncRNA name= ref=UCSCGeneNoncode transcriptId=uc001pof.1 cpcScore=6.0824500 cnci=-0.2616528																									4.51014	4.52057	4.68654	4.71342
TC17002253.hg.1	4.32957	3.75863	1.48549	up	0.000478208	0.0606101	linc_luo_896	linc_luo_896		ncRNA	chr17	+		46662876	46663444	30			linc_luo_896	NONCODE	accn=NULL class=lincRNA name=Human lincRNA ref=Scripture Reconstruction LincRNAs By Luo transcriptId=linc_luo_896 cpcScore=-1.4361300 cnci=-0.1267162																									4.29532	4.25056	4.49261	4.27979
TC08000755.hg.1	6.316	5.98276	1.25984	up	0.000478397	0.0606101	MIR1207	NR_031612	microRNA 1207	miRNA	chr8	+	NR_031612	129061398	129061484	30		100302175	NR_031612	RefSeq	Homo sapiens microRNA 1207 (MIR1207), microRNA.																									6.41847	6.28588	6.33423	6.2254
TC05002617.hg.1	3.99326	5.0243	-2.0435	down	0.000481498	0.0608176	LYRM7	BC022429	LYR motif containing 7	protein_coding	chr5	+	BC022429	130540152	130541120	30	5q23.3	90624	BC022429	NONCODE	accn=BC022429 class=mRNAlike lncRNA name=Human lncRNA ref=JounralRNA transcriptId=3073 cpcScore=-1.1628100 cnci=-0.3184766	BC022429	Q5U5X0	BC022429	Hs.115467	adrenal gland| bladder| blood| bone| bone marrow| brain| connective tissue| embryonic tissue| eye| intestine| kidney| liver| lung| lymph| lymph node| mammary gland| mouth| muscle| nerve| ovary| pancreas| parathyroid| pharynx| placenta| prostate| skin| testis| thyroid| uterus|adrenal tumor| bladder carcinoma| breast (mammary gland) tumor| chondrosarcoma| colorectal tumor| germ cell tumor| glioma| …					BC022429	GO:0005759	mitochondrial matrix	inferred from electronic annotation												3.98849	3.87394	3.89501	4.21559
TC0X001326.hg.1	5.57618	6.10187	-1.43962	down	0.000482288	0.0608176	CUL4B	NM_001079872	cullin 4B	protein_coding	chrX	-	NM_001079872	119658446	119709684	340	Xq23	8450	NM_001079872	RefSeq	Homo sapiens cullin 4B (CUL4B), transcript variant 2, mRNA.	NM_001079872	Q13620	NM_001079872	Hs.102914	adipose tissue| adrenal gland| ascites| bladder| blood| bone| bone marrow| brain| cervix| connective tissue| ear| embryonic tissue| eye| heart| intestine| kidney| larynx| liver| lung| lymph| lymph node| mammary gland| mouth| muscle| nerve| ovary| pancreas| pituitary gland| placenta| prostate| skin| spleen| stomach| testis| thymus| thyroid| trachea| uterus| vascular| breast (mammary gland) tumor| …	NM_001079872	GO:0006511	ubiquitin-dependent protein catabolic process	inferred from electronic annotation	NM_001079872	GO:0005634	nucleus	inferred from direct assay	NM_001079872	GO:0003684	damaged DNA binding	inferred from direct assay				ENST00000336592	Pfam	IPR001373	Cullin, N-terminal	5.43829	5.55981	5.64228	5.66434
TC13000533.hg.1	3.05302	2.52029	1.44666	up	0.000483894	0.0608176	LINC01058	ENST00000420694	long intergenic non-protein coding RNA 1058	ncRNA	chr13	-	ENST00000420694	30993656	30996374	30			ENST00000420694	ENSEMBL	havana:known chromosome:GRCh38:13:30419519:30422237:-1 gene:ENSG00000225039 gene_biotype:lincRNA transcript_biotype:lincRNA																									3.06069	3.11196	3.18399	2.85542
TC0X000392.hg.1	4.36729	3.8834	1.39851	up	0.000484054	0.0608176	CXorf49B	NM_001145139	chromosome X open reading frame 49B	protein_coding	chrX	+	NM_001145139	70983140	70987054	70	Xq13.1	100132994	NM_001145139	RefSeq	Homo sapiens chromosome X open reading frame 49B (CXorf49B), mRNA.	NM_001145140	A8MYA2	NM_001145139	Hs.719592	lymph node| placenta| gastrointestinal tumor| germ cell tumor																				4.16784	4.35876	4.41071	4.53187
TC19001101.hg.1	4.46551	4.10351	1.2852	up	0.000484598	0.0608176	CD70	NM_001252	CD70 molecule	protein_coding	chr19	-	NM_001252	6583135	6591163	60	19p13	970	NM_001252	RefSeq	Homo sapiens CD70 molecule (CD70), mRNA.	NM_001252	P32970	NM_001252	Hs.501497	blood| brain| connective tissue| eye| kidney| lung| lymph| ovary| pancreas| prostate| skin| stomach| testis| gastrointestinal tumor| germ cell tumor| glioma| kidney tumor| lung tumor| lymphoma| normal| ovarian tumor| pancreatic tumor| prostate cancer| skin tumor| soft tissue/muscle tissue tumor| adult	NM_001252	GO:0006955	immune response	inferred from electronic annotation	NM_001252	GO:0005615	extracellular space	inferred from electronic annotation	NM_001252	GO:0002020	protease binding	inferred from physical interaction				ENST00000245903	Pfam	IPR006052	Tumour necrosis factor domain	4.47453	4.40484	4.45459	4.52808
TC01003409.hg.1	7.9257	4.19525	13.2733	up	0.000485439	0.0608176	ITLN1	NM_017625	intelectin 1 (galactofuranose binding)	protein_coding	chr1	-	NM_017625	160846329	160854960	100	1q21.3	55600	NM_017625	RefSeq	Homo sapiens intelectin 1 (galactofuranose binding) (ITLN1), mRNA.	NM_017625	Q8WWA0	NM_017625	Hs.50813	adipose tissue| brain| heart| intestine| kidney| lung| muscle| stomach| testis| vascular| bladder carcinoma| colorectal tumor| gastrointestinal tumor| non-neoplasia| normal| fetus| adult	NM_017625	GO:0001934	positive regulation of protein phosphorylation	inferred from direct assay	NM_017625	GO:0031225	anchored component of membrane	inferred from electronic annotation												10.0167	6.065	8.40859	7.21251
TC15000399.hg.1	3.84736	4.28668	-1.35596	down	0.000488354	0.0609328	AP4E1	NM_001252127	adaptor-related protein complex 4, epsilon 1 subunit	protein_coding	chr15	+	NM_001252127	51200869	51298097	269	15q21.2	23431	NM_001252127	RefSeq	Homo sapiens adaptor-related protein complex 4, epsilon 1 subunit (AP4E1), transcript variant 2, mRNA.	NM_001252127	Q9UPM8	NM_001252127	Hs.413366	ascites| bladder| blood| bone| bone marrow| brain| embryonic tissue| eye| intestine| larynx| liver| lung| lymph node| mammary gland| muscle| placenta| prostate| skin| testis| thymus| thyroid| uterus| breast (mammary gland) tumor| colorectal tumor| gastrointestinal tumor| germ cell tumor| glioma| head and neck tumor| leukemia| lung tumor| normal| prostate cancer| retinoblastoma| soft tissue/muscle…	NM_001252127	GO:0006886	intracellular protein transport	inferred from electronic annotation	NM_001252127	GO:0005794	Golgi apparatus	inferred from electronic annotation	ENST00000261842	GO:0005198	structural molecule activity	inferred from electronic annotation				ENST00000261842	Pfam	IPR002553	Clathrin/coatomer adaptor, adaptin-like, N-terminal	3.77486	3.89396	3.91938	3.80126
TC02005063.hg.1	5.41798	5.90359	-1.40018	down	0.000488478	0.0609328	BAZ2B	NM_013450	bromodomain adjacent to zinc finger domain, 2B	protein_coding	chr2	-	NM_013450	160175490	160473203	610	2q24.2	29994	NM_013450	RefSeq	Homo sapiens bromodomain adjacent to zinc finger domain, 2B (BAZ2B), transcript variant 1, mRNA.	NM_013450	Q9UIF8	NM_013450	Hs.470369	adrenal gland| ascites| bladder| blood| bone| bone marrow| brain| cervix| connective tissue| ear| embryonic tissue| eye| heart| intestine| kidney| liver| lung| lymph node| mammary gland| mouth| muscle| nerve| ovary| pancreas| parathyroid| pharynx| pituitary gland| placenta| prostate| skin| spleen| stomach| testis| thymus| thyroid| trachea| uterus| vascular|adrenal tumor| breast (mammary gland) tu…	NM_013450	GO:0006351	transcription, DNA-templated	non-traceable author statement	NM_013450	GO:0005634	nucleus	inferred from electronic annotation	NM_013450	GO:0003677	DNA binding	inferred from electronic annotation				ENST00000343439	Pfam	IPR001487	Bromodomain	5.49729	5.42163	5.324	5.42898
TC07003173.hg.1	4.37289	5.33748	-1.95151	down	0.000489065	0.0609328	BC046223	BC046223		ncRNA	chr7	-		130635254	130636798	30			BC046223	NONCODE	accn=BC046223 class=mRNAlike lncRNA name=Human lncRNA ref=JounralRNA transcriptId=3788 cpcScore=-0.9321770 cnci=-0.2016420			BC046223	Hs.688147																					4.91763	4.5627	3.95925	4.05199
TC11002524.hg.1	5.85776	5.39016	1.3828	up	0.000490395	0.060986	linc-ART1-5	TCONS_00019136-XLOC_009029		ncRNA	chr11	+		3210776	3211159	30			TCONS_00019136-XLOC_009029	Rinn lincRNA	linc-ART1-5 chr11:+:3210775-3211159																									5.94838	5.89278	5.95585	5.634
TC18000336.hg.1	5.82361	5.2106	1.52944	up	0.000492371	0.0609974	DQ577739	DQ577739	Homo sapiens piRNA piR-45851, complete sequence.	other	chr18	-		11659557	11659590	10			DQ577739	GenBank	Homo sapiens piRNA piR-45851, complete sequence.																									5.59886	5.95224	5.68327	6.06006
TC04001596.hg.1	2.62073	2.01452	1.52225	up	0.000493989	0.0609974	RP11-586L23.1	OTTHUMT00000364738	novel transcript	ncRNA	chr4	-	OTTHUMT00000364738	142161893	142199943	30			OTTHUMT00000364738	Havana transcript	cdna:all chromosome:VEGA56:4:141240739:141278789:-1 Gene:OTTHUMG00000161379																									2.49447	2.50491	2.8671	2.61644
TC01004312.hg.1	4.54412	5.05984	-1.42971	down	0.000494519	0.0609974	ZMYM1	AK125741	zinc finger, MYM-type 1	protein_coding	chr1	+	AK125741	35525387	35578816	110	1p34.3	79830	AK125741	NONCODE	accn=AK125741 class=mRNAlike lncRNA name=Human lncRNA ref=JounralRNA transcriptId=4743 cpcScore=6.2155700 cnci=-0.2995223	AK125741	B3KWS9	AK125741	Hs.471243	bone| bone marrow| brain| embryonic tissue| eye| heart| kidney| liver| lung| muscle| parathyroid| pharynx| placenta| prostate| skin| spleen| testis| thymus| trachea| uterus| chondrosarcoma| germ cell tumor| kidney tumor| leukemia| liver tumor| lung tumor| non-neoplasia| normal| soft tissue/muscle tissue tumor| uterine tumor|embryoid body| blastocyst| fetus| adult					AK125741	GO:0005634	nucleus	inferred from electronic annotation	AK125741	GO:0003676	nucleic acid binding	inferred from electronic annotation								4.43271	4.62273	4.59797	4.52306
TC02004778.hg.1	5.11267	5.76849	-1.57552	down	0.000495424	0.0609974	ORC2	NR_033915	origin recognition complex, subunit 2	protein_coding	chr2	-	NR_033915	201774894	201828424	168	2q33	4999	NR_033915	NONCODE	accn=NR_033915 class=lncRNA name= ref=RefGeneNoncode transcriptId=NR_033915 cpcScore=9.0460800 cnci=-0.3636759	NR_033915	Q13416	NR_033915	Hs.444870	adrenal gland| ascites| bladder| blood| bone| bone marrow| brain| cervix| connective tissue| embryonic tissue| esophagus| eye| intestine| kidney| liver| lung| lymph| mammary gland| mouth| muscle| nerve| parathyroid| pituitary gland| placenta| prostate| salivary gland| skin| spleen| stomach| testis| thymus| thyroid| uterus| vascular| bladder carcinoma| breast (mammary gland) tumor| cervical tumor|…	NR_033915	GO:0000082	G1/S transition of mitotic cell cycle	traceable author statement	NR_033915	GO:0000792	heterochromatin	inferred from electronic annotation	NR_033915	GO:0003688	DNA replication origin binding	inferred from electronic annotation	NR_033915	GenMAPP	Cell_cycle_KEGG					5.27406	5.18566	4.9515	5.03945
TC11001936.hg.1	5.29077	4.89923	1.31179	up	0.000496015	0.0609974	SSSCA1-AS1	NR_038923	SSSCA1 antisense RNA 1 (head to head)	processed_transcript	chr11	-	NR_038923	65336691	65337884	30	11q13.1	254100	NR_038923	RefSeq	Homo sapiens SSSCA1 antisense RNA 1 (head to head) (SSSCA1-AS1), long non-coding RNA.			NR_038923	Hs.595927	brain| eye| heart| kidney| lung| mammary gland| ovary| pancreas| prostate| skin| spleen| testis| thymus| trachea| germ cell tumor| normal| ovarian tumor| prostate cancer| retinoblastoma| fetus| adult																				5.40566	5.1178	5.33645	5.30316
TC02001696.hg.1	3.70712	5.22071	-2.85521	down	0.000496676	0.0609974	BRE-AS1	NR_028308	BRE antisense RNA 1	ncRNA	chr2	-	NR_028308	28112323	28113981	30	2p23	100302650	NR_028308	RefSeq	Homo sapiens BRE antisense RNA 1 (BRE-AS1), long non-coding RNA.			NR_028308	Hs.729719	bone| brain| eye| lung| lymph node| ovary| pancreas| pituitary gland| placenta| skin| uterus| chondrosarcoma| lymphoma| normal| soft tissue/muscle tissue tumor| uterine tumor| adult																				3.76468	3.54246	3.54981	3.97153
TC20000224.hg.1	3.96489	3.54633	1.33659	up	0.000497661	0.0609974	Mir_652	uc021wby.1		other	chr20	+		31677883	31677978	30			uc021wby.1	UCSC Genes	Rfam model RF00872 hit found at contig region AL121756.14/101757-101852																									4.03108	3.80874	4.02515	3.99457
TC07000362.hg.1	4.41188	3.88016	1.44565	up	0.000498657	0.0609974	MIR4283-1	NR_036246	microRNA 4283-1	miRNA	chr7	+	NR_036246	63081468	63081547	30		100422917	NR_036246	RefSeq	Homo sapiens microRNA 4283-1 (MIR4283-1), microRNA.																									4.43611	4.35343	4.44674	4.41124
TC07001428.hg.1	4.41188	3.88016	1.44565	up	0.000498657	0.0609974	MIR4283-1	NR_036246	microRNA 4283-1	miRNA	chr7	-	NR_036246	57023492	57023571	30		100422917	NR_036246	RefSeq	Homo sapiens microRNA 4283-1 (MIR4283-1), microRNA.																									4.43611	4.35343	4.44674	4.41124
TC21000502.hg.1	5.02811	4.51091	1.43118	up	0.000500382	0.0609974	AP001631.9	OTTHUMT00000195569	putative novel transcript	other	chr21	-	OTTHUMT00000195569	44560633	44561202	30			OTTHUMT00000195569	Havana transcript	cdna:all chromosome:VEGA56:21:43140523:43141092:-1 Gene:OTTHUMG00000086845			ENST00000424933	Hs.548780	intestine																				4.94154	4.91269	5.14142	5.1168
TC15000316.hg.1	4.6389	4.26359	1.29712	up	0.000500619	0.0609974	LOC100289090	ENST00000309874	uncharacterized LOC100289090	unknown	chr15	+	ENST00000309874	42184991	42188133	30	15q15.1	100289090	ENST00000309874	ENSEMBL	havana:known chromosome:GRCh38:15:41892793:41895935:1 gene:ENSG00000174171 gene_biotype:antisense transcript_biotype:antisense	ENST00000309874	Q8TCB4	ENST00000309874	Hs.650238	intestine| kidney| lung| trachea| normal| fetus																				4.58595	4.70542	4.58463	4.67961
TC13000914.hg.1	2.81608	2.49571	1.24865	up	0.000501972	0.0609974	linc-MPHOSPH8-4	TCONS_00021467-XLOC_010288		ncRNA	chr13	+		19582399	19589338	102			TCONS_00021467-XLOC_010288	Rinn lincRNA	linc-MPHOSPH8-4 chr13:+:19582398-19586774																									2.79366	2.91155	2.77958	2.77953
TC21000961.hg.1	2.81723	2.39715	1.338	up	0.00050495	0.0609974	TTC3-AS1	BC066351	TTC3 antisense RNA 1	antisense	chr21	-	BC066351	38559913	38566227	30		100874006	BC066351	NONCODE	accn=BC066351 class=mRNAlike lncRNA name=Human lncRNA ref=JounralRNA transcriptId=1927 cpcScore=-1.1719800 cnci=-0.4017797			BC066351	Hs.570411	brain| testis| non-neoplasia| normal| adult																				2.68102	2.909	2.85595	2.82293
TC0X001735.hg.1	3.048	3.44017	-1.31237	down	0.000505489	0.0609974	linc-ZC3H12B-3	TCONS_l2_00030233-XLOC_l2_015543		ncRNA	chrX	+		63264305	63265448	30			TCONS_l2_00030233-XLOC_l2_015543	Broad TUCP	linc-ZC3H12B-3 chrX:+:63264304-63265448																									3.07025	3.06135	2.96062	3.09979
TC21000402.hg.1	3.87792	3.56781	1.2398	up	0.000507122	0.0609974	C21orf62	NM_001162495	chromosome 21 open reading frame 62	protein_coding	chr21	-	NM_001162495	34162984	34186053	140	21q22.11	56245	NM_001162495	RefSeq	Homo sapiens chromosome 21 open reading frame 62 (C21orf62), transcript variant 1, mRNA.	NM_001162495	Q9NYP8	NM_001162495	Hs.517235	brain| cervix| embryonic tissue| kidney| pancreas| prostate| stomach| testis| uterus| gastrointestinal tumor| germ cell tumor| glioma| normal| pancreatic tumor| uterine tumor| blastocyst| fetus| adult	NM_001162495	GO:0008150	biological_process	no biological data available	NM_001162495	GO:0005575	cellular_component	no biological data available	NM_001162495	GO:0003674	molecular_function	no biological data available								3.95752	3.88413	3.87049	3.79954
TC02002219.hg.1	3.88858	5.7363	-3.5993	down	0.000507723	0.0609974	IL1B	NM_000576	interleukin 1, beta	protein_coding	chr2	-	NM_000576	113587328	113594480	197	2q14	3553	NM_000576	RefSeq	Homo sapiens interleukin 1, beta (IL1B), mRNA.	NM_000576	P01584	NM_000576	Hs.126256	bladder| blood| bone marrow| brain| connective tissue| esophagus| eye| intestine| liver| lung| mouth| muscle| pancreas| pharynx| skin| spleen| stomach| testis| uterus| vascular| bladder carcinoma| chondrosarcoma| colorectal tumor| esophageal tumor| gastrointestinal tumor| germ cell tumor| glioma| head and neck tumor| leukemia| liver tumor| lung tumor| non-neoplasia| normal| pancreatic tumor| skin…					NM_000576	GO:0005576	extracellular region	inferred from direct assay	NM_000576	GO:0005125	cytokine activity	inferred from direct assay	NM_000576	GenMAPP	Smooth_muscle_contraction	ENST00000263341	Pfam	IPR000975	Interleukin-1 family	3.8298	4.00762	3.84798	3.86894
TC17000505.hg.1	2.44117	1.97098	1.3853	up	0.000508671	0.0609974	KRTAP9-3	NM_031962	keratin associated protein 9-3	protein_coding	chr17	+	NM_031962	39388715	39389706	30	17q21.2	83900	NM_031962	RefSeq	Homo sapiens keratin associated protein 9-3 (KRTAP9-3), mRNA.	NM_031962	Q9BYQ3	NM_031962	Hs.307012						NM_031962	GO:0045095	keratin filament	inferred from electronic annotation												2.36366	2.58606	2.26907	2.5459
TC07000935.hg.1	7.40028	6.93626	1.37938	up	0.000509344	0.0609974	ZYX	NM_001010972	zyxin	protein_coding	chr7	+	NM_001010972	143058810	143088206	256	7q32	7791	NM_001010972	RefSeq	Homo sapiens zyxin (ZYX), transcript variant 2, mRNA.	NM_001010972	Q15942	NM_001010972	Hs.490415	adipose tissue| adrenal gland| ascites| bladder| blood| bone| bone marrow| brain| cervix| connective tissue| embryonic tissue| esophagus| eye| heart| intestine| kidney| larynx| liver| lung| lymph| lymph node| mammary gland| mouth| muscle| ovary| pancreas| parathyroid| pharynx| placenta| prostate| salivary gland| skin| spleen| stomach| testis| thymus| thyroid| tonsil| trachea| uterus| vascular|adr…	NM_001010972	GO:0007155	cell adhesion	inferred from electronic annotation	NM_001010972	GO:0001725	stress fiber	inferred from direct assay	NM_001010972	GO:0005515	protein binding	inferred from physical interaction	NM_001010972	GenMAPP	Integrin-mediated_cell_adhesion_KEGG	ENST00000392910	Pfam	IPR001781	Zinc finger, LIM-type	7.2461	7.32273	7.38824	7.64406
TC09002594.hg.1	7.39975	8.04309	-1.56193	down	0.000510125	0.0609974	ZFAND5	X75687	zinc finger, AN1-type domain 5	protein_coding	chr9	-	X75687	74970779	74971015	30	9q13-q21	7763	X75687	NONCODE	accn=X75687 class=mRNAlike lncRNA name=NULL ref=H-invitational v7.5 transcriptId=HIT000323539 cpcScore=1.0789200 cnci=-0.2313514	X75687	O76080	X75687	Hs.406096	adipose tissue| adrenal gland| ascites| bladder| blood| bone| bone marrow| brain| cervix| connective tissue| ear| embryonic tissue| esophagus| eye| heart| intestine| kidney| larynx| liver| lung| lymph node| mammary gland| mouth| muscle| nerve| ovary| pancreas| parathyroid| pharynx| pituitary gland| placenta| prostate| salivary gland| skin| spleen| stomach| testis| thymus| thyroid| trachea| uterus…	X75687	GO:0001701	in utero embryonic development	inferred from electronic annotation	X75687	GO:0005737	cytoplasm	inferred from electronic annotation	X75687	GO:0003677	DNA binding	inferred from electronic annotation								7.2862	7.66418	7.25736	7.39127
TC01006389.hg.1	5.82055	6.31379	-1.4076	down	0.000510212	0.0609974	ARID4B	NM_001206794	AT rich interactive domain 4B (RBP1-like)	protein_coding	chr1	-	NM_001206794	235330210	235491534	450	1q42.1-q43	51742	NM_001206794	RefSeq	Homo sapiens AT rich interactive domain 4B (RBP1-like) (ARID4B), transcript variant 3, mRNA.	NM_001206794	Q4LE39	NM_001206794	Hs.575782	adrenal gland| blood| bone| bone marrow| brain| cervix| connective tissue| ear| embryonic tissue| eye| heart| intestine| kidney| liver| lung| lymph| lymph node| mammary gland| mouth| muscle| ovary| pancreas| parathyroid| pharynx| pituitary gland| placenta| prostate| skin| spleen| stomach| testis| thymus| thyroid| trachea| uterus| vascular| breast (mammary gland) tumor| cervical tumor| chondrosarc…	NM_001206794	GO:0006349	regulation of gene expression by genetic imprinting	inferred from electronic annotation	NM_001206794	GO:0005634	nucleus	inferred from electronic annotation	NM_001206794	GO:0003677	DNA binding	inferred from electronic annotation				ENST00000264183	Pfam	IPR001606	ARID/BRIGHT DNA-binding domain	5.82458	5.82881	5.79886	5.82994
TC14000243.hg.1	4.35661	3.92686	1.347	up	0.000510861	0.0609974	SSTR1	NM_001049	somatostatin receptor 1	protein_coding	chr14	+	NM_001049	38677204	38682272	60	14q13	6751	NM_001049	RefSeq	Homo sapiens somatostatin receptor 1 (SSTR1), mRNA.	NM_001049	P30872	NM_001049	Hs.248160	brain| cervix| kidney| lung| pancreas| skin| cervical tumor| normal| pancreatic tumor| fetus| infant| adult	NM_001049	GO:0007166	cell surface receptor signaling pathway	traceable author statement	NM_001049	GO:0005737	cytoplasm	inferred from electronic annotation	NM_001049	GO:0004994	somatostatin receptor activity	inferred from direct assay	NM_001049	GenMAPP	GPCRDB_Class_A_Rhodopsin-like	ENST00000267377	Pfam	IPR000276	G protein-coupled receptor, rhodopsin-like	4.23955	4.27962	4.46694	4.44035
TC02000281.hg.1	8.77609	8.29322	1.39753	up	0.000510998	0.0609974	EPAS1	NM_001430	endothelial PAS domain protein 1	protein_coding	chr2	+	NM_001430	46520806	46613842	329	2p21-p16	2034	NM_001430	RefSeq	Homo sapiens endothelial PAS domain protein 1 (EPAS1), mRNA.	NM_001430	Q99814	NM_001430	Hs.468410	adipose tissue| adrenal gland| ascites| bladder| blood| bone| bone marrow| brain| cervix| connective tissue| ear| embryonic tissue| eye| heart| intestine| kidney| liver| lung| lymph| lymph node| mammary gland| mouth| muscle| nerve| ovary| pancreas| parathyroid| pharynx| pituitary gland| placenta| prostate| salivary gland| skin| spleen| stomach| testis| thymus| thyroid| trachea| umbilical cord| ut…	NM_001430	GO:0001525	angiogenesis	inferred from electronic annotation	NM_001430	GO:0005654	nucleoplasm	traceable author statement	NM_001430	GO:0001077	RNA polymerase II core promoter proximal region sequence-specific DNA binding transcription factor activity involved in positive regulation of transcription	inferred from electronic annotation				ENST00000263734	Pfam	IPR013655	PAS fold-3	8.55893	8.8172	8.75779	8.97045
TC14000528.hg.1	4.26409	3.62428	1.55812	up	0.000511262	0.0609974	DQ574857	DQ574857	Homo sapiens piRNA piR-42969, complete sequence.	other	chr14	+		88630757	88630811	30			DQ574857	GenBank	Homo sapiens piRNA piR-42969, complete sequence.																									4.20624	4.17486	4.19649	4.47876
TC17002389.hg.1	4.7455	5.2737	-1.44213	down	0.000512506	0.0610379	TNRC6C	BC039479	trinucleotide repeat containing 6C	protein_coding	chr17	+	BC039479	76000249	76027924	40	17q25.3	57690	BC039479	NONCODE	accn=BC039479 class=mRNAlike lncRNA name=Human lncRNA ref=JounralRNA transcriptId=5229 cpcScore=1.3720300 cnci=-0.1348333	BC039479	Q9HCJ0	BC039479	Hs.569831	adrenal gland| bladder| blood| bone| brain| connective tissue| ear| embryonic tissue| eye| heart| intestine| kidney| larynx| liver| lung| lymph node| mammary gland| muscle| nerve| ovary| pancreas| parathyroid| placenta| prostate| skin| spleen| testis| thymus| trachea| uterus| vascular|adrenal tumor| bladder carcinoma| breast (mammary gland) tumor| chondrosarcoma| colorectal tumor| gastrointestina…	BC039479	GO:0007173	epidermal growth factor receptor signaling pathway	traceable author statement	BC039479	GO:0005829	cytosol	traceable author statement	BC039479	GO:0000166	nucleotide binding	inferred from electronic annotation								4.75192	4.66129	4.86252	4.70626
TC11003090.hg.1	5.28938	4.91795	1.29363	up	0.000513515	0.0610505	BDNF	AB038671	brain-derived neurotrophic factor	protein_coding	chr11	-	AB038671	27679972	27742225	69	11p13	627	AB038671	NONCODE	accn=AB038671 class=mRNAlike lncRNA name=NULL ref=H-invitational v7.5 transcriptId=HIT000059238 cpcScore=-0.2425480 cnci=-0.2892063	AB038671	Q96TC2	AB038671	Hs.502182	adrenal gland| brain| connective tissue| embryonic tissue| eye| heart| liver| lung| prostate| skin| testis| thyroid| uterus|adrenal tumor| chondrosarcoma| germ cell tumor| liver tumor| non-neoplasia| normal| soft tissue/muscle tissue tumor|embryoid body| fetus| adult	AB038671	GO:0001657	ureteric bud development	inferred from electronic annotation	AB038671	GO:0005576	extracellular region	inferred from electronic annotation	AB038671	GO:0005169	neurotrophin TRKB receptor binding	inferred from electronic annotation								5.19183	5.37529	5.20796	5.38244
TC22000770.hg.1	3.40124	2.68984	1.63739	up	0.000515172	0.0611398	DQ574393	DQ574393	Homo sapiens piRNA piR-42505, complete sequence.	other	chr22	-		37763101	37763154	30			DQ574393	GenBank	Homo sapiens piRNA piR-42505, complete sequence.																									3.38792	3.50415	3.38814	3.32477
TC06003331.hg.1	2.45927	3.23244	-1.70902	down	0.000517776	0.0613018	HLA-C	AJ537578	major histocompatibility complex, class I, C	protein_coding	chr6	-	AJ537578	2584899	2586733	50	6p21.3	3107	AJ537578	NONCODE	accn=AJ537578 class=mRNAlike lncRNA name=NULL ref=H-invitational v7.5 transcriptId=HIT000248569 cpcScore=2.6435700 cnci=-0.2626229	AJ537578	Q861B1	AJ537578	Hs.656020	adipose tissue| blood| brain| embryonic tissue| eye| larynx| lung| mammary gland| mouth| ovary| pharynx| placenta| testis| uterus| breast (mammary gland) tumor| head and neck tumor| leukemia| lymphoma| normal| ovarian tumor| uterine tumor|embryoid body| fetus| adult	AJ537578	GO:0001916	positive regulation of T cell mediated cytotoxicity	inferred from electronic annotation	AJ537578	GO:0000139	Golgi membrane	traceable author statement	AJ537578	GO:0005102	receptor binding	not recorded	AJ537578	GenMAPP	Proteasome_Degradation					2.68705	2.54925	2.27067	2.33011
TC11003002.hg.1	5.82292	5.42562	1.31704	up	0.000518999	0.0613018	TH	M24790	tyrosine hydroxylase	protein_coding	chr11	-	M24790	2191909	2193035	30	11p15.5	7054	M24790	NONCODE	accn=M24790 class=mRNAlike lncRNA name=NULL ref=H-invitational v7.5 transcriptId=HIT000194956 cpcScore=0.8033130 cnci=-0.1107541	M24790	P78428	M24790	Hs.435609	adrenal gland| brain| embryonic tissue| eye| mouth| nerve| pancreas| placenta| head and neck tumor| normal| primitive neuroectodermal tumor of the CNS| blastocyst| fetus| juvenile| adult	M24790	GO:0001666	response to hypoxia	inferred from direct assay	M24790	GO:0005634	nucleus	inferred from sequence or structural similarity	M24790	GO:0004511	tyrosine 3-monooxygenase activity	inferred from direct assay	M24790	GenMAPP	Biogenic_Amine_Synthesis					5.85896	5.78662	5.84465	5.80146
TC09001714.hg.1	4.57684	4.22742	1.27405	up	0.000519261	0.0613018	PPP1R26-AS1	AK096249	PPP1R26 antisense RNA 1	antisense	chr9	-	AK096249	138363011	138372564	30		100506599	AK096249	GenBank	Homo sapiens cDNA FLJ38930 fis, clone NT2NE2013081.			AK096249	Hs.561897	intestine| testis| colorectal tumor| germ cell tumor| normal| soft tissue/muscle tissue tumor| adult																				4.55145	4.63221	4.58495	4.53874
TC08000030.hg.1	5.18556	4.70364	1.3966	up	0.000520403	0.0613295	FAM90A14P	NM_001164452	family with sequence similarity 90, member A14, pseudogene	pseudogene	chr8	+	NM_001164452	7137292	7140302	40	8p23.1	645651	NM_001164452	RefSeq	[retired] Homo sapiens family with sequence similarity 90, member A14 (FAM90A14), mRNA.																									5.0089	5.20714	5.33907	5.18713
TC02003263.hg.1	2.66218	3.50064	-1.78815	down	0.000523832	0.0616245	linc-PEX13	TCONS_00002901-XLOC_001489		ncRNA	chr2	+		61159963	61163467	30			TCONS_00002901-XLOC_001489	Rinn lincRNA	linc-PEX13 chr2:+:61159962-61163467																									2.42271	2.96483	2.64162	2.61955
TC02001326.hg.1	8.7029	6.61433	4.25326	up	0.000524756	0.0616245	DES	NM_001927	desmin	protein_coding	chr2	+	NM_001927	220283099	220291461	122	2q35	1674	NM_001927	RefSeq	Homo sapiens desmin (DES), mRNA.	NM_001927	P17661	NM_001927	Hs.594952	adipose tissue| ascites| bladder| blood| bone| bone marrow| brain| cervix| connective tissue| embryonic tissue| esophagus| eye| heart| intestine| kidney| larynx| liver| lung| lymph| mammary gland| mouth| muscle| nerve| ovary| pancreas| pharynx| placenta| prostate| skin| stomach| testis| thyroid| trachea| umbilical cord| uterus| vascular| bladder carcinoma| breast (mammary gland) tumor| cervical t…	NM_001927	GO:0006936	muscle contraction	traceable author statement	NM_001927	GO:0005829	cytosol	traceable author statement	NM_001927	GO:0005200	structural constituent of cytoskeleton	traceable author statement	NM_001927	GenMAPP	Striated_muscle_contraction	ENST00000373960	Pfam	IPR001664	Intermediate filament protein	8.40613	8.5562	8.79903	9.05024
TC19002371.hg.1	5.80702	5.41274	1.31428	up	0.000525645	0.0616245	TMEM221	BC039402	transmembrane protein 221	protein_coding	chr19	-	BC039402	17547493	17559118	40	19p13.11	100130519	BC039402	NONCODE	accn=BC039402 class=mRNAlike lncRNA name=NULL ref=H-invitational v7.5 transcriptId=HIT000095669 cpcScore=0.5192000 cnci=-0.1885484	BC039402	A6NGB7	BC039402	Hs.436603	brain| eye| kidney| mammary gland| ovary| stomach| testis| gastrointestinal tumor| germ cell tumor| kidney tumor| normal| ovarian tumor| adult					BC039402	GO:0016021	integral component of membrane	inferred from electronic annotation												5.70979	5.88461	5.71611	5.91756
TC10002574.hg.1	4.35949	3.9833	1.29791	up	0.000530964	0.0621402	LOC101929397	uc001jah.1	uncharacterized LOC101929397	other	chr10	-	uc001jah.1	43169008	43187207	50	10q11.21	101929397	uc001jah.1	NONCODE	accn=NULL class=lncRNA name= ref=UCSCGeneNoncode transcriptId=uc001jah.1 cpcScore=-0.0542308 cnci=-0.2151139																									4.29924	4.38751	4.37067	4.38055
TC10002970.hg.1	4.6712	5.10214	-1.34811	down	0.000532566	0.06222	METTL10	NM_212554	methyltransferase like 10	protein_coding	chr10	-	NM_212554	126436721	126480446	181	10q26.13	399818	NM_212554	RefSeq	Homo sapiens methyltransferase like 10 (METTL10), mRNA.	NM_212554	Q5JPI9	NM_212554	Hs.741365	adrenal gland| ascites| blood| bone| bone marrow| brain| cervix| embryonic tissue| eye| heart| intestine| kidney| liver| lung| lymph node| mammary gland| mouth| muscle| pancreas| placenta| prostate| spleen| testis| uterus| breast (mammary gland) tumor| cervical tumor| chondrosarcoma| colorectal tumor| gastrointestinal tumor| germ cell tumor| head and neck tumor| kidney tumor| leukemia| lung tumor…	NM_212554	GO:0032259	methylation	inferred from electronic annotation	ENST00000368836	GO:0005737	cytoplasm	inferred from electronic annotation	NM_212554	GO:0008168	methyltransferase activity	inferred from electronic annotation				ENST00000368836	Pfam	IPR003358	tRNA (guanine-N-7) methyltransferase	4.69052	4.75345	4.53973	4.7011
TC01001457.hg.1	5.68206	4.91606	1.70055	up	0.00053614	0.0624409	DUSP27	NM_001080426	dual specificity phosphatase 27 (putative)	protein_coding	chr1	+	NM_001080426	167063282	167098402	120	1q22-q24	92235	NM_001080426	RefSeq	Homo sapiens dual specificity phosphatase 27 (putative) (DUSP27), mRNA.	NM_001080426	Q5VZP5	NM_001080426	Hs.632462	brain| heart| intestine| larynx| liver| lung| muscle| ovary| placenta| stomach| testis| thyroid| colorectal tumor| gastrointestinal tumor| normal| ovarian tumor| fetus| adult	NM_001080426	GO:0006470	protein dephosphorylation	not recorded					NM_001080426	GO:0008138	protein tyrosine/serine/threonine phosphatase activity	not recorded				ENST00000271385	Pfam	IPR000340	Dual specificity phosphatase, catalytic domain	5.58642	5.67737	5.66362	5.80083
TC08002097.hg.1	3.36384	2.94353	1.33822	up	0.00053744	0.0624409	linc_luo_1467	linc_luo_1467		ncRNA	chr8	+		127889400	127890077	30			linc_luo_1467	NONCODE	accn=NULL class=lincRNA name=Human lincRNA ref=Scripture Reconstruction LincRNAs By Luo transcriptId=linc_luo_1467 cpcScore=-1.4154300 cnci=-0.2879344																									3.41083	3.47053	3.2026	3.37142
TC07000228.hg.1	6.0132	6.57223	-1.47328	down	0.000537835	0.0624409	7-Sep	NM_001011553	septin 7	other	chr7	+	NM_001011553	35840542	35946715	341	7p14.2	989	NM_001011553	RefSeq	Homo sapiens septin 7 (SEPT7), transcript variant 2, mRNA.	NM_001011553	Q16181	NM_001011553	Hs.191346	adipose tissue| adrenal gland| ascites| bladder| blood| bone| bone marrow| brain| cervix| connective tissue| ear| embryonic tissue| esophagus| eye| heart| intestine| kidney| larynx| liver| lung| lymph| lymph node| mammary gland| mouth| muscle| nerve| ovary| pancreas| parathyroid| pharynx| pituitary gland| placenta| prostate| salivary gland| skin| spleen| stomach| testis| thymus| thyroid| trachea|…	NM_001011553	GO:0000910	cytokinesis	traceable author statement					NM_001011553	GO:0005198	structural molecule activity	traceable author statement				ENST00000350320	Pfam	IPR000038	Cell division protein GTP binding	6.03428	6.0198	5.90975	6.08897
TC01002037.hg.1	1.87643	1.52791	1.27326	up	0.000538195	0.0624409	OR2T1	NM_030904	olfactory receptor, family 2, subfamily T, member 1	protein_coding	chr1	+	NM_030904	248569296	248570405	30	1q44	26696	NM_030904	RefSeq	Homo sapiens olfactory receptor, family 2, subfamily T, member 1 (OR2T1), mRNA.	NM_030904	O43869	NM_030904	Hs.626885		NM_030904	GO:0007186	G-protein coupled receptor signaling pathway	inferred from electronic annotation	NM_030904	GO:0005886	plasma membrane	traceable author statement	NM_030904	GO:0004930	G-protein coupled receptor activity	inferred from electronic annotation				ENST00000366474	Pfam	IPR000276	G protein-coupled receptor, rhodopsin-like	1.77456	1.89972	1.95171	1.87973
TC06001856.hg.1	5.71577	5.18914	1.44056	up	0.000539543	0.0624409	RP11-462G2.2	OTTHUMT00000041136	novel transcript	antisense	chr6	-	OTTHUMT00000041136	71122531	71123653	30			OTTHUMT00000041136	Havana transcript	cdna:all chromosome:VEGA56:6:70412828:70413950:-1 Gene:OTTHUMG00000014990			ENST00000448363	Hs.669000	kidney| prostate| testis| normal| adult																				5.74413	5.58492	5.83902	5.695
TC05003400.hg.1	5.01667	5.42472	-1.32689	down	0.000542368	0.0624409	DDX46	NM_014829	DEAD (Asp-Glu-Ala-Asp) box polypeptide 46	protein_coding	chr5	+	NM_014829	134094461	134166828	418	5q31.1	9879	NM_014829	RefSeq	Homo sapiens DEAD (Asp-Glu-Ala-Asp) box polypeptide 46 (DDX46), mRNA.	NM_014829	Q7L014	NM_014829	Hs.406549	adrenal gland| ascites| bladder| blood| bone| bone marrow| brain| cervix| connective tissue| embryonic tissue| esophagus| eye| heart| intestine| kidney| larynx| liver| lung| lymph node| mammary gland| mouth| muscle| nerve| ovary| pancreas| pharynx| pituitary gland| placenta| prostate| skin| spleen| stomach| testis| thymus| thyroid| trachea| uterus| vascular|adrenal tumor| bladder carcinoma| breas…	NM_014829	GO:0006200	ATP catabolic process	inferred from electronic annotation	NM_014829	GO:0005634	nucleus	inferred from direct assay	NM_014829	GO:0005524	ATP binding	inferred from electronic annotation				ENST00000354283	Pfam	IPR001650	Helicase, C-terminal	5.02741	5.04743	4.9638	5.02803
TC09001325.hg.1	5.43191	6.24152	-1.75274	down	0.000542551	0.0624409	NFIL3	NM_005384	nuclear factor, interleukin 3 regulated	protein_coding	chr9	-	NM_005384	94171327	94186144	59	9q22	4783	NM_005384	RefSeq	Homo sapiens nuclear factor, interleukin 3 regulated (NFIL3), transcript variant 3, mRNA.	NM_005384	Q16649	NM_005384	Hs.79334	adipose tissue| ascites| blood| bone| brain| cervix| connective tissue| esophagus| eye| heart| intestine| kidney| larynx| liver| lung| lymph node| mammary gland| muscle| nerve| ovary| pancreas| parathyroid| pituitary gland| placenta| prostate| skin| stomach| testis| uterus| vascular| bladder carcinoma| breast (mammary gland) tumor| cervical tumor| chondrosarcoma| esophageal tumor| gastrointestina…	NM_005384	GO:0000122	negative regulation of transcription from RNA polymerase II promoter	inferred from mutant phenotype	NM_005384	GO:0005634	nucleus	inferred from electronic annotation	NM_005384	GO:0000977	RNA polymerase II regulatory region sequence-specific DNA binding	inferred from direct assay				ENST00000297689	Pfam	IPR004827	Basic-leucine zipper domain	5.32122	5.40978	5.35772	5.63891
TC03000666.hg.1	2.42089	2.98866	-1.48223	down	0.000543527	0.0624409	AC023593.1	ENST00000408486		miRNA	chr3	+		127383547	127383653	30			ENST00000408486	ENSEMBL	ncrna:novel chromosome:GRCh38:3:127664704:127664810:1 gene:ENSG00000221413 gene_biotype:miRNA transcript_biotype:miRNA																									2.38831	2.51638	2.38126	2.39761
TC02001322.hg.1	4.74953	4.37681	1.29479	up	0.000547283	0.0624409	TUBA4B	NR_003063	tubulin, alpha 4b (pseudogene)	protein_coding	chr2	+	NR_003063	220117965	220136910	79	2q35	80086	NR_003063	RefSeq	Homo sapiens tubulin, alpha 4b (pseudogene) (TUBA4B), non-coding RNA.	NR_003063	Q9H853	NR_003063	Hs.664469	brain| eye| lung| lymph| muscle| pharynx| placenta| salivary gland| stomach| testis| gastrointestinal tumor| germ cell tumor| head and neck tumor| lymphoma| normal| retinoblastoma| soft tissue/muscle tissue tumor| adult	NR_003063	GO:0007017	microtubule-based process	inferred from electronic annotation	NR_003063	GO:0005737	cytoplasm	inferred from electronic annotation	NR_003063	GO:0005200	structural constituent of cytoskeleton	inferred from electronic annotation								4.63369	4.664	4.92043	4.78
TC04000911.hg.1	4.12159	3.67186	1.36578	up	0.000549345	0.0624409	snoU13.360	ENST00000459026		other	chr4	+		186867237	186867340	30			ENST00000459026	ENSEMBL	[retired]ncrna:snoRNA chromosome:GRCh37:4:186867237:186867340:1 gene:ENSG00000239034 gene_biotype:snoRNA transcript_biotype:snoRNA																									4.01896	4.28424	4.12409	4.05905
TC14002179.hg.1	5.67938	5.33002	1.274	up	0.000549418	0.0624409	uc001you.1	uc001you.1		ncRNA	chr14	-		104975962	104978198	30			uc001you.1	NONCODE	accn=NULL class=lncRNA name= ref=UCSCGeneNoncode transcriptId=uc001you.1 cpcScore=1.7589600 cnci=-0.1306961																									5.55426	5.74604	5.65108	5.76613
TC15001945.hg.1	3.38605	2.57393	1.75578	up	0.000551637	0.0624409	DQ584667	DQ584667	Homo sapiens piRNA piR-51779, complete sequence.	other	chr15	-		97321838	97321867	6			DQ584667	GenBank	Homo sapiens piRNA piR-51779, complete sequence.																									3.32249	3.66704	3.32689	3.22778
TC07002418.hg.1	4.24509	3.75246	1.40701	up	0.000553514	0.0624409	uc003uey.1	uc003uey.1		ncRNA	chr7	+		75935609	75937653	30			uc003uey.1	NONCODE	accn=NULL class=lncRNA name= ref=UCSCGeneNoncode transcriptId=uc003uey.1 cpcScore=0.1973770 cnci=-0.1929499																									4.38382	4.12562	4.35025	4.12067
TC10002806.hg.1	3.56759	2.9634	1.52013	up	0.000553813	0.0624409	linc-LBX1-2	TCONS_00018033-XLOC_008924		ncRNA	chr10	-		103082400	103082763	30			TCONS_00018033-XLOC_008924	Rinn lincRNA	linc-LBX1-2 chr10:-:103082399-103082763																									3.386	3.44387	3.66661	3.77389
TC01005229.hg.1	5.3508	4.84273	1.42214	up	0.000555593	0.0624409	linc-MMEL1-2	TCONS_00000458-XLOC_000681		ncRNA	chr1	-		2730997	2731563	30			TCONS_00000458-XLOC_000681	Rinn lincRNA	linc-MMEL1-2 chr1:-:2730996-2731563																									5.40764	5.30943	5.34298	5.34314
TC01002567.hg.1	4.86479	4.46518	1.31915	up	0.000555777	0.0624409	EDN2	NM_001956	endothelin 2	protein_coding	chr1	-	NM_001956	41944446	41950344	123	1p34	1907	NM_001956	RefSeq	Homo sapiens endothelin 2 (EDN2), mRNA.	NM_001956	P20800	NM_001956	Hs.1407	heart| kidney| lung| mammary gland| lung tumor| normal| fetus| adult					NM_001956	GO:0005576	extracellular region	traceable author statement	NM_001956	GO:0005179	hormone activity	inferred from direct assay				ENST00000372587	Pfam	IPR001928	Endothelin-like toxin	4.74339	4.86172	4.98833	4.86573
TC22000030.hg.1	3.16989	2.7837	1.30694	up	0.000557418	0.0624409	LOC729461	AK302545	uncharacterized LOC729461	protein_coding	chr22	+	AK302545	18721397	18745407	97	22q11.21	729461	AK302545	GenBank	Homo sapiens cDNA FLJ61480 complete cds.	AK302545	B4DYQ5	AK302545	Hs.629498	embryonic tissue| testis| normal| fetus																ENST00000342888	Pfam	IPR019524	Ret-finger protein-like 3 antisense	3.05758	3.31233	3.10144	3.20823
TC02002342.hg.1	4.10674	3.59888	1.42194	up	0.000557861	0.0624409	TISP43	NR_027313	uncharacterized LOC150527	protein_coding	chr2	-	NR_027313	131294143	131307488	60	2q21.1	150527	NR_027313	RefSeq	Homo sapiens uncharacterized LOC150527 (TISP43), transcript variant 1, non-coding RNA.	NR_027313	B9A019	NR_027313	Hs.125706	brain| testis| normal| fetus| adult	NR_027313	GO:0006508	proteolysis	inferred from electronic annotation					NR_027313	GO:0003824	catalytic activity	inferred from electronic annotation				OTTHUMT00000333313	Pfam	IPR001254	Peptidase S1	3.92152	4.29451	4.22342	3.98752
TC05002357.hg.1	3.07759	2.64265	1.35185	up	0.000558159	0.0624409	linc-NNT-2	TCONS_l2_00023383-XLOC_l2_011566		ncRNA	chr5	+		43336266	43348818	30			TCONS_l2_00023383-XLOC_l2_011566	Broad TUCP	linc-NNT-2 chr5:+:43336265-43348818																									3.14925	3.05628	3.21047	2.89435
TC01000036.hg.1	5.47337	5.14721	1.25367	up	0.000558418	0.0624409	LOC148413	NR_015434	uncharacterized LOC148413	ncRNA	chr1	+	NR_015434	1334902	1337426	90	1p36.33	148413	NR_015434	RefSeq	Homo sapiens uncharacterized LOC148413 (LOC148413), long non-coding RNA.	NR_015434	B4DNA4	NR_015434	Hs.741357	ascites| blood| bone| bone marrow| brain| cervix| connective tissue| embryonic tissue| esophagus| eye| heart| intestine| kidney| liver| lung| lymph| lymph node| mammary gland| mouth| muscle| ovary| pancreas| pharynx| placenta| prostate| salivary gland| skin| spleen| testis| thymus| umbilical cord| uterus| vascular| bladder carcinoma| breast (mammary gland) tumor| cervical tumor| chondrosarcoma| c…																				5.386	5.52401	5.57135	5.41212
TC15001357.hg.1	5.73164	6.3283	-1.51221	down	0.000559488	0.0624409	TRPM7	NM_017672	transient receptor potential cation channel, subfamily M, member 7	protein_coding	chr15	-	NM_017672	50849352	50979012	442	15q21	54822	NM_017672	RefSeq	Homo sapiens transient receptor potential cation channel, subfamily M, member 7 (TRPM7), mRNA.	NM_017672	Q96QT4	NM_017672	Hs.512894	adipose tissue| adrenal gland| bladder| blood| bone| bone marrow| brain| cervix| connective tissue| embryonic tissue| esophagus| eye| heart| intestine| kidney| liver| lung| lymph node| mammary gland| mouth| muscle| nerve| ovary| parathyroid| pharynx| pituitary gland| placenta| prostate| skin| stomach| testis| thymus| thyroid| trachea| uterus| vascular|adrenal tumor| breast (mammary gland) tumor| …	NM_017672	GO:0016340	calcium-dependent cell-matrix adhesion	inferred from electronic annotation	NM_017672	GO:0001726	ruffle	inferred from electronic annotation	NM_017672	GO:0003779	actin binding	inferred from electronic annotation				ENST00000313478	Pfam	IPR004166	MHCK/EF2 kinase	5.89705	5.75852	5.6557	5.6153
TC02000653.hg.1	5.52047	5.0292	1.40568	up	0.000561117	0.0624409	CD8B	ENST00000416057	CD8b molecule	protein_coding	chr2	+	ENST00000416057	107103885	107120781	50	2p12	926	ENST00000416057	ENSEMBL	havana:known chromosome:GRCh38:2:106487429:106504325:1 gene:ENSG00000254126 gene_biotype:transcribed_unprocessed_pseudogene transcript_biotype:processed_transcript	ENST00000416057	P10966	ENST00000416057	Hs.405667	blood| connective tissue| eye| intestine| kidney| lung| lymph node| ovary| pancreas| pharynx| pituitary gland| testis| thymus| trachea| chondrosarcoma| germ cell tumor| lung tumor| normal| ovarian tumor| soft tissue/muscle tissue tumor| fetus| adult	ENST00000416057	GO:0006955	immune response	non-traceable author statement	ENST00000416057	GO:0005576	extracellular region	inferred from electronic annotation	ENST00000416057	GO:0005515	protein binding	inferred from physical interaction								5.42912	5.56297	5.58537	5.50444
TC06003643.hg.1	3.79527	3.39245	1.32209	up	0.000564879	0.0624409	ADCY10P1	OTTHUMT00000040502	soluble adenylyl cyclase (SAC) pseudogene	pseudogene	chr6	-	OTTHUMT00000040502	41215572	41216548	40			OTTHUMT00000040502	NONCODE	accn=NULL class=mRNAlike lncRNA name=vega lncRNA ref=GENCODE transcriptId=OTTHUMT00000040502 cpcScore=-1.1011100 cnci=-0.3407564 gene:OTTHUMG00000014668																									3.68855	3.85867	3.82357	3.8103
TC0X001429.hg.1	5.00385	5.64663	-1.56133	down	0.00056585	0.0624409	ATP11C	NM_001010986	ATPase, class VI, type 11C	protein_coding	chrX	-	NM_001010986	138808505	139027435	430	Xq27.1	286410	NM_001010986	RefSeq	Homo sapiens ATPase, class VI, type 11C (ATP11C), transcript variant 2, mRNA.	NM_001010986	Q8NB49	NM_001010986	Hs.88252	adipose tissue| bladder| bone| bone marrow| brain| connective tissue| ear| embryonic tissue| eye| heart| intestine| kidney| larynx| liver| lung| lymph node| mammary gland| mouth| muscle| ovary| pancreas| parathyroid| placenta| prostate| skin| testis| thymus| thyroid| trachea| uterus| chondrosarcoma| colorectal tumor| gastrointestinal tumor| germ cell tumor| head and neck tumor| kidney tumor| live…	NM_001010986	GO:0006812	cation transport	inferred from electronic annotation	NM_001010986	GO:0005765	lysosomal membrane	inferred from direct assay	NM_001010986	GO:0000287	magnesium ion binding	inferred from electronic annotation				ENST00000361648	Pfam	IPR008250	P-type ATPase, A domain	5.04295	5.07153	5.03553	4.86541
TC05002625.hg.1	3.61596	3.23962	1.29804	up	0.000568144	0.0624409	linc-TCF7-3	TCONS_00010095-XLOC_004554		ncRNA	chr5	+		133135104	133156483	43			TCONS_00010095-XLOC_004554	Rinn lincRNA	linc-TCF7-3 chr5:+:133135129-133136073																									3.64795	3.65973	3.49811	3.65805
TC01004659.hg.1	5.0645	5.63177	-1.48172	down	0.000568382	0.0624409	linc_luo_1006	linc_luo_1006		ncRNA	chr1	+		118069961	118071491	30			linc_luo_1006	NONCODE	accn=NULL class=lincRNA name=Human lincRNA ref=Scripture Reconstruction LincRNAs By Luo transcriptId=linc_luo_1006 cpcScore=-1.3406200 cnci=-0.3957361																									4.97428	4.98991	5.24407	5.04973
TC11001260.hg.1	6.16055	5.67866	1.39657	up	0.000568937	0.0624409	DUSP8	NM_004420	dual specificity phosphatase 8	protein_coding	chr11	-	NM_004420	1575274	1593459	120	11p15.5	1850	NM_004420	RefSeq	Homo sapiens dual specificity phosphatase 8 (DUSP8), mRNA.	NM_004420	Q13202	NM_004420	Hs.41688	blood| brain| connective tissue| eye| intestine| kidney| liver| lung| mammary gland| pancreas| prostate| skin| stomach| testis| uterus| breast (mammary gland) tumor| colorectal tumor| gastrointestinal tumor| glioma| leukemia| liver tumor| lung tumor| normal| pancreatic tumor| primitive neuroectodermal tumor of the CNS| prostate cancer| retinoblastoma| skin tumor| uterine tumor| fetus| infant| adu…	NM_004420	GO:0000188	inactivation of MAPK activity	traceable author statement	NM_004420	GO:0005634	nucleus	not recorded	NM_004420	GO:0004725	protein tyrosine phosphatase activity	inferred from electronic annotation				ENST00000331588	Pfam	IPR000340	Dual specificity phosphatase, catalytic domain	5.99073	6.21824	6.05292	6.38029
TC11001363.hg.1	6.29774	5.62108	1.59843	up	0.000569074	0.0624409	DCHS1	NM_003737	dachsous cadherin-related 1	protein_coding	chr11	-	NM_003737	6642554	6677085	250	11p15.4	8642	NM_003737	RefSeq	Homo sapiens dachsous cadherin-related 1 (DCHS1), mRNA.	NM_003737	Q96JQ0	NM_003737	Hs.199850	adipose tissue| adrenal gland| blood| brain| connective tissue| embryonic tissue| eye| heart| intestine| kidney| lung| mammary gland| mouth| nerve| ovary| pancreas| placenta| prostate| skin| spleen| stomach| testis| thymus| thyroid| uterus|adrenal tumor| breast (mammary gland) tumor| chondrosarcoma| colorectal tumor| gastrointestinal tumor| germ cell tumor| glioma| head and neck tumor| kidney tum…	NM_003737	GO:0007156	homophilic cell adhesion	inferred from electronic annotation	NM_003737	GO:0005886	plasma membrane	inferred from electronic annotation	NM_003737	GO:0005509	calcium ion binding	inferred from electronic annotation				ENST00000299441	Pfam	IPR002126	Cadherin	6.25993	6.13305	6.3443	6.4537
TC08000029.hg.1	5.11857	4.64743	1.3862	up	0.000570025	0.0624409	FAM90A14P	NM_001164452	family with sequence similarity 90, member A14, pseudogene	pseudogene	chr8	+	NM_001164452	7114426	7117436	40	8p23.1	645651	NM_001164452	RefSeq	[retired] Homo sapiens family with sequence similarity 90, member A14 (FAM90A14), mRNA.																									4.94157	5.12572	5.2653	5.14167
TC16000847.hg.1	1.15277	1.55505	-1.3216	down	0.000571733	0.0624409	AC093515.1	ENST00000410177		miRNA	chr16	-		7949340	7949433	30			ENST00000410177	ENSEMBL	ncrna:novel chromosome:GRCh38:16:7899338:7899431:-1 gene:ENSG00000222109 gene_biotype:miRNA transcript_biotype:miRNA																									1.1649	1.20157	1.1782	1.06641
TC19001120.hg.1	5.25066	4.85542	1.31516	up	0.000571937	0.0624409	LYPLA2P2	NR_033250	lysophospholipase II pseudogene 2	pseudogene	chr19	-	NR_033250	7943517	7945117	30	19p13.2	388499	NR_033250	RefSeq	Homo sapiens lysophospholipase II pseudogene 2 (LYPLA2P2), non-coding RNA.	NR_033250	O95372	NR_033250	Hs.730360	embryonic tissue| normal|embryoid body	NR_033250	GO:0006629	lipid metabolic process	inferred from electronic annotation	NR_033250	GO:0005737	cytoplasm	inferred from electronic annotation	NR_033250	GO:0016787	hydrolase activity	inferred from electronic annotation								5.20657	5.07244	5.26954	5.45409
TC13000621.hg.1	4.0528	3.73816	1.24369	up	0.000572397	0.0624409	TUSC8	ENST00000432701	tumor suppressor candidate 8 (non-protein coding)	ncRNA	chr13	-	ENST00000432701	44974386	44980021	30	13q14.11	400128	ENST00000432701	ENSEMBL	havana:known chromosome:GRCh38:13:44400250:44405885:-1 gene:ENSG00000237361 gene_biotype:lincRNA transcript_biotype:lincRNA			ENST00000432701	Hs.438480	lung| mammary gland| nerve| thymus| lung tumor| normal| fetus| adult																				3.97214	4.0454	4.10478	4.08886
TC04000583.hg.1	4.85785	5.51372	-1.57557	down	0.000573129	0.0624409	LARP7	NM_015454	La ribonucleoprotein domain family, member 7	protein_coding	chr4	+	NM_015454	113558120	113578748	347	4q25	51574	NM_015454	RefSeq	Homo sapiens La ribonucleoprotein domain family, member 7 (LARP7), transcript variant 2, mRNA.	NM_015454	Q4G0J3	NM_015454	Hs.713663	adrenal gland| ascites| bladder| blood| bone| bone marrow| brain| cervix| connective tissue| embryonic tissue| esophagus| eye| heart| intestine| kidney| larynx| liver| lung| lymph node| mammary gland| muscle| ovary| pancreas| parathyroid| pharynx| pituitary gland| placenta| prostate| salivary gland| skin| spleen| stomach| testis| thymus| thyroid| trachea| umbilical cord| uterus| vascular| bladder…	NM_015454	GO:0006396	RNA processing	inferred from electronic annotation	NM_015454	GO:0005634	nucleus	inferred from direct assay	NM_015454	GO:0000166	nucleotide binding	inferred from electronic annotation				ENST00000324052	Pfam	IPR000504	RNA recognition motif domain	4.87876	4.74486	4.83269	4.97511
TC03000774.hg.1	5.26251	5.90125	-1.55697	down	0.000574314	0.0624409	U2SURP	NM_001080415	U2 snRNP-associated SURP domain containing	protein_coding	chr3	+	NM_001080415	142720010	142779567	454	3q23	23350	NM_001080415	RefSeq	Homo sapiens U2 snRNP-associated SURP domain containing (U2SURP), mRNA.	NM_001080415	O15042	NM_001080415	Hs.596572	adipose tissue| adrenal gland| ascites| bladder| blood| bone| bone marrow| brain| cervix| connective tissue| ear| embryonic tissue| esophagus| eye| heart| intestine| kidney| liver| lung| lymph| lymph node| mammary gland| mouth| muscle| nerve| ovary| pancreas| pharynx| pituitary gland| placenta| prostate| salivary gland| skin| spleen| stomach| testis| thymus| thyroid| trachea| uterus| vascular|adr…	NM_001080415	GO:0006396	RNA processing	inferred from electronic annotation	NM_001080415	GO:0005634	nucleus	inferred from direct assay	NM_001080415	GO:0000166	nucleotide binding	inferred from electronic annotation				ENST00000473835	Pfam	IPR000061	SWAP/Surp	5.30564	5.3316	5.16184	5.25096
TC08000976.hg.1	3.14426	2.72133	1.34064	up	0.000574976	0.0624409	RP11-148O21.3	ENST00000527922		antisense	chr8	-		11410733	11411716	30			ENST00000527922	ENSEMBL	havana:known chromosome:GRCh38:8:11553224:11554207:-1 gene:ENSG00000254774 gene_biotype:antisense transcript_biotype:antisense			ENST00000527922	Hs.613094	brain| salivary gland| glioma| normal																				3.13694	3.06186	3.17915	3.19908
TC09001014.hg.1	4.53984	4.87228	-1.25914	down	0.000575497	0.0624409	SUGT1P1	NR_003667	SUGT1 pseudogene 1	pseudogene	chr9	-	NR_003667	33504535	33511164	50	9p13.3	441394	NR_003667	RefSeq	Homo sapiens SUGT1 pseudogene 1 (SUGT1P1), non-coding RNA.			NR_003667	Hs.521441	brain| embryonic tissue| lung| lymph node| muscle| testis| thymus| trachea| lung tumor| normal|embryoid body| fetus| adult																				4.5851	4.63334	4.47464	4.46628
TC07002368.hg.1	3.9118	4.96527	-2.07553	down	0.000578957	0.0624409	ZNF107	AB014735	zinc finger protein 107	protein_coding	chr7	+	AB014735	64167992	64168490	30	7q11.2	51427	AB014735	NONCODE	accn=AB014735 class=mRNAlike lncRNA name=NULL ref=H-invitational v7.5 transcriptId=HIT000058374 cpcScore=3.1450700 cnci=-0.3333174	AB014735	Q9H3U2	AB014735	Hs.732661	bladder| bone| brain| connective tissue| embryonic tissue| eye| heart| intestine| kidney| liver| lung| lymph| lymph node| mammary gland| mouth| muscle| nerve| ovary| prostate| testis| thymus| trachea| uterus| breast (mammary gland) tumor| colorectal tumor| germ cell tumor| head and neck tumor| kidney tumor| lymphoma| non-neoplasia| normal| ovarian tumor| uterine tumor|embryoid body| blastocyst| f…	AB014735	GO:0006351	transcription, DNA-templated	inferred from electronic annotation	AB014735	GO:0005634	nucleus	inferred from electronic annotation	AB014735	GO:0003677	DNA binding	inferred from electronic annotation								4.25765	4.23043	3.54463	3.61447
TC20001262.hg.1	3.50843	3.16681	1.26718	up	0.000579124	0.0624409	AK126019	AK126019		ncRNA	chr20	+		47099591	47107082	138			AK126019	NONCODE	accn=AK126019 class=mRNAlike lncRNA name=Human lncRNA ref=JounralRNA transcriptId=2158 cpcScore=-0.8417210 cnci=-0.2062137			AK126019	Hs.738705	testis| normal																				3.35873	3.54864	3.56528	3.56108
TC02003764.hg.1	2.13273	2.59458	-1.3773	down	0.000579285	0.0624409	AF086164	AF086164		ncRNA	chr2	+		201691498	201692050	30			AF086164	NONCODE	accn=AF086164 class=mRNAlike lncRNA name=Human lncRNA ref=JounralRNA transcriptId=1517 cpcScore=-1.3862200 cnci=-0.4521025			AF086164	Hs.102941	connective tissue| intestine| pancreas| prostate| skin| colorectal tumor| non-neoplasia| normal| prostate cancer| fetus| adult																				1.93987	2.24478	2.33577	2.01051
TC01004487.hg.1	3.5893	4.14854	-1.47349	down	0.000579431	0.0624409	linc-AK5-2	TCONS_00000237-XLOC_000262		ncRNA	chr1	+		77533605	77544167	40			TCONS_00000237-XLOC_000262	Rinn lincRNA	linc-AK5-2 chr1:+:77533604-77544167																									3.48733	3.5692	3.65525	3.64542
TC11003014.hg.1	4.43983	4.81299	-1.29519	down	0.000580238	0.0624409	linc_luo_1987	linc_luo_1987		ncRNA	chr11	-		3402159	3404792	30			linc_luo_1987	NONCODE	accn=NULL class=lincRNA name=Human lincRNA ref=Scripture Reconstruction LincRNAs By Luo transcriptId=linc_luo_1987 cpcScore=-1.4132100 cnci=-0.2867260																									4.56537	4.46088	4.29141	4.44168
TC10000560.hg.1	3.89918	3.55707	1.26761	up	0.000581612	0.0624409	LINC00595	ENST00000415959	long intergenic non-protein coding RNA 595	ncRNA	chr10	+	ENST00000415959	80027085	80159502	115	10q22.3	414243	ENST00000415959	ENSEMBL	havana:known chromosome:GRCh38:10:78267328:78278065:1 gene:ENSG00000227136 gene_biotype:lincRNA transcript_biotype:lincRNA	AK126491	B4DGB9	AK126491	Hs.55047	ascites| bone| brain| connective tissue| eye| prostate| testis| uterus| chondrosarcoma| gastrointestinal tumor| germ cell tumor| non-neoplasia| normal| primitive neuroectodermal tumor of the CNS| soft tissue/muscle tissue tumor| fetus| adult																				3.8134	3.95521	3.87619	3.95193
TC15001464.hg.1	6.11842	6.7848	-1.58709	down	0.00058188	0.0624409	RSL24D1	NM_016304	ribosomal L24 domain containing 1	protein_coding	chr15	-	NM_016304	55473004	55489265	140	15q21	51187	NM_016304	RefSeq	Homo sapiens ribosomal L24 domain containing 1 (RSL24D1), mRNA.	NM_016304	Q9UHA3	NM_016304	Hs.274772	adrenal gland| bladder| blood| bone| bone marrow| brain| cervix| connective tissue| embryonic tissue| eye| heart| intestine| kidney| liver| lung| lymph| lymph node| mammary gland| mouth| muscle| nerve| ovary| pancreas| parathyroid| pharynx| pituitary gland| placenta| prostate| salivary gland| skin| spleen| testis| thymus| thyroid| umbilical cord| uterus| vascular|adrenal tumor| bladder carcinoma|…	NM_016304	GO:0042254	ribosome biogenesis	inferred from electronic annotation	NM_016304	GO:0005730	nucleolus	inferred from electronic annotation								ENST00000260443	Pfam	IPR000988	Ribosomal protein L24e-related	6.0598	6.28518	5.99289	6.13581
TC12000866.hg.1	3.27247	2.62948	1.56157	up	0.000582794	0.0624409	RNA5SP373	ENST00000517271	RNA, 5S ribosomal pseudogene 373	rRNA	chr12	+	ENST00000517271	111777331	111777425	30			ENST00000517271	ENSEMBL	ncrna:known chromosome:GRCh38:12:111339527:111339621:1 gene:ENSG00000253080 gene_biotype:rRNA transcript_biotype:rRNA																									3.04306	3.19945	3.58341	3.26397
TC02002950.hg.1	3.06006	3.58251	-1.4364	down	0.000583728	0.0624409	AC005104.3	OTTHUMT00000323240	putative novel transcript	antisense	chr2	-	OTTHUMT00000323240	242290755	242292519	30			OTTHUMT00000323240	Havana transcript	cdna:all chromosome:VEGA56:2:241351340:241353104:-1 Gene:OTTHUMG00000151587																									3.01233	3.14969	2.93301	3.14519
TC07000495.hg.1	6.08801	6.67885	-1.50613	down	0.000585717	0.0624409	PTPN12	NM_001131008	protein tyrosine phosphatase, non-receptor type 12	protein_coding	chr7	+	NM_001131008	77166415	77269388	476	7q11.23	5782	NM_001131008	RefSeq	Homo sapiens protein tyrosine phosphatase, non-receptor type 12 (PTPN12), transcript variant 2, mRNA.	NM_001131008	Q05209	NM_001131008	Hs.61812	adipose tissue| adrenal gland| bladder| blood| bone| bone marrow| brain| cervix| connective tissue| ear| embryonic tissue| esophagus| eye| heart| intestine| kidney| liver| lung| lymph node| mammary gland| mouth| muscle| nerve| ovary| pancreas| pituitary gland| placenta| prostate| salivary gland| skin| spleen| stomach| testis| thymus| thyroid| trachea| uterus| vascular|adrenal tumor| breast (mamma…	NM_001131008	GO:0006470	protein dephosphorylation	traceable author statement	NM_001131008	GO:0002102	podosome	inferred from electronic annotation	NM_001131008	GO:0004726	non-membrane spanning protein tyrosine phosphatase activity	traceable author statement				ENST00000248594	Pfam	IPR000242	Protein-tyrosine phosphatase, receptor/non-receptor type	6.2108	6.08545	6.00912	6.04666
TC6_mcf_hap5000137.hg.1	4.89702	4.55016	1.27179	up	0.000586553	0.0624409	NCR3	NM_001145466	natural cytotoxicity triggering receptor 3	protein_coding	chr6_mcf_hap5	-	NM_001145466	2936361	2940463	121	6p21.3	259197	NM_001145466	RefSeq	Homo sapiens natural cytotoxicity triggering receptor 3 (NCR3), transcript variant 2, mRNA.	NM_001145466	O14931	NM_001145466	Hs.509513	blood| brain| lymph node| prostate| spleen| tonsil| glioma| normal| adult	NM_001145466	GO:0006954	inflammatory response	non-traceable author statement	NM_001145466	GO:0005887	integral component of plasma membrane	traceable author statement								OTTHUMT00000312144	Pfam	IPR013106	Immunoglobulin V-set domain	4.88853	4.88581	4.86609	4.94765
TC05001555.hg.1	1.74923	2.54731	-1.73878	down	0.000587537	0.0624409	VCAN-AS1	ENST00000512090	VCAN antisense RNA 1	antisense	chr5	-	ENST00000512090	82827171	82858133	60			ENST00000512090	ENSEMBL	havana:known chromosome:GRCh38:5:83531352:83562314:-1 gene:ENSG00000249835 gene_biotype:antisense transcript_biotype:antisense																									1.85788	1.73111	1.82379	1.58416
TC14000078.hg.1	3.69881	3.36589	1.25956	up	0.000588477	0.0624409	TPPP2	NM_173846	tubulin polymerization-promoting protein family member 2	protein_coding	chr14	+	NM_173846	21498345	21504435	119	14q11.2	122664	NM_173846	RefSeq	Homo sapiens tubulin polymerization-promoting protein family member 2 (TPPP2), mRNA.	NM_173846	P59282	NM_173846	Hs.406966	brain| intestine| kidney| testis| uterus| germ cell tumor| normal| fetus| adult					NM_173846	GO:0005737	cytoplasm	inferred from electronic annotation								ENST00000321760	Pfam	IPR008907	P25-alpha	3.69254	3.6395	3.71366	3.74956
TC08000182.hg.1	6.06878	5.7123	1.28031	up	0.000588918	0.0624409	LOC389641	ENST00000517774	uncharacterized LOC389641	ncRNA	chr8	+	ENST00000517774	23081984	23083395	30	8p21.3	389641	ENST00000517774	ENSEMBL	havana:known chromosome:GRCh38:8:23224471:23225882:1 gene:ENSG00000246582 gene_biotype:processed_transcript transcript_biotype:antisense			ENST00000517774	Hs.591835	intestine| lymph node| ovary| prostate| stomach| gastrointestinal tumor| normal| ovarian tumor| prostate cancer| adult																				6.10567	5.96879	6.07916	6.12152
TC07003389.hg.1	3.69066	4.15501	-1.37969	down	0.000590185	0.0624409	ZNRF2	ENST00000414621	zinc and ring finger 2	protein_coding	chr7	+	ENST00000414621	30402016	30452118	69	7p14.3	223082	ENST00000414621	ENSEMBL	havana:putative chromosome:GRCh38:7:30390908:30412375:1 gene:ENSG00000180233 gene_biotype:protein_coding transcript_biotype:processed_transcript	ENST00000414621	Q8NHG8	ENST00000414621	Hs.263912	adipose tissue| adrenal gland| bladder| blood| bone marrow| brain| cervix| connective tissue| embryonic tissue| eye| intestine| kidney| larynx| liver| lung| lymph node| mammary gland| muscle| ovary| pancreas| placenta| prostate| skin| testis| thymus| thyroid| trachea| vascular| bladder carcinoma| breast (mammary gland) tumor| chondrosarcoma| glioma| head and neck tumor| leukemia| normal| ovarian …	ENST00000414621	GO:0016567	protein ubiquitination	inferred from electronic annotation	ENST00000414621	GO:0005737	cytoplasm	inferred from direct assay	ENST00000414621	GO:0004842	ubiquitin-protein transferase activity	inferred from direct assay								3.77357	3.80192	3.64511	3.54206
TC01001495.hg.1	2.98633	2.46925	1.43105	up	0.000591661	0.0624409	SCARNA20	ENST00000517251		scaRNA	chr1	+		171737210	171737315	30			ENST00000517251	ENSEMBL	ncrna:novel chromosome:GRCh38:1:171768070:171768175:1 gene:ENSG00000253060 gene_biotype:snoRNA transcript_biotype:snoRNA																									3.08721	2.81583	3.05943	2.98285
TC16001743.hg.1	6.06	5.55398	1.42013	up	0.000591843	0.0624409	E4F1	BC001713	E4F transcription factor 1	protein_coding	chr16	-	BC001713	2285690	2286914	30	16p13.3	1877	BC001713	NONCODE	accn=BC001713 class=mRNAlike lncRNA name=Human lncRNA ref=JounralRNA transcriptId=1473 cpcScore=-0.5756840 cnci=-0.0807060	BC001713	Q9BV18	BC001713	Hs.513268	adipose tissue| ascites| blood| bone| bone marrow| brain| cervix| embryonic tissue| eye| heart| intestine| kidney| liver| lung| lymph node| mammary gland| mouth| muscle| nerve| ovary| pancreas| parathyroid| placenta| prostate| skin| stomach| testis| tonsil| uterus| breast (mammary gland) tumor| cervical tumor| chondrosarcoma| colorectal tumor| gastrointestinal tumor| germ cell tumor| glioma| head…	BC001713	GO:0000122	negative regulation of transcription from RNA polymerase II promoter	inferred from direct assay	BC001713	GO:0005634	nucleus	inferred from direct assay	BC001713	GO:0000977	RNA polymerase II regulatory region sequence-specific DNA binding	inferred from direct assay								6.03346	5.96709	6.16422	6.07521
TC09001360.hg.1	2.40327	2.88218	-1.39369	down	0.000593084	0.0624409	MIR3074	NR_036109	microRNA 3074	miRNA	chr9	-	NR_036109	97848296	97848376	30	9q22.32	100422842	NR_036109	RefSeq	Homo sapiens microRNA 3074 (MIR3074), microRNA.																									2.36668	2.45911	2.29952	2.48776
TC13001581.hg.1	1.8652	1.36419	1.4152	up	0.000593385	0.0624409	linc-COMMD6-2	TCONS_00022053-XLOC_010657		ncRNA	chr13	-		77174564	77303640	30			TCONS_00022053-XLOC_010657	Rinn lincRNA	linc-COMMD6-2 chr13:-:77174563-77303640																									2.03754	1.61943	1.95023	1.8536
TC05000327.hg.1	1.56931	2.24835	-1.60108	down	0.000595129	0.0624409	DQ570835	DQ570835	Homo sapiens piRNA piR-30947, complete sequence.	other	chr5	+		70278675	70282294	30			DQ570835	GenBank	Homo sapiens piRNA piR-30947, complete sequence.																									1.68122	1.84673	1.27317	1.4761
TC05000498.hg.1	5.25979	5.91718	-1.57723	down	0.00059578	0.0624409	PPIP5K2	NM_015216	diphosphoinositol pentakisphosphate kinase 2	protein_coding	chr5	+	NM_015216	102455853	102538937	539	5q21.1	23262	NM_015216	RefSeq	Homo sapiens diphosphoinositol pentakisphosphate kinase 2 (PPIP5K2), transcript variant 2, mRNA.	NM_015216	O43314	NM_015216	Hs.212046	bladder| blood| bone| bone marrow| brain| cervix| connective tissue| ear| embryonic tissue| esophagus| eye| heart| intestine| kidney| liver| lung| lymph node| mammary gland| mouth| muscle| ovary| pancreas| pharynx| placenta| prostate| salivary gland| skin| spleen| stomach| testis| thymus| thyroid| trachea| umbilical cord| uterus| vascular| bladder carcinoma| breast (mammary gland) tumor| cervical…	NM_015216	GO:0006020	inositol metabolic process	inferred from sequence or structural similarity	NM_015216	GO:0005829	cytosol	inferred from sequence or structural similarity	NM_015216	GO:0000827	inositol-1,3,4,5,6-pentakisphosphate kinase activity	inferred from sequence or structural similarity	AB007893	MetaCyc	PWY-6369	ENST00000321521	Pfam	IPR000560	Histidine phosphatase superfamily, clade-2	5.38908	5.34607	5.12947	5.17452
TC07001091.hg.1	4.17485	3.78142	1.31351	up	0.000596396	0.0624409	ELFN1-AS1	ENST00000415399	ELFN1 antisense RNA 1	ncRNA	chr7	-	ENST00000415399	1778266	1781927	40	7p22.3	101927125	ENST00000415399	ENSEMBL	havana:known chromosome:GRCh38:7:1738983:1742291:-1 gene:ENSG00000236081 gene_biotype:lincRNA transcript_biotype:lincRNA			ENST00000415399	Hs.635185	intestine| adult																				4.03812	4.10894	4.34649	4.20586
TC06000490.hg.1	5.06445	4.67921	1.30608	up	0.000596691	0.0624409	DQ592096	DQ592096	Homo sapiens piRNA piR-59208, complete sequence.	other	chr6	+		33876731	33876837	30			DQ592096	GenBank	Homo sapiens piRNA piR-59208, complete sequence.																									4.91991	5.00234	5.09038	5.24519
TC04001015.hg.1	5.55915	5.2008	1.28197	up	0.000596701	0.0624409	ABLIM2	NM_001130083	actin binding LIM protein family, member 2	protein_coding	chr4	-	NM_001130083	7967037	8160559	362	4p16.1	84448	NM_001130083	RefSeq	Homo sapiens actin binding LIM protein family, member 2 (ABLIM2), transcript variant 1, mRNA.	NM_001130083	Q6H8Q1	NM_001130083	Hs.233404	brain| cervix| connective tissue| embryonic tissue| eye| heart| intestine| kidney| lung| mammary gland| mouth| muscle| nerve| ovary| pancreas| pharynx| prostate| spleen| testis| thyroid| uterus| vascular| breast (mammary gland) tumor| cervical tumor| chondrosarcoma| colorectal tumor| germ cell tumor| glioma| head and neck tumor| lung tumor| non-neoplasia| normal| ovarian tumor| pancreatic tumor| …	NM_001130083	GO:0006351	transcription, DNA-templated	inferred from electronic annotation	NM_001130083	GO:0015629	actin cytoskeleton	inferred from direct assay	NM_001130083	GO:0003779	actin binding	inferred from electronic annotation				ENST00000318888	Pfam	IPR003128	Villin headpiece	5.51165	5.48958	5.6294	5.60599
TC10002052.hg.1	3.52553	4.10519	-1.49449	down	0.000596778	0.0624409	FAM35BP	NR_027632	family with sequence similarity 35, member A pseudogene	pseudogene	chr10	+	NR_027632	46897641	46939145	70	10q11.22	414241	NR_027632	NONCODE	accn=NR_027632 class=lncRNA name= ref=RefGeneNoncode transcriptId=NR_027632 cpcScore=11.8578000 cnci=-0.3798507			NR_027632	Hs.594331	adrenal gland| ascites| blood| bone marrow| brain| cervix| connective tissue| ear| embryonic tissue| eye| intestine| kidney| liver| lung| mammary gland| mouth| muscle| ovary| pancreas| placenta| prostate| skin| stomach| thyroid| uterus| vascular|adrenal tumor| breast (mammary gland) tumor| cervical tumor| colorectal tumor| gastrointestinal tumor| germ cell tumor| glioma| head and neck tumor| kidn…																				3.61643	3.41809	3.37104	3.69657
TC03003398.hg.1	3.8356	4.46326	-1.54506	down	0.000597686	0.0624409	IFT80	NM_001190241	intraflagellar transport 80 homolog (Chlamydomonas)	protein_coding	chr3	-	NM_001190241	159974774	160117668	444	3q25.33	57560	NM_001190241	RefSeq	Homo sapiens intraflagellar transport 80 (IFT80), transcript variant 2, mRNA.	NM_001190241	Q9P2H3	NM_001190241	Hs.478095	adipose tissue| adrenal gland| bladder| bone| brain| connective tissue| embryonic tissue| esophagus| eye| kidney| liver| lung| lymph node| mammary gland| mouth| muscle| nerve| ovary| pancreas| pituitary gland| placenta| prostate| skin| stomach| testis| thymus| thyroid| trachea| uterus| vascular| breast (mammary gland) tumor| chondrosarcoma| gastrointestinal tumor| germ cell tumor| head and neck t…	NM_001190241	GO:0001649	osteoblast differentiation	inferred from electronic annotation	NM_001190241	GO:0005737	cytoplasm	inferred from electronic annotation	ENST00000326448	GO:0005515	protein binding	inferred from electronic annotation				ENST00000326448	Pfam	IPR001680	WD40 repeat	3.97889	3.76171	3.78409	3.81772
TC01002247.hg.1	4.03663	3.45422	1.49735	up	0.000598471	0.0624409	RP4-680D5.2	OTTHUMT00000006773	novel transcript	antisense	chr1	-	OTTHUMT00000006773	15912631	15930121	30			OTTHUMT00000006773	Havana transcript	cdna:all chromosome:VEGA56:1:15586136:15603626:-1 Gene:OTTHUMG00000002359			ENST00000428945	Hs.638520	brain| liver| liver tumor| non-neoplasia| normal| fetus| adult																				3.83209	4.1228	4.00008	4.19156
TC03003222.hg.1	2.42308	3.02435	-1.51704	down	0.000599764	0.0624409	linc_luo_1157	linc_luo_1157		ncRNA	chr3	-		178670696	178701135	30			linc_luo_1157	NONCODE	accn=NULL class=lincRNA name=Human lincRNA ref=Scripture Reconstruction LincRNAs By Luo transcriptId=linc_luo_1157 cpcScore=-1.3675000 cnci=-0.4221677																									2.6592	2.3667	2.49093	2.1755
TC10001124.hg.1	3.13118	3.58524	-1.36989	down	0.00060026	0.0624409	ANKRD26	NM_001256053	ankyrin repeat domain 26	protein_coding	chr10	-	NM_001256053	27280843	27389427	480	10p12.1	22852	NM_001256053	RefSeq	Homo sapiens ankyrin repeat domain 26 (ANKRD26), transcript variant 2, mRNA.	NM_001256053	Q9UPS8	NM_001256053	Hs.361041	bone| brain| connective tissue| ear| embryonic tissue| esophagus| eye| kidney| liver| lung| lymph| lymph node| mammary gland| muscle| ovary| parathyroid| placenta| testis| thymus| thyroid| trachea| uterus| chondrosarcoma| esophageal tumor| germ cell tumor| glioma| head and neck tumor| liver tumor| lymphoma| normal| primitive neuroectodermal tumor of the CNS| retinoblastoma| soft tissue/muscle tis…	NM_001256053	GO:0019217	regulation of fatty acid metabolic process	inferred from electronic annotation	NM_001256053	GO:0005813	centrosome	inferred from direct assay	ENST00000376087	GO:0005515	protein binding	inferred from electronic annotation				ENST00000376087	Pfam	IPR002110	Ankyrin repeat	3.31798	3.09771	3.04622	3.06281
TC22001496.hg.1	5.26764	4.90965	1.28164	up	0.000600719	0.0624409	DNAL4	NM_005740	dynein, axonemal, light chain 4	protein_coding	chr22	-	NM_005740	39174513	39190203	70	22q13.1	10126	NM_005740	RefSeq	Homo sapiens dynein, axonemal, light chain 4 (DNAL4), mRNA.	NM_005740	O96015	NM_005740	Hs.632766	adipose tissue| adrenal gland| ascites| bone| bone marrow| brain| connective tissue| embryonic tissue| esophagus| eye| heart| intestine| kidney| liver| lung| lymph node| mammary gland| muscle| nerve| ovary| pancreas| placenta| prostate| skin| spleen| testis| thymus| uterus| breast (mammary gland) tumor| chondrosarcoma| colorectal tumor| esophageal tumor| gastrointestinal tumor| germ cell tumor| g…	NM_005740	GO:0007017	microtubule-based process	inferred from electronic annotation	NM_005740	GO:0005737	cytoplasm	inferred from electronic annotation	NM_005740	GO:0003774	motor activity	inferred from electronic annotation				ENST00000216068	Pfam	IPR001372	Dynein light chain, type 1/2	5.2388	5.31287	5.30488	5.214
TC10001176.hg.1	1.8048	1.38305	1.33956	up	0.000601442	0.0624409	RP11-324I22.2	OTTHUMT00000047566	putative novel transcript	ncRNA	chr10	-	OTTHUMT00000047566	35508822	35519526	30			OTTHUMT00000047566	Havana transcript	cdna:all chromosome:VEGA56:10:35219894:35230598:-1 Gene:OTTHUMG00000017954			ENST00000439198	Hs.126160	connective tissue| testis| normal| soft tissue/muscle tissue tumor| fetus| adult																				1.68167	1.92079	1.9203	1.69645
TC05001241.hg.1	4.6618	4.23105	1.34794	up	0.000601769	0.0624409	CTD-2203K17.1	OTTHUMT00000366714	putative novel transcript	antisense	chr5	-	OTTHUMT00000366714	33424131	33440725	30			OTTHUMT00000366714	Havana transcript	cdna:all chromosome:VEGA56:5:33424025:33440619:-1 Gene:OTTHUMG00000162003																									4.47558	4.8097	4.65665	4.70528
TC20000999.hg.1	1.76363	2.08361	-1.24832	down	0.000602198	0.0624409	SYCP2	NM_014258	synaptonemal complex protein 2	protein_coding	chr20	-	NM_014258	58438618	58508710	576	20q13.33	10388	NM_014258	RefSeq	Homo sapiens synaptonemal complex protein 2 (SYCP2), mRNA.	NM_014258	Q9BX26	NM_014258	Hs.202676	blood| bone| brain| connective tissue| eye| heart| kidney| liver| lung| mammary gland| muscle| placenta| prostate| stomach| testis| uterus| breast (mammary gland) tumor| chondrosarcoma| gastrointestinal tumor| kidney tumor| leukemia| non-neoplasia| normal| soft tissue/muscle tissue tumor| uterine tumor| fetus| adult	NM_014258	GO:0007128	meiotic prophase I	non-traceable author statement	NM_014258	GO:0000795	synaptonemal complex	non-traceable author statement	NM_014258	GO:0003677	DNA binding	non-traceable author statement								1.87739	1.73007	1.77468	1.67237
TC06000633.hg.1	5.19532	5.60175	-1.3254	down	0.000603894	0.0624409	CD2AP	NM_012120	CD2-associated protein	protein_coding	chr6	+	NM_012120	47445525	47594999	260	6p12	23607	NM_012120	RefSeq	Homo sapiens CD2-associated protein (CD2AP), mRNA.	NM_012120	Q9Y5K6	NM_012120	Hs.485518	adrenal gland| ascites| bladder| blood| bone| bone marrow| brain| cervix| connective tissue| embryonic tissue| eye| heart| intestine| kidney| liver| lung| lymph node| mammary gland| muscle| ovary| pancreas| placenta| prostate| salivary gland| skin| stomach| testis| thymus| thyroid| trachea| uterus|adrenal tumor| bladder carcinoma| breast (mammary gland) tumor| cervical tumor| chondrosarcoma| colo…	NM_012120	GO:0006461	protein complex assembly	traceable author statement	NM_012120	GO:0001726	ruffle	inferred from direct assay	NM_012120	GO:0005172	vascular endothelial growth factor receptor binding	inferred from electronic annotation				ENST00000359314	Pfam	IPR001452	SH3 domain	5.18838	5.18323	5.1693	5.24038
TC11003261.hg.1	4.04754	3.33678	1.63667	up	0.00060461	0.0624409	linc-PAK1-1	TCONS_00019715-XLOC_009510		ncRNA	chr11	-		77185455	77186106	17			TCONS_00019715-XLOC_009510	Rinn lincRNA	linc-PAK1-1 chr11:-:77185454-77186106																									4.29716	3.81947	4.17709	3.89646
TC05000867.hg.1	2.91742	2.4986	1.33683	up	0.000606382	0.0624409	AC008676.1	ENST00000377571		other	chr5	+		156802749	156811947	30			ENST00000377571	ENSEMBL	[retired] cdna:known chromosome:GRCh37:5:156802749:156811947:1 gene:ENSG00000204823 gene_biotype:protein_coding transcript_biotype:protein_coding																									2.91286	3.12049	2.934	2.70234
TC02003192.hg.1	4.93031	4.45992	1.38549	up	0.000607156	0.0624409	linc-PLEKHH2-3	TCONS_00003661-XLOC_001448		ncRNA	chr2	+		43357103	43358647	17			TCONS_00003661-XLOC_001448	Rinn lincRNA	linc-PLEKHH2-3 chr2:+:43357102-43358647																									4.78855	5.01927	5.03786	4.87556
TC05001725.hg.1	4.66233	5.1794	-1.43105	down	0.000608437	0.0624409	CEP120	NM_001166226	centrosomal protein 120kDa	protein_coding	chr5	-	NM_001166226	122680579	122759286	375	5q23.2	153241	NM_001166226	RefSeq	Homo sapiens centrosomal protein 120kDa (CEP120), transcript variant 2, mRNA.	NM_001166226	Q8N960	NM_001166226	Hs.483209	adipose tissue| bone| bone marrow| brain| connective tissue| embryonic tissue| eye| heart| intestine| kidney| liver| lung| lymph| lymph node| mammary gland| mouth| muscle| pancreas| placenta| prostate| skin| testis| thymus| trachea| uterus| vascular| breast (mammary gland) tumor| chondrosarcoma| colorectal tumor| germ cell tumor| glioma| head and neck tumor| leukemia| liver tumor| lung tumor| lym…	NM_001166226	GO:0021987	cerebral cortex development	inferred from electronic annotation	NM_001166226	GO:0005737	cytoplasm	inferred from electronic annotation	NM_001166226	GO:0008022	protein C-terminus binding	inferred from electronic annotation				ENST00000306467	Pfam	IPR022136	Domain of unknown function DUF3668	4.72143	4.56321	4.68161	4.68306
TC22001310.hg.1	3.59249	3.14295	1.3656	up	0.000608643	0.0624409	linc-BPIL2	TCONS_00029899-XLOC_014351		ncRNA	chr22	-		32904729	32905176	30			TCONS_00029899-XLOC_014351	Rinn lincRNA	linc-BPIL2 chr22:-:32904728-32905176																									3.66317	3.61507	3.71926	3.37245
TC12002882.hg.1	6.89699	6.58082	1.24502	up	0.00061045	0.0624409	linc-FIGNL2-1	TCONS_00020785-XLOC_010078		ncRNA	chr12	-		52233847	52234850	30			TCONS_00020785-XLOC_010078	Rinn lincRNA	linc-FIGNL2-1 chr12:-:52233846-52234850																									6.93011	6.98799	6.88389	6.78596
TC15002496.hg.1	3.54032	2.9616	1.49353	up	0.000611466	0.0624409	linc-PLCB2	TCONS_00023640-XLOC_011441		ncRNA	chr15	-		40609595	40615570	30			TCONS_00023640-XLOC_011441	Rinn lincRNA	linc-PLCB2 chr15:-:40609594-40615570																									3.31948	3.64927	3.5821	3.61044
TC12000282.hg.1	4.08282	3.58256	1.41447	up	0.000612598	0.0624409	LOC645485	ENST00000500076	uncharacterized LOC645485	ncRNA	chr12	+	ENST00000500076	30908008	30933673	30	12p11.21	645485	ENST00000500076	ENSEMBL	havana:known chromosome:GRCh38:12:30755074:30780739:1 gene:ENSG00000246331 gene_biotype:lincRNA transcript_biotype:lincRNA			ENST00000500076	Hs.232332	brain| testis| germ cell tumor| normal| adult																				3.90992	4.0873	4.1019	4.23216
TC11000073.hg.1	5.68486	5.25058	1.35123	up	0.000613285	0.0624409	AC108448.3	OTTHUMT00000032331	novel transcript	antisense	chr11	+	OTTHUMT00000032331	3210776	3211159	30			OTTHUMT00000032331	Havana transcript	cdna:all chromosome:VEGA56:11:3189546:3189929:1 Gene:OTTHUMG00000011701			ENST00000455154	Hs.523432	germ cell tumor																				5.6108	5.63607	5.73144	5.76112
[truncated: 66,871 more rows]
[truncated: 3 more columns]

## Sheet: Differential gene
probset_id	NA	MF	FC	Regulation	P.Value	adj.P.Val	Gene_Symbol	Gene_Id	Gene_Discription	biotype	Chromosome	Strand	Public.Gene.IDs	Start	Stop	total_probes	Cytoband	Entrez.ID	mRNA.Accession	mRNA.Source	mRNA.Description	SwissProt.mRNA.Accession	SwissProt.Accession	UniGene.Accession	UniGene.ID	UniGene.Expression.Information	GO.Biological.Process.Accession	GO.Biological.Process.ID	GO.Biological.Process.Term	GO.Biological.Process.Evidence	GO.Cellular.Component.Accession	GO.Cellular.Component.ID	GO.Cellular.Component.Term	GO.Cellular.Component.Evidence	GO.Melecular.Function.Accession	GO.Molecular.Function.ID	GO.Molecular.Function.Term	GO.Molecular.Function.Evidence	Pathway.Accession	Pathway.Source	Pathway.Name	Protein.Domains.mRNA.Accession	Protein.Domains.Source	Protein.Domains.Accession	Protein.Domains.Description	ZCZDM1	ZCZDM2	ZCZDM3	ZCZDM4
[truncated: 1,517 more rows]
[truncated: 3 more columns]
